# Supplementary material for: Single-cell multiomics reveal the scale of multilayered adaptations enabling CLL relapse during venetoclax therapy
Source: PubMed Central journal article supplement — Blood. 2022 Jun 20;140(20):2127–41. doi: 10.1182/blood.2022016040 (PMC10653037; doi:10.1182/blood.2022016040), 2022-06-20
Supplement: BLOOD_BLD-2022-016040-mmc1.pdf [file BLOOD_BLD-2022-016040-mmc1.pdf]

**Supplementary Data for:**

**Single-cell multiomics reveal the scale of multi-layered adaptations enabling CLL relapse during venetoclax therapy**

## Supplementary Methods

### Human Research Ethics Committee approvals

Melbourne Health 2011.044, 2012.092, 2013.016, 2005.008, 2012.274; Peter MacCallum Cancer Centre 03/90, 11/18, 12/45, 13/163, 17/133; Walter and Eliza Hall Institute 05/04, 13/01.

### Drug sensitivity of CLL samples

Freshly isolated mononuclear cells were seeded into 96-well plates at 100,000 cells/well. 6-point 1:8 serial dilutions of venetoclax (Active Biochem #A-1231) or MCL1 inhibitor (S63845; Active Biochem #A-6044) starting from 4  $\mu$ M were used for the cell viability assays. After 24 hrs, cells were stained with CD5-APC (clone BL1a, Beckman Coulter, cat #A60790,) and CD19-BV510 (clone SJ25CI, Becton Dickinson (BD) Biosciences, cat #562947) and cell viability was assessed by propidium iodide (PI, Sigma, cat #P4864) exclusion using a FACSCytoflex (BD). FACS data were analyzed using FlowJo software, and GraphPad Prism software was used to calculate drug concentrations causing 50% cell killing (LC50).

### Whole Exome Sequencing

DNA was extracted from fresh or thawed cryopreserved patient samples using the QIAamp DNA Mini Kit (Qiagen, cat #51304) according to the manufacturer's instructions. For cryopreserved patient samples, PBMCs were thawed and stained with CD19-BV510 antibody (BD Biosciences) at 4°C for 30 min. PBMCs were washed and stained with propidium iodide (PI, Sigma). Viable cells (PI negative) were flow-sorted into tumor (CD19<sup>+</sup>) and normal (CD19<sup>-</sup>) samples using the FACSARIA (BD). For the CLL2 relapsed sample, cells were stained with CD5-APC and CD19-BV510 for 30 min on ice. Cells were fixed with 1.6% paraformaldehyde (Electron Microscope Science) and permeabilized with 1xPerm buffer (Affymetrix eBiosciences). Cells were stained with BCLxL-PE (1:100, clone E18, Abcam, cat #ab208747). Viable CD5<sup>+</sup>CD19<sup>+</sup> BCLxL<sup>lo</sup> cells and viable CD5<sup>+</sup>CD19<sup>+</sup> BCLxL<sup>hi</sup> cells were sorted using the FACSARIA (BD). Library preparation and sequencing were performed at the Australian Genome Research Facility (AGRF), using the TruSeq Nano kit (Illumina), SureSelectXT2 Target Enrichment System and Human All Exon v6 Capture Library (Agilent Technologies) and 150bp paired-end sequencing protocol.

The exome sequencing data were aligned to hg38 with BWA MEM (v0.7.17)<sup>1</sup>, and analyzed for somatic SNVs and CNAs with superFreq (v1.4.2)<sup>2</sup>. All samples were marked as cancer samples for the analysis to lessen the influence of any residual leukemia cells that remained in the normal fraction after sorting. Clonal tracking was used to designate candidate somatic variants, and variants present in the germline clone were removed from the analysis.

### ATAC sequencing

PBMCs were thawed and stained with CD19-BV510 antibody (BD Biosciences) at 4°C for 30 min. PBMCs were washed and stained with propidium iodide (PI, Sigma). 50,000 viable (PI<sup>-ve</sup>) CD19<sup>+</sup> cells were flow-sorted using the FACSARIA (BD). ATAC-seq was performed exactly as described in the protocol<sup>3</sup>. ATAC-seq libraries were subjected to 80bp paired-end sequencing on the Illumina NextSeq platform.

Prior to alignment, adaptor sequences were trimmed from all reads using trim galore (v0.4.4). All fastq files were then aligned to the human genome, build hg38, using Rsubread's (v2.4.2) align function with the 'type' option set to 'dna'<sup>4</sup>. In all cases, at least 85% of fragments were successfully mapped. The resulting bams files were then sorted and indexed, and PCR

duplicate reads marked using Sambamba (v0.6.6). The deepTools software (v3.5.1) was then used to generate coverage profiles around genes. All PCR duplicate reads were excluded from coverage calculations. Coverage plots were generated using the R statistical software (v4.0.2).

### ChIP sequencing

ChIP for H3K27ac (2ug/sample, Abcam, cat #ab4729) and transcription factor binding (c-Rel; 1:100, clone D5G1A, CST, cat #12659, NF- $\kappa$ B2; 1:50, clone D7A9K, CST, cat #12659) was performed as per the ‘ChIP for Histone Proteins’ method<sup>5</sup>, with minor modifications. PBMCs were thawed and stained with CD19-BV510 antibody (BD Biosciences) at 4°C for 30 min. Cells were crosslinked with 1.6% paraformaldehyde (Electron Microscope Science) for 10 min at 37°C. PBMCs were washed and stained with propidium iodide (PI, Sigma). Viable (PI negative) CD19<sup>+</sup> cells were flow-sorted using the FACS Aria (BD). For CLL2 relapsed sample, after crosslinking, cells were permeabilized with 1xPerm buffer (Affymetrix eBiosciences). Cells were stained with BCLxL-PE (1:100, clone E18, Abcam). Viable CD5<sup>+</sup>CD19<sup>+</sup> BCLxL<sup>lo</sup> cells and viable CD5<sup>+</sup>CD19<sup>+</sup> BCLxL<sup>hi</sup> cells were sorted using the FACS Aria (BD). Nuclei were extracted by washing three times in nuclear isolation buffer (20 mM Tris, pH 8.0, 10 mM NaCl, 2 mM EDTA, pH 8.0, 0.5% Igepal CA-630 and 1× Complete Protease Inhibitor (Roche)). Nuclei were resuspended in sonication buffer (20 mM Tris, pH 7.5, 150 mM NaCl, 2 mM EDTA, 1% Igepal CA-630, 0.3% sodium dodecyl sulphate and 1× Complete Protease Inhibitor (Roche)) and sonicated with a Covaris S220 sonicator (peak power, 105W; duty factor, 20%; cycle/burst, 200; duration, 600 sec). Immunoprecipitation with 2  $\mu$ g anti-Histone H3 (acetyl K27) antibody (Abcam); 10  $\mu$ l NF- $\kappa$ B2 p100/p52 antibody (Cell Signaling Technology); 5  $\mu$ l c-REL antibody (Cell Signaling Technology) was performed for a minimum of 16 hrs at 4°C. Immunoprecipitated samples were captured by incubation with 20  $\mu$ l Dynabeads Protein G (Life Technologies). Reverse crosslinking of DNA was followed by DNA purification with the ChIP DNA Clean and Concentrator Kit (Zymo Research). An input of 100ng of genomic DNA per sample was prepared and indexed for Illumina sequencing using the TruSeq DNA sample Prep Kit (Illumina) as per the manufacturer’s instructions. The indexed libraries were then pooled and prepared for paired end sequencing on a NextSeq500 instrument using the 150 cycle kit v2 chemistry (Illumina) as per the manufacturer’s instructions. The base calling and quality scoring were determined using Real-Time Analysis on board software (v2.4.6), while the FASTQ file generation and de-multiplexing utilized bcl2fastq conversion software (v2.15.0.4).

All samples were aligned to the hg38 build of the human genome using Rsubread’s align function with the ‘type’ argument set to ‘dna’. This process also sorted and indexed the samples. In all cases at least 78% of fragments were successfully aligned. Following alignment, PCR duplicate reads were marked using Sambamba. Similarly, to the ATACseq data, the deepTools software was used to generate coverage profiles around genes, which were then visualized using the R statistical software.

### TotalSeq C antibodies

CD3 (clone UCHT1, cat #300479, lot #B282150), CD4 (clone RPA-T4, cat #300567, lot #B282146), CD8 (clone SK1, cat #344753 lot #B280232), CD16 (clone 3G8, cat #302065, lot #B273582), CD11c (S-HCL-3, cat #371521, lot #B281421), CD14 (clone 63D3, cat #367137, lot #B283728), CD45RA (clone HI100, cat #304163, lot #B282142), CD5 (clone UCHT2, cat #300637, lot #B281430), CD56 (clone 5.1H11, cat #362559, lot #B283279), CXCR4 (clone 12G5, cat #306533, lot #B28022), CD20 (clone 2H7, cat #302363, lot #B274537), CD25 (clone BC96,

cat #302649, lot #B282145), CD38 (clone HIT2, cat #30354, lot #B280225), CCR7 (clone G043H7, cat #353251, lot #B280225), HLA-DR (clone L243, cat #307663, lot #B282155), IgM (clone MHM-88, cat #314547, lot #B283295).

### Mass Cytometry

Freshly thawed patient samples were incubated with cisplatin to allow detection of non-viable cells, fixed with 1.6% paraformaldehyde (PFA: Electron Microscopy Sciences), washed and stored at -80°C. Samples for batch analysis were barcoded using the 20-plex palladium barcoding kit according to the manufacturer's instructions (Fluidigm, South San Francisco, CA, USA). Following barcoding, cells were washed then stained with specific antibody-metal conjugates (CD19-142 Nd, CD5-143 Nd) for 1 hr at room temperature. Cells were permeabilized with methanol at 4°C for 10 min and washed. Cells were then stained antibodies against intracellular markers (cCaspase3-173 Yb, Cyclin D1-139 La, Cyclin B1-151 Eu, pRb [S807/811] - 166 Er, pPLCg2 [pY759]- 144 Nd, pERK 1/2 [T202/Y204]-167 Er, pS6 [S235/S236]-175 Lu, pCREB [S133] 87G3-176 Yb, MCL1-160 Gd, BCLxL-153 Eu), washed and stained with 125nM <sup>191</sup>Ir/<sup>193</sup>Ir DNA intercalator (Fluidigm) overnight. After washing, cells were resuspended with EQ normalization beads immediately before analysis using a Helios mass cytometer (Fluidigm). Data concatenation, normalization and debarcoding are done with the Premessa R package (<https://github.com/ParkerICI/premessa>). Single cells were gated using the FlowJo based on event length and <sup>191</sup>Ir/<sup>193</sup>Ir DNA contents to avoid debris and doublets. CD5<sup>+</sup>CD19<sup>+</sup> live non-apoptotic cisplatin<sup>lo</sup> cells were analyzed for levels of the various metal conjugates.

### Proliferation assay

Cryopreserved patient samples were thawed and labelled with 1 μM Cell Trace Violet (ThermoFisher) as described previously<sup>6</sup>. Cells were cultured on mouse embryonic fibroblast cells stably expressing the human CD40 ligand in the presence of rhIL-21 (25 ng/ml, R&D systems). After 7 days, cells were stained with CD5-APC (clone BL1a, Beckman Coulter) and CD19-BV510 (clone SJ25CI, BD Biosciences), and analyzed by FACSCytoflex (BD) before assessing proliferation using FlowJo software.

### CLL cell culture

Peripheral blood mononuclear cells (PBMCs) from CLL patients were cultured with 1 μM NFκB inhibitor (IKK-16, Selleckchem), 1 μM JAK inhibitor (Tofacitinib, Selleckchem) or 100 nM PI3K inhibitor (buparlisib, Selleckchem) or DMSO control for 3 days. Afterwards, viability was measured by propidium iodide (PI, Sigma) exclusion using a FACSCytoflex (BD).

### qRT-PCR

RNA was extracted using the standard phenol-chloroform extraction protocol using TRIzol™ (Ambion Inc). Isolated RNA was reverse transcribed using oligo-dT primers and the Super Script III First Strand cDNA Synthesis Kit (Invitrogen) according to the manufacturer's instructions. Quantitative RT-PCR reactions were performed in triplicate using the TaqMan™ Fast Advanced Master Mix (Applied Biosystems, Thermo Fisher) for *BCL2* (Cat #Hs00608023\_m1), *MCL1* (Cat #Hs03043899\_m1), *BCLxL* (Cat #Hs00236329\_m1), *BCL2A1* (Cat #Hs00187845\_m1), *PMAIP1* (Cat #Hs00560402\_m1), *REL* (Cat #Hs00968440\_m1) and *NFKB2* (Cat #Hs00174517\_m1). Data were collected using the Vii7 PCR System (Thermo Fischer Scientific) using the Vii7™

software package (Thermo Fischer Scientific). Probing for GAPDH (Cat# Hs02786624\_g1) served as a housekeeping control gene. Data were calculated using the  $2^{-\Delta\Delta ct}$  method.

### Generation of cell lines expressing *PMAIP1/NOXA*

HA-tagged PMAIP1<sup>WT</sup> or PMAIP1 <sup>$\Delta$ 22bp</sup> were synthesized as gene fragments by Integrated DNA Technologies (IDT) and subcloned into retroviral vector pMSCV-IRES-BFP. The constructs were sequenced (AGRF) and transduced into *PMAIP1* <sup>$\Delta/\Delta$</sup>  RS4;11 cells as previously described<sup>7</sup>. Cells successfully integrated with the retroviruses (BFP<sup>+</sup>) were sorted by flow cytometry.

### Immunoblotting

Immunoblotting was carried out as described previously<sup>7</sup>. Briefly, total protein from cells was isolated using lysis buffer (20 mM Tris-HCl pH 7.4, 135 mM NaCl, 1.5 mM MgCl<sub>2</sub>, 1 mM EDTA, 10% glycerol) supplemented with complete protease inhibitors (Roche). Membranes were probed with antibodies against MCL1 (clone 19C4, WEHI Antibody Services), HA (3F10; Roche Applied Science) or HSP70 (clone N6, gift of Drs R Anderson and W Welch) as the protein loading control. Detection was performed by ChemiDoc Imaging System (Bio-Rad).

### Targeted DNA sequencing

The 22bp *PMAIP1/NOXA* deletion in CLL2 was confirmed by sequencing PCR amplicons encompassing the genomic loci of *PMAIP1/NOXA* using the following primers: Fwd: 5'-AGTCAGGTTCCCTGAGCAGAA-3', 5'-GGATATCAGATCAGTTTGTCTC-3', 5'-CAGAAGTTTCTGCCGGAAGT-3' and Rvs: 5'-GCTTTCGGTGAGTCACAATG-3'. BAX splice site mutation (chr19: 49458803 A→C) in the samples from CLL6 were confirmed by sequencing the amplicons generated using the primers 5'-TAGCGTTCCCCTAGCCTCTT-3' and 5'-ATGGAGTGAGGGTGCAGAAT-3'.

Supplementary Figure 1

A

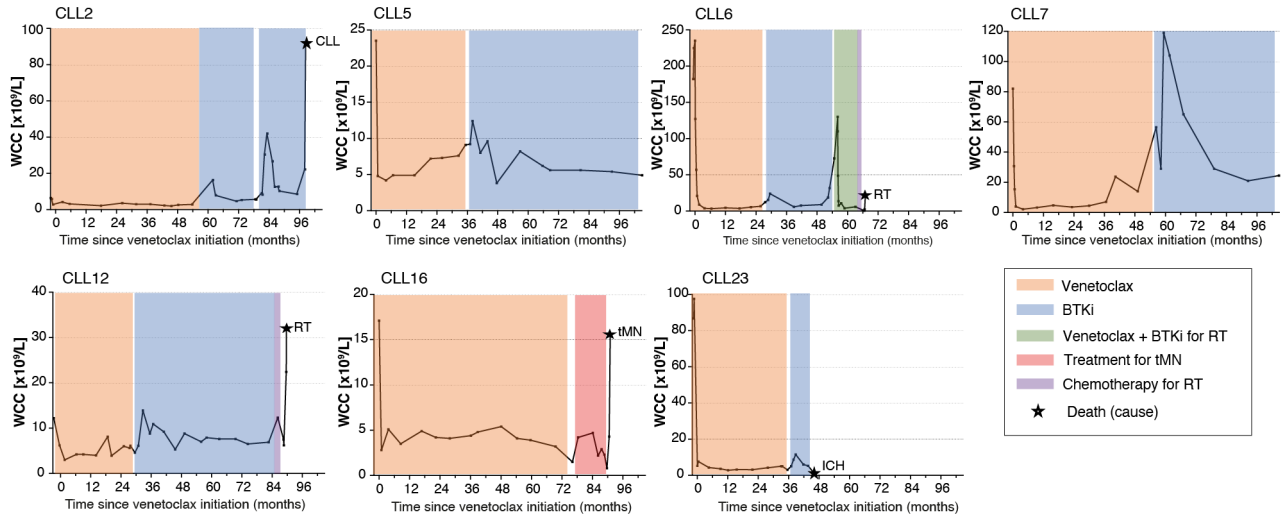

B

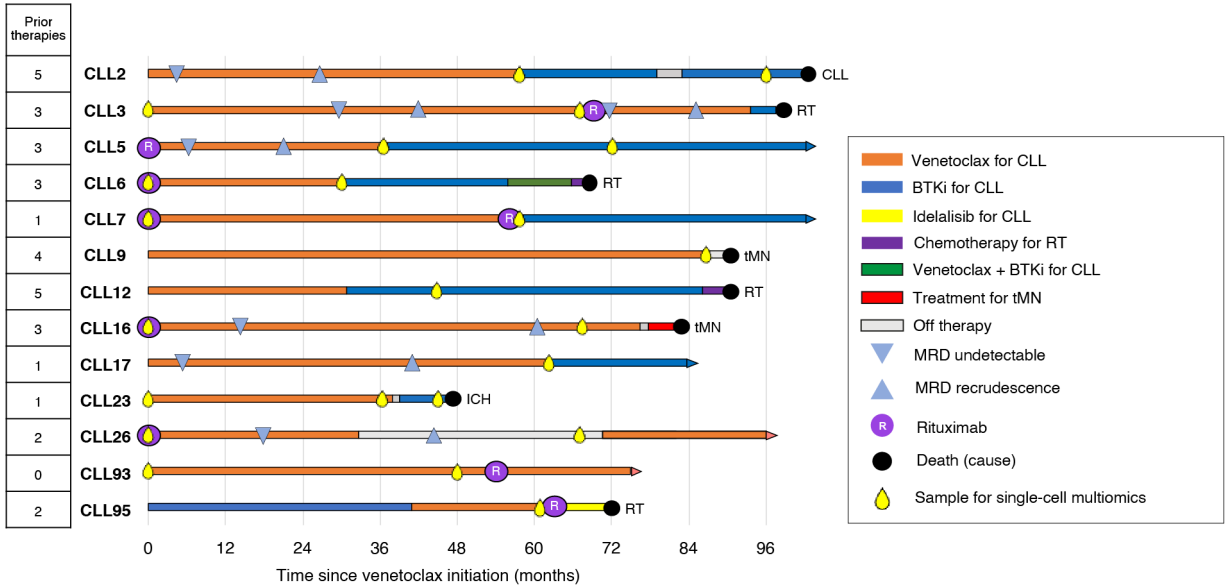

C

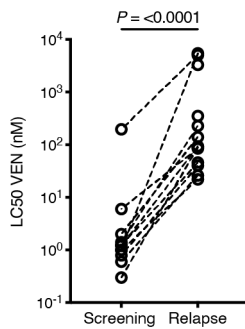

**Supplementary Figure 1 CLL cells from patients with disease progressing after prolonged venetoclax treatment are less sensitive to venetoclax *in vitro*.**

(A) Peripheral blood white cell counts (WCC x10<sup>9</sup>/L) during VEN treatment and subsequent therapies. BTKi: Bruton Tyrosine Kinase inhibitor; tMN: therapy-related myeloid neoplasm; ICH: intracranial hemorrhage; RT: Richter transformation.

(B) Individual timelines for each patient showing treatments, outcomes and points at which samples were collected for single-cell multiomics. MRD (measurable residual disease) undetectable: first confirmation of peripheral blood undetectable MRD (CLL cells <0.01% of leukocytes), MRD recrudescence: first confirmation of re-emergence of positivity for MRD in peripheral blood (CLL cells ≥ 0.01% of leukocytes).

(C) *In vitro* sensitivity to VEN (0-4 μM for 24 hours) of peripheral blood CLL cells (CD5<sup>+</sup>CD19<sup>+</sup>) from patients prior to commencing VEN (n=11) or at leukaemic relapse (n=13). LC50 values are indicated. Dashed lines indicate paired samples. *P* value is from a two-sided paired t-test.

Supplementary Figure 2

A

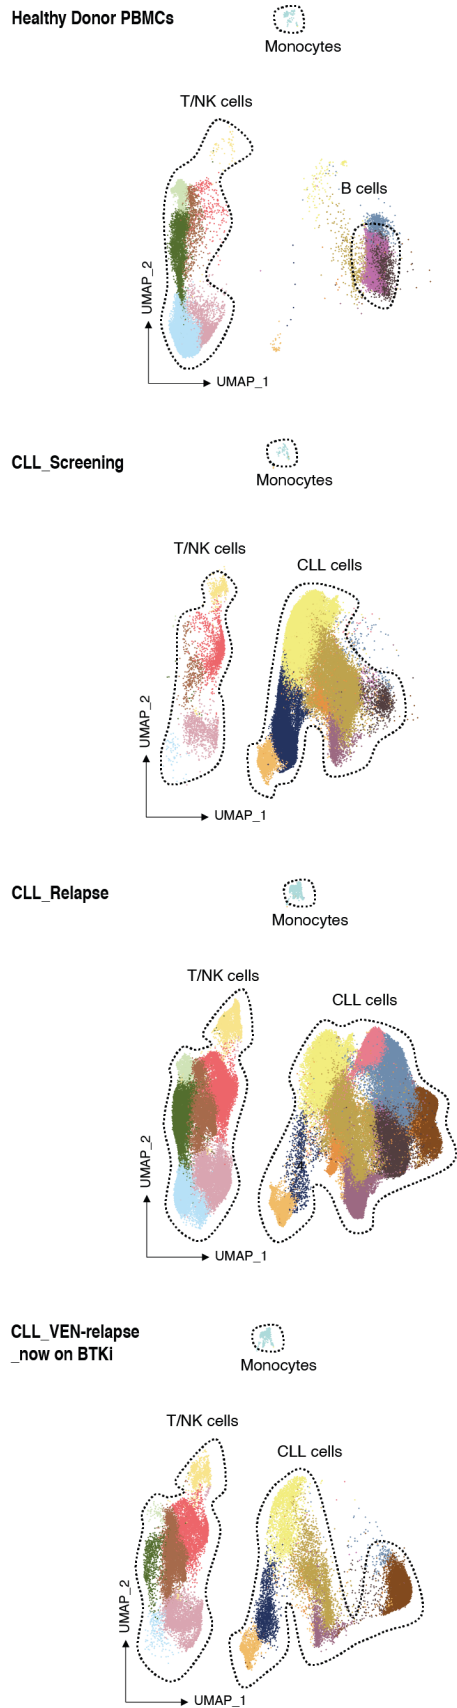

B

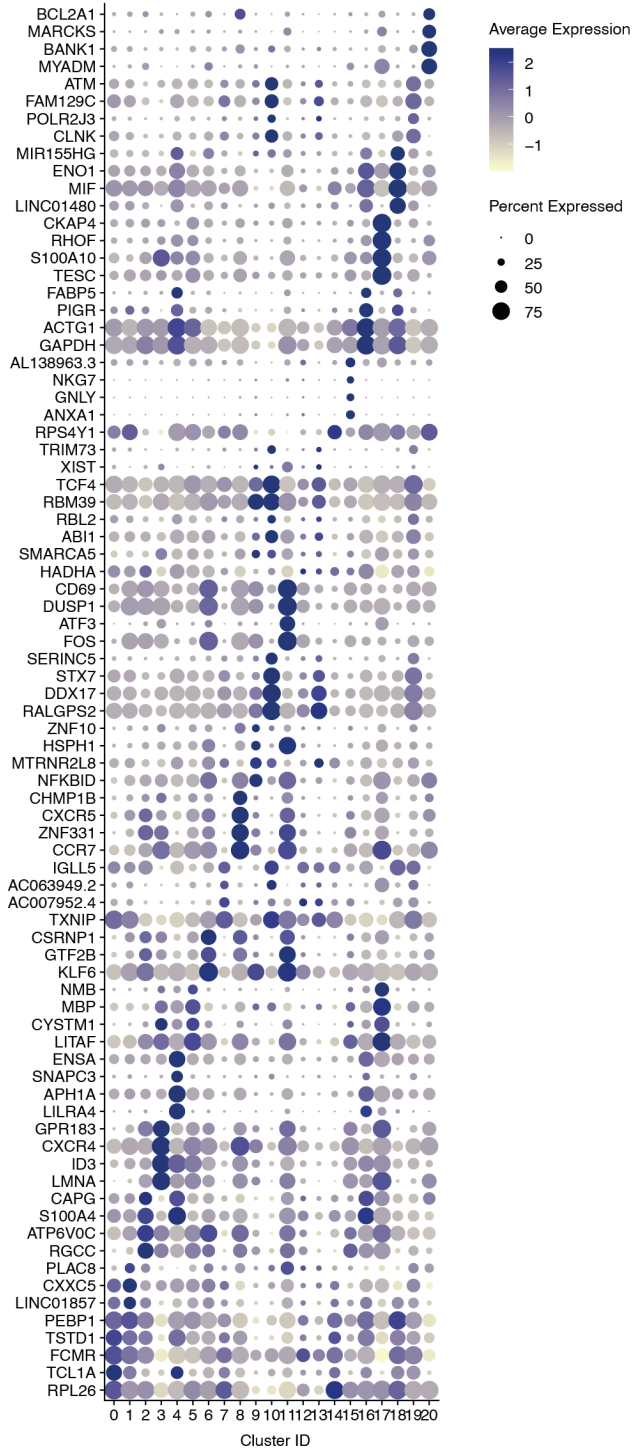



**Supplementary Figure 2 CLL cells have a unique transcriptional profile.**

**(A)** Uniform Manifold Approximation and Projection (UMAP) of PBMCs (peripheral blood mononuclear cells) from healthy donors (top panel), or CLL cells from patients at screening (2<sup>nd</sup> panel), from CLL patients at disease relapse on VEN (3<sup>rd</sup> panel), or from patients with relapsed disease subsequently treated with a Bruton Tyrosine Kinase inhibitor (BTKi; bottom panel).

**(B)** Dot plots showing the top 4 marker genes that distinguish each of the 20 clusters in Figure 1c. Color intensity indicates relative level of gene expression, and the size of dot indicates fraction of cells expressing that gene in the cluster.

Supplementary Figure 3

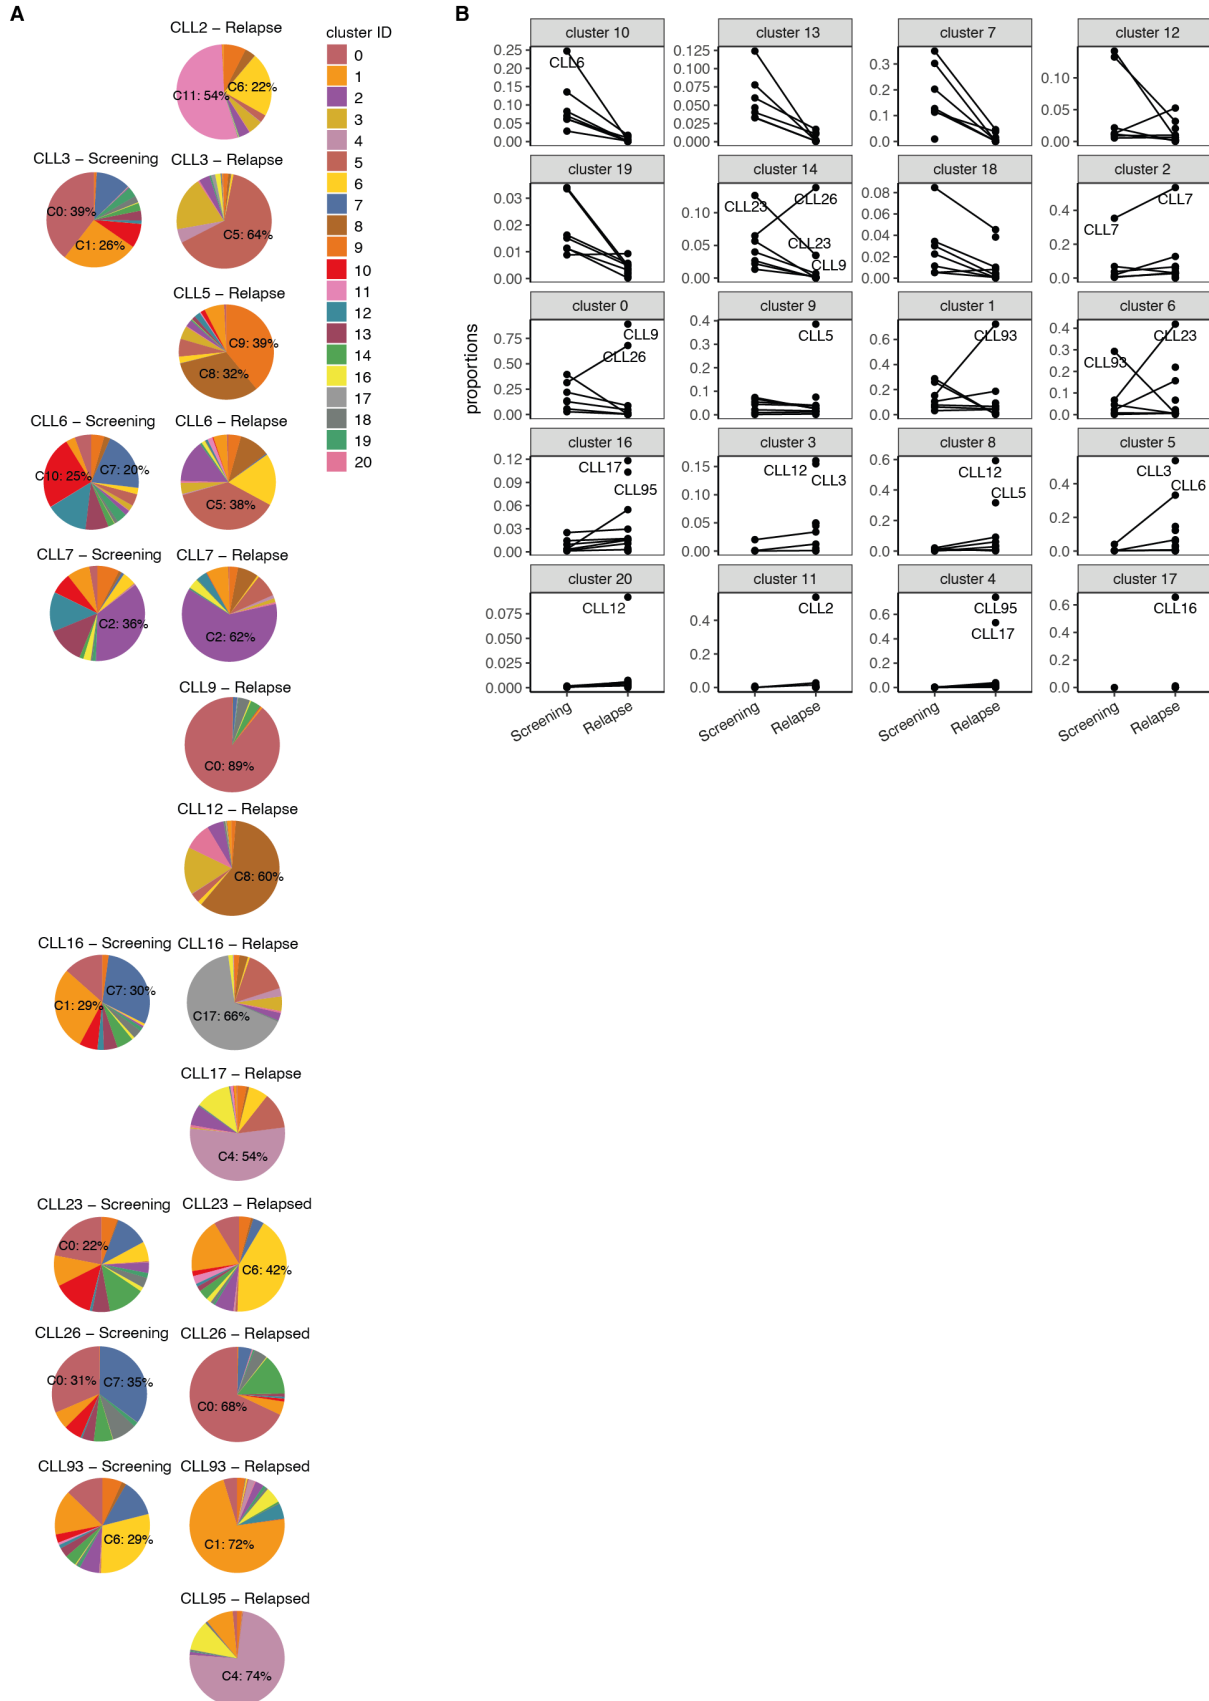

**Supplementary Figure 3 High degree of intra-patient and inter-patient heterogeneity in cluster distribution.**

(A) Pie charts showing the proportion of CLL cells in each cluster for the indicated individual patient sample. Dominant clusters (C) are noted for each sample.

(B) Box plots showing the change in representation of each cluster at VEN-relapse (except for CLL26 where CLL recurred occurred after many months off VEN therapy). Outlying samples are indicated by the sample number e.g., decreased representation of cells in cluster 10 for CLL6 at relapse (top left panel); where samples are available, the lines join the paired samples. Note that the scales of the Y-axes are varied.



**Supplementary Figure 4 Landscape of genetic changes upon venetoclax relapse.**

Somatic mutations or copy number alterations detected in key CLL and apoptosis pathway genes by bulk whole exome sequencing (WES) of 13 patients with VEN-relapse in this study. VAF alterations detected at >15% are shown. LOH: loss of heterozygosity, amp: amplification. Loss of SETD2 and RB1 in relapsed CLL2 BCLxL<sup>hi</sup> population and loss of RB1 in relapsed CLL6 were not called by SuperFreq, but visual inspection of the gene-level data suggests these events were present at relapse as well at screening prior to starting VEN.

Supplementary Figure 5

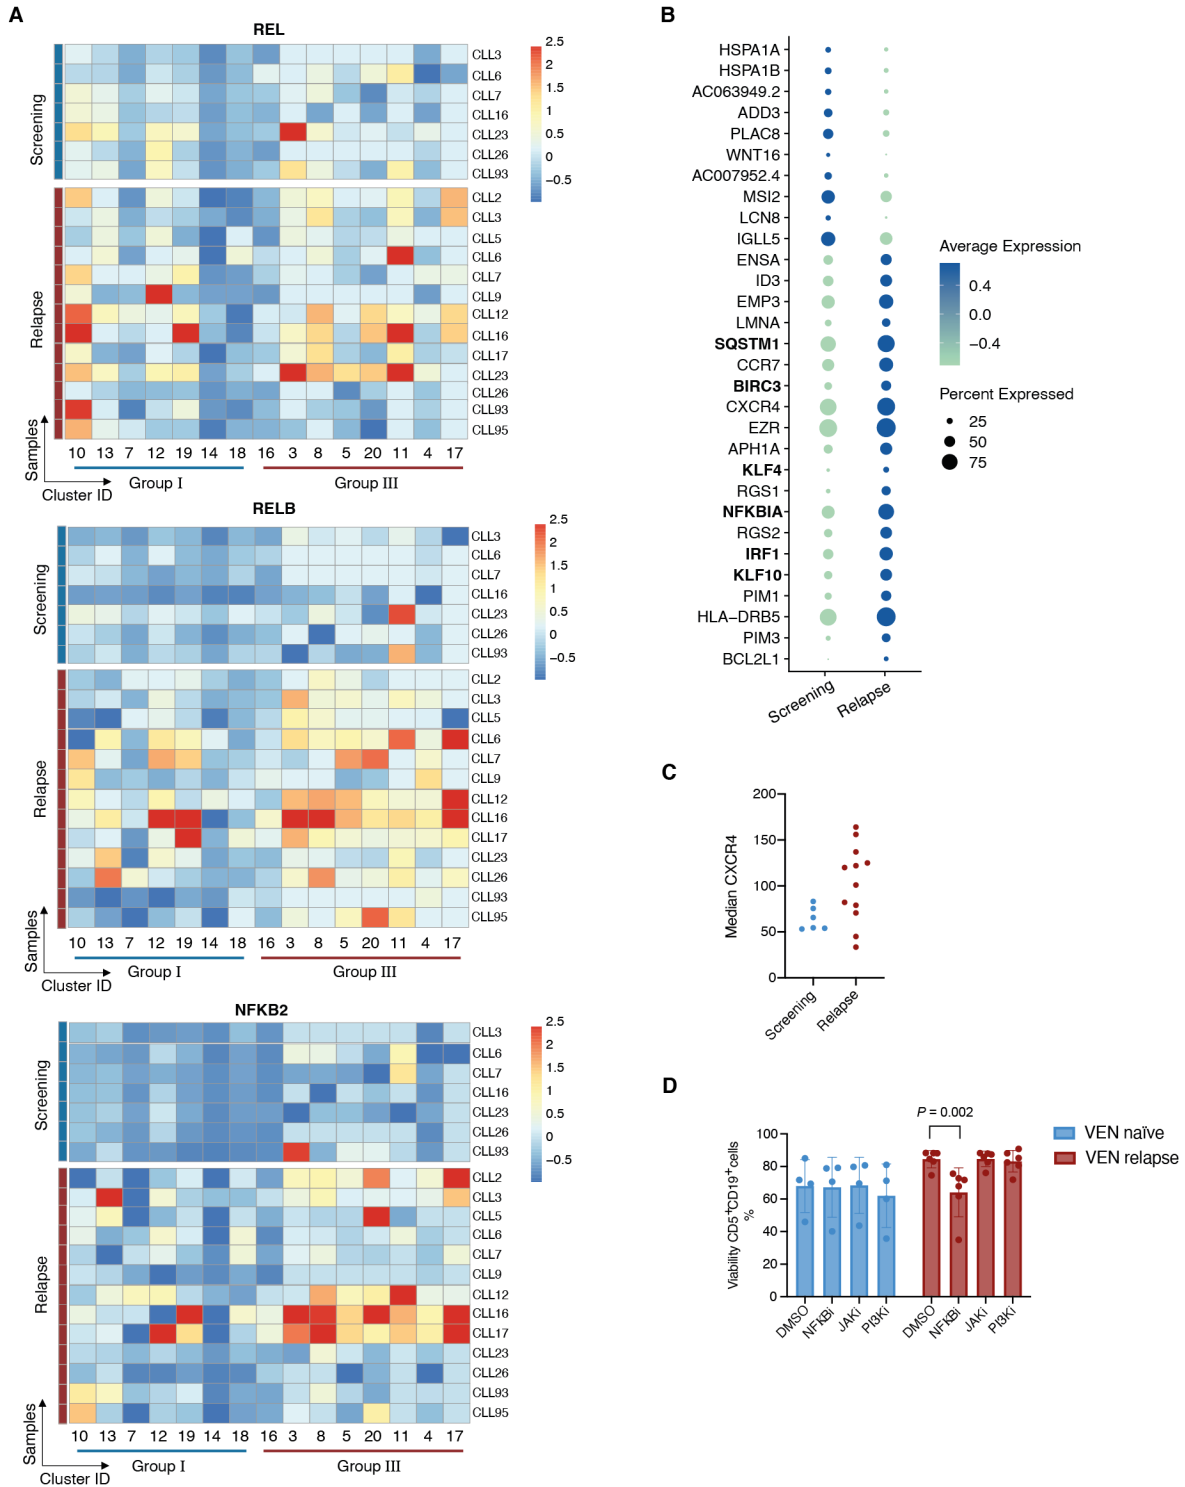

**Supplementary Figure 5 Venetoclax resistant cells display show increased NF- $\kappa$ B signalling.**

**(A)** Heatmaps showing expression of *REL* (top), *RELB* (middle) or *NFKB2* (bottom) in each cluster (columns) across the patient samples (rows).

**(B)** Dot plots showing marker genes that distinguish VEN-relapse cells from the pre-VEN cells present in the 5 clusters shared by the screening and relapsed samples (Group II in Figure 1d).

Genes related to the NF- $\kappa$ B pathway are indicated in bold.

**(C)** Mass cytometric analysis of CXCR4 protein expression in viable (cisplatin<sup>lo</sup>) CD5<sup>+ve</sup>CD19<sup>+ve</sup> CLL cells from screening (blue, n=6) or relapsed samples (red, n=11). Median expression for each sample was calculated by FlowJo. A two-sided paired T-test was used to determine statistical significance: no significant difference was detected.

**(D)** PBMCs from VEN-naïve (n=4) or relapsed (n=6) patient samples were cultured with 1  $\mu$ M IKK16 (NF- $\kappa$ Bi), 1  $\mu$ M tofacitinib (JAKi), 100 nM buparlisib (PI3Ki) or DMSO control for 3 days. Data represent means  $\pm$  SD of CLL cell (CD5<sup>+ve</sup>CD19<sup>+ve</sup> viability (PI<sup>-ve</sup>) calculated for each patient sample, assayed in triplicate, for each condition in a single experiment. A one-way ANOVA was used followed by Dunnett's multiple comparison test to determine statistical significance.

Supplementary Figure 6

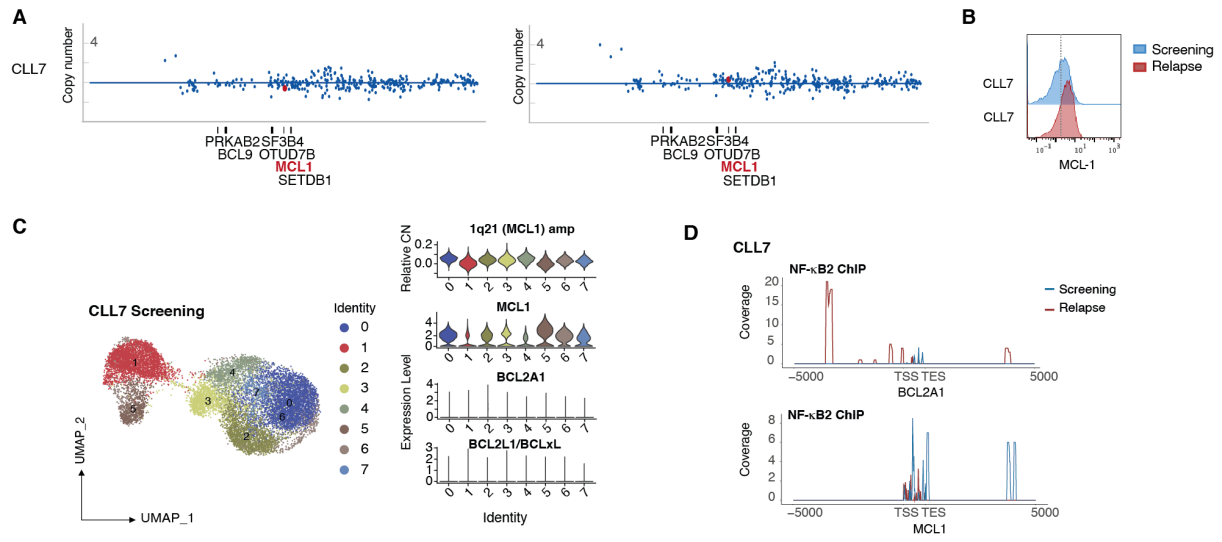



**Supplementary Figure 6 Increased *MCL1* expression driven by NF- $\kappa$ B at venetoclax relapse.**

**(A)** Representation of the gained genomic regions in the 1q locus across the screening and relapsed samples from CLL7 analyzed by WES. *MCL1* is highlighted in red. Grey dotted lines indicates copy number of 2. Blue lines indicate copy number inferred from WES data.

**(B)** Histograms showing mass cytometric analysis of MCL1 protein expression in viable (cisplatin<sup>lo</sup>) CD5<sup>+ve</sup>CD19<sup>+ve</sup> peripheral blood mononuclear cells (PBMCs) from screening and relapsed sample from CLL7.

**(C)** UMAP projections of CLL cells (left) from relapse samples from the screening sample from patient CLL7. Violin plots (right) show inferred copy number (CN) variation of 1q21 [*MCL1*] (top) and expression of *MCL1*, *BCL2A1* or *BCLxL* (*BCL2L1*) across the different clusters.

**(D)** NF- $\kappa$ B2 ChIP at the *BCL2A1* and *MCL1* loci 5,000 kb upstream of the transcriptional start site (TSS) or 5,000 kb downstream of the transcriptional end site (TES) in CLL cells at screening or relapse of CLL7.

Supplementary Figure 7

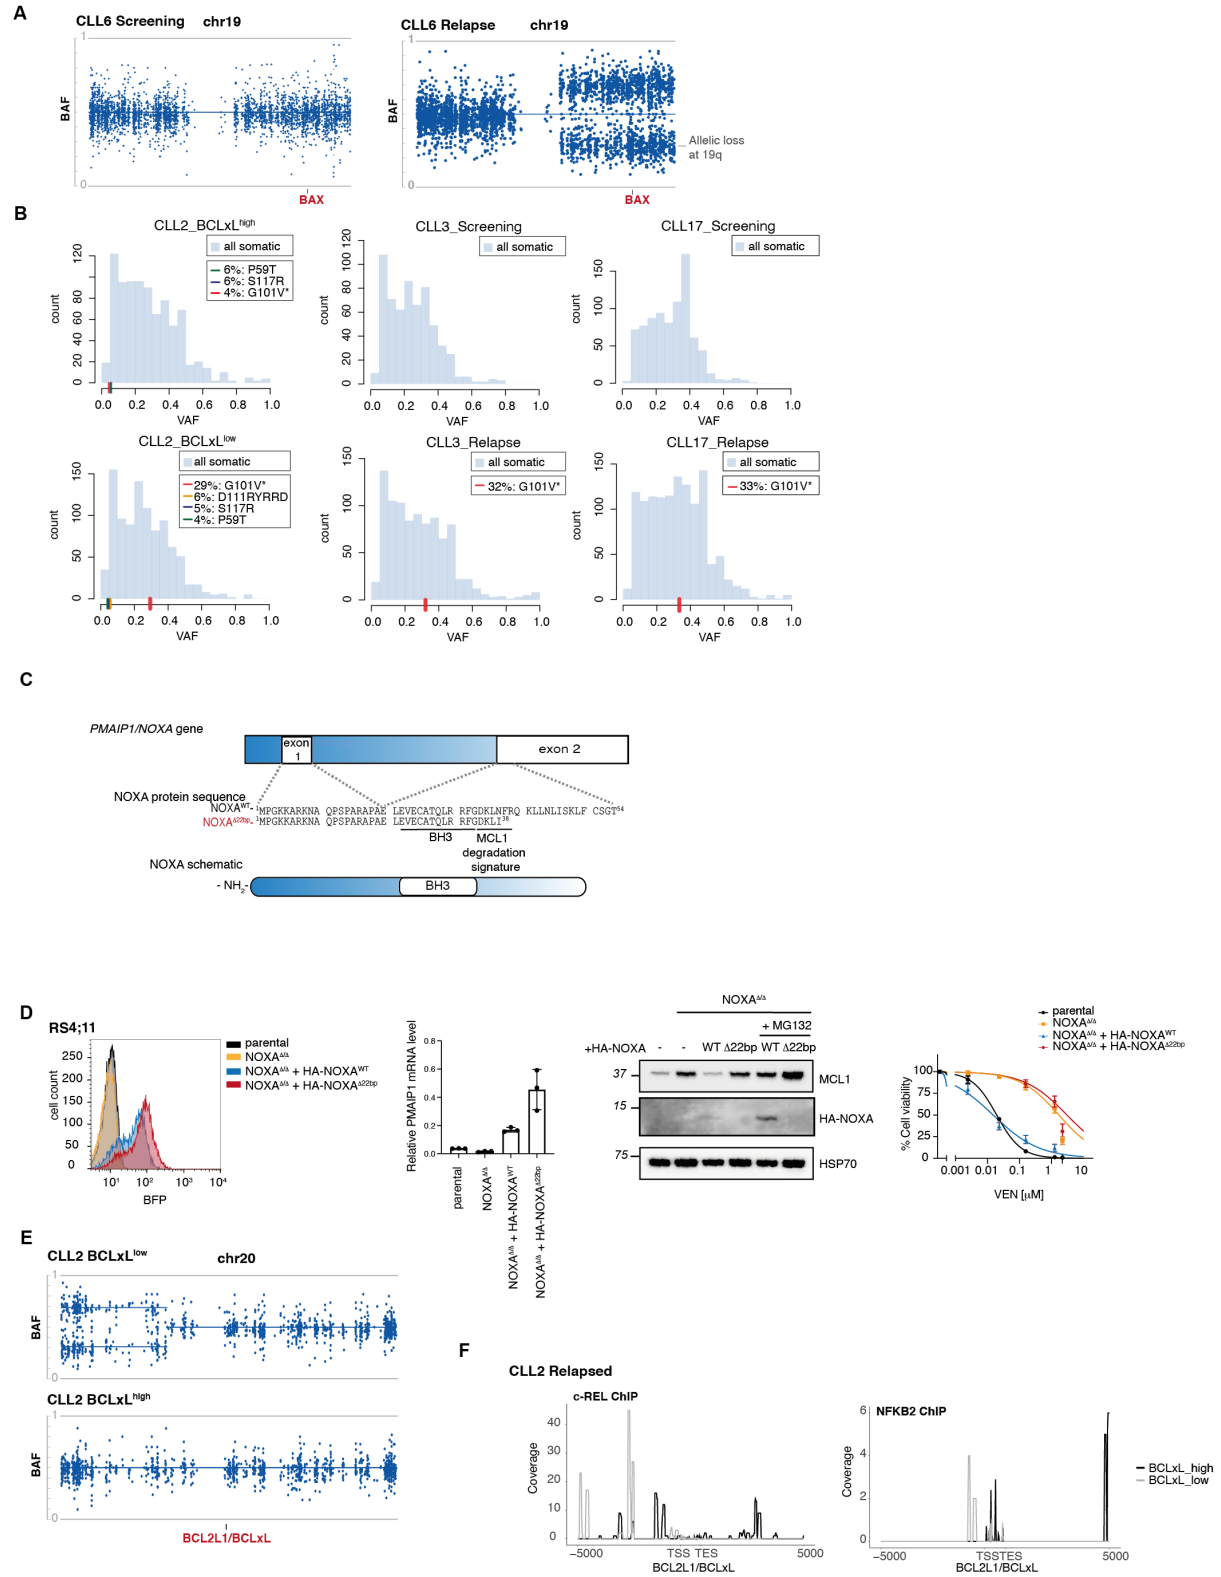

**Supplementary Figure 7 In addition to *BCL2* G101V, multiple independent changes confer resistance to venetoclax.**

**(A)** BAF analysis of chromosome 19 for CLL6 at screening (left) and relapsed (right) based on WES data. The location of the *BAX* locus is indicated.

**(B)** Bar plots showing the variant allele frequency (VAF) of all somatic mutations measured by WES on flow-sorted CD19<sup>+</sup>CD5<sup>+</sup> cells from screening and relapsed samples of CLL3 and CLL17, or relapsed CLL2 (BCLxL<sup>lo</sup> or BCLxL<sup>hi</sup>). The VAFs for the indicated *BCL2* mutations are represented with coloured ticks at the bottom. \**BCL2* mutations previously reported in these samples. Number of somatic nucleotide variations with the germline clone and dbSNP variants removed for CLL3 was 163 (screening) vs 251 (relapse), and 228 (screening) vs 376 (relapse) for CLL17.

**(C)** Schematic of *NOXA* (*PMAIP1*) gene, protein sequence and BH3 domain, detailing both *NOXA-WT* and the *NOXA* with 22 bp deletion (*NOXA*<sup>Δ22bp</sup>) found in CLL2.

**(D)** Expression of *HA-NOXA*<sup>WT</sup> and *HA-NOXA*<sup>Δ22bp</sup> assessed by BFP levels (pMSCV-IRES-BFP) measured by flow cytometry (left), mRNA levels measured by qPCR (middle), or NOXA and MCL1 protein levels measured by western blot in parental or engineered RS4;11 B-ALL cells (treated with the proteasome inhibitor MG132 to block degradation of NOXA and MCL1) (right); HSP70 blotting served as the loading control. Experiments were repeated on three separate occasions. Viability was determined by CellTiter-Glo assay on cells treated with 0-10 μM of VEN for 24 hrs (far right). Data shown are means ± SD of ≥3 independent experiments.

**(E)** BAF analysis of chromosome 20 for BCLxL<sup>lo</sup> (top) and BCLxL<sup>hi</sup> (bottom) cells from CLL2 at relapse inferred from WES. The location of *BCLxL* (*BCL2L1*) on the locus is indicated.

(F) c-REL or NF- $\kappa$ B2 ChIP at the *BCLxL* (*BCL2L1*) locus 5,000 kb upstream of the TSS and 5,000 kb downstream of the TES in flow-sorted CD19<sup>+ve</sup>CD5<sup>+ve</sup> BCLxL<sup>hi</sup> (black) or BCLxL<sup>lo</sup> (grey) cells from CLL2.

Supplementary Figure 8

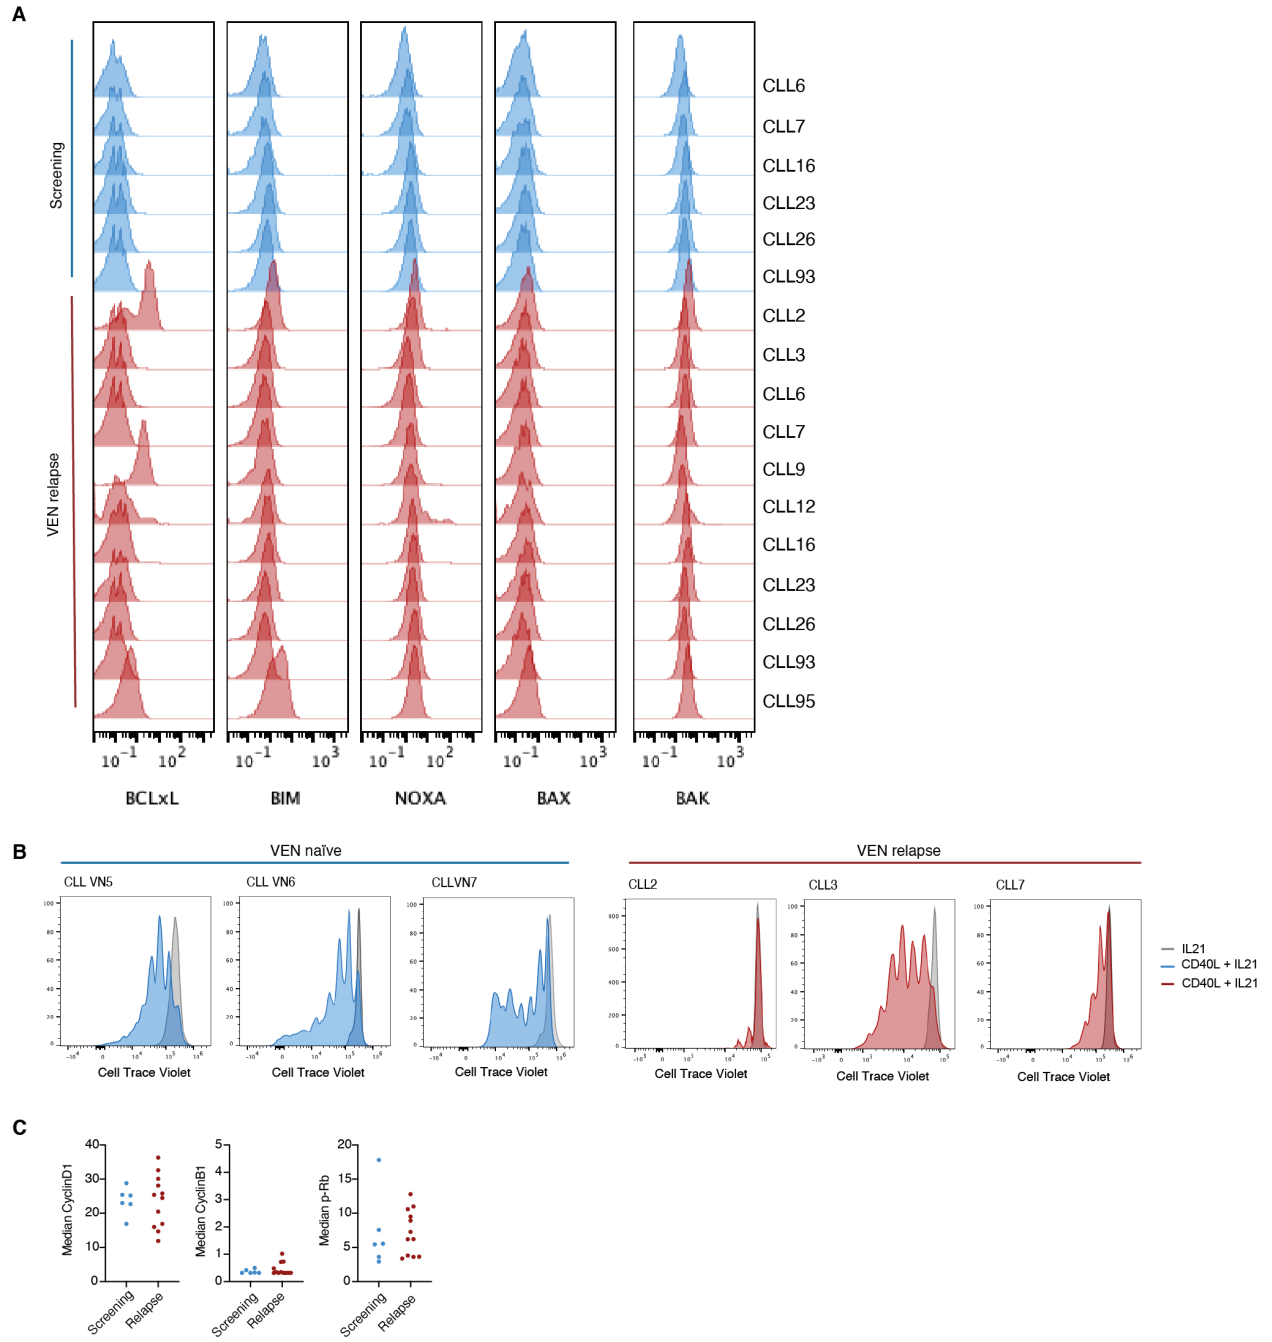

**Supplementary Figure 8 Proliferation was unaffected at venetoclax relapse.**

**(A)** Mass cytometric analysis of BCL<sub>x</sub>L, BIM, NOXA, BAX and BAK protein expression in viable (cisplatin<sup>lo</sup>) CD5<sup>+</sup>CD19<sup>+</sup> PBMCs from screening samples (blue, n=6) and relapsed samples (red, n=11). MCL-1 protein expression data is in Figure 2C.

**(B)** PBMCs from VEN-naïve (VN; n=3) or VEN-relapse patients were labelled with cell trace violet and cultured with 25 ng/ml IL21 only (grey lines) or CD40L + IL21 (blue lines: VEN-naïve samples, red lines: VEN-relapsed samples). After 7 days, cells were stained with CD5 and CD19 antibodies, and cell trace violet was measured in CLL cells by flow cytometry. Plots representative of triplicate experiments.

**(C)** Mass cytometric analysis of Cyclin D1, Cyclin B1 protein or phosphorylated-Rb expression in viable (cisplatin<sup>lo</sup>) CD5<sup>+</sup>CD19<sup>+</sup> PBMCs from screening samples (blue, n=6) and relapsed samples (red, n=11). Median expression for indicated protein was calculated using FlowJo. A two-sided paired t-test was used to determine statistical significance: no significant difference was detected.

Supplementary Figure 9

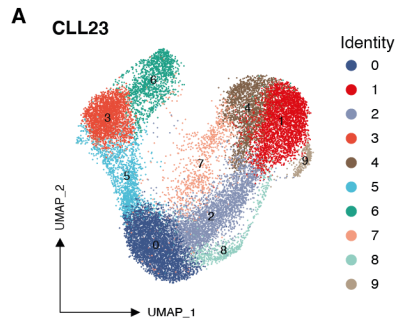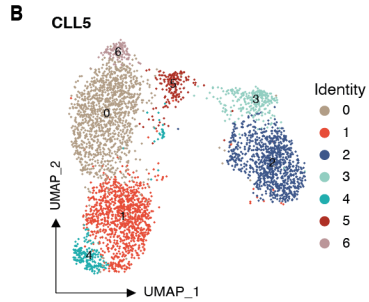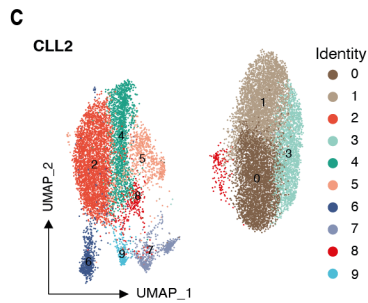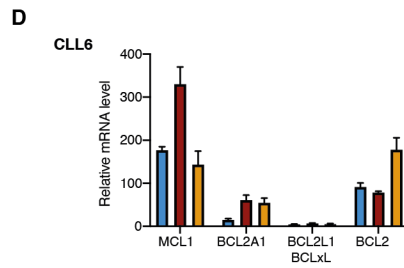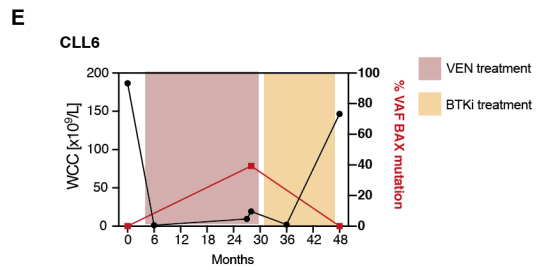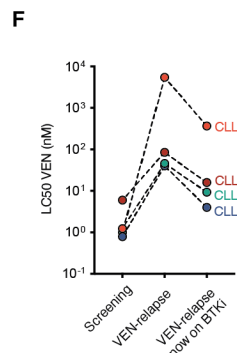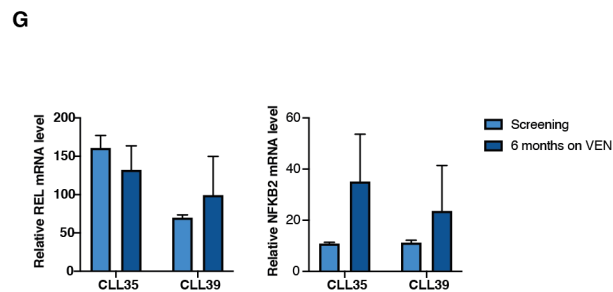

**Supplementary Figure 9 Transcriptional changes maintained by venetoclax therapy.**

**(A-C)** UMAP projections with cluster assignment for all CLL cells from CLL23 **(A)**, CLL5 **(B)** and CLL2 **(C)**.

**(D)** Expression, determined by qPCR, of *MCL1*, *BCL2A1*, *BCLxL* (*BCL2L1*) and *BCL2* in CLL6 samples collected at screening, VEN-relapse or after switching to a BTKi. Data represent means  $\pm$  SD of triplicate measurements from a single experiment.

**(E)** White cell counts (left) and *BAX* mutation VAF were measured by targeted DNA sequencing while on or off VEN.

**(F)** *In vitro* VEN sensitivity of CLL cells (LC50s) from the indicated patients prior to VEN, at VEN-relapse or after VEN discontinuation (and on a BTKi >1year).

**(G)** Thawed samples from screening and after 6 months of ongoing VEN treatment from CLL35 and CLL39 were flow sorted for CD19<sup>+ve</sup> cells. *REL* and *NFKB2* expression were measured by qPCR. Data represent means  $\pm$  SD of triplicate measurements in a single experiment.



### Supplementary References

1. Li HW. Aligning sequence reads, clone sequences and assembly contigs with BWA-MEM. *arXiv: Genomics*. 2013.
2. Flensburg C, Sargeant T, Oshlack A, Majewski IJ. SuperFreq: Integrated mutation detection and clonal tracking in cancer. *PLoS Comput Biol*. 2020;16(2):e1007603.
3. Buenrostro JD, Wu B, Chang HY, Greenleaf WJ. ATAC-seq: A Method for Assaying Chromatin Accessibility Genome-Wide. *Curr Protoc Mol Biol*. 2015;109:21 29 21-21 29 29.
4. Liao Y, Smyth GK, Shi W. The R package Rsubread is easier, faster, cheaper and better for alignment and quantification of RNA sequencing reads. *Nucleic Acids Res*. 2019;47(8):e47.
5. Jansz N, Keniry A, Trussart M, et al. Smcld1 regulates long-range chromatin interactions on the inactive X chromosome and at Hox clusters. *Nat Struct Mol Biol*. 2018;25(9):766-777.
6. Pascutti MF, Jak M, Tromp JM, et al. IL-21 and CD40L signals from autologous T cells can induce antigen-independent proliferation of CLL cells. *Blood*. 2013;122(17):3010-3019.
7. Djajawi TM, Liu L, Gong JN, et al. MARCH5 requires MTCH2 to coordinate proteasomal turnover of the MCL1:NOXA complex. *Cell Death Differ*. 2020;27(8):2484-2499.

**Supplementary Table 1. Marker genes for the 20 CLL clusters.** List of differently expressing genes for the clusters in Fig. 1c.

| p_val     | avg logFC   | pct.1 | pct.2 | p_val adj | cluster | gene       |
|-----------|-------------|-------|-------|-----------|---------|------------|
| 6.14E-191 | 0.641222666 | 0.992 | 0.858 | 1.14E-186 | 0       | RPL26      |
| 3.24E-165 | 0.938522612 | 0.829 | 0.437 | 6.05E-161 | 0       | TCL1A      |
| 7.38E-139 | 0.568763068 | 0.976 | 0.766 | 1.38E-134 | 0       | TXNIP      |
| 9.82E-119 | 0.482732881 | 0.926 | 0.704 | 1.83E-114 | 0       | NCF1       |
| 1.33E-118 | 0.53642068  | 0.978 | 0.822 | 2.47E-114 | 0       | FCMR       |
| 1.31E-115 | 0.529348196 | 0.852 | 0.586 | 2.44E-111 | 0       | TSTD1      |
| 3.90E-113 | 0.454395631 | 0.967 | 0.818 | 7.27E-109 | 0       | PFN1       |
| 1.00E-111 | 0.465305453 | 0.849 | 0.51  | 1.87E-107 | 0       | CD79B      |
| 1.16E-97  | 0.504282104 | 0.656 | 0.348 | 2.17E-93  | 0       | HCST       |
| 2.81E-96  | 0.487941612 | 0.912 | 0.681 | 5.23E-92  | 0       | RAC2       |
| 2.73E-93  | 0.426829571 | 0.988 | 0.869 | 5.08E-89  | 0       | CD79A      |
| 2.13E-89  | 0.4765378   | 0.817 | 0.562 | 3.97E-85  | 0       | SMARCB1    |
| 1.03E-86  | 0.437450441 | 0.909 | 0.708 | 1.92E-82  | 0       | ERP29      |
| 2.36E-85  | 0.435410126 | 0.781 | 0.51  | 4.41E-81  | 0       | GMFG       |
| 3.02E-84  | 0.399092705 | 0.81  | 0.53  | 5.63E-80  | 0       | FCRLA      |
| 1.76E-82  | 0.425844542 | 0.504 | 0.228 | 3.28E-78  | 0       | GYPC       |
| 2.31E-82  | 0.433339009 | 0.536 | 0.218 | 4.31E-78  | 0       | AC243960.1 |
| 1.62E-81  | 0.302378242 | 0.672 | 0.363 | 3.01E-77  | 0       | TRAF3IP3   |
| 3.03E-80  | 0.329568419 | 0.925 | 0.726 | 5.65E-76  | 0       | TMA7       |
| 1.52E-79  | 0.385635991 | 0.992 | 0.886 | 2.84E-75  | 0       | RPS20      |
| 6.80E-75  | 0.428835202 | 0.534 | 0.254 | 1.27E-70  | 0       | ALOX5AP    |
| 4.57E-74  | 0.391642664 | 0.753 | 0.498 | 8.52E-70  | 0       | ANAPC16    |
| 1.17E-71  | 0.472426229 | 0.637 | 0.372 | 2.18E-67  | 0       | GLO1       |
| 2.71E-70  | 0.367093791 | 0.907 | 0.71  | 5.06E-66  | 0       | SRSF5      |
| 5.12E-70  | 0.38945183  | 0.586 | 0.334 | 9.55E-66  | 0       | FAM96A     |
| 6.06E-70  | 0.35883098  | 0.94  | 0.769 | 1.13E-65  | 0       | PEBP1      |
| 4.53E-69  | 0.443435916 | 0.945 | 0.794 | 8.45E-65  | 0       | HLA-DMA    |
| 5.74E-69  | 0.383680785 | 0.831 | 0.62  | 1.07E-64  | 0       | GABARAP    |
| 9.06E-69  | 0.348463372 | 0.981 | 0.869 | 1.69E-64  | 0       | ATP5F1E    |
| 3.18E-65  | 0.328537901 | 0.288 | 0.073 | 5.93E-61  | 0       | LINC02422  |
| 1.67E-64  | 0.366986817 | 0.681 | 0.415 | 3.11E-60  | 0       | POU2AF1    |
| 2.05E-64  | 0.407255504 | 0.445 | 0.2   | 3.83E-60  | 0       | FMOD       |
| 1.57E-63  | 0.31706392  | 0.967 | 0.846 | 2.92E-59  | 0       | COX7C      |
| 7.29E-63  | 0.395250535 | 0.638 | 0.401 | 1.36E-58  | 0       | BRK1       |
| 1.12E-62  | 0.308068896 | 0.873 | 0.694 | 2.08E-58  | 0       | RPL36A     |
| 2.32E-62  | 0.336781579 | 0.626 | 0.397 | 4.33E-58  | 0       | POLD4      |
| 3.07E-56  | 0.308335999 | 0.879 | 0.652 | 5.72E-52  | 0       | FCER2      |
| 1.58E-54  | 0.346856764 | 0.791 | 0.574 | 2.94E-50  | 0       | GPSM3      |
| 2.03E-54  | 0.355820034 | 0.948 | 0.781 | 3.78E-50  | 0       | ATP5MC2    |
| 4.37E-54  | 0.334460533 | 0.568 | 0.341 | 8.15E-50  | 0       | TRAPPC1    |
| 1.27E-53  | 0.400820012 | 0.824 | 0.622 | 2.37E-49  | 0       | LTB        |
| 3.11E-53  | 0.353573589 | 0.554 | 0.328 | 5.79E-49  | 0       | LSM2       |

|          |             |       |       |          |   |           |
|----------|-------------|-------|-------|----------|---|-----------|
| 4.06E-53 | 0.526010046 | 0.429 | 0.21  | 7.57E-49 | 0 | IFITM1    |
| 7.32E-53 | 0.304593713 | 0.621 | 0.402 | 1.37E-48 | 0 | LINC01857 |
| 7.30E-52 | 0.336623163 | 0.911 | 0.744 | 1.36E-47 | 0 | CYBA      |
| 3.21E-51 | 0.339329368 | 0.784 | 0.557 | 5.99E-47 | 0 | CD27      |
| 3.80E-51 | 0.336143098 | 0.461 | 0.253 | 7.08E-47 | 0 | PNOC      |
| 7.51E-51 | 0.295469176 | 0.535 | 0.323 | 1.40E-46 | 0 | SHISA5    |
| 1.45E-50 | 0.27586241  | 0.945 | 0.796 | 2.71E-46 | 0 | ARHGDIB   |
| 4.47E-50 | 0.357338871 | 0.507 | 0.292 | 8.33E-46 | 0 | PTRHD1    |
| 5.01E-49 | 0.288911055 | 0.769 | 0.588 | 9.33E-45 | 0 | RNASET2   |
| 2.06E-48 | 0.308031995 | 0.972 | 0.834 | 3.84E-44 | 0 | TOMM7     |
| 6.28E-48 | 0.280603518 | 0.657 | 0.442 | 1.17E-43 | 0 | CSK       |
| 1.19E-47 | 0.250030912 | 0.758 | 0.525 | 2.22E-43 | 0 | EVL       |
| 1.54E-47 | 0.254822682 | 0.307 | 0.131 | 2.87E-43 | 0 | ITGAE     |
| 1.87E-47 | 0.273714533 | 0.711 | 0.508 | 3.49E-43 | 0 | CUTA      |
| 5.26E-47 | 0.260228113 | 0.938 | 0.815 | 9.81E-43 | 0 | PCBP2     |
| 6.42E-47 | 0.261273379 | 0.469 | 0.273 | 1.20E-42 | 0 | REX1BD    |
| 1.97E-46 | 0.295531755 | 0.639 | 0.413 | 3.67E-42 | 0 | LAMTOR4   |
| 2.29E-46 | 0.353906828 | 0.665 | 0.436 | 4.26E-42 | 0 | IFITM2    |
| 2.36E-46 | 0.325716658 | 0.691 | 0.476 | 4.40E-42 | 0 | AES       |
| 1.02E-45 | 0.299081528 | 0.826 | 0.643 | 1.89E-41 | 0 | CD48      |
| 3.99E-45 | 0.303686398 | 0.647 | 0.439 | 7.44E-41 | 0 | CCND3     |
| 4.04E-45 | 0.271213038 | 0.771 | 0.57  | 7.53E-41 | 0 | CYB561A3  |
| 6.25E-44 | 0.291548226 | 0.451 | 0.225 | 1.17E-39 | 0 | TNFRSF13B |
| 7.07E-44 | 0.570328529 | 0.206 | 0.05  | 1.32E-39 | 0 | APOD      |
| 1.09E-43 | 0.256877243 | 0.54  | 0.357 | 2.03E-39 | 0 | ABHD14B   |
| 2.20E-43 | 0.264844093 | 0.662 | 0.473 | 4.11E-39 | 0 | PSMB9     |
| 2.20E-43 | 0.39614653  | 0.446 | 0.235 | 4.11E-39 | 0 | C16orf74  |
| 7.53E-43 | 0.257510923 | 0.943 | 0.809 | 1.40E-38 | 0 | ARPC3     |
| 7.57E-43 | 0.266588913 | 0.724 | 0.536 | 1.41E-38 | 0 | DRAP1     |
| 1.48E-42 | 0.253780351 | 0.575 | 0.335 | 2.76E-38 | 0 | KIAA0040  |
| 1.56E-42 | 0.27978188  | 0.402 | 0.214 | 2.91E-38 | 0 | C1orf162  |
| 1.58E-42 | 0.254830004 | 0.577 | 0.357 | 2.95E-38 | 0 | CCDC191   |
| 2.02E-42 | 0.261515926 | 0.537 | 0.346 | 3.76E-38 | 0 | PTPRCAP   |
| 2.05E-42 | 0.265998301 | 0.713 | 0.5   | 3.83E-38 | 0 | ATP5IF1   |
| 3.03E-40 | 0.514289508 | 0.242 | 0.085 | 5.65E-36 | 0 | BCL2L1    |
| 4.13E-40 | 0.25758195  | 0.94  | 0.817 | 7.70E-36 | 0 | LIMD2     |
| 5.33E-39 | 0.314157747 | 0.489 | 0.291 | 9.93E-35 | 0 | NAPSA     |
| 6.91E-39 | 0.285601687 | 0.362 | 0.163 | 1.29E-34 | 0 | LCK       |
| 1.18E-37 | 0.264187171 | 0.545 | 0.355 | 2.20E-33 | 0 | FLOT2     |
| 1.01E-36 | 0.277199561 | 0.951 | 0.811 | 1.88E-32 | 0 | NOP53     |
| 7.14E-36 | 0.30660501  | 0.344 | 0.182 | 1.33E-31 | 0 | SERPINF1  |
| 1.83E-35 | 0.257636437 | 0.503 | 0.306 | 3.40E-31 | 0 | NEDD8     |
| 1.02E-34 | 0.272140427 | 0.742 | 0.566 | 1.90E-30 | 0 | EIF3G     |
| 2.85E-34 | 0.271460824 | 0.549 | 0.353 | 5.32E-30 | 0 | YPEL3     |
| 4.17E-34 | 0.293746159 | 0.398 | 0.213 | 7.77E-30 | 0 | VPREB3    |
| 4.68E-33 | 0.28917967  | 0.324 | 0.168 | 8.73E-29 | 0 | FAM30A    |

|          |             |       |       |          |   |            |
|----------|-------------|-------|-------|----------|---|------------|
| 7.40E-33 | 0.256260324 | 0.77  | 0.608 | 1.38E-28 | 0 | EIF3E      |
| 1.41E-24 | 0.324317943 | 0.619 | 0.474 | 2.62E-20 | 0 | IGLL5      |
| 1.79E-90 | 0.546168924 | 0.825 | 0.547 | 3.34E-86 | 1 | RPS4Y1     |
| 2.48E-88 | 0.469204782 | 0.914 | 0.774 | 4.62E-84 | 1 | PEBP1      |
| 6.00E-83 | 0.969173603 | 0.618 | 0.404 | 1.12E-78 | 1 | LINC01857  |
| 4.66E-77 | 0.313912816 | 0.927 | 0.723 | 8.69E-73 | 1 | JUN        |
| 3.57E-72 | 0.462754275 | 0.349 | 0.132 | 6.66E-68 | 1 | PTPN18     |
| 2.17E-69 | 0.371002569 | 0.763 | 0.538 | 4.04E-65 | 1 | FCRLA      |
| 2.68E-65 | 0.36355215  | 0.891 | 0.711 | 4.99E-61 | 1 | NCF1       |
| 1.71E-63 | 0.40942192  | 0.833 | 0.623 | 3.18E-59 | 1 | LTB        |
| 1.31E-58 | 0.42382674  | 0.352 | 0.149 | 2.45E-54 | 1 | AL928742.1 |
| 4.43E-58 | 0.48168141  | 0.726 | 0.533 | 8.26E-54 | 1 | CXXC5      |
| 6.05E-58 | 0.381055692 | 0.759 | 0.572 | 1.13E-53 | 1 | SMARCB1    |
| 3.99E-57 | 0.355516148 | 0.842 | 0.659 | 7.44E-53 | 1 | FCER2      |
| 8.54E-54 | 0.40550504  | 0.65  | 0.422 | 1.59E-49 | 1 | POU2AF1    |
| 1.43E-53 | 0.367935285 | 0.464 | 0.23  | 2.67E-49 | 1 | AC243960.1 |
| 4.04E-53 | 0.398488194 | 0.318 | 0.129 | 7.54E-49 | 1 | CLLU1OS    |
| 6.47E-52 | 0.325793515 | 0.926 | 0.809 | 1.21E-47 | 1 | PNRC1      |
| 1.32E-49 | 0.292546441 | 0.95  | 0.827 | 2.46E-45 | 1 | FCMR       |
| 4.44E-49 | 0.595113473 | 0.487 | 0.28  | 8.28E-45 | 1 | PLAC8      |
| 1.17E-47 | 0.403275207 | 0.561 | 0.362 | 2.18E-43 | 1 | HCST       |
| 1.54E-47 | 0.270970847 | 0.864 | 0.716 | 2.87E-43 | 1 | ERP29      |
| 2.04E-47 | 0.287820277 | 0.737 | 0.53  | 3.80E-43 | 1 | EVL        |
| 1.63E-45 | 0.293252402 | 0.875 | 0.735 | 3.04E-41 | 1 | Sep-09     |
| 1.50E-44 | 0.260059904 | 0.774 | 0.598 | 2.80E-40 | 1 | TSTD1      |
| 8.87E-44 | 0.368529931 | 0.757 | 0.563 | 1.65E-39 | 1 | CD27       |
| 1.40E-43 | 0.410256825 | 0.422 | 0.26  | 2.61E-39 | 1 | PIGR       |
| 2.68E-43 | 0.275052681 | 0.963 | 0.836 | 4.99E-39 | 1 | TOMM7      |
| 2.50E-42 | 0.314546549 | 0.618 | 0.444 | 4.67E-38 | 1 | CCND3      |
| 1.04E-41 | 0.274077113 | 0.712 | 0.521 | 1.93E-37 | 1 | GMFG       |
| 1.43E-41 | 0.319116303 | 0.75  | 0.581 | 2.67E-37 | 1 | GPSM3      |
| 1.53E-41 | 0.324738987 | 0.764 | 0.63  | 2.85E-37 | 1 | NOSIP      |
| 4.85E-41 | 0.37056573  | 0.451 | 0.266 | 9.05E-37 | 1 | RGS1       |
| 9.53E-41 | 0.321362676 | 0.328 | 0.155 | 1.78E-36 | 1 | EAF2       |
| 1.02E-40 | 0.34147104  | 0.369 | 0.2   | 1.89E-36 | 1 | CPNE5      |
| 9.04E-40 | 0.289255887 | 0.746 | 0.575 | 1.69E-35 | 1 | CYB561A3   |
| 2.01E-39 | 0.31119985  | 0.424 | 0.241 | 3.75E-35 | 1 | GYPC       |
| 2.36E-39 | 0.336642402 | 0.927 | 0.774 | 4.40E-35 | 1 | TXNIP      |
| 2.83E-37 | 0.324177653 | 0.46  | 0.293 | 5.28E-33 | 1 | VAMP5      |
| 5.47E-33 | 0.373763093 | 0.61  | 0.478 | 1.02E-28 | 1 | SELL       |
| 2.13E-32 | 0.252721407 | 0.671 | 0.459 | 3.97E-28 | 1 | TCL1A      |
| 1.06E-31 | 0.909687483 | 0.187 | 0.07  | 1.98E-27 | 1 | CHI3L2     |
| 2.63E-31 | 0.323692337 | 0.367 | 0.214 | 4.89E-27 | 1 | ATP2B1-AS1 |
| 3.95E-31 | 0.250539654 | 0.679 | 0.521 | 7.36E-27 | 1 | SMDT1      |
| 7.91E-31 | 0.410086118 | 0.436 | 0.292 | 1.47E-26 | 1 | H1FX       |
| 1.14E-29 | 0.287029224 | 0.579 | 0.397 | 2.13E-25 | 1 | KLF2       |

|           |             |       |       |           |   |            |
|-----------|-------------|-------|-------|-----------|---|------------|
| 6.49E-25  | 0.252469447 | 0.426 | 0.276 | 1.21E-20  | 1 | PLEKHJ1    |
| 2.15E-24  | 0.304997278 | 0.755 | 0.617 | 4.00E-20  | 1 | DBI        |
| 1.08E-22  | 0.253740822 | 0.601 | 0.43  | 2.01E-18  | 1 | CD19       |
| 7.50E-20  | 0.252871618 | 0.756 | 0.633 | 1.40E-15  | 1 | HLA-DMB    |
| 4.02E-181 | 1.223183251 | 0.834 | 0.482 | 7.50E-177 | 2 | RGCC       |
| 4.33E-140 | 0.543796933 | 0.87  | 0.491 | 8.07E-136 | 2 | NR4A2      |
| 2.21E-139 | 0.617425653 | 0.934 | 0.715 | 4.12E-135 | 2 | YPEL5      |
| 1.12E-136 | 0.783425319 | 0.784 | 0.394 | 2.08E-132 | 2 | ZNF331     |
| 7.05E-121 | 0.611682906 | 0.961 | 0.837 | 1.31E-116 | 2 | SH3BGRL3   |
| 3.07E-120 | 0.525669935 | 0.792 | 0.447 | 5.72E-116 | 2 | GPR183     |
| 2.90E-115 | 0.267996734 | 0.932 | 0.656 | 5.41E-111 | 2 | CD83       |
| 6.68E-115 | 0.658248612 | 0.875 | 0.669 | 1.25E-110 | 2 | ATP6V0C    |
| 1.69E-111 | 0.861726134 | 0.84  | 0.621 | 3.15E-107 | 2 | S100A4     |
| 5.00E-108 | 0.490571138 | 0.964 | 0.817 | 9.32E-104 | 2 | JUNB       |
| 5.15E-108 | 0.671716903 | 0.95  | 0.845 | 9.60E-104 | 2 | KLF6       |
| 1.36E-105 | 0.319868715 | 0.831 | 0.519 | 2.54E-101 | 2 | DUSP2      |
| 5.24E-102 | 0.306977778 | 0.879 | 0.658 | 9.77E-98  | 2 | CD69       |
| 1.13E-88  | 0.568274886 | 0.564 | 0.286 | 2.11E-84  | 2 | AC020916.1 |
| 4.67E-88  | 0.522042343 | 0.918 | 0.774 | 8.71E-84  | 2 | HSPA8      |
| 6.94E-88  | 0.586138351 | 0.734 | 0.474 | 1.29E-83  | 2 | SELENOK    |
| 1.16E-80  | 0.544611838 | 0.651 | 0.394 | 2.16E-76  | 2 | GTF2B      |
| 2.05E-75  | 0.499208745 | 0.798 | 0.612 | 3.82E-71  | 2 | HIGD2A     |
| 2.40E-74  | 0.524946738 | 0.693 | 0.449 | 4.48E-70  | 2 | CXCR5      |
| 1.21E-70  | 0.573946023 | 0.664 | 0.45  | 2.26E-66  | 2 | CAPG       |
| 3.86E-70  | 0.497598114 | 0.855 | 0.702 | 7.20E-66  | 2 | COTL1      |
| 3.69E-68  | 0.429252031 | 0.958 | 0.84  | 6.88E-64  | 2 | GAPDH      |
| 9.00E-68  | 0.371498354 | 0.48  | 0.205 | 1.68E-63  | 2 | EGR1       |
| 7.09E-67  | 0.415600427 | 0.928 | 0.789 | 1.32E-62  | 2 | ATP5MC2    |
| 7.24E-67  | 0.469291908 | 0.368 | 0.142 | 1.35E-62  | 2 | DUSP4      |
| 4.30E-66  | 0.439652544 | 0.712 | 0.507 | 8.02E-62  | 2 | CRIP1      |
| 7.31E-65  | 0.449177697 | 0.861 | 0.705 | 1.36E-60  | 2 | CLIC1      |
| 2.26E-64  | 0.404044646 | 0.863 | 0.693 | 4.21E-60  | 2 | RAC2       |
| 1.10E-61  | 0.491414247 | 0.734 | 0.551 | 2.05E-57  | 2 | G3BP2      |
| 1.87E-61  | 0.369220846 | 0.88  | 0.748 | 3.48E-57  | 2 | SNRPD2     |
| 4.35E-61  | 0.434516552 | 0.914 | 0.779 | 8.10E-57  | 2 | PPDPF      |
| 1.02E-60  | 0.414781912 | 0.6   | 0.393 | 1.91E-56  | 2 | CSRNP1     |
| 2.72E-59  | 0.716715031 | 0.473 | 0.252 | 5.07E-55  | 2 | SLC2A3     |
| 1.46E-52  | 0.45043592  | 0.733 | 0.536 | 2.72E-48  | 2 | HSPA5      |
| 1.99E-52  | 0.339792197 | 0.886 | 0.774 | 3.70E-48  | 2 | EIF3F      |
| 5.02E-51  | 0.539768289 | 0.228 | 0.062 | 9.36E-47  | 2 | ARL4D      |
| 6.08E-51  | 0.369703231 | 0.312 | 0.128 | 1.13E-46  | 2 | MYADM      |
| 8.35E-49  | 0.367008735 | 0.904 | 0.778 | 1.56E-44  | 2 | FXVD5      |
| 2.09E-48  | 0.355666386 | 0.942 | 0.835 | 3.89E-44  | 2 | RPL36AL    |
| 6.47E-48  | 0.398162317 | 0.913 | 0.794 | 1.21E-43  | 2 | S100A6     |
| 3.06E-46  | 0.302237813 | 0.923 | 0.811 | 5.71E-42  | 2 | HINT1      |
| 3.01E-45  | 0.253821599 | 0.941 | 0.826 | 5.60E-41  | 2 | BTG2       |

|          |             |       |       |          |   |           |
|----------|-------------|-------|-------|----------|---|-----------|
| 2.06E-44 | 0.360694975 | 0.635 | 0.429 | 3.85E-40 | 2 | KLF10     |
| 2.38E-43 | 0.384642049 | 0.759 | 0.598 | 4.44E-39 | 2 | C12orf57  |
| 7.45E-43 | 0.293883936 | 0.868 | 0.738 | 1.39E-38 | 2 | TMA7      |
| 1.03E-41 | 0.328154017 | 0.932 | 0.832 | 1.92E-37 | 2 | SLC25A6   |
| 1.34E-40 | 0.38136529  | 0.678 | 0.525 | 2.50E-36 | 2 | SMDT1     |
| 1.71E-40 | 0.362123772 | 0.847 | 0.715 | 3.18E-36 | 2 | EIF3K     |
| 2.80E-40 | 0.381469142 | 0.297 | 0.14  | 5.22E-36 | 2 | DUSP5     |
| 8.88E-40 | 0.38051767  | 0.795 | 0.652 | 1.65E-35 | 2 | CD48      |
| 9.45E-40 | 0.343629635 | 0.853 | 0.72  | 1.76E-35 | 2 | ERP29     |
| 4.57E-39 | 0.340011564 | 0.48  | 0.291 | 8.51E-35 | 2 | PTMS      |
| 1.58E-38 | 0.326196479 | 0.766 | 0.632 | 2.94E-34 | 2 | SSR2      |
| 3.68E-38 | 0.323367359 | 0.422 | 0.262 | 6.86E-34 | 2 | IGFLR1    |
| 1.66E-37 | 0.296361302 | 0.432 | 0.271 | 3.09E-33 | 2 | ARL4A     |
| 2.38E-37 | 0.360113709 | 0.585 | 0.401 | 4.43E-33 | 2 | KLF2      |
| 3.78E-37 | 0.352430426 | 0.695 | 0.518 | 7.05E-33 | 2 | LGALS1    |
| 1.52E-36 | 0.307216997 | 0.898 | 0.788 | 2.83E-32 | 2 | YBX1      |
| 1.72E-36 | 0.317445208 | 0.705 | 0.549 | 3.21E-32 | 2 | FCRLA     |
| 1.61E-35 | 0.354081107 | 0.573 | 0.384 | 3.00E-31 | 2 | TENT5C    |
| 2.36E-35 | 0.25907444  | 0.708 | 0.54  | 4.41E-31 | 2 | RAB11FIP1 |
| 3.39E-35 | 0.250177066 | 0.51  | 0.303 | 6.31E-31 | 2 | RASGEF1B  |
| 6.70E-35 | 0.351609475 | 0.769 | 0.615 | 1.25E-30 | 2 | CNN2      |
| 2.12E-34 | 0.323416141 | 0.865 | 0.737 | 3.95E-30 | 2 | COMMD6    |
| 3.78E-34 | 0.361755709 | 0.654 | 0.503 | 7.06E-30 | 2 | CHCHD10   |
| 1.86E-33 | 0.302119857 | 0.793 | 0.685 | 3.47E-29 | 2 | PPIB      |
| 2.46E-33 | 0.47408779  | 0.486 | 0.297 | 4.59E-29 | 2 | ATF5      |
| 2.55E-33 | 0.318872037 | 0.658 | 0.497 | 4.76E-29 | 2 | SBDS      |
| 9.78E-33 | 0.279764538 | 0.747 | 0.633 | 1.82E-28 | 2 | ANXA11    |
| 1.64E-32 | 0.351368863 | 0.68  | 0.531 | 3.06E-28 | 2 | NDUFB11   |
| 8.21E-32 | 0.335749993 | 0.757 | 0.613 | 1.53E-27 | 2 | SLC25A5   |
| 8.65E-30 | 0.286179108 | 0.41  | 0.246 | 1.61E-25 | 2 | FAM53C    |
| 2.50E-29 | 0.314246594 | 0.47  | 0.302 | 4.67E-25 | 2 | OSER1     |
| 2.59E-29 | 0.276886573 | 0.346 | 0.208 | 4.83E-25 | 2 | GM2A      |
| 6.37E-29 | 0.250502581 | 0.657 | 0.513 | 1.19E-24 | 2 | CYCS      |
| 8.75E-29 | 0.260231038 | 0.73  | 0.617 | 1.63E-24 | 2 | EIF3E     |
| 3.80E-28 | 0.322278478 | 0.62  | 0.472 | 7.07E-24 | 2 | C9orf16   |
| 7.70E-28 | 0.304438524 | 0.392 | 0.24  | 1.44E-23 | 2 | TP53I11   |
| 2.48E-27 | 0.262457157 | 0.662 | 0.548 | 4.63E-23 | 2 | DRAP1     |
| 7.56E-27 | 0.295412494 | 0.574 | 0.429 | 1.41E-22 | 2 | LY6E      |
| 1.73E-26 | 0.253186346 | 0.721 | 0.581 | 3.23E-22 | 2 | CYTIP     |
| 1.73E-25 | 0.298250495 | 0.547 | 0.405 | 3.23E-21 | 2 | TSPO      |
| 2.73E-25 | 0.300028433 | 0.461 | 0.296 | 5.09E-21 | 2 | SERTAD1   |
| 6.17E-25 | 0.260881804 | 0.647 | 0.52  | 1.15E-20 | 2 | CUTA      |
| 1.04E-24 | 0.268071569 | 0.506 | 0.373 | 1.94E-20 | 2 | SHMT2     |
| 2.09E-24 | 0.296311236 | 0.613 | 0.485 | 3.90E-20 | 2 | RNH1      |
| 4.24E-23 | 0.264184528 | 0.614 | 0.501 | 7.91E-19 | 2 | UQCR11    |
| 2.24E-22 | 0.283904929 | 0.461 | 0.329 | 4.18E-18 | 2 | ALKBH7    |

|           |             |       |       |           |   |           |
|-----------|-------------|-------|-------|-----------|---|-----------|
| 2.55E-21  | 0.257894988 | 0.794 | 0.678 | 4.76E-17  | 2 | SERP1     |
| 5.55E-20  | 0.261420219 | 0.472 | 0.354 | 1.03E-15  | 2 | FCGRT     |
| 0         | 1.871198443 | 0.957 | 0.433 | 0         | 3 | LMNA      |
| 0         | 1.816139334 | 0.98  | 0.578 | 0         | 3 | ID3       |
| 0         | 1.788764059 | 0.999 | 0.796 | 0         | 3 | CXCR4     |
| 0         | 1.495993767 | 0.97  | 0.73  | 0         | 3 | HIST1H4C  |
| 0         | 1.409016188 | 0.999 | 0.869 | 0         | 3 | EZR       |
| 0         | 1.295587767 | 0.991 | 0.659 | 0         | 3 | CD55      |
| 0         | 1.279444132 | 0.673 | 0.095 | 0         | 3 | GABARAPL1 |
| 0         | 1.215562037 | 0.928 | 0.416 | 0         | 3 | CDKN1A    |
| 0         | 1.102625678 | 0.996 | 0.786 | 0         | 3 | TAGLN2    |
| 0         | 1.030640292 | 0.989 | 0.788 | 0         | 3 | SARAF     |
| 3.86E-300 | 1.407700473 | 0.916 | 0.529 | 7.20E-296 | 3 | ODC1      |
| 5.27E-298 | 1.76279423  | 0.873 | 0.44  | 9.83E-294 | 3 | GPR183    |
| 1.80E-289 | 1.043263537 | 0.756 | 0.269 | 3.36E-285 | 3 | RARA      |
| 3.71E-276 | 1.003811935 | 0.94  | 0.596 | 6.92E-272 | 3 | LRRFIP1   |
| 4.04E-272 | 1.315707273 | 0.897 | 0.494 | 7.53E-268 | 3 | S100A10   |
| 1.45E-271 | 1.332971251 | 0.671 | 0.15  | 2.70E-267 | 3 | KLF3      |
| 2.15E-270 | 1.15051713  | 0.662 | 0.172 | 4.00E-266 | 3 | TUBB6     |
| 2.12E-258 | 1.128084739 | 0.824 | 0.361 | 3.96E-254 | 3 | SYAP1     |
| 2.83E-258 | 1.035347778 | 0.86  | 0.435 | 5.28E-254 | 3 | TPM4      |
| 4.67E-256 | 1.066297831 | 0.962 | 0.707 | 8.70E-252 | 3 | SAT1      |
| 4.69E-250 | 0.977457974 | 0.895 | 0.458 | 8.75E-246 | 3 | TUBB4B    |
| 3.39E-247 | 0.947890554 | 0.937 | 0.613 | 6.32E-243 | 3 | PDE4B     |
| 9.08E-245 | 0.988088843 | 0.716 | 0.234 | 1.69E-240 | 3 | SKIL      |
| 6.70E-240 | 1.264396212 | 0.734 | 0.277 | 1.25E-235 | 3 | CREM      |
| 1.14E-239 | 1.042468922 | 0.676 | 0.204 | 2.12E-235 | 3 | SLC7A5    |
| 3.32E-237 | 0.770814261 | 0.974 | 0.765 | 6.19E-233 | 3 | SQSTM1    |
| 7.73E-237 | 0.866156656 | 0.994 | 0.834 | 1.44E-232 | 3 | ZFP36     |
| 6.14E-230 | 1.086971923 | 0.778 | 0.321 | 1.15E-225 | 3 | GNB5      |
| 1.94E-225 | 0.790980599 | 0.972 | 0.712 | 3.61E-221 | 3 | YPEL5     |
| 9.31E-224 | 0.925553911 | 0.935 | 0.658 | 1.73E-219 | 3 | TUBA1B    |
| 2.04E-219 | 0.932976597 | 0.986 | 0.822 | 3.80E-215 | 3 | BTG2      |
| 1.40E-215 | 0.925926547 | 0.622 | 0.19  | 2.60E-211 | 3 | SLC16A3   |
| 1.68E-215 | 1.155349988 | 0.887 | 0.58  | 3.13E-211 | 3 | ARID5B    |
| 1.94E-214 | 0.747480122 | 0.838 | 0.358 | 3.62E-210 | 3 | NR4A1     |
| 4.11E-208 | 0.946576323 | 0.983 | 0.856 | 7.67E-204 | 3 | UCP2      |
| 6.53E-208 | 0.902695265 | 0.594 | 0.146 | 1.22E-203 | 3 | ELL2      |
| 1.70E-206 | 0.826662436 | 0.713 | 0.312 | 3.17E-202 | 3 | FYTTD1    |
| 2.48E-203 | 1.327322337 | 0.408 | 0.025 | 4.63E-199 | 3 | ANGPT2    |
| 4.96E-198 | 0.91502401  | 0.833 | 0.474 | 9.24E-194 | 3 | RAP1B     |
| 8.44E-190 | 0.638045994 | 0.98  | 0.832 | 1.57E-185 | 3 | CALM1     |
| 2.08E-189 | 0.86428717  | 0.835 | 0.479 | 3.88E-185 | 3 | BIRC3     |
| 6.10E-184 | 1.225511189 | 0.461 | 0.068 | 1.14E-179 | 3 | ID1       |
| 6.45E-182 | 0.826325082 | 0.576 | 0.184 | 1.20E-177 | 3 | NDRG1     |
| 1.79E-181 | 0.856944203 | 0.942 | 0.662 | 3.33E-177 | 3 | EMP3      |

|           |             |       |       |           |   |          |
|-----------|-------------|-------|-------|-----------|---|----------|
| 2.46E-181 | 0.78577364  | 0.637 | 0.221 | 4.58E-177 | 3 | TYROBP   |
| 3.66E-177 | 0.889992297 | 0.755 | 0.37  | 6.83E-173 | 3 | TMEM123  |
| 8.77E-177 | 0.77704967  | 0.948 | 0.643 | 1.64E-172 | 3 | CCR7     |
| 1.14E-176 | 0.826381873 | 0.941 | 0.694 | 2.13E-172 | 3 | SRGN     |
| 1.42E-174 | 0.897560619 | 0.527 | 0.155 | 2.64E-170 | 3 | S1PR1    |
| 2.79E-174 | 0.825164373 | 0.698 | 0.301 | 5.20E-170 | 3 | PAK1     |
| 1.54E-173 | 0.847585045 | 0.835 | 0.416 | 2.88E-169 | 3 | RGS2     |
| 1.65E-173 | 0.84549237  | 0.988 | 0.815 | 3.07E-169 | 3 | JUNB     |
| 1.78E-172 | 0.935024479 | 0.796 | 0.46  | 3.31E-168 | 3 | TUBA4A   |
| 1.61E-171 | 0.932670176 | 0.777 | 0.415 | 3.00E-167 | 3 | IDI1     |
| 1.14E-170 | 0.665322946 | 0.95  | 0.697 | 2.13E-166 | 3 | CALM2    |
| 3.22E-170 | 0.753147874 | 0.623 | 0.25  | 6.01E-166 | 3 | CYSTM1   |
| 2.09E-169 | 0.838821486 | 0.719 | 0.379 | 3.90E-165 | 3 | COL9A3   |
| 3.90E-168 | 0.752025116 | 0.66  | 0.252 | 7.28E-164 | 3 | GLUL     |
| 1.19E-163 | 0.983769004 | 0.677 | 0.297 | 2.22E-159 | 3 | LDLRAD4  |
| 1.35E-163 | 0.782665556 | 0.697 | 0.306 | 2.52E-159 | 3 | S100A11  |
| 2.89E-163 | 0.738346268 | 0.478 | 0.123 | 5.39E-159 | 3 | OAT      |
| 1.05E-162 | 0.798439921 | 0.783 | 0.452 | 1.97E-158 | 3 | RNF41    |
| 6.66E-158 | 0.841926861 | 0.745 | 0.404 | 1.24E-153 | 3 | CD63     |
| 1.27E-155 | 0.678854452 | 0.506 | 0.144 | 2.37E-151 | 3 | SNED1    |
| 1.08E-154 | 1.043337631 | 0.654 | 0.286 | 2.02E-150 | 3 | MAP2K3   |
| 2.78E-152 | 0.692827837 | 0.71  | 0.389 | 5.19E-148 | 3 | LDHA     |
| 7.06E-151 | 0.777781254 | 0.726 | 0.392 | 1.32E-146 | 3 | SLC3A2   |
| 2.26E-150 | 0.798566602 | 0.773 | 0.461 | 4.22E-146 | 3 | H2AFZ    |
| 8.72E-148 | 0.862289299 | 0.777 | 0.414 | 1.63E-143 | 3 | ADGRE5   |
| 6.61E-147 | 0.708739701 | 0.852 | 0.545 | 1.23E-142 | 3 | DYNLL1   |
| 5.91E-145 | 0.716077268 | 0.899 | 0.637 | 1.10E-140 | 3 | TUBA1A   |
| 4.77E-143 | 0.687781311 | 0.447 | 0.104 | 8.89E-139 | 3 | PARD6A   |
| 1.04E-140 | 0.705386093 | 0.67  | 0.32  | 1.93E-136 | 3 | ISCA1    |
| 3.84E-140 | 0.56893628  | 0.908 | 0.609 | 7.16E-136 | 3 | HERPUD1  |
| 1.94E-138 | 0.864917118 | 0.296 | 0.017 | 3.61E-134 | 3 | BDKRB2   |
| 2.81E-134 | 0.831971085 | 0.816 | 0.561 | 5.23E-130 | 3 | ISG20    |
| 4.48E-133 | 0.662757932 | 0.42  | 0.121 | 8.35E-129 | 3 | C15orf39 |
| 2.17E-132 | 0.79528594  | 0.482 | 0.146 | 4.05E-128 | 3 | CRIP2    |
| 4.37E-132 | 0.627570599 | 0.68  | 0.344 | 8.14E-128 | 3 | NFE2L2   |
| 5.89E-132 | 0.588269769 | 0.735 | 0.438 | 1.10E-127 | 3 | STRAP    |
| 4.17E-131 | 0.508283047 | 0.874 | 0.64  | 7.77E-127 | 3 | CHD2     |
| 1.28E-130 | 0.656419464 | 0.602 | 0.27  | 2.39E-126 | 3 | ARID5A   |
| 2.24E-129 | 0.596925323 | 0.67  | 0.353 | 4.18E-125 | 3 | CSNK1D   |
| 3.27E-129 | 0.627214656 | 0.63  | 0.282 | 6.10E-125 | 3 | SERTAD1  |
| 1.64E-128 | 0.610631121 | 0.636 | 0.322 | 3.05E-124 | 3 | SLBP     |
| 6.72E-128 | 0.564629513 | 0.603 | 0.306 | 1.25E-123 | 3 | STX5     |
| 9.93E-125 | 0.686676318 | 0.585 | 0.251 | 1.85E-120 | 3 | USP36    |
| 1.79E-122 | 0.694517876 | 0.772 | 0.468 | 3.34E-118 | 3 | KRAS     |
| 3.91E-122 | 0.572470047 | 0.838 | 0.558 | 7.28E-118 | 3 | UBE2B    |
| 2.25E-119 | 0.654921302 | 0.552 | 0.221 | 4.19E-115 | 3 | BCL2L11  |



|           |             |       |       |           |   |          |
|-----------|-------------|-------|-------|-----------|---|----------|
| 1.58E-118 | 0.649370426 | 0.59  | 0.267 | 2.94E-114 | 3 | TIPARP   |
| 3.88E-118 | 0.590178295 | 0.434 | 0.111 | 7.24E-114 | 3 | SIK2     |
| 6.33E-118 | 0.635191441 | 0.739 | 0.44  | 1.18E-113 | 3 | EIF1AX   |
| 1.85E-117 | 0.498926193 | 0.802 | 0.531 | 3.45E-113 | 3 | SSH2     |
| 2.86E-117 | 0.578271182 | 0.311 | 0.054 | 5.34E-113 | 3 | VPS37B   |
| 3.18E-117 | 0.673861021 | 0.693 | 0.367 | 5.92E-113 | 3 | RIPOR1   |
| 9.46E-116 | 0.753111645 | 0.593 | 0.287 | 1.76E-111 | 3 | ATP1B3   |
| 2.35E-115 | 0.507981111 | 0.955 | 0.769 | 4.38E-111 | 3 | NCL      |
| 3.38E-115 | 0.527362057 | 0.677 | 0.405 | 6.31E-111 | 3 | NR1H2    |
| 4.58E-114 | 0.57472487  | 0.629 | 0.34  | 8.55E-110 | 3 | ATP6V0D1 |
| 6.25E-114 | 0.590749352 | 0.342 | 0.073 | 1.17E-109 | 3 | LGMN     |
| 4.57E-113 | 0.707372388 | 0.769 | 0.481 | 8.52E-109 | 3 | TNFRSF1B |
| 2.00E-112 | 0.715396123 | 0.696 | 0.399 | 3.73E-108 | 3 | TGFB1    |
| 1.08E-111 | 0.513180171 | 0.855 | 0.614 | 2.01E-107 | 3 | ATP5F1B  |
| 4.08E-111 | 0.619057129 | 0.575 | 0.263 | 7.61E-107 | 3 | IVNS1ABP |
| 4.26E-109 | 0.846943931 | 0.916 | 0.722 | 7.94E-105 | 3 | ZFP36L2  |
| 4.65E-109 | 0.659408905 | 0.782 | 0.526 | 8.67E-105 | 3 | AGPAT5   |
| 8.03E-109 | 0.65703944  | 0.612 | 0.328 | 1.50E-104 | 3 | RASSF5   |
| 1.69E-108 | 0.697220326 | 0.491 | 0.18  | 3.15E-104 | 3 | SC5D     |
| 6.07E-106 | 0.62958711  | 0.347 | 0.089 | 1.13E-101 | 3 | ATP1B1   |
| 1.36E-105 | 0.558929058 | 0.576 | 0.292 | 2.54E-101 | 3 | PLK3     |
| 9.41E-105 | 0.676206262 | 0.625 | 0.319 | 1.75E-100 | 3 | SERPINB9 |
| 1.79E-104 | 0.544514055 | 0.736 | 0.445 | 3.33E-100 | 3 | AMD1     |
| 6.46E-104 | 0.689935466 | 0.591 | 0.285 | 1.20E-99  | 3 | MAD1L1   |
| 7.75E-104 | 0.511635571 | 0.665 | 0.338 | 1.44E-99  | 3 | KDM6B    |
| 1.94E-103 | 0.505247565 | 0.272 | 0.047 | 3.61E-99  | 3 | PNMA2    |
| 3.83E-103 | 0.535339065 | 0.832 | 0.587 | 7.13E-99  | 3 | SPOCK2   |
| 4.91E-102 | 0.460600626 | 0.763 | 0.497 | 9.15E-98  | 3 | GPBP1    |
| 1.50E-101 | 0.588548847 | 0.509 | 0.215 | 2.80E-97  | 3 | SGTA     |
| 3.12E-101 | 0.482800425 | 0.642 | 0.362 | 5.81E-97  | 3 | CHD1     |
| 9.72E-101 | 0.548231658 | 0.429 | 0.152 | 1.81E-96  | 3 | GPR132   |
| 2.24E-100 | 0.573023479 | 0.649 | 0.36  | 4.17E-96  | 3 | USP11    |
| 3.90E-100 | 0.48132179  | 0.905 | 0.709 | 7.27E-96  | 3 | TMBIM6   |
| 2.74E-99  | 0.536166752 | 0.353 | 0.095 | 5.11E-95  | 3 | PLEKHG2  |
| 4.40E-99  | 0.405510615 | 0.863 | 0.612 | 8.20E-95  | 3 | PMAIP1   |
| 4.61E-98  | 0.594528078 | 0.824 | 0.585 | 8.60E-94  | 3 | SYNE2    |
| 4.86E-98  | 0.549236398 | 0.626 | 0.345 | 9.05E-94  | 3 | SINHCAF  |
| 1.43E-97  | 0.648762001 | 0.741 | 0.398 | 2.66E-93  | 3 | ZNF331   |
| 2.03E-97  | 0.548076413 | 0.632 | 0.347 | 3.79E-93  | 3 | ELF2     |
| 6.27E-97  | 0.542727649 | 0.48  | 0.198 | 1.17E-92  | 3 | ABCG1    |
| 2.71E-96  | 0.462494762 | 0.538 | 0.243 | 5.05E-92  | 3 | AH1      |
| 5.53E-96  | 0.480401514 | 0.575 | 0.294 | 1.03E-91  | 3 | ITPR2    |
| 5.86E-95  | 0.515673459 | 0.685 | 0.371 | 1.09E-90  | 3 | PIM3     |
| 1.20E-94  | 0.430453894 | 0.665 | 0.39  | 2.25E-90  | 3 | SLC38A2  |
| 2.51E-94  | 0.487008775 | 0.654 | 0.373 | 4.68E-90  | 3 | ADK      |
| 2.98E-94  | 0.641157236 | 0.245 | 0.028 | 5.55E-90  | 3 | LRRC32   |

|          |             |       |       |          |   |           |
|----------|-------------|-------|-------|----------|---|-----------|
| 4.62E-94 | 0.527647412 | 0.647 | 0.365 | 8.62E-90 | 3 | FAM177A1  |
| 9.11E-94 | 0.583633973 | 0.511 | 0.221 | 1.70E-89 | 3 | MIDN      |
| 4.65E-93 | 0.641732684 | 0.582 | 0.272 | 8.68E-89 | 3 | BHLHE40   |
| 5.38E-92 | 0.457478742 | 0.881 | 0.657 | 1.00E-87 | 3 | ARF1      |
| 1.21E-91 | 0.49520828  | 0.823 | 0.52  | 2.26E-87 | 3 | IDS       |
| 3.29E-91 | 0.507167386 | 0.681 | 0.435 | 6.13E-87 | 3 | SELENOT   |
| 4.84E-91 | 0.525594495 | 0.63  | 0.356 | 9.01E-87 | 3 | SEC14L1   |
| 5.16E-91 | 0.516925383 | 0.558 | 0.298 | 9.61E-87 | 3 | PAF1      |
| 3.10E-90 | 0.453852075 | 0.733 | 0.485 | 5.78E-86 | 3 | EHMT1     |
| 1.16E-89 | 0.417379704 | 0.779 | 0.533 | 2.16E-85 | 3 | HSPA5     |
| 1.17E-89 | 0.523081218 | 0.638 | 0.365 | 2.19E-85 | 3 | TGIF1     |
| 2.65E-89 | 0.478262539 | 0.873 | 0.672 | 4.94E-85 | 3 | YBX3      |
| 4.04E-89 | 0.539387764 | 0.77  | 0.508 | 7.53E-85 | 3 | ATP2B1    |
| 4.99E-89 | 0.457108981 | 0.839 | 0.601 | 9.31E-85 | 3 | SRSF2     |
| 6.08E-89 | 0.488278009 | 0.556 | 0.295 | 1.13E-84 | 3 | TSPYL1    |
| 1.12E-88 | 0.544450485 | 0.735 | 0.524 | 2.10E-84 | 3 | ATP6V0B   |
| 5.15E-88 | 0.459855777 | 0.213 | 0.019 | 9.60E-84 | 3 | SCD       |
| 5.45E-88 | 0.507685034 | 0.427 | 0.178 | 1.02E-83 | 3 | MED29     |
| 2.01E-87 | 0.611302647 | 0.435 | 0.164 | 3.75E-83 | 3 | TUBB2A    |
| 4.50E-87 | 0.457759105 | 0.513 | 0.253 | 8.39E-83 | 3 | SELENOS   |
| 1.26E-86 | 0.597556282 | 0.211 | 0.014 | 2.36E-82 | 3 | EMP1      |
| 1.40E-86 | 0.413850023 | 0.772 | 0.538 | 2.61E-82 | 3 | PSMA7     |
| 3.08E-86 | 0.481724593 | 0.332 | 0.098 | 5.74E-82 | 3 | PDE4A     |
| 1.67E-85 | 0.375696306 | 0.905 | 0.71  | 3.11E-81 | 3 | SLC25A3   |
| 3.03E-85 | 0.494382041 | 0.725 | 0.462 | 5.66E-81 | 3 | EMD       |
| 4.96E-85 | 0.751000571 | 0.505 | 0.267 | 9.24E-81 | 3 | WARS      |
| 1.87E-84 | 0.489818167 | 0.742 | 0.493 | 3.48E-80 | 3 | MAPK1IP1L |
| 2.29E-84 | 0.478962111 | 0.435 | 0.189 | 4.27E-80 | 3 | KCTD20    |
| 1.13E-83 | 0.459308595 | 0.834 | 0.597 | 2.11E-79 | 3 | SRSF3     |
| 1.21E-83 | 0.521520801 | 0.683 | 0.429 | 2.25E-79 | 3 | ZEB2      |
| 2.35E-83 | 0.467348539 | 0.404 | 0.163 | 4.39E-79 | 3 | RBBP8     |
| 8.11E-83 | 0.454618029 | 0.46  | 0.22  | 1.51E-78 | 3 | MANBA     |
| 1.47E-82 | 0.479726368 | 0.537 | 0.276 | 2.74E-78 | 3 | GNA13     |
| 1.99E-82 | 0.523332255 | 0.622 | 0.358 | 3.70E-78 | 3 | FBXO21    |
| 3.14E-82 | 0.322940547 | 0.735 | 0.449 | 5.85E-78 | 3 | BACH2     |
| 3.31E-82 | 0.418372147 | 0.637 | 0.395 | 6.18E-78 | 3 | RPN1      |
| 3.40E-82 | 0.438766339 | 0.279 | 0.066 | 6.34E-78 | 3 | SLC25A4   |
| 1.46E-81 | 0.41926564  | 0.775 | 0.535 | 2.71E-77 | 3 | RAB11FIP1 |
| 9.08E-81 | 0.472803845 | 0.287 | 0.061 | 1.69E-76 | 3 | CYBB      |
| 1.05E-80 | 0.458644866 | 0.445 | 0.168 | 1.95E-76 | 3 | KLF4      |
| 4.03E-80 | 0.511208432 | 0.394 | 0.136 | 7.52E-76 | 3 | SLCO4A1   |
| 6.08E-80 | 0.446997262 | 0.629 | 0.378 | 1.13E-75 | 3 | CDKN1B    |
| 1.68E-79 | 0.480233199 | 0.413 | 0.159 | 3.13E-75 | 3 | JOSD1     |
| 2.03E-79 | 0.459863624 | 0.511 | 0.276 | 3.79E-75 | 3 | JPT1      |
| 2.43E-79 | 0.364210387 | 0.897 | 0.726 | 4.53E-75 | 3 | MORF4L1   |
| 1.03E-78 | 0.541332991 | 0.629 | 0.39  | 1.91E-74 | 3 | PBXIP1    |

|          |             |       |       |          |   |            |
|----------|-------------|-------|-------|----------|---|------------|
| 2.12E-78 | 0.479939486 | 0.588 | 0.331 | 3.95E-74 | 3 | STMN1      |
| 2.12E-77 | 0.444465039 | 0.555 | 0.311 | 3.95E-73 | 3 | UBE2A      |
| 2.85E-77 | 0.389636051 | 0.491 | 0.254 | 5.32E-73 | 3 | NEU1       |
| 1.64E-76 | 0.426492426 | 0.759 | 0.504 | 3.06E-72 | 3 | CYCS       |
| 2.38E-76 | 0.402158566 | 0.51  | 0.266 | 4.43E-72 | 3 | FGFR1OP2   |
| 2.52E-76 | 0.466361657 | 0.622 | 0.373 | 4.70E-72 | 3 | WBP11      |
| 4.92E-76 | 0.351142176 | 0.84  | 0.62  | 9.16E-72 | 3 | DDX3X      |
| 5.08E-76 | 0.413035692 | 0.775 | 0.556 | 9.48E-72 | 3 | GNG2       |
| 1.09E-75 | 0.509668761 | 0.591 | 0.329 | 2.02E-71 | 3 | RANBP2     |
| 4.78E-75 | 0.472633318 | 0.73  | 0.518 | 8.92E-71 | 3 | CIB1       |
| 6.06E-75 | 0.559808521 | 0.498 | 0.247 | 1.13E-70 | 3 | NXT1       |
| 7.06E-75 | 0.398800593 | 0.703 | 0.485 | 1.32E-70 | 3 | VDAC2      |
| 1.03E-74 | 0.516864031 | 0.44  | 0.209 | 1.92E-70 | 3 | PRNP       |
| 1.81E-74 | 0.415942828 | 0.516 | 0.263 | 3.38E-70 | 3 | WDR74      |
| 2.06E-74 | 0.544282623 | 0.577 | 0.342 | 3.85E-70 | 3 | CDK2AP2    |
| 4.19E-74 | 0.456941146 | 0.352 | 0.121 | 7.81E-70 | 3 | FAM49A     |
| 6.75E-74 | 0.528119658 | 0.283 | 0.077 | 1.26E-69 | 3 | FOSL2      |
| 7.60E-74 | 0.300219193 | 0.53  | 0.243 | 1.42E-69 | 3 | NR4A3      |
| 1.07E-73 | 0.458908165 | 0.665 | 0.425 | 2.00E-69 | 3 | UBE2N      |
| 2.30E-73 | 0.439636254 | 0.718 | 0.476 | 4.28E-69 | 3 | PRKAR1A    |
| 5.59E-73 | 0.50010343  | 0.472 | 0.225 | 1.04E-68 | 3 | EHD4       |
| 6.47E-73 | 0.367423639 | 0.903 | 0.73  | 1.21E-68 | 3 | CNBP       |
| 6.63E-73 | 0.350921979 | 0.926 | 0.782 | 1.24E-68 | 3 | DAZAP2     |
| 2.27E-72 | 0.428320984 | 0.46  | 0.223 | 4.23E-68 | 3 | PNP        |
| 2.99E-72 | 0.405422939 | 0.733 | 0.517 | 5.57E-68 | 3 | SNRPG      |
| 6.81E-72 | 0.431905088 | 0.589 | 0.33  | 1.27E-67 | 3 | MAPRE2     |
| 7.94E-72 | 0.409799389 | 0.743 | 0.521 | 1.48E-67 | 3 | HNRNPF     |
| 8.61E-72 | 0.431355845 | 0.344 | 0.107 | 1.60E-67 | 3 | BAIAP3     |
| 1.66E-71 | 0.407455616 | 0.501 | 0.282 | 3.09E-67 | 3 | NIPA2      |
| 2.21E-71 | 0.417865879 | 0.75  | 0.543 | 4.13E-67 | 3 | SNU13      |
| 2.27E-71 | 0.647988615 | 0.333 | 0.129 | 4.23E-67 | 3 | EPS8L2     |
| 2.59E-71 | 0.386426341 | 0.609 | 0.376 | 4.82E-67 | 3 | G3BP1      |
| 5.33E-71 | 0.443212092 | 0.438 | 0.202 | 9.93E-67 | 3 | ZHX2       |
| 9.78E-71 | 0.502181868 | 0.556 | 0.273 | 1.82E-66 | 3 | PER1       |
| 1.04E-70 | 0.388988279 | 0.213 | 0.03  | 1.94E-66 | 3 | HCK        |
| 1.18E-70 | 0.577029176 | 0.574 | 0.334 | 2.19E-66 | 3 | ACSM3      |
| 2.57E-70 | 0.425625274 | 0.303 | 0.083 | 4.79E-66 | 3 | AL136454.1 |
| 3.42E-70 | 0.422733614 | 0.819 | 0.601 | 6.37E-66 | 3 | XRCC6      |
| 1.37E-69 | 0.452586878 | 0.766 | 0.549 | 2.55E-65 | 3 | DDX21      |
| 8.50E-69 | 0.451652288 | 0.63  | 0.379 | 1.58E-64 | 3 | TENT5C     |
| 6.03E-68 | 0.398046834 | 0.341 | 0.133 | 1.12E-63 | 3 | NANS       |
| 1.02E-67 | 0.426500862 | 0.237 | 0.051 | 1.91E-63 | 3 | SLC25A29   |
| 1.66E-67 | 0.4320865   | 0.499 | 0.26  | 3.09E-63 | 3 | GNL1       |
| 3.24E-67 | 0.446244661 | 0.384 | 0.148 | 6.03E-63 | 3 | SLC9A3R1   |
| 4.41E-67 | 0.40486079  | 0.426 | 0.202 | 8.21E-63 | 3 | SAR1A      |
| 4.58E-67 | 0.468981877 | 0.513 | 0.262 | 8.54E-63 | 3 | RUBCN      |

|          |             |       |       |          |   |          |
|----------|-------------|-------|-------|----------|---|----------|
| 6.55E-67 | 0.390170077 | 0.352 | 0.144 | 1.22E-62 | 3 | CHST15   |
| 1.19E-66 | 0.455166189 | 0.728 | 0.514 | 2.22E-62 | 3 | RELB     |
| 1.64E-66 | 0.367230108 | 0.608 | 0.39  | 3.06E-62 | 3 | SRPRA    |
| 2.84E-66 | 0.382169553 | 0.461 | 0.24  | 5.29E-62 | 3 | RNF168   |
| 6.52E-66 | 0.385986372 | 0.268 | 0.076 | 1.22E-61 | 3 | GNB4     |
| 6.65E-66 | 0.373626792 | 0.221 | 0.042 | 1.24E-61 | 3 | CTU2     |
| 1.26E-65 | 0.41549881  | 0.38  | 0.16  | 2.35E-61 | 3 | PPFIBP2  |
| 2.13E-65 | 0.318931845 | 0.542 | 0.353 | 3.96E-61 | 3 | PFDN2    |
| 2.22E-65 | 0.358177113 | 0.686 | 0.462 | 4.13E-61 | 3 | HSPA9    |
| 2.99E-65 | 0.495777802 | 0.415 | 0.184 | 5.58E-61 | 3 | TOB1     |
| 1.12E-64 | 0.407585484 | 0.68  | 0.42  | 2.10E-60 | 3 | HSPD1    |
| 1.38E-64 | 0.310042772 | 0.903 | 0.734 | 2.58E-60 | 3 | SUMO2    |
| 1.60E-64 | 0.407537028 | 0.537 | 0.302 | 2.99E-60 | 3 | STAU1    |
| 1.94E-64 | 0.358679882 | 0.609 | 0.391 | 3.62E-60 | 3 | MAT2A    |
| 3.38E-64 | 0.402867432 | 0.347 | 0.134 | 6.31E-60 | 3 | TIGAR    |
| 6.70E-64 | 0.341889219 | 0.755 | 0.562 | 1.25E-59 | 3 | VCP      |
| 9.66E-64 | 0.42248074  | 0.461 | 0.234 | 1.80E-59 | 3 | KIAA1191 |
| 2.55E-63 | 0.409426174 | 0.647 | 0.432 | 4.75E-59 | 3 | MBP      |
| 5.91E-63 | 0.356711803 | 0.369 | 0.176 | 1.10E-58 | 3 | ARFGAP3  |
| 1.02E-62 | 0.393853031 | 0.394 | 0.204 | 1.91E-58 | 3 | KPNA2    |
| 1.39E-62 | 0.415314379 | 0.535 | 0.333 | 2.58E-58 | 3 | TMX4     |
| 3.40E-62 | 0.355852921 | 0.408 | 0.2   | 6.34E-58 | 3 | H2AFX    |
| 4.72E-62 | 0.469365764 | 0.734 | 0.515 | 8.79E-58 | 3 | ANXA2    |
| 5.25E-62 | 0.399091906 | 0.453 | 0.226 | 9.79E-58 | 3 | PLEKHB2  |
| 6.09E-62 | 0.400099113 | 0.261 | 0.083 | 1.14E-57 | 3 | KIF21A   |
| 8.85E-62 | 0.405580831 | 0.612 | 0.395 | 1.65E-57 | 3 | SF3A1    |
| 1.64E-61 | 0.371671198 | 0.782 | 0.579 | 3.06E-57 | 3 | RBM8A    |
| 1.67E-61 | 0.299053777 | 0.274 | 0.096 | 3.11E-57 | 3 | XIST     |
| 1.72E-61 | 0.406888585 | 0.447 | 0.228 | 3.20E-57 | 3 | TOB2     |
| 2.71E-61 | 0.327806959 | 0.867 | 0.675 | 5.06E-57 | 3 | RAN      |
| 3.13E-61 | 0.319276337 | 0.372 | 0.18  | 5.84E-57 | 3 | MED21    |
| 3.57E-61 | 0.372104143 | 0.584 | 0.362 | 6.65E-57 | 3 | HIVEP1   |
| 4.26E-61 | 0.362355892 | 0.789 | 0.6   | 7.94E-57 | 3 | ORAI2    |
| 5.00E-61 | 0.328381803 | 0.189 | 0.026 | 9.33E-57 | 3 | ALDH2    |
| 9.91E-61 | 0.43769793  | 0.306 | 0.097 | 1.85E-56 | 3 | SPAG1    |
| 2.74E-60 | 0.393976737 | 0.572 | 0.349 | 5.10E-56 | 3 | DNAJA2   |
| 3.12E-60 | 0.291196289 | 0.141 | 0.008 | 5.82E-56 | 3 | GPRC5C   |
| 4.53E-60 | 0.511271117 | 0.85  | 0.684 | 8.44E-56 | 3 | LITAF    |
| 4.66E-60 | 0.365613877 | 0.299 | 0.121 | 8.69E-56 | 3 | HMCES    |
| 6.69E-60 | 0.377766416 | 0.705 | 0.509 | 1.25E-55 | 3 | MAP1LC3B |
| 1.08E-59 | 0.381772361 | 0.323 | 0.124 | 2.01E-55 | 3 | FBXO34   |
| 1.75E-59 | 0.334389342 | 0.256 | 0.073 | 3.26E-55 | 3 | RORA     |
| 2.38E-59 | 0.443175344 | 0.421 | 0.212 | 4.43E-55 | 3 | MTHFD2   |
| 2.88E-59 | 0.410078217 | 0.604 | 0.383 | 5.36E-55 | 3 | AKIRIN1  |
| 3.06E-59 | 0.354337732 | 0.835 | 0.623 | 5.71E-55 | 3 | CD44     |
| 3.40E-59 | 0.310439092 | 0.419 | 0.238 | 6.33E-55 | 3 | CCDC47   |

|          |             |       |       |          |   |                      |
|----------|-------------|-------|-------|----------|---|----------------------|
| 5.71E-59 | 0.330994653 | 0.323 | 0.151 | 1.06E-54 | 3 | CDK16                |
| 8.78E-59 | 0.330839806 | 0.376 | 0.2   | 1.64E-54 | 3 | WIPF2                |
| 2.10E-58 | 0.325738309 | 0.581 | 0.389 | 3.92E-54 | 3 | TMED10               |
| 2.11E-58 | 0.329256926 | 0.746 | 0.49  | 3.93E-54 | 3 | RGCC                 |
| 2.59E-58 | 0.453149507 | 0.637 | 0.395 | 4.82E-54 | 3 | PLEKHA2              |
| 3.91E-58 | 0.352430153 | 0.573 | 0.382 | 7.29E-54 | 3 | TMED2                |
| 4.43E-58 | 0.379649324 | 0.376 | 0.169 | 8.25E-54 | 3 | HGSNAT               |
| 5.38E-58 | 0.34169227  | 0.214 | 0.049 | 1.00E-53 | 3 | SYNJ2                |
| 5.64E-58 | 0.404660608 | 0.479 | 0.262 | 1.05E-53 | 3 | HIF1A                |
| 5.70E-58 | 0.38233693  | 0.774 | 0.593 | 1.06E-53 | 3 | GPX4                 |
| 6.05E-58 | 0.343654205 | 0.19  | 0.036 | 1.13E-53 | 3 | COL18A1              |
| 7.77E-58 | 0.330315485 | 0.326 | 0.148 | 1.45E-53 | 3 | RAB35                |
| 2.81E-57 | 0.4819225   | 0.515 | 0.289 | 5.24E-53 | 3 | PPP1CB               |
| 2.91E-57 | 0.359700512 | 0.242 | 0.069 | 5.42E-53 | 3 | DUSP3                |
| 3.10E-57 | 0.390811297 | 0.485 | 0.267 | 5.79E-53 | 3 | ADIPOR1              |
| 3.81E-57 | 0.33754988  | 0.983 | 0.867 | 7.10E-53 | 3 | MYL6                 |
| 6.09E-57 | 0.311969261 | 0.335 | 0.158 | 1.14E-52 | 3 | POR                  |
| 9.81E-57 | 0.392985628 | 0.387 | 0.189 | 1.83E-52 | 3 | DNAJB2               |
| 1.40E-56 | 0.389190584 | 0.771 | 0.571 | 2.62E-52 | 3 | YWHAQ                |
| 1.45E-56 | 0.44706648  | 0.282 | 0.098 | 2.71E-52 | 3 | KLK1                 |
| 5.77E-56 | 0.440818316 | 0.471 | 0.26  | 1.07E-51 | 3 | NRROS                |
| 9.66E-56 | 0.369771958 | 0.699 | 0.507 | 1.80E-51 | 3 | EIF3A                |
| 1.00E-55 | 0.372404223 | 0.532 | 0.311 | 1.87E-51 | 3 | RNF138               |
| 2.08E-55 | 0.450223814 | 0.463 | 0.246 | 3.89E-51 | 3 | SOD2-ENSG00000112096 |
| 3.37E-55 | 0.322657173 | 0.586 | 0.393 | 6.29E-51 | 3 | C1orf43              |
| 4.97E-55 | 0.310719431 | 0.564 | 0.384 | 9.26E-51 | 3 | ADRM1                |
| 5.21E-55 | 0.398876576 | 0.518 | 0.311 | 9.70E-51 | 3 | RELA                 |
| 9.22E-55 | 0.314628866 | 0.5   | 0.305 | 1.72E-50 | 3 | RNF114               |
| 1.51E-54 | 0.351014324 | 0.585 | 0.375 | 2.81E-50 | 3 | ARPP19               |
| 3.06E-54 | 0.431520605 | 0.365 | 0.171 | 5.70E-50 | 3 | ARRDC2               |
| 7.86E-54 | 0.458103972 | 0.361 | 0.157 | 1.47E-49 | 3 | STX11                |
| 8.13E-54 | 0.408492278 | 0.37  | 0.168 | 1.52E-49 | 3 | CORO1C               |
| 9.84E-54 | 0.344655211 | 0.247 | 0.083 | 1.83E-49 | 3 | FUZ                  |
| 1.02E-53 | 0.395488505 | 0.556 | 0.337 | 1.90E-49 | 3 | SDCBP                |
| 1.24E-53 | 0.315442268 | 0.228 | 0.074 | 2.31E-49 | 3 | TM2D2                |
| 1.79E-53 | 0.314041332 | 0.643 | 0.426 | 3.34E-49 | 3 | BACH1                |
| 2.22E-53 | 0.563703288 | 0.387 | 0.205 | 4.13E-49 | 3 | ISG15                |
| 2.54E-53 | 0.299317132 | 0.53  | 0.298 | 4.73E-49 | 3 | RALGAPA1             |
| 3.32E-53 | 0.368267496 | 0.458 | 0.277 | 6.18E-49 | 3 | PITHD1               |
| 1.34E-52 | 0.332814062 | 0.526 | 0.337 | 2.49E-48 | 3 | MAPRE1               |
| 1.55E-52 | 0.486064326 | 0.41  | 0.219 | 2.89E-48 | 3 | MRPS6                |
| 2.11E-52 | 0.281843286 | 0.225 | 0.072 | 3.94E-48 | 3 | WDR47                |
| 2.22E-52 | 0.353902871 | 0.432 | 0.221 | 4.13E-48 | 3 | CCPG1                |
| 2.85E-52 | 0.396475001 | 0.365 | 0.159 | 5.30E-48 | 3 | APBB2                |
| 2.85E-52 | 0.415116286 | 0.537 | 0.319 | 5.31E-48 | 3 | RNF149               |
| 3.87E-52 | 0.330551102 | 0.38  | 0.204 | 7.22E-48 | 3 | PDE4DIP              |

|          |             |       |       |          |   |           |
|----------|-------------|-------|-------|----------|---|-----------|
| 4.53E-52 | 0.344922407 | 0.601 | 0.393 | 8.45E-48 | 3 | PHF1      |
| 7.52E-52 | 0.268717404 | 0.518 | 0.32  | 1.40E-47 | 3 | EIF4A3    |
| 1.24E-51 | 0.284559799 | 0.588 | 0.408 | 2.31E-47 | 3 | CLTA      |
| 1.95E-51 | 0.332480935 | 0.336 | 0.164 | 3.64E-47 | 3 | ARID3A    |
| 1.98E-51 | 0.301843844 | 0.223 | 0.074 | 3.70E-47 | 3 | DUSP14    |
| 2.12E-51 | 0.314365001 | 0.356 | 0.195 | 3.95E-47 | 3 | C14orf119 |
| 2.16E-51 | 0.355189594 | 0.392 | 0.185 | 4.02E-47 | 3 | ACSL3     |
| 2.30E-51 | 0.409789937 | 0.448 | 0.262 | 4.28E-47 | 3 | SRRT      |
| 2.39E-51 | 0.317540635 | 0.846 | 0.665 | 4.46E-47 | 3 | GSTP1     |
| 2.97E-51 | 0.293030238 | 0.353 | 0.195 | 5.54E-47 | 3 | UBE2D1    |
| 3.33E-51 | 0.287604956 | 0.272 | 0.122 | 6.20E-47 | 3 | CNIH4     |
| 3.98E-51 | 0.381641489 | 0.505 | 0.303 | 7.41E-47 | 3 | TACC1     |
| 4.50E-51 | 0.274528229 | 0.152 | 0.02  | 8.39E-47 | 3 | SMAD7     |
| 5.57E-51 | 0.318733868 | 0.32  | 0.152 | 1.04E-46 | 3 | ACD       |
| 4.42E-50 | 0.331621373 | 0.356 | 0.187 | 8.23E-46 | 3 | IL21R     |
| 5.45E-50 | 0.39400787  | 0.28  | 0.096 | 1.02E-45 | 3 | N4BP3     |
| 7.24E-50 | 0.323483831 | 0.376 | 0.183 | 1.35E-45 | 3 | GTPBP1    |
| 8.80E-50 | 0.282698935 | 0.68  | 0.507 | 1.64E-45 | 3 | TOP1      |
| 9.72E-50 | 0.338320446 | 0.448 | 0.242 | 1.81E-45 | 3 | PPIL4     |
| 1.43E-49 | 0.359826158 | 0.269 | 0.1   | 2.66E-45 | 3 | SLC5A3    |
| 1.81E-49 | 0.353054256 | 0.15  | 0.023 | 3.37E-45 | 3 | CHAC1     |
| 5.82E-49 | 0.349830396 | 0.275 | 0.111 | 1.08E-44 | 3 | SOCS3     |
| 1.42E-48 | 0.28343794  | 0.694 | 0.425 | 2.66E-44 | 3 | KLF10     |
| 1.81E-48 | 0.338533644 | 0.398 | 0.212 | 3.37E-44 | 3 | AFG3L2    |
| 1.93E-48 | 0.329537467 | 0.85  | 0.681 | 3.59E-44 | 3 | HNRNPA0   |
| 3.17E-48 | 0.447884886 | 0.441 | 0.233 | 5.91E-44 | 3 | TMBIM1    |
| 4.31E-48 | 0.389563792 | 0.252 | 0.074 | 8.04E-44 | 3 | SLC1A4    |
| 4.78E-48 | 0.29342668  | 0.373 | 0.213 | 8.91E-44 | 3 | SURF4     |
| 5.98E-48 | 0.272096096 | 0.383 | 0.21  | 1.11E-43 | 3 | TMEM50B   |
| 6.55E-48 | 0.358996178 | 0.829 | 0.675 | 1.22E-43 | 3 | SERP1     |
| 1.35E-47 | 0.373160441 | 0.355 | 0.164 | 2.52E-43 | 3 | NBEAL1    |
| 1.36E-47 | 0.343177117 | 0.623 | 0.437 | 2.53E-43 | 3 | PPP2R1A   |
| 2.05E-47 | 0.259710236 | 0.424 | 0.265 | 3.82E-43 | 3 | TNPO1     |
| 2.18E-47 | 0.307913331 | 0.668 | 0.467 | 4.07E-43 | 3 | B4GALT1   |
| 2.37E-47 | 0.519465866 | 0.552 | 0.35  | 4.41E-43 | 3 | IGFBP4    |
| 5.75E-47 | 0.356274508 | 0.626 | 0.459 | 1.07E-42 | 3 | HNRNPUL1  |
| 5.94E-47 | 0.36623308  | 0.153 | 0.025 | 1.11E-42 | 3 | RGS12     |
| 7.11E-47 | 0.41281466  | 0.253 | 0.09  | 1.33E-42 | 3 | CD9       |
| 8.29E-47 | 0.397964718 | 0.256 | 0.09  | 1.55E-42 | 3 | GZF1      |
| 9.61E-47 | 0.372253247 | 0.504 | 0.28  | 1.79E-42 | 3 | NUP98     |
| 1.35E-46 | 0.254941869 | 0.142 | 0.017 | 2.51E-42 | 3 | TBC1D8    |
| 1.39E-46 | 0.460466495 | 0.492 | 0.301 | 2.60E-42 | 3 | CHMP1B    |
| 1.42E-46 | 0.286293946 | 0.375 | 0.198 | 2.66E-42 | 3 | TWF1      |
| 1.86E-46 | 0.32597585  | 0.522 | 0.343 | 3.46E-42 | 3 | VPS35     |
| 2.04E-46 | 0.3070327   | 0.435 | 0.252 | 3.81E-42 | 3 | USP9X     |
| 2.49E-46 | 0.329385687 | 0.326 | 0.154 | 4.65E-42 | 3 | LRRC41    |

|          |             |       |       |          |   |           |
|----------|-------------|-------|-------|----------|---|-----------|
| 3.03E-46 | 0.279771871 | 0.484 | 0.301 | 5.65E-42 | 3 | VMP1      |
| 3.71E-46 | 0.326482861 | 0.415 | 0.231 | 6.91E-42 | 3 | RRP12     |
| 7.84E-46 | 0.269794807 | 0.302 | 0.16  | 1.46E-41 | 3 | MGAT2     |
| 9.05E-46 | 0.396512857 | 0.547 | 0.362 | 1.69E-41 | 3 | HMGA1     |
| 1.08E-45 | 0.259149802 | 0.806 | 0.659 | 2.01E-41 | 3 | DDX24     |
| 1.10E-45 | 0.487314909 | 0.68  | 0.514 | 2.04E-41 | 3 | ST6GAL1   |
| 1.10E-45 | 0.339304838 | 0.461 | 0.272 | 2.06E-41 | 3 | EIF4G1    |
| 2.41E-45 | 0.364523876 | 0.245 | 0.087 | 4.50E-41 | 3 | RNF166    |
| 2.71E-45 | 0.405106127 | 0.263 | 0.106 | 5.05E-41 | 3 | NINJ1     |
| 3.93E-45 | 0.345599237 | 0.633 | 0.456 | 7.33E-41 | 3 | GNG5      |
| 8.53E-45 | 0.312835404 | 0.75  | 0.568 | 1.59E-40 | 3 | PRDX1     |
| 9.99E-45 | 0.353357826 | 0.558 | 0.382 | 1.86E-40 | 3 | NDUFA6    |
| 1.85E-44 | 0.353683118 | 0.394 | 0.208 | 3.45E-40 | 3 | CEBPG     |
| 3.64E-44 | 0.280663546 | 0.615 | 0.434 | 6.78E-40 | 3 | GCC2      |
| 6.80E-44 | 0.330455045 | 0.395 | 0.232 | 1.27E-39 | 3 | THEMIS2   |
| 7.71E-44 | 0.356224638 | 0.335 | 0.153 | 1.44E-39 | 3 | DYNLT3    |
| 8.92E-44 | 0.374999186 | 0.335 | 0.164 | 1.66E-39 | 3 | DSTN      |
| 8.93E-44 | 0.299302836 | 0.346 | 0.177 | 1.66E-39 | 3 | PSEN1     |
| 1.10E-43 | 0.319527417 | 0.351 | 0.168 | 2.06E-39 | 3 | CXCL16    |
| 1.22E-43 | 0.363230776 | 0.439 | 0.251 | 2.27E-39 | 3 | RUNX3     |
| 2.06E-43 | 0.265638368 | 0.581 | 0.411 | 3.84E-39 | 3 | AZIN1     |
| 5.23E-43 | 0.293432041 | 0.287 | 0.13  | 9.75E-39 | 3 | RCE1      |
| 1.04E-42 | 0.316679212 | 0.571 | 0.401 | 1.94E-38 | 3 | MLF2      |
| 2.10E-42 | 0.279765876 | 0.712 | 0.527 | 3.91E-38 | 3 | BZW1      |
| 2.23E-42 | 0.330256574 | 0.28  | 0.129 | 4.16E-38 | 3 | WNT10A    |
| 3.81E-42 | 0.281322343 | 0.538 | 0.352 | 7.10E-38 | 3 | GOLGB1    |
| 4.96E-42 | 0.27789118  | 0.221 | 0.081 | 9.24E-38 | 3 | TP53INP2  |
| 5.69E-42 | 0.271428359 | 0.227 | 0.081 | 1.06E-37 | 3 | CFAP36    |
| 6.75E-42 | 0.280187037 | 0.182 | 0.047 | 1.26E-37 | 3 | DEAF1     |
| 7.82E-42 | 0.293808265 | 0.672 | 0.491 | 1.46E-37 | 3 | CD164     |
| 1.52E-41 | 0.267833223 | 0.228 | 0.09  | 2.84E-37 | 3 | TM9SF1    |
| 1.68E-41 | 0.328468249 | 0.507 | 0.33  | 3.14E-37 | 3 | NRBP1     |
| 1.74E-41 | 0.278167484 | 0.592 | 0.42  | 3.24E-37 | 3 | ATP1A1    |
| 1.94E-41 | 0.296832539 | 0.425 | 0.253 | 3.62E-37 | 3 | GARS      |
| 2.99E-41 | 0.281125979 | 0.393 | 0.241 | 5.58E-37 | 3 | TSPAN3    |
| 5.74E-41 | 0.290333998 | 0.469 | 0.276 | 1.07E-36 | 3 | SIPA1L1   |
| 6.36E-41 | 0.308288339 | 0.346 | 0.196 | 1.19E-36 | 3 | CCDC97    |
| 6.87E-41 | 0.338973518 | 0.369 | 0.197 | 1.28E-36 | 3 | GFOD1     |
| 8.30E-41 | 0.416656408 | 0.53  | 0.35  | 1.55E-36 | 3 | SPIB      |
| 8.59E-41 | 0.397188506 | 0.455 | 0.272 | 1.60E-36 | 3 | MARCKSL1  |
| 9.90E-41 | 0.290903516 | 0.282 | 0.143 | 1.85E-36 | 3 | NTMT1     |
| 1.79E-40 | 0.326872964 | 0.439 | 0.253 | 3.33E-36 | 3 | MORF4L2   |
| 1.89E-40 | 0.277159673 | 0.364 | 0.204 | 3.53E-36 | 3 | FAM120AOS |
| 4.72E-40 | 0.320444707 | 0.419 | 0.252 | 8.81E-36 | 3 | RHEB      |
| 6.14E-40 | 0.3130927   | 0.395 | 0.225 | 1.14E-35 | 3 | TSG101    |
| 9.14E-40 | 0.271868311 | 0.601 | 0.44  | 1.70E-35 | 3 | RAB7A     |

|          |             |       |       |          |   |          |
|----------|-------------|-------|-------|----------|---|----------|
| 1.22E-39 | 0.277265811 | 0.417 | 0.256 | 2.27E-35 | 3 | PSMD11   |
| 1.26E-39 | 0.470841582 | 0.336 | 0.165 | 2.35E-35 | 3 | NMB      |
| 2.06E-39 | 0.28418291  | 0.436 | 0.291 | 3.83E-35 | 3 | NOP56    |
| 2.62E-39 | 0.298246001 | 0.764 | 0.594 | 4.88E-35 | 3 | ARHGDI1  |
| 2.84E-39 | 0.404079595 | 0.331 | 0.167 | 5.30E-35 | 3 | MID1IP1  |
| 3.01E-39 | 0.282836144 | 0.307 | 0.155 | 5.61E-35 | 3 | TXNDC15  |
| 3.42E-39 | 0.255564383 | 0.576 | 0.387 | 6.38E-35 | 3 | SMARCA5  |
| 3.51E-39 | 0.281492492 | 0.397 | 0.25  | 6.55E-35 | 3 | CNIH1    |
| 3.80E-39 | 0.250913456 | 0.256 | 0.123 | 7.09E-35 | 3 | FAM210A  |
| 3.89E-39 | 0.274104181 | 0.628 | 0.462 | 7.25E-35 | 3 | SNX9     |
| 4.48E-39 | 0.274494945 | 0.477 | 0.317 | 8.36E-35 | 3 | VDAC1    |
| 7.64E-39 | 0.302687401 | 0.296 | 0.148 | 1.42E-34 | 3 | TLE1     |
| 8.24E-39 | 0.31106539  | 0.364 | 0.207 | 1.54E-34 | 3 | CISD2    |
| 8.88E-39 | 0.302665937 | 0.443 | 0.297 | 1.66E-34 | 3 | COX17    |
| 9.44E-39 | 0.280002639 | 0.259 | 0.107 | 1.76E-34 | 3 | ADIPOR2  |
| 1.02E-38 | 0.325136688 | 0.509 | 0.332 | 1.91E-34 | 3 | PTP4A1   |
| 2.55E-38 | 0.356840015 | 0.245 | 0.095 | 4.75E-34 | 3 | PLIN2    |
| 2.62E-38 | 0.255709413 | 0.702 | 0.543 | 4.88E-34 | 3 | C11orf58 |
| 2.66E-38 | 0.274271029 | 0.356 | 0.181 | 4.96E-34 | 3 | DNM1L    |
| 2.86E-38 | 0.343431627 | 0.225 | 0.09  | 5.34E-34 | 3 | LGALS3   |
| 6.12E-38 | 0.333141909 | 0.542 | 0.343 | 1.14E-33 | 3 | NASP     |
| 6.32E-38 | 0.305908593 | 0.514 | 0.35  | 1.18E-33 | 3 | MAGOH    |
| 6.54E-38 | 0.311576985 | 0.298 | 0.132 | 1.22E-33 | 3 | VAMP3    |
| 7.24E-38 | 0.280196111 | 0.818 | 0.659 | 1.35E-33 | 3 | CALR     |
| 7.50E-38 | 0.293973645 | 0.542 | 0.37  | 1.40E-33 | 3 | CHD4     |
| 9.80E-38 | 0.311692904 | 0.664 | 0.491 | 1.83E-33 | 3 | LAMTOR5  |
| 1.01E-37 | 0.254062368 | 0.235 | 0.102 | 1.88E-33 | 3 | PWWP2A   |
| 2.46E-37 | 0.390668982 | 0.604 | 0.413 | 4.59E-33 | 3 | PIM1     |
| 2.88E-37 | 0.25495143  | 0.418 | 0.264 | 5.36E-33 | 3 | POGZ     |
| 4.71E-37 | 0.252552112 | 0.729 | 0.558 | 8.79E-33 | 3 | KIAA1551 |
| 6.36E-37 | 0.295570998 | 0.257 | 0.106 | 1.19E-32 | 3 | HRK      |
| 7.34E-37 | 0.309232802 | 0.314 | 0.148 | 1.37E-32 | 3 | UAP1     |
| 7.38E-37 | 0.253456571 | 0.57  | 0.419 | 1.38E-32 | 3 | GHITM    |
| 7.52E-37 | 0.255480622 | 0.357 | 0.217 | 1.40E-32 | 3 | ZPR1     |
| 1.01E-36 | 0.330419585 | 0.402 | 0.25  | 1.88E-32 | 3 | HNRNPAB  |
| 1.09E-36 | 0.392655597 | 0.483 | 0.317 | 2.03E-32 | 3 | PEA15    |
| 1.19E-36 | 0.334464925 | 0.503 | 0.324 | 2.21E-32 | 3 | MRPL20   |
| 1.38E-36 | 0.306136927 | 0.209 | 0.074 | 2.57E-32 | 3 | IFI44L   |
| 1.73E-36 | 0.318502168 | 0.334 | 0.175 | 3.22E-32 | 3 | BTG3     |
| 2.03E-36 | 0.349056746 | 0.376 | 0.218 | 3.78E-32 | 3 | MX2      |
| 2.41E-36 | 0.298695339 | 0.35  | 0.195 | 4.48E-32 | 3 | CYP51A1  |
| 2.46E-36 | 0.265840594 | 0.354 | 0.217 | 4.59E-32 | 3 | MRPS18C  |
| 2.72E-36 | 0.438889466 | 0.312 | 0.151 | 5.06E-32 | 3 | MXD1     |
| 3.73E-36 | 0.278762494 | 0.439 | 0.292 | 6.95E-32 | 3 | GTF2F1   |
| 4.00E-36 | 0.275593573 | 0.754 | 0.612 | 7.45E-32 | 3 | PTGES3   |
| 4.42E-36 | 0.320298233 | 0.407 | 0.259 | 8.24E-32 | 3 | TOM1     |



|          |             |       |       |          |   |          |
|----------|-------------|-------|-------|----------|---|----------|
| 5.11E-36 | 0.314843226 | 0.429 | 0.267 | 9.53E-32 | 3 | SLIRP    |
| 5.25E-36 | 0.258592482 | 0.195 | 0.078 | 9.78E-32 | 3 | CASP9    |
| 5.26E-36 | 0.476586648 | 0.139 | 0.03  | 9.81E-32 | 3 | RASD1    |
| 5.35E-36 | 0.386441768 | 0.329 | 0.159 | 9.98E-32 | 3 | PRR7     |
| 8.82E-36 | 0.257168783 | 0.552 | 0.411 | 1.64E-31 | 3 | TMED9    |
| 1.59E-35 | 0.29558666  | 0.531 | 0.368 | 2.97E-31 | 3 | SSB      |
| 2.14E-35 | 0.274183306 | 0.436 | 0.252 | 4.00E-31 | 3 | SIMC1    |
| 2.56E-35 | 0.297160326 | 0.277 | 0.13  | 4.78E-31 | 3 | PLBD1    |
| 4.14E-35 | 0.250644052 | 0.405 | 0.275 | 7.72E-31 | 3 | USP1     |
| 5.49E-35 | 0.250204563 | 0.35  | 0.209 | 1.02E-30 | 3 | EIF2S1   |
| 5.85E-35 | 0.284943122 | 0.31  | 0.158 | 1.09E-30 | 3 | WDR45B   |
| 6.81E-35 | 0.434436523 | 0.436 | 0.269 | 1.27E-30 | 3 | IRF7     |
| 7.32E-35 | 0.312236791 | 0.286 | 0.124 | 1.36E-30 | 3 | AGO2     |
| 8.28E-35 | 0.26729965  | 0.672 | 0.518 | 1.54E-30 | 3 | EIF4H    |
| 9.60E-35 | 0.394454979 | 0.436 | 0.29  | 1.79E-30 | 3 | TXN      |
| 1.68E-34 | 0.276327406 | 0.476 | 0.3   | 3.13E-30 | 3 | SMU1     |
| 1.86E-34 | 0.290418856 | 0.34  | 0.198 | 3.47E-30 | 3 | ORMDL2   |
| 2.45E-34 | 0.289998172 | 0.215 | 0.076 | 4.56E-30 | 3 | RPGR     |
| 3.43E-34 | 0.312862234 | 0.275 | 0.152 | 6.39E-30 | 3 | VSIR     |
| 5.30E-34 | 0.289592464 | 0.443 | 0.28  | 9.89E-30 | 3 | ABCF1    |
| 9.43E-34 | 0.269314729 | 0.425 | 0.258 | 1.76E-29 | 3 | PHF20L1  |
| 2.45E-33 | 0.30215297  | 0.209 | 0.063 | 4.56E-29 | 3 | NBPF26   |
| 2.46E-33 | 0.276752317 | 0.384 | 0.223 | 4.59E-29 | 3 | ZBTB43   |
| 4.22E-33 | 0.332402984 | 0.26  | 0.129 | 7.88E-29 | 3 | PDCD1    |
| 6.61E-33 | 0.261756181 | 0.281 | 0.149 | 1.23E-28 | 3 | RAB9A    |
| 1.85E-32 | 0.267038357 | 0.517 | 0.353 | 3.45E-28 | 3 | NUDC     |
| 2.92E-32 | 0.286554033 | 0.421 | 0.265 | 5.44E-28 | 3 | CHPT1    |
| 3.66E-32 | 0.33630379  | 0.838 | 0.707 | 6.82E-28 | 3 | WASF2    |
| 1.23E-31 | 0.307821585 | 0.252 | 0.109 | 2.28E-27 | 3 | FAM45A   |
| 1.77E-31 | 0.26238174  | 0.529 | 0.375 | 3.29E-27 | 3 | YWHAE    |
| 5.85E-31 | 0.346128338 | 0.684 | 0.526 | 1.09E-26 | 3 | NR3C1    |
| 8.40E-31 | 0.260773706 | 0.299 | 0.151 | 1.56E-26 | 3 | RTN3     |
| 1.70E-30 | 0.322729265 | 0.274 | 0.128 | 3.16E-26 | 3 | PNMA1    |
| 1.97E-30 | 0.271167278 | 0.358 | 0.216 | 3.67E-26 | 3 | DEGS1    |
| 2.34E-30 | 0.250453041 | 0.43  | 0.276 | 4.36E-26 | 3 | RAB1A    |
| 2.63E-30 | 0.290385922 | 0.259 | 0.132 | 4.90E-26 | 3 | GYG1     |
| 3.19E-30 | 0.264681618 | 0.236 | 0.107 | 5.95E-26 | 3 | CAMKK2   |
| 4.91E-30 | 0.280500288 | 0.301 | 0.168 | 9.16E-26 | 3 | ITPKB    |
| 6.18E-30 | 0.257782493 | 0.287 | 0.165 | 1.15E-25 | 3 | SLC25A19 |
| 6.44E-30 | 0.25306158  | 0.459 | 0.327 | 1.20E-25 | 3 | ELOC     |
| 6.62E-30 | 0.252135418 | 0.907 | 0.794 | 1.23E-25 | 3 | S100A6   |
| 1.19E-29 | 0.278814336 | 0.951 | 0.842 | 2.22E-25 | 3 | HLA-DRB5 |
| 1.96E-29 | 0.283643692 | 0.431 | 0.288 | 3.65E-25 | 3 | XBP1     |
| 2.92E-29 | 0.297882239 | 0.399 | 0.231 | 5.43E-25 | 3 | ECE1     |
| 3.10E-29 | 0.273736074 | 0.335 | 0.195 | 5.77E-25 | 3 | SQLE     |
| 3.11E-29 | 0.289702935 | 0.383 | 0.213 | 5.79E-25 | 3 | NOLC1    |

|           |             |       |       |           |   |          |
|-----------|-------------|-------|-------|-----------|---|----------|
| 4.90E-29  | 0.321043165 | 0.351 | 0.214 | 9.14E-25  | 3 | BCL3     |
| 5.93E-29  | 0.269445044 | 0.337 | 0.192 | 1.10E-24  | 3 | CHCHD7   |
| 7.35E-29  | 0.279683364 | 0.386 | 0.226 | 1.37E-24  | 3 | HIVEP2   |
| 1.14E-28  | 0.266741695 | 0.267 | 0.14  | 2.12E-24  | 3 | TARS     |
| 1.17E-28  | 0.28046031  | 0.366 | 0.213 | 2.18E-24  | 3 | BIRC2    |
| 2.28E-28  | 0.27202349  | 0.447 | 0.309 | 4.25E-24  | 3 | IRF2BP2  |
| 2.64E-28  | 0.264005884 | 0.384 | 0.233 | 4.92E-24  | 3 | COPB2    |
| 4.40E-28  | 0.267211509 | 0.512 | 0.362 | 8.20E-24  | 3 | KDM4B    |
| 4.48E-28  | 0.261076946 | 0.401 | 0.253 | 8.35E-24  | 3 | CTR9     |
| 1.02E-27  | 0.274980137 | 0.34  | 0.2   | 1.91E-23  | 3 | GNG7     |
| 1.22E-27  | 0.270365665 | 0.341 | 0.196 | 2.27E-23  | 3 | MESD     |
| 1.65E-27  | 0.307399582 | 0.372 | 0.228 | 3.08E-23  | 3 | GLIPR1   |
| 5.99E-27  | 0.321599845 | 0.391 | 0.246 | 1.12E-22  | 3 | AAED1    |
| 7.08E-27  | 0.260443073 | 0.423 | 0.271 | 1.32E-22  | 3 | ZFAND6   |
| 9.32E-27  | 0.256082229 | 0.371 | 0.23  | 1.74E-22  | 3 | HSBP1    |
| 1.40E-26  | 0.267113367 | 0.329 | 0.197 | 2.61E-22  | 3 | TUBA1C   |
| 1.47E-26  | 0.255144977 | 0.214 | 0.09  | 2.75E-22  | 3 | SLC9B2   |
| 2.43E-26  | 0.261497781 | 0.355 | 0.209 | 4.53E-22  | 3 | GNL2     |
| 2.57E-26  | 0.277814964 | 0.427 | 0.288 | 4.79E-22  | 3 | HMOX1    |
| 4.64E-26  | 0.256331291 | 0.265 | 0.156 | 8.65E-22  | 3 | PIIF     |
| 5.61E-26  | 0.298211351 | 0.612 | 0.459 | 1.05E-21  | 3 | CNPPD1   |
| 6.88E-26  | 0.252471725 | 0.349 | 0.225 | 1.28E-21  | 3 | HDLBP    |
| 1.12E-25  | 0.251342824 | 0.296 | 0.174 | 2.08E-21  | 3 | FDX1     |
| 1.35E-25  | 0.250907751 | 0.55  | 0.432 | 2.52E-21  | 3 | BNIP3L   |
| 6.65E-25  | 0.260760922 | 0.564 | 0.407 | 1.24E-20  | 3 | POLR2A   |
| 2.09E-24  | 0.260112457 | 0.338 | 0.203 | 3.90E-20  | 3 | LEPROTL1 |
| 3.57E-24  | 0.254884375 | 0.238 | 0.124 | 6.65E-20  | 3 | CARHSP1  |
| 6.16E-24  | 0.271710335 | 0.338 | 0.21  | 1.15E-19  | 3 | LAP3     |
| 1.64E-23  | 0.32702292  | 0.617 | 0.466 | 3.06E-19  | 3 | CD24     |
| 3.08E-23  | 0.250089409 | 0.497 | 0.369 | 5.75E-19  | 3 | RHOG     |
| 4.05E-23  | 0.263106221 | 0.324 | 0.194 | 7.55E-19  | 3 | EEA1     |
| 5.73E-23  | 0.26885732  | 0.509 | 0.37  | 1.07E-18  | 3 | WBP2     |
| 1.68E-21  | 0.275787044 | 0.394 | 0.261 | 3.14E-17  | 3 | SNX8     |
| 2.09E-21  | 0.546872163 | 0.656 | 0.508 | 3.89E-17  | 3 | HIST1H1E |
| 8.56E-21  | 0.284262844 | 0.504 | 0.369 | 1.60E-16  | 3 | NFATC1   |
| 1.19E-20  | 0.256555365 | 0.419 | 0.283 | 2.22E-16  | 3 | SFT2D1   |
| 2.47E-18  | 0.252563057 | 0.28  | 0.166 | 4.61E-14  | 3 | SLC10A3  |
| 4.70E-18  | 0.263007493 | 0.438 | 0.314 | 8.76E-14  | 3 | YWHAH    |
| 0         | 1.761977458 | 0.836 | 0.082 | 0         | 4 | LILRA4   |
| 0         | 1.563024195 | 0.944 | 0.498 | 0         | 4 | LGALS1   |
| 0         | 1.329757375 | 0.674 | 0.052 | 0         | 4 | MS4A6A   |
| 0         | 1.326484931 | 0.768 | 0.115 | 0         | 4 | LILRB4   |
| 0         | 1.317868753 | 0.976 | 0.603 | 0         | 4 | DBI      |
| 0         | 1.166687266 | 0.82  | 0.187 | 0         | 4 | LAG3     |
| 1.51E-300 | 1.033578937 | 0.841 | 0.262 | 2.81E-296 | 4 | PTMS     |
| 1.58E-298 | 0.86867511  | 0.989 | 0.695 | 2.95E-294 | 4 | CLIC1    |

|           |             |       |       |           |   |          |
|-----------|-------------|-------|-------|-----------|---|----------|
| 3.19E-294 | 1.046609951 | 0.865 | 0.279 | 5.94E-290 | 4 | YWHAH    |
| 8.51E-293 | 0.983779776 | 0.958 | 0.497 | 1.59E-288 | 4 | ANXA2    |
| 1.74E-279 | 0.955517945 | 0.971 | 0.605 | 3.24E-275 | 4 | PLP2     |
| 2.26E-275 | 1.1971482   | 0.917 | 0.488 | 4.20E-271 | 4 | GRN      |
| 4.17E-273 | 2.57227093  | 0.896 | 0.459 | 7.78E-269 | 4 | APH1A    |
| 2.80E-271 | 0.885996565 | 0.921 | 0.428 | 5.22E-267 | 4 | APOBEC3G |
| 1.90E-265 | 0.792026468 | 0.997 | 0.834 | 3.54E-261 | 4 | SH3BGRL3 |
| 5.30E-259 | 0.927234243 | 0.997 | 0.843 | 9.87E-255 | 4 | ACTG1    |
| 1.51E-256 | 0.708701334 | 0.995 | 0.807 | 2.81E-252 | 4 | RHOA     |
| 8.12E-256 | 1.106310966 | 0.98  | 0.659 | 1.51E-251 | 4 | EMP3     |
| 6.46E-252 | 0.927316137 | 0.998 | 0.876 | 1.20E-247 | 4 | VIM      |
| 2.54E-243 | 0.874831367 | 0.997 | 0.837 | 4.73E-239 | 4 | GAPDH    |
| 1.26E-235 | 0.828812796 | 0.973 | 0.58  | 2.35E-231 | 4 | ID3      |
| 1.54E-227 | 0.820453572 | 0.932 | 0.51  | 2.87E-223 | 4 | PTPN6    |
| 1.75E-227 | 1.771159027 | 0.578 | 0.119 | 3.27E-223 | 4 | SNAPC3   |
| 6.02E-226 | 0.903533972 | 0.607 | 0.091 | 1.12E-221 | 4 | CST7     |
| 2.01E-224 | 0.785503571 | 0.962 | 0.576 | 3.76E-220 | 4 | CD99     |
| 2.92E-223 | 0.781388156 | 0.973 | 0.713 | 5.44E-219 | 4 | CORO1A   |
| 2.33E-222 | 0.696215683 | 0.974 | 0.641 | 4.34E-218 | 4 | MYL12B   |
| 1.58E-220 | 0.887265201 | 0.992 | 0.788 | 2.95E-216 | 4 | S100A6   |
| 1.59E-220 | 1.406572254 | 0.606 | 0.15  | 2.96E-216 | 4 | TOR1AIP2 |
| 1.46E-219 | 2.63629693  | 0.86  | 0.456 | 2.71E-215 | 4 | ENSA     |
| 3.78E-219 | 0.700455976 | 0.899 | 0.461 | 7.04E-215 | 4 | RNH1     |
| 1.67E-213 | 1.602255575 | 0.721 | 0.264 | 3.11E-209 | 4 | CEP350   |
| 2.38E-213 | 0.727242007 | 0.994 | 0.838 | 4.44E-209 | 4 | HLA-DRB5 |
| 1.69E-211 | 0.749574918 | 0.435 | 0.022 | 3.15E-207 | 4 | CDK6     |
| 4.15E-209 | 1.235145013 | 0.559 | 0.111 | 7.74E-205 | 4 | FABP5    |
| 1.34E-203 | 0.736118464 | 0.59  | 0.127 | 2.49E-199 | 4 | COCH     |
| 1.16E-200 | 0.696769296 | 0.974 | 0.655 | 2.16E-196 | 4 | MYL12A   |
| 6.14E-200 | 1.598699754 | 0.663 | 0.236 | 1.14E-195 | 4 | RPRD2    |
| 1.08E-199 | 0.779621275 | 0.906 | 0.488 | 2.01E-195 | 4 | NDUFB2   |
| 6.03E-195 | 2.486022835 | 0.711 | 0.348 | 1.12E-190 | 4 | PSIP1    |
| 1.81E-193 | 0.67473015  | 0.983 | 0.684 | 3.37E-189 | 4 | RAC2     |
| 1.63E-190 | 0.720274974 | 0.997 | 0.865 | 3.03E-186 | 4 | CFL1     |
| 1.35E-188 | 0.701712069 | 0.968 | 0.693 | 2.51E-184 | 4 | COTL1    |
| 3.64E-188 | 0.573953873 | 0.611 | 0.133 | 6.79E-184 | 4 | RHOC     |
| 1.67E-186 | 1.032145048 | 0.845 | 0.393 | 3.11E-182 | 4 | RHOB     |
| 5.59E-186 | 0.577261314 | 0.585 | 0.123 | 1.04E-181 | 4 | DGKG     |
| 8.73E-186 | 0.722005641 | 0.985 | 0.767 | 1.63E-181 | 4 | LSP1     |
| 1.32E-185 | 1.028679528 | 0.939 | 0.613 | 2.45E-181 | 4 | S100A4   |
| 5.37E-185 | 0.471473754 | 0.484 | 0.052 | 1.00E-180 | 4 | MS4A4E   |
| 6.80E-185 | 0.580855087 | 0.869 | 0.406 | 1.27E-180 | 4 | GNB2     |
| 1.28E-184 | 0.791730938 | 0.992 | 0.829 | 2.39E-180 | 4 | AHNAK    |
| 3.23E-181 | 0.598692834 | 0.794 | 0.307 | 6.02E-177 | 4 | AP2S1    |
| 4.47E-181 | 0.592036402 | 0.674 | 0.218 | 8.34E-177 | 4 | RGS19    |
| 8.85E-181 | 0.694735656 | 0.88  | 0.441 | 1.65E-176 | 4 | TUBB     |

|           |             |       |       |           |   |          |
|-----------|-------------|-------|-------|-----------|---|----------|
| 9.49E-181 | 0.606061856 | 0.618 | 0.155 | 1.77E-176 | 4 | CNP      |
| 2.99E-176 | 0.842586359 | 0.911 | 0.535 | 5.57E-172 | 4 | LBH      |
| 8.47E-176 | 0.58021775  | 0.833 | 0.363 | 1.58E-171 | 4 | NOP10    |
| 3.39E-174 | 0.468378426 | 0.862 | 0.433 | 6.31E-170 | 4 | CSK      |
| 1.28E-172 | 0.418914409 | 0.407 | 0.037 | 2.38E-168 | 4 | C3orf14  |
| 1.10E-169 | 0.621492562 | 0.997 | 0.866 | 2.06E-165 | 4 | MYL6     |
| 3.01E-166 | 0.539614122 | 0.731 | 0.263 | 5.60E-162 | 4 | HMOX1    |
| 3.50E-163 | 0.539206478 | 0.456 | 0.08  | 6.52E-159 | 4 | DRAIC    |
| 8.89E-163 | 0.597982289 | 0.981 | 0.665 | 1.66E-158 | 4 | PCBP1    |
| 6.52E-160 | 0.640645326 | 0.704 | 0.252 | 1.22E-155 | 4 | TYMP     |
| 1.11E-159 | 0.611932061 | 0.985 | 0.772 | 2.07E-155 | 4 | FXVD5    |
| 1.25E-159 | 0.53583387  | 0.729 | 0.274 | 2.32E-155 | 4 | FAM107B  |
| 1.68E-159 | 0.51294676  | 0.998 | 0.855 | 3.14E-155 | 4 | UCP2     |
| 2.62E-158 | 0.453183363 | 0.596 | 0.176 | 4.89E-154 | 4 | PRKCD    |
| 3.30E-158 | 0.639316459 | 0.331 | 0.007 | 6.14E-154 | 4 | CA14     |
| 6.41E-158 | 0.482318507 | 0.736 | 0.275 | 1.19E-153 | 4 | TWF2     |
| 7.73E-158 | 0.612712887 | 0.528 | 0.108 | 1.44E-153 | 4 | PDCD1    |
| 1.65E-157 | 0.602395427 | 0.767 | 0.327 | 3.07E-153 | 4 | APOBEC3C |
| 2.32E-157 | 0.608939684 | 0.427 | 0.071 | 4.32E-153 | 4 | TARS2    |
| 2.68E-157 | 0.572582957 | 0.676 | 0.217 | 5.00E-153 | 4 | TP53I11  |
| 3.74E-157 | 0.586002964 | 0.991 | 0.806 | 6.97E-153 | 4 | HINT1    |
| 2.43E-154 | 0.580202732 | 0.664 | 0.224 | 4.53E-150 | 4 | SIT1     |
| 2.65E-154 | 0.644683917 | 0.642 | 0.218 | 4.95E-150 | 4 | PLEK     |
| 2.83E-154 | 0.573213758 | 0.782 | 0.365 | 5.28E-150 | 4 | CTSZ     |
| 6.85E-151 | 0.675105249 | 0.783 | 0.319 | 1.28E-146 | 4 | PLEC     |
| 2.31E-149 | 0.444924282 | 0.617 | 0.202 | 4.30E-145 | 4 | IRF5     |
| 3.01E-149 | 0.477850631 | 0.826 | 0.389 | 5.60E-145 | 4 | RBX1     |
| 8.59E-149 | 0.480073699 | 0.794 | 0.376 | 1.60E-144 | 4 | CSTB     |
| 9.40E-148 | 1.908374469 | 0.946 | 0.667 | 1.75E-143 | 4 | MCL1     |
| 4.96E-147 | 0.638444023 | 0.531 | 0.155 | 9.24E-143 | 4 | RNF38    |
| 8.60E-147 | 0.86693564  | 0.968 | 0.755 | 1.60E-142 | 4 | ZFP36L1  |
| 8.88E-146 | 0.562215697 | 0.793 | 0.345 | 1.65E-141 | 4 | NFATC1   |
| 6.98E-145 | 1.04314915  | 0.624 | 0.222 | 1.30E-140 | 4 | TOR1AIP1 |
| 1.48E-144 | 0.392061497 | 0.624 | 0.206 | 2.75E-140 | 4 | FAM50A   |
| 2.04E-139 | 0.498624624 | 0.308 | 0.011 | 3.81E-135 | 4 | GNG11    |
| 1.37E-138 | 0.474767009 | 0.722 | 0.318 | 2.56E-134 | 4 | SEM1     |
| 3.70E-138 | 0.676697295 | 0.902 | 0.562 | 6.91E-134 | 4 | PKM      |
| 5.15E-138 | 0.464052224 | 0.799 | 0.381 | 9.59E-134 | 4 | TBCB     |
| 2.62E-134 | 0.380514711 | 0.607 | 0.209 | 4.88E-130 | 4 | ILK      |
| 1.16E-133 | 0.414460146 | 0.792 | 0.379 | 2.17E-129 | 4 | ARPC1B   |
| 4.58E-133 | 0.43106151  | 0.682 | 0.265 | 8.53E-129 | 4 | DDAH2    |
| 1.17E-131 | 0.519728673 | 0.913 | 0.569 | 2.18E-127 | 4 | GDI2     |
| 5.07E-129 | 0.42666754  | 0.849 | 0.439 | 9.45E-125 | 4 | GNG5     |
| 3.59E-128 | 0.48326494  | 0.819 | 0.398 | 6.69E-124 | 4 | ARF6     |
| 3.89E-128 | 0.399287281 | 0.451 | 0.109 | 7.24E-124 | 4 | SH3BP2   |
| 4.60E-128 | 0.413730041 | 0.855 | 0.467 | 8.57E-124 | 4 | INPP5F   |

|           |             |       |       |           |   |          |
|-----------|-------------|-------|-------|-----------|---|----------|
| 2.29E-126 | 0.508546813 | 0.843 | 0.449 | 4.26E-122 | 4 | PGAM1    |
| 1.67E-125 | 0.390078844 | 0.557 | 0.177 | 3.10E-121 | 4 | TRAF7    |
| 2.38E-125 | 0.448837782 | 0.887 | 0.496 | 4.44E-121 | 4 | CAP1     |
| 2.67E-125 | 0.446955987 | 0.33  | 0.038 | 4.98E-121 | 4 | IL2RB    |
| 1.42E-124 | 0.51107527  | 0.765 | 0.348 | 2.64E-120 | 4 | VASP     |
| 2.11E-124 | 0.485008388 | 0.471 | 0.129 | 3.93E-120 | 4 | CXCR3    |
| 2.50E-124 | 0.550524659 | 0.723 | 0.311 | 4.66E-120 | 4 | BANF1    |
| 4.09E-124 | 0.460545692 | 0.909 | 0.571 | 7.62E-120 | 4 | POU2F2   |
| 1.89E-123 | 0.388163318 | 0.628 | 0.222 | 3.52E-119 | 4 | PPP1R18  |
| 2.56E-123 | 0.789905429 | 0.832 | 0.473 | 4.77E-119 | 4 | MRPS21   |
| 3.83E-123 | 0.539127108 | 0.318 | 0.035 | 7.14E-119 | 4 | MGLL     |
| 4.35E-123 | 0.406919635 | 0.488 | 0.124 | 8.10E-119 | 4 | SPN      |
| 1.02E-122 | 0.341377627 | 0.316 | 0.03  | 1.90E-118 | 4 | PDPN     |
| 3.98E-122 | 0.40083139  | 0.927 | 0.586 | 7.43E-118 | 4 | CAST     |
| 9.97E-122 | 0.42643612  | 0.883 | 0.526 | 1.86E-117 | 4 | PPP1CA   |
| 1.01E-121 | 0.328749282 | 0.572 | 0.187 | 1.88E-117 | 4 | IDH3G    |
| 5.87E-121 | 0.353809152 | 0.824 | 0.426 | 1.09E-116 | 4 | ARL6IP5  |
| 6.57E-121 | 0.308027042 | 0.446 | 0.11  | 1.22E-116 | 4 | FUOM     |
| 1.59E-120 | 0.419707575 | 0.418 | 0.099 | 2.96E-116 | 4 | MYL9     |
| 5.53E-120 | 0.396019304 | 0.346 | 0.046 | 1.03E-115 | 4 | JUP      |
| 8.25E-120 | 0.442005276 | 0.789 | 0.373 | 1.54E-115 | 4 | ARHGAP30 |
| 8.95E-120 | 0.579771836 | 0.861 | 0.491 | 1.67E-115 | 4 | RAC1     |
| 9.19E-120 | 0.635958722 | 0.719 | 0.334 | 1.71E-115 | 4 | SPIB     |
| 2.88E-119 | 0.502981966 | 0.979 | 0.743 | 5.36E-115 | 4 | SYNGR2   |
| 6.52E-119 | 1.162684911 | 0.319 | 0.04  | 1.21E-114 | 4 | CCL3     |
| 3.07E-118 | 0.372934163 | 0.664 | 0.267 | 5.72E-114 | 4 | MRPL51   |
| 4.12E-118 | 0.450620634 | 0.77  | 0.377 | 7.68E-114 | 4 | RAB11A   |
| 8.18E-118 | 0.33748444  | 0.346 | 0.051 | 1.52E-113 | 4 | SULF2    |
| 1.56E-117 | 0.337130318 | 0.468 | 0.117 | 2.92E-113 | 4 | SSBP2    |
| 5.91E-117 | 0.46767137  | 0.99  | 0.821 | 1.10E-112 | 4 | PFN1     |
| 1.64E-116 | 0.444699081 | 0.813 | 0.411 | 3.05E-112 | 4 | R3HDM4   |
| 1.65E-116 | 0.457587257 | 0.811 | 0.429 | 3.07E-112 | 4 | DAD1     |
| 3.67E-116 | 0.319881827 | 0.626 | 0.248 | 6.83E-112 | 4 | MGAT1    |
| 6.64E-116 | 0.421463302 | 0.686 | 0.286 | 1.24E-111 | 4 | SPI1     |
| 2.72E-115 | 0.361438403 | 0.762 | 0.391 | 5.07E-111 | 4 | ARPC5    |
| 3.31E-115 | 0.40472218  | 0.838 | 0.474 | 6.18E-111 | 4 | COX5A    |
| 4.19E-115 | 0.374023759 | 0.739 | 0.346 | 7.81E-111 | 4 | FLOT2    |
| 5.85E-115 | 0.386128806 | 0.772 | 0.378 | 1.09E-110 | 4 | DDOST    |
| 7.27E-115 | 0.377634646 | 0.587 | 0.211 | 1.35E-110 | 4 | ELOVL1   |
| 8.19E-115 | 0.383448129 | 0.461 | 0.107 | 1.53E-110 | 4 | HIVEP3   |
| 1.33E-114 | 0.314409539 | 0.682 | 0.277 | 2.48E-110 | 4 | FGD2     |
| 8.87E-113 | 0.486236537 | 0.894 | 0.529 | 1.65E-108 | 4 | PSMA7    |
| 8.59E-112 | 0.397665365 | 0.277 | 0.026 | 1.60E-107 | 4 | CCDC171  |
| 1.32E-111 | 0.353948444 | 0.446 | 0.116 | 2.45E-107 | 4 | PLBD1    |
| 3.89E-111 | 0.318603594 | 0.399 | 0.092 | 7.26E-107 | 4 | IL6R     |
| 5.53E-111 | 0.417141238 | 0.616 | 0.248 | 1.03E-106 | 4 | PIGR     |

|           |             |       |       |           |   |            |
|-----------|-------------|-------|-------|-----------|---|------------|
| 1.34E-110 | 0.296140685 | 0.931 | 0.602 | 2.49E-106 | 4 | NEAT1      |
| 1.35E-110 | 0.471300457 | 0.869 | 0.501 | 2.52E-106 | 4 | PDLIM1     |
| 6.86E-109 | 0.320215206 | 0.581 | 0.238 | 1.28E-104 | 4 | MYO1G      |
| 4.02E-108 | 0.33935456  | 0.655 | 0.285 | 7.48E-104 | 4 | DCTN2      |
| 6.32E-108 | 0.318385446 | 0.646 | 0.256 | 1.18E-103 | 4 | PCMT1      |
| 1.03E-107 | 0.377822853 | 0.763 | 0.37  | 1.92E-103 | 4 | PRDX5      |
| 3.16E-107 | 0.32886191  | 0.653 | 0.273 | 5.89E-103 | 4 | TPP1       |
| 3.56E-107 | 0.406146441 | 0.647 | 0.268 | 6.64E-103 | 4 | PIK3AP1    |
| 4.39E-107 | 0.549595585 | 0.883 | 0.537 | 8.19E-103 | 4 | TPI1       |
| 4.25E-106 | 0.408959088 | 0.642 | 0.252 | 7.93E-102 | 4 | GBP2       |
| 1.15E-105 | 0.363798715 | 0.687 | 0.282 | 2.15E-101 | 4 | MVP        |
| 1.23E-105 | 0.441201765 | 0.968 | 0.696 | 2.30E-101 | 4 | CALM2      |
| 2.16E-105 | 0.319982922 | 0.465 | 0.134 | 4.03E-101 | 4 | WSB2       |
| 1.39E-104 | 0.413527339 | 0.79  | 0.383 | 2.60E-100 | 4 | ANXA5      |
| 4.73E-104 | 0.388076547 | 0.83  | 0.463 | 8.81E-100 | 4 | ALDOA      |
| 1.65E-103 | 0.301449483 | 0.516 | 0.196 | 3.08E-99  | 4 | ITPA       |
| 5.80E-103 | 0.305657337 | 0.359 | 0.064 | 1.08E-98  | 4 | BCAR3      |
| 2.47E-102 | 0.319885358 | 0.545 | 0.181 | 4.60E-98  | 4 | ORMDL2     |
| 2.92E-102 | 0.342648559 | 0.69  | 0.296 | 5.44E-98  | 4 | ESYT1      |
| 2.94E-102 | 0.326193906 | 0.614 | 0.226 | 5.49E-98  | 4 | HMOX2      |
| 2.95E-102 | 0.377567225 | 0.942 | 0.614 | 5.50E-98  | 4 | CD44       |
| 4.33E-102 | 0.560217426 | 0.908 | 0.567 | 8.08E-98  | 4 | CYB561A3   |
| 6.35E-102 | 0.293374127 | 0.479 | 0.142 | 1.18E-97  | 4 | DCTPP1     |
| 7.64E-101 | 0.339453947 | 0.541 | 0.191 | 1.42E-96  | 4 | LYSMD2     |
| 1.17E-100 | 0.385180942 | 0.75  | 0.379 | 2.17E-96  | 4 | RGS10      |
| 1.97E-100 | 0.41955601  | 0.638 | 0.254 | 3.67E-96  | 4 | PFKP       |
| 2.84E-100 | 0.308486935 | 0.617 | 0.244 | 5.29E-96  | 4 | MYO1E      |
| 2.89E-100 | 0.574831461 | 0.965 | 0.775 | 5.39E-96  | 4 | PPDPF      |
| 3.56E-100 | 0.797792747 | 0.829 | 0.553 | 6.64E-96  | 4 | FLNA       |
| 1.98E-99  | 0.313577454 | 0.575 | 0.214 | 3.68E-95  | 4 | HSBP1      |
| 2.11E-99  | 0.347732129 | 0.661 | 0.284 | 3.93E-95  | 4 | NAPSA      |
| 2.85E-99  | 0.460614151 | 0.275 | 0.028 | 5.31E-95  | 4 | AL353708.3 |
| 6.19E-99  | 0.297478298 | 0.639 | 0.281 | 1.15E-94  | 4 | MAP4       |
| 2.90E-98  | 0.302743813 | 0.657 | 0.286 | 5.41E-94  | 4 | LINC01480  |
| 3.11E-98  | 0.45202847  | 0.987 | 0.787 | 5.80E-94  | 4 | TAGLN2     |
| 5.47E-98  | 0.371202711 | 0.524 | 0.187 | 1.02E-93  | 4 | ADAM8      |
| 1.39E-97  | 0.422013457 | 0.792 | 0.415 | 2.59E-93  | 4 | AP2M1      |
| 1.66E-97  | 0.373305916 | 0.923 | 0.619 | 3.10E-93  | 4 | COX6C      |
| 2.83E-96  | 0.422987604 | 0.814 | 0.439 | 5.28E-92  | 4 | CAPG       |
| 3.75E-96  | 0.386272283 | 0.908 | 0.604 | 6.99E-92  | 4 | CNN2       |
| 1.02E-95  | 0.37860993  | 0.655 | 0.311 | 1.90E-91  | 4 | FKBP1A     |
| 2.09E-95  | 0.314065555 | 0.774 | 0.393 | 3.89E-91  | 4 | CLTA       |
| 2.37E-95  | 0.357147588 | 0.557 | 0.197 | 4.42E-91  | 4 | FERMT3     |
| 5.96E-95  | 0.346144771 | 0.561 | 0.205 | 1.11E-90  | 4 | PYCARD     |
| 1.08E-94  | 0.728271407 | 0.551 | 0.27  | 2.01E-90  | 4 | HLA-DQA2   |
| 4.04E-94  | 0.44568192  | 0.893 | 0.557 | 7.52E-90  | 4 | CD27       |

|          |             |       |       |          |   |          |
|----------|-------------|-------|-------|----------|---|----------|
| 5.33E-94 | 0.257264708 | 0.512 | 0.196 | 9.93E-90 | 4 | DECR1    |
| 7.67E-94 | 0.304061815 | 0.872 | 0.519 | 1.43E-89 | 4 | LRMP     |
| 1.98E-93 | 0.426571948 | 0.577 | 0.24  | 3.69E-89 | 4 | RUNX3    |
| 3.65E-93 | 0.380365964 | 0.641 | 0.263 | 6.79E-89 | 4 | LSM10    |
| 5.08E-93 | 0.306062733 | 0.445 | 0.126 | 9.47E-89 | 4 | BMP2K    |
| 1.28E-92 | 0.398567208 | 0.751 | 0.381 | 2.39E-88 | 4 | DYNLRB1  |
| 1.76E-92 | 0.308321928 | 0.744 | 0.37  | 3.28E-88 | 4 | ADRM1    |
| 3.72E-92 | 0.288486885 | 0.538 | 0.203 | 6.94E-88 | 4 | CCDC107  |
| 4.69E-92 | 0.264709178 | 0.354 | 0.083 | 8.74E-88 | 4 | SYT17    |
| 6.93E-92 | 0.4395625   | 0.651 | 0.303 | 1.29E-87 | 4 | CD40     |
| 8.93E-92 | 0.289988955 | 0.519 | 0.196 | 1.67E-87 | 4 | ITGB1BP1 |
| 1.02E-91 | 0.513770594 | 0.519 | 0.187 | 1.91E-87 | 4 | PTGER4   |
| 1.15E-91 | 0.295960243 | 0.619 | 0.259 | 2.14E-87 | 4 | NDUFAB1  |
| 2.35E-91 | 0.305307808 | 0.757 | 0.385 | 4.39E-87 | 4 | BCAP31   |
| 5.12E-91 | 0.272867706 | 0.705 | 0.341 | 9.54E-87 | 4 | REEP5    |
| 7.47E-91 | 0.728824185 | 0.648 | 0.314 | 1.39E-86 | 4 | MIR155HG |
| 1.92E-90 | 0.36288907  | 0.827 | 0.457 | 3.58E-86 | 4 | ARF5     |
| 2.24E-90 | 0.4943958   | 0.444 | 0.14  | 4.17E-86 | 4 | SEMA7A   |
| 2.73E-90 | 0.307702933 | 0.445 | 0.153 | 5.10E-86 | 4 | SLC10A3  |
| 4.63E-90 | 0.575254801 | 0.237 | 0.028 | 8.62E-86 | 4 | IL4I1    |
| 1.00E-89 | 0.285841461 | 0.528 | 0.208 | 1.87E-85 | 4 | IAH1     |
| 1.07E-89 | 0.383666294 | 0.797 | 0.425 | 1.99E-85 | 4 | PSMB3    |
| 1.11E-89 | 0.414881273 | 0.887 | 0.575 | 2.06E-85 | 4 | GPSM3    |
| 4.60E-89 | 0.273207947 | 0.305 | 0.054 | 8.58E-85 | 4 | DOK2     |
| 1.27E-88 | 0.271904842 | 0.322 | 0.064 | 2.37E-84 | 4 | GYS1     |
| 1.97E-88 | 0.337688714 | 0.239 | 0.024 | 3.66E-84 | 4 | RGS7     |
| 2.12E-88 | 0.592993839 | 0.488 | 0.194 | 3.95E-84 | 4 | CD72     |
| 4.17E-88 | 0.296243421 | 0.399 | 0.126 | 7.77E-84 | 4 | ACAT2    |
| 1.50E-87 | 0.344368075 | 0.758 | 0.42  | 2.79E-83 | 4 | SMIM14   |
| 1.99E-87 | 0.253806146 | 0.48  | 0.176 | 3.72E-83 | 4 | TNIP2    |
| 8.67E-87 | 0.347001774 | 0.882 | 0.574 | 1.62E-82 | 4 | SSR4     |
| 4.37E-86 | 0.29674859  | 0.457 | 0.153 | 8.15E-82 | 4 | SLC35B2  |
| 4.65E-86 | 0.380139224 | 0.787 | 0.429 | 8.67E-82 | 4 | NDUFB2   |
| 5.46E-86 | 0.382708053 | 0.26  | 0.025 | 1.02E-81 | 4 | PLD4     |
| 1.34E-85 | 0.320006724 | 0.568 | 0.214 | 2.50E-81 | 4 | SREBF2   |
| 1.88E-85 | 0.297018637 | 0.573 | 0.224 | 3.51E-81 | 4 | C11orf24 |
| 2.46E-85 | 0.430415464 | 0.578 | 0.223 | 4.59E-81 | 4 | TMBIM1   |
| 4.71E-85 | 0.426812713 | 0.742 | 0.379 | 8.77E-81 | 4 | LIMS1    |
| 4.83E-85 | 0.706432359 | 0.567 | 0.318 | 8.99E-81 | 4 | S100A11  |
| 5.70E-85 | 0.309970233 | 0.459 | 0.132 | 1.06E-80 | 4 | PRDX3    |
| 1.35E-84 | 0.253683947 | 0.519 | 0.2   | 2.52E-80 | 4 | CLIC4    |
| 2.46E-84 | 0.344625203 | 0.713 | 0.367 | 4.58E-80 | 4 | TAP1     |
| 2.46E-84 | 0.27262537  | 0.638 | 0.279 | 4.59E-80 | 4 | CDC42EP3 |
| 5.37E-84 | 0.647624207 | 0.801 | 0.451 | 1.00E-79 | 4 | CD24     |
| 6.28E-84 | 0.2646624   | 0.21  | 0.01  | 1.17E-79 | 4 | RSPO1    |
| 1.85E-83 | 0.309094223 | 0.734 | 0.381 | 3.45E-79 | 4 | CCT3     |

|          |             |       |       |          |   |          |
|----------|-------------|-------|-------|----------|---|----------|
| 1.95E-83 | 0.275351371 | 0.61  | 0.281 | 3.63E-79 | 4 | BAX      |
| 2.08E-83 | 0.395914319 | 0.887 | 0.543 | 3.89E-79 | 4 | DYNLL1   |
| 2.10E-83 | 0.297206416 | 0.411 | 0.119 | 3.92E-79 | 4 | PARVB    |
| 2.43E-83 | 0.331210454 | 0.666 | 0.324 | 4.53E-79 | 4 | TALDO1   |
| 3.11E-83 | 0.291594554 | 0.611 | 0.273 | 5.80E-79 | 4 | SIDT2    |
| 7.10E-83 | 0.263129972 | 0.58  | 0.26  | 1.32E-78 | 4 | PDCD5    |
| 1.30E-82 | 0.267692015 | 0.752 | 0.406 | 2.43E-78 | 4 | GNAI2    |
| 1.35E-82 | 0.324751897 | 0.696 | 0.346 | 2.52E-78 | 4 | CORO1B   |
| 1.67E-82 | 0.346983919 | 0.671 | 0.335 | 3.12E-78 | 4 | CDK2AP2  |
| 2.84E-82 | 0.37155337  | 0.913 | 0.555 | 5.29E-78 | 4 | PRDX1    |
| 3.95E-82 | 0.263032418 | 0.509 | 0.203 | 7.36E-78 | 4 | CAPNS1   |
| 7.32E-82 | 0.264287545 | 0.3   | 0.06  | 1.37E-77 | 4 | WNT3     |
| 7.51E-82 | 0.251484323 | 0.484 | 0.166 | 1.40E-77 | 4 | CD58     |
| 1.01E-81 | 0.285091118 | 0.627 | 0.288 | 1.89E-77 | 4 | PSMA4    |
| 1.12E-81 | 0.325344562 | 0.762 | 0.386 | 2.08E-77 | 4 | LDHA     |
| 1.65E-81 | 0.382381172 | 0.198 | 0.01  | 3.07E-77 | 4 | UCHL1    |
| 2.41E-81 | 0.673904752 | 0.307 | 0.06  | 4.49E-77 | 4 | CCL4     |
| 2.54E-81 | 0.256539974 | 0.485 | 0.166 | 4.74E-77 | 4 | RGS14    |
| 2.74E-81 | 0.358960512 | 0.976 | 0.745 | 5.10E-77 | 4 | CYBA     |
| 3.15E-81 | 0.356152064 | 0.8   | 0.424 | 5.87E-77 | 4 | ATP5MD   |
| 1.45E-80 | 0.364802524 | 0.888 | 0.559 | 2.71E-76 | 4 | SNX3     |
| 1.58E-80 | 0.303138715 | 0.676 | 0.301 | 2.95E-76 | 4 | VDAC1    |
| 2.19E-80 | 0.281432247 | 0.221 | 0.018 | 4.08E-76 | 4 | FAM129A  |
| 2.54E-80 | 0.3622603   | 0.829 | 0.478 | 4.74E-76 | 4 | ENO1     |
| 3.25E-80 | 0.316962524 | 0.491 | 0.167 | 6.05E-76 | 4 | ICAM2    |
| 1.23E-79 | 0.266069874 | 0.511 | 0.191 | 2.29E-75 | 4 | C4orf48  |
| 1.40E-79 | 0.277217843 | 0.877 | 0.536 | 2.62E-75 | 4 | ACTR3    |
| 1.67E-79 | 0.274562744 | 0.624 | 0.28  | 3.11E-75 | 4 | NDUFA12  |
| 2.93E-79 | 0.37186083  | 0.674 | 0.333 | 5.47E-75 | 4 | FDFT1    |
| 3.66E-79 | 0.281181906 | 0.832 | 0.464 | 6.82E-75 | 4 | KRAS     |
| 4.45E-79 | 0.339131387 | 0.753 | 0.41  | 8.29E-75 | 4 | ATOX1    |
| 5.40E-79 | 0.278982699 | 0.614 | 0.273 | 1.01E-74 | 4 | PSMB2    |
| 7.91E-79 | 0.306467092 | 0.893 | 0.546 | 1.47E-74 | 4 | ATP6V0E1 |
| 2.29E-78 | 0.294153126 | 0.751 | 0.391 | 4.27E-74 | 4 | NPC2     |
| 9.76E-78 | 0.2698542   | 0.696 | 0.347 | 1.82E-73 | 4 | ATP5PD   |
| 1.79E-77 | 0.32335078  | 0.988 | 0.811 | 3.34E-73 | 4 | ARPC3    |
| 5.10E-77 | 0.279993764 | 0.568 | 0.25  | 9.51E-73 | 4 | FLOT1    |
| 7.23E-77 | 0.298226465 | 0.866 | 0.511 | 1.35E-72 | 4 | HNRNPF   |
| 7.35E-77 | 0.359319174 | 0.378 | 0.138 | 1.37E-72 | 4 | CD68     |
| 9.46E-77 | 0.30571865  | 0.375 | 0.111 | 1.76E-72 | 4 | MSMO1    |
| 2.36E-76 | 0.362134864 | 0.403 | 0.136 | 4.40E-72 | 4 | BBC3     |
| 2.81E-76 | 0.6238953   | 0.272 | 0.053 | 5.23E-72 | 4 | AQP3     |
| 3.99E-76 | 0.324161364 | 0.612 | 0.278 | 7.44E-72 | 4 | RHOF     |
| 5.11E-76 | 0.278111277 | 0.675 | 0.33  | 9.53E-72 | 4 | FMNL1    |
| 8.00E-76 | 0.309858782 | 0.985 | 0.818 | 1.49E-71 | 4 | LIMD2    |
| 1.12E-75 | 0.322989077 | 0.6   | 0.257 | 2.08E-71 | 4 | SCIMP    |



|          |             |       |       |          |   |           |
|----------|-------------|-------|-------|----------|---|-----------|
| 1.19E-75 | 0.310618056 | 0.149 | 0.003 | 2.23E-71 | 4 | POSTN     |
| 1.64E-75 | 0.259535554 | 0.797 | 0.457 | 3.05E-71 | 4 | CAPZB     |
| 2.05E-75 | 0.299804214 | 0.606 | 0.279 | 3.82E-71 | 4 | EIF6      |
| 1.50E-74 | 0.251795134 | 0.783 | 0.441 | 2.80E-70 | 4 | COPE      |
| 3.46E-74 | 0.497139408 | 0.549 | 0.256 | 6.44E-70 | 4 | GRHPR     |
| 9.66E-74 | 0.37204383  | 0.7   | 0.361 | 1.80E-69 | 4 | CD5       |
| 1.11E-72 | 0.287493125 | 0.943 | 0.652 | 2.06E-68 | 4 | TRIR      |
| 4.77E-72 | 0.361023797 | 0.498 | 0.182 | 8.88E-68 | 4 | SQLE      |
| 7.00E-72 | 0.306698995 | 0.617 | 0.297 | 1.31E-67 | 4 | MIEN1     |
| 7.37E-72 | 0.260472211 | 0.497 | 0.194 | 1.37E-67 | 4 | KRCC1     |
| 9.19E-72 | 0.261543133 | 0.804 | 0.47  | 1.71E-67 | 4 | PRELID1   |
| 1.28E-71 | 0.467263447 | 0.68  | 0.394 | 2.38E-67 | 4 | TSPO      |
| 1.38E-71 | 0.268441243 | 0.717 | 0.356 | 2.57E-67 | 4 | SHMT2     |
| 2.81E-71 | 0.254678319 | 0.897 | 0.593 | 5.23E-67 | 4 | TSTD1     |
| 3.08E-71 | 0.320470508 | 0.599 | 0.282 | 5.73E-67 | 4 | H1FX      |
| 1.18E-70 | 0.252353819 | 0.67  | 0.302 | 2.21E-66 | 4 | UBE2A     |
| 1.75E-70 | 0.306353368 | 0.74  | 0.407 | 3.27E-66 | 4 | POMP      |
| 3.10E-70 | 0.288532304 | 0.713 | 0.356 | 5.79E-66 | 4 | CCT6A     |
| 2.72E-69 | 0.325755493 | 0.906 | 0.583 | 5.07E-65 | 4 | ARHGDI1   |
| 5.89E-69 | 0.281615486 | 0.581 | 0.267 | 1.10E-64 | 4 | NFATC2    |
| 7.28E-69 | 0.28307683  | 0.86  | 0.512 | 1.36E-64 | 4 | GABARAPL2 |
| 1.68E-68 | 0.25928447  | 0.526 | 0.217 | 3.13E-64 | 4 | TKT       |
| 4.45E-68 | 0.273393397 | 0.803 | 0.477 | 8.30E-64 | 4 | HLA-F     |
| 1.45E-67 | 0.289838232 | 0.406 | 0.141 | 2.71E-63 | 4 | VSIR      |
| 1.46E-67 | 0.303973289 | 0.924 | 0.645 | 2.73E-63 | 4 | UQCRH     |
| 1.74E-67 | 0.35168402  | 0.781 | 0.458 | 3.25E-63 | 4 | EMD       |
| 2.78E-67 | 0.28157819  | 0.231 | 0.05  | 5.17E-63 | 4 | RASSF6    |
| 2.90E-67 | 0.290786775 | 0.161 | 0.004 | 5.40E-63 | 4 | CAVIN1    |
| 2.90E-67 | 0.253779013 | 0.865 | 0.558 | 5.40E-63 | 4 | PSAP      |
| 5.37E-67 | 0.261907538 | 0.47  | 0.194 | 1.00E-62 | 4 | GRK6      |
| 7.06E-67 | 0.329639105 | 0.315 | 0.076 | 1.32E-62 | 4 | BID       |
| 1.38E-66 | 0.251928003 | 0.702 | 0.366 | 2.57E-62 | 4 | ITGB7     |
| 2.89E-66 | 0.292419707 | 0.847 | 0.517 | 5.39E-62 | 4 | TRMT112   |
| 4.41E-66 | 0.274985398 | 0.896 | 0.607 | 8.21E-62 | 4 | UBL5      |
| 4.46E-66 | 0.259968885 | 0.851 | 0.527 | 8.31E-62 | 4 | PSMB1     |
| 6.85E-65 | 0.379674712 | 0.607 | 0.295 | 1.28E-60 | 4 | ZBTB32    |
| 1.46E-64 | 0.261391404 | 0.633 | 0.311 | 2.73E-60 | 4 | PDIA6     |
| 7.14E-64 | 0.279966218 | 0.554 | 0.26  | 1.33E-59 | 4 | BST2      |
| 9.10E-64 | 0.318335623 | 0.668 | 0.367 | 1.70E-59 | 4 | PSME2     |
| 2.59E-63 | 0.262856671 | 0.688 | 0.351 | 4.82E-59 | 4 | NDUFB10   |
| 3.53E-63 | 0.290433555 | 0.842 | 0.505 | 6.58E-59 | 4 | RELB      |
| 6.98E-63 | 0.345585894 | 0.909 | 0.622 | 1.30E-58 | 4 | NOSIP     |
| 1.66E-62 | 0.270041609 | 0.329 | 0.1   | 3.10E-58 | 4 | RNASE6    |
| 3.97E-62 | 0.292842965 | 0.626 | 0.318 | 7.39E-58 | 4 | NCF4      |
| 6.89E-62 | 0.297444069 | 0.903 | 0.601 | 1.28E-57 | 4 | SLC25A5   |
| 1.86E-61 | 0.258092354 | 0.17  | 0.015 | 3.48E-57 | 4 | ACY3      |

|           |             |       |       |           |   |          |
|-----------|-------------|-------|-------|-----------|---|----------|
| 2.84E-61  | 0.274419753 | 0.746 | 0.383 | 5.29E-57  | 4 | MAT2B    |
| 7.85E-59  | 0.273306319 | 0.762 | 0.443 | 1.46E-54  | 4 | ATP5MF   |
| 4.82E-58  | 0.30155295  | 0.577 | 0.29  | 8.99E-54  | 4 | ACP5     |
| 8.97E-58  | 0.254072468 | 0.662 | 0.354 | 1.67E-53  | 4 | TRAF4    |
| 1.28E-57  | 0.484190665 | 0.539 | 0.277 | 2.39E-53  | 4 | BHLHE40  |
| 2.52E-57  | 0.251919835 | 0.41  | 0.17  | 4.70E-53  | 4 | SLC7A7   |
| 1.95E-56  | 0.297276105 | 0.454 | 0.183 | 3.63E-52  | 4 | IRF4     |
| 2.69E-56  | 0.274184303 | 0.828 | 0.524 | 5.02E-52  | 4 | PARK7    |
| 1.65E-55  | 0.266590082 | 0.559 | 0.264 | 3.08E-51  | 4 | MARCKSL1 |
| 4.11E-55  | 0.291760387 | 0.237 | 0.057 | 7.65E-51  | 4 | BIK      |
| 4.30E-55  | 0.272105611 | 0.563 | 0.291 | 8.01E-51  | 4 | ATF5     |
| 2.03E-54  | 0.296934483 | 0.948 | 0.707 | 3.79E-50  | 4 | MIF      |
| 2.28E-54  | 0.254922047 | 0.931 | 0.687 | 4.25E-50  | 4 | UBE2D2   |
| 2.52E-53  | 0.254667593 | 0.977 | 0.782 | 4.69E-49  | 4 | YBX1     |
| 5.64E-53  | 0.366000003 | 0.743 | 0.484 | 1.05E-48  | 4 | MS4A1    |
| 9.66E-51  | 0.268439982 | 0.76  | 0.472 | 1.80E-46  | 4 | PSMB9    |
| 3.63E-49  | 0.283655677 | 0.989 | 0.874 | 6.76E-45  | 4 | HLA-DQA1 |
| 3.63E-48  | 0.843427214 | 0.636 | 0.468 | 6.76E-44  | 4 | TCL1A    |
| 4.34E-46  | 0.273595142 | 0.726 | 0.409 | 8.09E-42  | 4 | ATP5PF   |
| 1.08E-44  | 0.302484059 | 0.786 | 0.543 | 2.02E-40  | 4 | FCRLA    |
| 1.99E-44  | 0.269688255 | 0.92  | 0.66  | 3.71E-40  | 4 | TUBA1B   |
| 6.68E-42  | 0.292954485 | 0.554 | 0.312 | 1.24E-37  | 4 | RAB29    |
| 1.69E-40  | 0.300021805 | 0.271 | 0.089 | 3.15E-36  | 4 | CD9      |
| 2.54E-39  | 0.299933813 | 0.149 | 0.024 | 4.74E-35  | 4 | CD1C     |
| 1.50E-36  | 0.620202892 | 0.667 | 0.514 | 2.80E-32  | 4 | S100A10  |
| 2.00E-36  | 0.436365883 | 0.752 | 0.527 | 3.73E-32  | 4 | IDS      |
| 8.20E-238 | 0.890681433 | 0.999 | 0.87  | 1.53E-233 | 5 | EZR      |
| 1.94E-182 | 0.62250741  | 0.994 | 0.788 | 3.61E-178 | 5 | TAGLN2   |
| 5.94E-151 | 0.563205349 | 0.713 | 0.263 | 1.11E-146 | 5 | ARID5A   |
| 1.07E-146 | 0.771103526 | 0.937 | 0.679 | 1.99E-142 | 5 | LITAF    |
| 5.83E-140 | 0.908954586 | 0.913 | 0.666 | 1.09E-135 | 5 | EMP3     |
| 5.13E-138 | 0.594885851 | 0.66  | 0.249 | 9.56E-134 | 5 | CYSTM1   |
| 9.91E-135 | 0.604371859 | 0.786 | 0.423 | 1.85E-130 | 5 | MBP      |
| 7.97E-134 | 0.631580733 | 0.807 | 0.443 | 1.48E-129 | 5 | TPM4     |
| 1.45E-130 | 0.526965766 | 0.964 | 0.698 | 2.71E-126 | 5 | CALM2    |
| 1.09E-127 | 0.506168875 | 0.719 | 0.324 | 2.04E-123 | 5 | ACSM3    |
| 6.33E-127 | 0.699432535 | 0.936 | 0.696 | 1.18E-122 | 5 | SRGN     |
| 8.55E-126 | 0.468648231 | 0.987 | 0.832 | 1.59E-121 | 5 | CALM1    |
| 8.31E-125 | 0.66635415  | 0.886 | 0.603 | 1.55E-120 | 5 | LRRFIP1  |
| 1.30E-124 | 0.459517918 | 0.926 | 0.585 | 2.41E-120 | 5 | ID3      |
| 1.37E-123 | 0.451192811 | 0.921 | 0.617 | 2.55E-119 | 5 | CD44     |
| 1.37E-122 | 0.47588453  | 0.643 | 0.244 | 2.55E-118 | 5 | SKIL     |
| 2.15E-120 | 0.320130403 | 0.993 | 0.798 | 4.00E-116 | 5 | CXCR4    |
| 8.93E-118 | 0.42149297  | 0.72  | 0.361 | 1.66E-113 | 5 | TGIF1    |
| 3.01E-117 | 0.491793767 | 0.843 | 0.514 | 5.62E-113 | 5 | NR3C1    |
| 8.64E-117 | 0.344628134 | 0.858 | 0.444 | 1.61E-112 | 5 | LMNA     |

|           |             |       |       |           |   |           |
|-----------|-------------|-------|-------|-----------|---|-----------|
| 8.25E-113 | 0.516328075 | 0.684 | 0.321 | 1.54E-108 | 5 | SLBP      |
| 1.02E-111 | 0.808711518 | 0.472 | 0.156 | 1.89E-107 | 5 | NMB       |
| 1.40E-109 | 0.504871261 | 0.906 | 0.583 | 2.61E-105 | 5 | SPOCK2    |
| 2.93E-109 | 0.474741003 | 0.871 | 0.519 | 5.46E-105 | 5 | IDS       |
| 2.71E-106 | 0.644867188 | 0.645 | 0.288 | 5.04E-102 | 5 | CREM      |
| 9.04E-106 | 0.448194108 | 0.737 | 0.371 | 1.69E-101 | 5 | SYAP1     |
| 2.79E-104 | 0.480453149 | 0.76  | 0.402 | 5.20E-100 | 5 | PIM1      |
| 9.89E-102 | 0.43722684  | 0.691 | 0.317 | 1.84E-97  | 5 | FYTDD1    |
| 1.62E-100 | 0.597532761 | 0.766 | 0.485 | 3.03E-96  | 5 | TESC      |
| 1.77E-100 | 0.458656176 | 0.482 | 0.159 | 3.30E-96  | 5 | CXCL16    |
| 2.33E-100 | 0.308329909 | 0.685 | 0.331 | 4.34E-96  | 5 | GNB5      |
| 1.37E-98  | 0.276894625 | 0.695 | 0.339 | 2.56E-94  | 5 | KDM6B     |
| 2.00E-98  | 0.320130147 | 0.968 | 0.663 | 3.74E-94  | 5 | CD55      |
| 8.53E-98  | 0.37506118  | 0.426 | 0.119 | 1.59E-93  | 5 | GABARAPL1 |
| 4.04E-96  | 0.457583326 | 0.807 | 0.481 | 7.53E-92  | 5 | EHMT1     |
| 1.65E-95  | 0.439634451 | 0.879 | 0.57  | 3.08E-91  | 5 | CYTIP     |
| 8.73E-92  | 0.427777965 | 0.521 | 0.199 | 1.63E-87  | 5 | LSR       |
| 2.34E-91  | 0.349642336 | 0.621 | 0.258 | 4.36E-87  | 5 | GLUL      |
| 4.60E-91  | 0.3946014   | 0.844 | 0.552 | 8.57E-87  | 5 | GNG2      |
| 1.60E-89  | 0.534639454 | 0.706 | 0.376 | 2.99E-85  | 5 | TMEM123   |
| 1.85E-88  | 0.554748403 | 0.797 | 0.512 | 3.46E-84  | 5 | ANXA2     |
| 4.34E-87  | 0.272769373 | 0.432 | 0.158 | 8.09E-83  | 5 | RFTN1     |
| 2.84E-84  | 0.548570131 | 0.77  | 0.483 | 5.29E-80  | 5 | TNFRSF1B  |
| 1.38E-83  | 0.317922105 | 0.729 | 0.418 | 2.57E-79  | 5 | LAPTM4A   |
| 4.33E-83  | 0.402003016 | 0.452 | 0.157 | 8.06E-79  | 5 | PPFIBP2   |
| 6.83E-83  | 0.323690928 | 0.923 | 0.646 | 1.27E-78  | 5 | MYL12B    |
| 1.11E-82  | 0.293201816 | 0.791 | 0.503 | 2.08E-78  | 5 | PAIP2     |
| 9.15E-82  | 0.335637556 | 0.834 | 0.515 | 1.71E-77  | 5 | HNRNPF    |
| 1.05E-81  | 0.412226183 | 0.989 | 0.856 | 1.95E-77  | 5 | UCP2      |
| 1.33E-81  | 0.366636252 | 0.798 | 0.5   | 2.48E-77  | 5 | EIF3A     |
| 6.92E-81  | 0.303638485 | 0.446 | 0.153 | 1.29E-76  | 5 | GPR132    |
| 1.60E-79  | 0.384656022 | 0.734 | 0.419 | 2.97E-75  | 5 | R3HDM4    |
| 3.58E-79  | 0.338742547 | 0.651 | 0.338 | 6.67E-75  | 5 | TRABD     |
| 4.99E-79  | 0.365100301 | 0.477 | 0.193 | 9.31E-75  | 5 | ST14      |
| 5.03E-79  | 0.542540054 | 0.919 | 0.713 | 9.37E-75  | 5 | SAT1      |
| 3.15E-78  | 0.294008387 | 0.519 | 0.226 | 5.86E-74  | 5 | CRLF3     |
| 2.64E-77  | 0.339783422 | 0.493 | 0.204 | 4.92E-73  | 5 | SLC16A3   |
| 6.39E-77  | 0.33817377  | 0.865 | 0.558 | 1.19E-72  | 5 | UBE2B     |
| 7.88E-77  | 0.562506585 | 0.539 | 0.244 | 1.47E-72  | 5 | SESN3     |
| 1.05E-76  | 0.434069748 | 0.807 | 0.501 | 1.96E-72  | 5 | CRIP1     |
| 2.04E-76  | 0.420042839 | 0.673 | 0.371 | 3.80E-72  | 5 | RIPOR1    |
| 2.32E-76  | 0.495304119 | 0.803 | 0.515 | 4.33E-72  | 5 | GGA2      |
| 3.13E-76  | 0.257310719 | 0.626 | 0.339 | 5.84E-72  | 5 | CKAP4     |
| 2.24E-74  | 0.382866254 | 0.71  | 0.382 | 4.18E-70  | 5 | COL9A3    |
| 1.11E-73  | 0.718743676 | 0.572 | 0.318 | 2.08E-69  | 5 | S100A11   |
| 1.82E-73  | 0.355124924 | 0.829 | 0.485 | 3.39E-69  | 5 | RGCC      |

|          |             |       |       |          |   |           |
|----------|-------------|-------|-------|----------|---|-----------|
| 3.56E-73 | 0.354258022 | 0.405 | 0.123 | 6.63E-69 | 5 | SAMSN1    |
| 4.22E-73 | 0.404280804 | 0.673 | 0.365 | 7.87E-69 | 5 | CD5       |
| 1.01E-72 | 0.322651832 | 0.784 | 0.472 | 1.87E-68 | 5 | PRKAR1A   |
| 3.56E-72 | 0.397457965 | 0.977 | 0.81  | 6.63E-68 | 5 | RHOA      |
| 5.61E-72 | 0.407302245 | 0.44  | 0.157 | 1.05E-67 | 5 | ARID3A    |
| 2.28E-71 | 0.393360762 | 0.668 | 0.403 | 4.25E-67 | 5 | TGFB1     |
| 1.66E-69 | 0.262217365 | 0.551 | 0.29  | 3.10E-65 | 5 | MAD1L1    |
| 2.72E-69 | 0.273073581 | 0.567 | 0.27  | 5.06E-65 | 5 | SIPA1L1   |
| 4.54E-69 | 0.389818826 | 0.925 | 0.723 | 8.47E-65 | 5 | ZFP36L2   |
| 2.54E-68 | 0.329377639 | 0.802 | 0.49  | 4.73E-64 | 5 | MAPK1IP1L |
| 3.68E-68 | 0.330166327 | 0.481 | 0.208 | 6.87E-64 | 5 | PRNP      |
| 3.78E-67 | 0.293802286 | 0.874 | 0.6   | 7.05E-63 | 5 | SRSF2     |
| 2.24E-66 | 0.266222951 | 0.388 | 0.139 | 4.17E-62 | 5 | SLCO4A1   |
| 4.76E-66 | 0.252686763 | 0.659 | 0.376 | 8.87E-62 | 5 | PAFAH1B1  |
| 1.01E-65 | 0.320195602 | 0.687 | 0.385 | 1.88E-61 | 5 | ANKRD11   |
| 1.23E-65 | 0.301988594 | 0.995 | 0.89  | 2.29E-61 | 5 | RPS20     |
| 1.57E-65 | 0.310624778 | 0.643 | 0.359 | 2.92E-61 | 5 | RHOG      |
| 1.89E-65 | 0.293107502 | 0.94  | 0.708 | 3.53E-61 | 5 | SLC25A3   |
| 2.03E-65 | 0.273603882 | 0.342 | 0.118 | 3.79E-61 | 5 | INSIG2    |
| 7.55E-65 | 0.377349385 | 0.297 | 0.086 | 1.41E-60 | 5 | LGALS3    |
| 3.21E-64 | 0.270404523 | 0.563 | 0.276 | 5.99E-60 | 5 | GNA13     |
| 5.62E-64 | 0.315070297 | 0.447 | 0.19  | 1.05E-59 | 5 | PRKAR2A   |
| 3.07E-63 | 0.368271595 | 0.574 | 0.304 | 5.72E-59 | 5 | YWHAH     |
| 4.43E-63 | 0.316551342 | 0.97  | 0.791 | 8.26E-59 | 5 | SARAF     |
| 1.39E-62 | 0.43265552  | 0.45  | 0.192 | 2.60E-58 | 5 | SH3TC1    |
| 1.50E-62 | 0.266346853 | 0.637 | 0.346 | 2.80E-58 | 5 | DNAJA2    |
| 1.84E-62 | 0.287599438 | 0.733 | 0.42  | 3.42E-58 | 5 | ADGRE5    |
| 3.53E-62 | 0.311902895 | 0.563 | 0.289 | 6.58E-58 | 5 | RAB31     |
| 3.91E-62 | 0.326673454 | 0.637 | 0.327 | 7.28E-58 | 5 | TMX4      |
| 2.39E-61 | 0.274079511 | 0.878 | 0.614 | 4.46E-57 | 5 | ATP5F1B   |
| 2.94E-61 | 0.256792547 | 0.63  | 0.342 | 5.48E-57 | 5 | SBNO1     |
| 7.00E-61 | 0.642820877 | 0.971 | 0.846 | 1.31E-56 | 5 | ACTG1     |
| 1.90E-60 | 0.294298695 | 0.454 | 0.197 | 3.54E-56 | 5 | NDRG1     |
| 1.93E-60 | 0.370973205 | 0.393 | 0.142 | 3.59E-56 | 5 | DUSP4     |
| 2.45E-60 | 0.254291029 | 0.568 | 0.276 | 4.57E-56 | 5 | BHLHE40   |
| 2.80E-60 | 0.271153978 | 0.782 | 0.481 | 5.21E-56 | 5 | RAP1B     |
| 9.74E-60 | 0.431426042 | 0.705 | 0.449 | 1.82E-55 | 5 | IL16      |
| 1.23E-59 | 0.309415987 | 0.832 | 0.545 | 2.30E-55 | 5 | DDX21     |
| 1.42E-59 | 0.278525864 | 0.485 | 0.231 | 2.64E-55 | 5 | TMBIM1    |
| 4.67E-59 | 0.267235855 | 0.648 | 0.357 | 8.71E-55 | 5 | SEC14L1   |
| 8.24E-58 | 0.301566678 | 0.611 | 0.349 | 1.54E-53 | 5 | TMEM154   |
| 1.13E-57 | 0.277872767 | 0.662 | 0.348 | 2.10E-53 | 5 | NFE2L2    |
| 2.38E-57 | 0.31324401  | 0.776 | 0.51  | 4.43E-53 | 5 | PDLIM1    |
| 4.87E-57 | 0.284303012 | 0.684 | 0.411 | 9.08E-53 | 5 | LY9       |
| 7.55E-57 | 0.298710883 | 0.484 | 0.219 | 1.41E-52 | 5 | SGTA      |
| 9.44E-57 | 0.279504719 | 0.756 | 0.462 | 1.76E-52 | 5 | EMD       |

|           |             |       |       |           |   |          |
|-----------|-------------|-------|-------|-----------|---|----------|
| 4.23E-56  | 0.271303889 | 0.995 | 0.877 | 7.88E-52  | 5 | COX4I1   |
| 4.34E-56  | 0.342013317 | 0.536 | 0.285 | 8.08E-52  | 5 | RHOF     |
| 4.91E-56  | 0.286030921 | 0.634 | 0.353 | 9.16E-52  | 5 | KDM4B    |
| 1.14E-55  | 0.400494608 | 0.538 | 0.281 | 2.12E-51  | 5 | HMOX1    |
| 1.79E-54  | 0.264572116 | 0.602 | 0.345 | 3.34E-50  | 5 | SPIB     |
| 2.38E-53  | 0.292359119 | 0.565 | 0.295 | 4.44E-49  | 5 | MAP2K3   |
| 3.39E-52  | 0.265565773 | 0.643 | 0.368 | 6.32E-48  | 5 | YWHAE    |
| 5.25E-52  | 0.2588815   | 0.358 | 0.139 | 9.79E-48  | 5 | TES      |
| 9.14E-52  | 0.278159796 | 0.731 | 0.458 | 1.70E-47  | 5 | RNF41    |
| 3.70E-51  | 0.258330211 | 0.354 | 0.148 | 6.90E-47  | 5 | SEMA7A   |
| 2.78E-50  | 0.499738722 | 0.742 | 0.509 | 5.17E-46  | 5 | S100A10  |
| 3.48E-50  | 0.259695997 | 0.825 | 0.55  | 6.48E-46  | 5 | DYNLL1   |
| 9.14E-50  | 0.338258352 | 0.596 | 0.348 | 1.70E-45  | 5 | IGFBP4   |
| 3.69E-49  | 0.291704045 | 0.782 | 0.515 | 6.87E-45  | 5 | CIB1     |
| 1.57E-46  | 0.25349397  | 0.695 | 0.421 | 2.93E-42  | 5 | GNB2     |
| 2.44E-45  | 0.271613423 | 0.552 | 0.339 | 4.55E-41  | 5 | PLEC     |
| 3.52E-44  | 0.25304066  | 0.478 | 0.243 | 6.57E-40  | 5 | BACE2    |
| 1.02E-43  | 0.276163812 | 0.642 | 0.39  | 1.90E-39  | 5 | PBXIP1   |
| 1.45E-41  | 0.272748509 | 0.394 | 0.168 | 2.70E-37  | 5 | S1PR1    |
| 3.73E-41  | 0.300113527 | 0.582 | 0.364 | 6.95E-37  | 5 | VASP     |
| 1.31E-35  | 0.360751832 | 0.498 | 0.297 | 2.44E-31  | 5 | ACP5     |
| 1.42E-20  | 0.298879501 | 0.297 | 0.182 | 2.64E-16  | 5 | SFTPFB   |
| 0         | 1.888920563 | 0.987 | 0.526 | 0         | 6 | FOS      |
| 0         | 1.715075873 | 0.848 | 0.27  | 0         | 6 | DNAJB1   |
| 0         | 1.635067878 | 0.837 | 0.186 | 0         | 6 | EGR1     |
| 0         | 1.62096201  | 0.989 | 0.655 | 0         | 6 | CD69     |
| 0         | 1.530949204 | 0.987 | 0.706 | 0         | 6 | DUSP1    |
| 0         | 1.46752898  | 0.996 | 0.662 | 0         | 6 | PPP1R15A |
| 0         | 1.420406355 | 0.992 | 0.836 | 0         | 6 | HSP90AA1 |
| 0         | 1.368760352 | 0.989 | 0.512 | 0         | 6 | FOSB     |
| 0         | 1.346080375 | 0.989 | 0.727 | 0         | 6 | JUN      |
| 0         | 1.336894912 | 0.996 | 0.844 | 0         | 6 | KLF6     |
| 0         | 1.12384313  | 0.852 | 0.323 | 0         | 6 | DDIT3    |
| 0         | 1.106547831 | 0.951 | 0.536 | 0         | 6 | DNAJA1   |
| 1.28E-293 | 1.273199563 | 0.894 | 0.363 | 2.38E-289 | 6 | NR4A1    |
| 5.76E-293 | 1.109852995 | 0.988 | 0.658 | 1.07E-288 | 6 | CD83     |
| 7.26E-264 | 1.150768614 | 0.997 | 0.836 | 1.35E-259 | 6 | ZFP36    |
| 4.98E-231 | 1.067330081 | 0.929 | 0.494 | 9.28E-227 | 6 | NR4A2    |
| 2.33E-220 | 0.85484112  | 0.888 | 0.52  | 4.34E-216 | 6 | RSRC2    |
| 1.33E-219 | 0.793348765 | 0.964 | 0.749 | 2.48E-215 | 6 | SRSF7    |
| 5.61E-218 | 0.824585939 | 0.935 | 0.634 | 1.04E-213 | 6 | TRA2B    |
| 2.57E-216 | 1.038751433 | 0.927 | 0.581 | 4.79E-212 | 6 | IER2     |
| 3.05E-214 | 0.939855197 | 0.964 | 0.773 | 5.69E-210 | 6 | HSPA8    |
| 6.54E-198 | 0.759088089 | 0.942 | 0.668 | 1.22E-193 | 6 | BRD2     |
| 8.59E-195 | 0.769618712 | 0.991 | 0.867 | 1.60E-190 | 6 | HSP90AB1 |
| 6.51E-190 | 0.669419144 | 0.945 | 0.64  | 1.21E-185 | 6 | CCNL1    |

|           |             |       |       |           |   |            |
|-----------|-------------|-------|-------|-----------|---|------------|
| 5.85E-186 | 1.022241957 | 0.941 | 0.654 | 1.09E-181 | 6 | NFKBIA     |
| 1.24E-181 | 0.686056246 | 0.949 | 0.704 | 2.31E-177 | 6 | EIF5       |
| 4.93E-180 | 0.666911957 | 0.796 | 0.39  | 9.19E-176 | 6 | GTF2B      |
| 2.18E-178 | 0.791721742 | 0.993 | 0.817 | 4.06E-174 | 6 | JUNB       |
| 5.91E-176 | 0.766317765 | 0.902 | 0.597 | 1.10E-171 | 6 | SRSF3      |
| 4.68E-171 | 0.775943916 | 0.807 | 0.383 | 8.72E-167 | 6 | CSRN1P     |
| 1.65E-166 | 0.977197069 | 0.656 | 0.248 | 3.07E-162 | 6 | NEU1       |
| 3.43E-164 | 0.647286247 | 0.709 | 0.283 | 6.40E-160 | 6 | SERTAD1    |
| 1.33E-163 | 0.70840701  | 0.973 | 0.716 | 2.48E-159 | 6 | YPEL5      |
| 2.21E-159 | 1.190787492 | 0.847 | 0.524 | 4.13E-155 | 6 | DUSP2      |
| 3.38E-152 | 0.647787781 | 0.419 | 0.074 | 6.30E-148 | 6 | EGR2       |
| 1.96E-151 | 0.848990892 | 0.92  | 0.598 | 3.66E-147 | 6 | TAGAP      |
| 1.33E-148 | 0.587597938 | 0.598 | 0.22  | 2.47E-144 | 6 | DEDD2      |
| 1.33E-146 | 0.621490178 | 0.876 | 0.529 | 2.49E-142 | 6 | NFKBID     |
| 2.62E-146 | 0.91858968  | 0.874 | 0.552 | 4.88E-142 | 6 | IRF1       |
| 2.02E-145 | 0.600106252 | 0.947 | 0.734 | 3.76E-141 | 6 | ZFAS1      |
| 1.44E-140 | 0.597818972 | 0.671 | 0.306 | 2.69E-136 | 6 | HSPH1      |
| 2.91E-140 | 1.723417858 | 0.547 | 0.186 | 5.42E-136 | 6 | HSPA1B     |
| 4.63E-132 | 0.906971877 | 0.74  | 0.394 | 8.64E-128 | 6 | KLF2       |
| 4.32E-131 | 0.527825561 | 0.834 | 0.488 | 8.06E-127 | 6 | SBDS       |
| 1.47E-130 | 0.721261113 | 0.517 | 0.189 | 2.75E-126 | 6 | GLA        |
| 5.30E-128 | 0.568114383 | 0.834 | 0.511 | 9.88E-124 | 6 | RPL22L1    |
| 2.73E-127 | 0.493145272 | 0.714 | 0.339 | 5.08E-123 | 6 | HBP1       |
| 2.20E-125 | 0.602129028 | 0.508 | 0.169 | 4.11E-121 | 6 | CKS2       |
| 2.98E-123 | 0.87294196  | 0.886 | 0.615 | 5.55E-119 | 6 | PMAIP1     |
| 3.06E-123 | 0.801316185 | 0.515 | 0.168 | 5.71E-119 | 6 | KLF4       |
| 1.81E-122 | 0.659156461 | 0.672 | 0.296 | 3.37E-118 | 6 | RASGEF1B   |
| 1.51E-121 | 0.431933749 | 0.781 | 0.414 | 2.81E-117 | 6 | CLK1       |
| 2.25E-120 | 0.581470764 | 0.932 | 0.717 | 4.19E-116 | 6 | EIF4A2     |
| 5.13E-120 | 0.872106377 | 0.648 | 0.285 | 9.56E-116 | 6 | NFKBIZ     |
| 1.42E-119 | 0.538713003 | 0.825 | 0.504 | 2.66E-115 | 6 | CYCS       |
| 8.16E-118 | 0.44642907  | 0.632 | 0.294 | 1.52E-113 | 6 | OSER1      |
| 1.71E-113 | 0.439080424 | 0.648 | 0.322 | 3.19E-109 | 6 | ZFAND5     |
| 1.94E-113 | 0.880089632 | 0.776 | 0.424 | 3.61E-109 | 6 | KLF10      |
| 3.10E-110 | 0.543115872 | 0.595 | 0.263 | 5.78E-106 | 6 | ARL4A      |
| 1.21E-108 | 0.474764856 | 0.44  | 0.118 | 2.25E-104 | 6 | DNAJB4     |
| 4.50E-108 | 0.622932325 | 0.876 | 0.59  | 8.39E-104 | 6 | PIM2       |
| 5.44E-108 | 0.52322314  | 0.842 | 0.534 | 1.01E-103 | 6 | PELI1      |
| 1.04E-106 | 0.62570869  | 0.489 | 0.17  | 1.94E-102 | 6 | DUSP10     |
| 1.38E-106 | 0.429714852 | 0.644 | 0.286 | 2.58E-102 | 6 | AC020916.1 |
| 3.28E-106 | 1.758321702 | 0.444 | 0.154 | 6.11E-102 | 6 | HSPA1A     |
| 1.21E-105 | 0.549546129 | 0.566 | 0.232 | 2.26E-101 | 6 | ZC3H12A    |
| 6.55E-103 | 0.49723097  | 0.979 | 0.873 | 1.22E-98  | 6 | TSC22D3    |
| 8.70E-103 | 0.823541189 | 0.764 | 0.428 | 1.62E-98  | 6 | RGS2       |
| 9.56E-103 | 0.444487089 | 0.466 | 0.157 | 1.78E-98  | 6 | UBE2S      |
| 2.85E-100 | 0.553458758 | 0.912 | 0.671 | 5.31E-96  | 6 | ATP6V0C    |

|          |             |       |       |          |   |          |
|----------|-------------|-------|-------|----------|---|----------|
| 2.73E-99 | 0.345542349 | 0.88  | 0.622 | 5.10E-95 | 6 | DDX3X    |
| 3.39E-99 | 0.468573642 | 0.902 | 0.641 | 6.31E-95 | 6 | TUBA1A   |
| 4.57E-99 | 0.354983648 | 0.486 | 0.17  | 8.52E-95 | 6 | ZBTB10   |
| 4.18E-98 | 0.434267132 | 0.6   | 0.273 | 7.80E-94 | 6 | TIPARP   |
| 3.04E-97 | 0.387308919 | 0.563 | 0.239 | 5.67E-93 | 6 | FAM53C   |
| 5.46E-95 | 0.427993634 | 0.565 | 0.243 | 1.02E-90 | 6 | DNAJB9   |
| 8.16E-95 | 0.377717407 | 0.838 | 0.578 | 1.52E-90 | 6 | ELF1     |
| 4.45E-94 | 0.491519636 | 0.954 | 0.76  | 8.30E-90 | 6 | UBB      |
| 1.50E-89 | 0.397529723 | 0.669 | 0.377 | 2.79E-85 | 6 | BUD31    |
| 1.26E-86 | 0.962771842 | 0.651 | 0.345 | 2.34E-82 | 6 | GADD45B  |
| 1.40E-85 | 0.739556903 | 0.383 | 0.13  | 2.60E-81 | 6 | TNF      |
| 4.72E-85 | 0.452921809 | 0.548 | 0.247 | 8.81E-81 | 6 | NR4A3    |
| 2.78E-84 | 0.901994014 | 0.383 | 0.127 | 5.19E-80 | 6 | MYADM    |
| 9.05E-84 | 0.359932627 | 0.963 | 0.812 | 1.69E-79 | 6 | PNRC1    |
| 1.01E-83 | 0.289570659 | 0.555 | 0.259 | 1.87E-79 | 6 | ZNF394   |
| 2.16E-83 | 0.5264364   | 0.633 | 0.336 | 4.03E-79 | 6 | SDCBP    |
| 1.20E-82 | 1.053683919 | 0.568 | 0.266 | 2.23E-78 | 6 | RGS1     |
| 1.73E-78 | 0.400013461 | 0.373 | 0.136 | 3.23E-74 | 6 | NFKBIE   |
| 1.59E-77 | 0.468259122 | 0.488 | 0.18  | 2.96E-73 | 6 | ZFAND2A  |
| 5.14E-77 | 0.477730352 | 0.723 | 0.462 | 9.58E-73 | 6 | RILPL2   |
| 3.98E-75 | 0.335375758 | 0.493 | 0.207 | 7.42E-71 | 6 | PPP1R15B |
| 4.27E-75 | 0.315956581 | 0.417 | 0.169 | 7.97E-71 | 6 | NRBF2    |
| 2.31E-74 | 0.359755937 | 0.295 | 0.068 | 4.31E-70 | 6 | BAG3     |
| 4.69E-74 | 0.378716453 | 0.818 | 0.542 | 8.74E-70 | 6 | SFPQ     |
| 3.95E-73 | 0.308649141 | 0.626 | 0.355 | 7.36E-69 | 6 | WTAP     |
| 6.99E-73 | 0.420256105 | 0.429 | 0.174 | 1.30E-68 | 6 | IER5     |
| 4.63E-72 | 0.344665741 | 0.559 | 0.286 | 8.62E-68 | 6 | NAMPT    |
| 6.88E-70 | 0.309321614 | 0.907 | 0.71  | 1.28E-65 | 6 | REL      |
| 1.37E-68 | 0.296912409 | 0.574 | 0.279 | 2.55E-64 | 6 | COQ10B   |
| 4.05E-68 | 0.312339274 | 0.469 | 0.21  | 7.55E-64 | 6 | SDE2     |
| 1.04E-67 | 0.455390214 | 0.969 | 0.826 | 1.94E-63 | 6 | BTG2     |
| 1.44E-67 | 0.262483818 | 0.378 | 0.145 | 2.68E-63 | 6 | SLC25A33 |
| 5.06E-67 | 0.268929748 | 0.576 | 0.297 | 9.44E-63 | 6 | CREBRF   |
| 1.10E-66 | 0.273472579 | 0.628 | 0.332 | 2.06E-62 | 6 | IFRD1    |
| 1.85E-66 | 0.360518659 | 0.673 | 0.408 | 3.45E-62 | 6 | AZIN1    |
| 2.26E-66 | 0.339721273 | 0.483 | 0.23  | 4.21E-62 | 6 | AHSA1    |
| 2.77E-64 | 0.343274202 | 0.726 | 0.479 | 5.17E-60 | 6 | SELENOK  |
| 1.12E-63 | 0.362441735 | 0.729 | 0.45  | 2.09E-59 | 6 | AMD1     |
| 1.63E-63 | 0.301507323 | 0.5   | 0.246 | 3.03E-59 | 6 | SNHG15   |
| 1.79E-63 | 0.381002871 | 0.771 | 0.508 | 3.34E-59 | 6 | SNHG8    |
| 6.01E-63 | 0.429418786 | 0.958 | 0.814 | 1.12E-58 | 6 | RHOH     |
| 1.41E-62 | 0.326945664 | 0.576 | 0.319 | 2.63E-58 | 6 | EIF4A3   |
| 1.44E-62 | 0.280084662 | 0.19  | 0.028 | 2.69E-58 | 6 | EGR3     |
| 2.38E-62 | 0.321593501 | 0.531 | 0.25  | 4.44E-58 | 6 | CWC25    |
| 3.70E-62 | 0.331279787 | 0.594 | 0.337 | 6.90E-58 | 6 | PHACTR1  |
| 8.09E-61 | 0.351055442 | 0.664 | 0.441 | 1.51E-56 | 6 | MTRNR2L8 |

|          |             |       |       |          |   |           |
|----------|-------------|-------|-------|----------|---|-----------|
| 1.04E-60 | 0.261939611 | 0.713 | 0.471 | 1.94E-56 | 6 | HNRNPH3   |
| 2.23E-60 | 0.267711929 | 0.352 | 0.127 | 4.16E-56 | 6 | ARL5B     |
| 7.46E-60 | 0.377934655 | 0.745 | 0.476 | 1.39E-55 | 6 | TUBB4B    |
| 7.71E-60 | 0.329034096 | 0.426 | 0.202 | 1.44E-55 | 6 | H2AFX     |
| 1.62E-58 | 0.284240421 | 0.838 | 0.605 | 3.02E-54 | 6 | SRSF2     |
| 3.81E-58 | 0.349707334 | 0.88  | 0.653 | 7.10E-54 | 6 | CCR7      |
| 4.59E-58 | 0.283134903 | 0.653 | 0.384 | 8.56E-54 | 6 | DDX39A    |
| 6.86E-58 | 0.458696102 | 0.711 | 0.46  | 1.28E-53 | 6 | HSPE1     |
| 1.60E-57 | 0.306009301 | 0.654 | 0.384 | 2.98E-53 | 6 | TANK      |
| 1.29E-56 | 0.280662042 | 0.424 | 0.189 | 2.40E-52 | 6 | ATG101    |
| 1.42E-56 | 0.253154607 | 0.809 | 0.581 | 2.65E-52 | 6 | RBM8A     |
| 1.86E-56 | 0.889073207 | 0.338 | 0.139 | 3.46E-52 | 6 | ATF3      |
| 3.55E-56 | 0.258863207 | 0.545 | 0.295 | 6.62E-52 | 6 | PPP2CA    |
| 7.14E-56 | 0.364341521 | 0.376 | 0.176 | 1.33E-51 | 6 | MRPL18    |
| 3.44E-55 | 0.342922669 | 0.682 | 0.426 | 6.41E-51 | 6 | ATF4      |
| 8.81E-55 | 0.278382748 | 0.586 | 0.343 | 1.64E-50 | 6 | BCAS2     |
| 1.80E-53 | 0.34319595  | 0.151 | 0.024 | 3.35E-49 | 6 | EGR4      |
| 2.19E-52 | 0.296274615 | 0.75  | 0.509 | 4.09E-48 | 6 | MAP1LC3B  |
| 1.54E-51 | 0.384265198 | 0.7   | 0.453 | 2.87E-47 | 6 | CXCR5     |
| 2.07E-51 | 0.383269706 | 0.46  | 0.227 | 3.86E-47 | 6 | PNP       |
| 3.23E-51 | 0.347576482 | 0.386 | 0.159 | 6.03E-47 | 6 | CITED2    |
| 7.15E-50 | 0.282696444 | 0.48  | 0.268 | 1.33E-45 | 6 | DDX3Y     |
| 1.09E-49 | 0.275799337 | 0.362 | 0.16  | 2.04E-45 | 6 | SERTAD3   |
| 5.54E-49 | 0.399385819 | 0.536 | 0.326 | 1.03E-44 | 6 | MIR155HG  |
| 6.11E-49 | 0.303726704 | 0.739 | 0.509 | 1.14E-44 | 6 | NOP58     |
| 6.42E-49 | 0.327945564 | 0.53  | 0.28  | 1.20E-44 | 6 | PER1      |
| 9.47E-49 | 0.288242941 | 0.788 | 0.551 | 1.77E-44 | 6 | G3BP2     |
| 1.45E-48 | 0.289441042 | 0.848 | 0.618 | 2.70E-44 | 6 | HERPUD1   |
| 8.19E-48 | 0.294062958 | 0.48  | 0.24  | 1.53E-43 | 6 | TNFAIP3   |
| 3.61E-47 | 0.314074446 | 0.792 | 0.538 | 6.72E-43 | 6 | RAB11FIP1 |
| 1.21E-46 | 0.374492015 | 0.652 | 0.41  | 2.26E-42 | 6 | ZNF331    |
| 1.48E-45 | 0.31133629  | 0.692 | 0.468 | 2.76E-41 | 6 | JUND      |
| 2.21E-45 | 0.255838591 | 0.661 | 0.426 | 4.12E-41 | 6 | HSPD1     |
| 2.95E-44 | 0.303847221 | 0.458 | 0.238 | 5.50E-40 | 6 | DNAAF2    |
| 3.40E-44 | 0.250388341 | 0.191 | 0.052 | 6.33E-40 | 6 | RND1      |
| 1.94E-43 | 0.345365248 | 0.293 | 0.114 | 3.61E-39 | 6 | FILIP1L   |
| 9.10E-42 | 0.280451709 | 0.289 | 0.111 | 1.70E-37 | 6 | ANKRD37   |
| 1.61E-41 | 0.559595025 | 0.403 | 0.221 | 3.01E-37 | 6 | CTLA4     |
| 3.27E-41 | 0.336216223 | 0.659 | 0.412 | 6.10E-37 | 6 | RHOB      |
| 1.35E-39 | 0.280827945 | 0.872 | 0.675 | 2.52E-35 | 6 | YBX3      |
| 2.90E-38 | 0.409662419 | 0.259 | 0.114 | 5.40E-34 | 6 | CLEC2B    |
| 4.59E-37 | 0.35418727  | 0.54  | 0.3   | 8.55E-33 | 6 | MAP3K8    |
| 1.75E-36 | 0.276093801 | 0.505 | 0.302 | 3.26E-32 | 6 | PLK3      |
| 2.37E-36 | 0.505699063 | 0.247 | 0.104 | 4.43E-32 | 6 | MYC       |
| 3.21E-36 | 0.285610533 | 0.601 | 0.419 | 5.99E-32 | 6 | LY9       |
| 2.69E-34 | 0.533902511 | 0.65  | 0.501 | 5.01E-30 | 6 | RGCC      |



|           |             |       |       |           |   |            |
|-----------|-------------|-------|-------|-----------|---|------------|
| 3.63E-31  | 0.268535087 | 0.364 | 0.194 | 6.76E-27  | 6 | GPR18      |
| 6.31E-28  | 0.565175845 | 0.602 | 0.417 | 1.18E-23  | 6 | PIM1       |
| 9.15E-28  | 0.27985505  | 0.251 | 0.109 | 1.71E-23  | 6 | ICAM1      |
| 1.61E-26  | 0.271182353 | 0.465 | 0.284 | 3.00E-22  | 6 | TOR3A      |
| 1.86E-13  | 0.26407233  | 0.492 | 0.344 | 3.46E-09  | 6 | HSPB1      |
| 1.17E-92  | 0.664606351 | 0.905 | 0.782 | 2.18E-88  | 7 | TXNIP      |
| 1.85E-78  | 1.047308646 | 0.496 | 0.234 | 3.45E-74  | 7 | AC007952.4 |
| 1.12E-58  | 0.88992381  | 0.395 | 0.205 | 2.08E-54  | 7 | AC063949.2 |
| 6.53E-49  | 0.617073141 | 0.516 | 0.391 | 1.22E-44  | 7 | TRAF3IP3   |
| 1.14E-36  | 0.699511551 | 0.593 | 0.484 | 2.13E-32  | 7 | IGLL5      |
| 9.11E-33  | 0.636002507 | 0.209 | 0.09  | 1.70E-28  | 7 | LCN8       |
| 2.37E-19  | 0.498386019 | 0.343 | 0.24  | 4.41E-15  | 7 | PCDH9      |
| 0         | 1.366568915 | 0.968 | 0.649 | 0         | 8 | CCR7       |
| 0         | 1.365694829 | 0.91  | 0.397 | 0         | 8 | ZNF331     |
| 0         | 1.206317295 | 0.978 | 0.494 | 0         | 8 | NR4A2      |
| 0         | 1.010423341 | 0.999 | 0.801 | 0         | 8 | CXCR4      |
| 1.95E-298 | 0.961508516 | 0.993 | 0.66  | 3.63E-294 | 8 | CD83       |
| 7.52E-289 | 1.049254407 | 0.997 | 0.818 | 1.40E-284 | 8 | JUNB       |
| 2.95E-288 | 0.983786728 | 0.987 | 0.717 | 5.50E-284 | 8 | YPEL5      |
| 1.39E-284 | 1.117799858 | 0.891 | 0.444 | 2.58E-280 | 8 | CXCR5      |
| 9.18E-265 | 0.782741426 | 0.983 | 0.515 | 1.71E-260 | 8 | FOSB       |
| 3.25E-256 | 0.918863138 | 0.959 | 0.655 | 6.06E-252 | 8 | NFKBIA     |
| 3.63E-245 | 0.903885465 | 0.763 | 0.268 | 6.78E-241 | 8 | PER1       |
| 1.48E-230 | 0.998976342 | 0.874 | 0.421 | 2.75E-226 | 8 | KLF10      |
| 1.50E-228 | 0.925448267 | 0.897 | 0.423 | 2.80E-224 | 8 | RGS2       |
| 1.29E-222 | 0.862051321 | 0.882 | 0.431 | 2.41E-218 | 8 | CDKN1A     |
| 9.21E-218 | 0.983068343 | 0.936 | 0.614 | 1.72E-213 | 8 | HERPUD1    |
| 9.64E-216 | 1.325185665 | 0.729 | 0.292 | 1.80E-211 | 8 | CHMP1B     |
| 3.49E-206 | 0.699605132 | 0.932 | 0.551 | 6.51E-202 | 8 | IRF1       |
| 1.62E-204 | 0.975097875 | 0.911 | 0.61  | 3.02E-200 | 8 | HSP90B1    |
| 3.71E-201 | 0.681706944 | 0.974 | 0.668 | 6.92E-197 | 8 | CD55       |
| 9.65E-201 | 0.814170649 | 0.931 | 0.589 | 1.80E-196 | 8 | PIM2       |
| 3.22E-196 | 0.724864348 | 0.854 | 0.473 | 6.00E-192 | 8 | SELENOK    |
| 8.50E-191 | 0.867840096 | 0.755 | 0.355 | 1.58E-186 | 8 | TRAF4      |
| 1.77E-189 | 0.756353904 | 0.948 | 0.598 | 3.30E-185 | 8 | TAGAP      |
| 7.52E-185 | 0.778558395 | 0.859 | 0.486 | 1.40E-180 | 8 | BIRC3      |
| 2.50E-180 | 0.752170544 | 0.738 | 0.347 | 4.67E-176 | 8 | NUAK2      |
| 2.03E-178 | 0.849089534 | 0.729 | 0.238 | 3.78E-174 | 8 | NR4A3      |
| 2.22E-175 | 0.875338719 | 0.785 | 0.373 | 4.14E-171 | 8 | PIM3       |
| 1.10E-174 | 0.835532816 | 0.721 | 0.291 | 2.05E-170 | 8 | MAP3K8     |
| 9.90E-167 | 0.367576581 | 0.774 | 0.34  | 1.85E-162 | 8 | GADD45B    |
| 1.72E-166 | 0.654638788 | 0.941 | 0.71  | 3.20E-162 | 8 | REL        |
| 7.23E-162 | 0.710232171 | 0.642 | 0.232 | 1.35E-157 | 8 | TNFAIP3    |
| 2.46E-158 | 0.832030254 | 0.805 | 0.408 | 4.58E-154 | 8 | LY9        |
| 2.63E-157 | 0.736441786 | 0.614 | 0.212 | 4.90E-153 | 8 | VPREB3     |
| 1.38E-147 | 0.702343232 | 0.8   | 0.375 | 2.57E-143 | 8 | TENT5C     |

|           |             |       |       |           |   |           |
|-----------|-------------|-------|-------|-----------|---|-----------|
| 2.67E-146 | 0.816412664 | 0.526 | 0.141 | 4.98E-142 | 8 | BCL2A1    |
| 9.53E-146 | 0.735293325 | 0.652 | 0.247 | 1.78E-141 | 8 | SLC2A3    |
| 2.41E-144 | 0.740114751 | 0.487 | 0.096 | 4.49E-140 | 8 | ICAM1     |
| 5.43E-144 | 0.685667939 | 0.741 | 0.366 | 1.01E-139 | 8 | TGIF1     |
| 2.80E-137 | 0.791928377 | 0.829 | 0.574 | 5.22E-133 | 8 | ITM2B     |
| 2.29E-136 | 0.481464683 | 0.689 | 0.297 | 4.27E-132 | 8 | RASGEF1B  |
| 1.39E-130 | 0.531875791 | 0.872 | 0.535 | 2.59E-126 | 8 | RAB11FIP1 |
| 4.83E-129 | 0.602665695 | 0.696 | 0.369 | 9.00E-125 | 8 | FAM177A1  |
| 4.46E-128 | 0.582724396 | 0.825 | 0.517 | 8.31E-124 | 8 | ADTRP     |
| 7.65E-125 | 0.554037947 | 0.534 | 0.185 | 1.43E-120 | 8 | SC5D      |
| 1.85E-124 | 0.570961335 | 0.638 | 0.273 | 3.44E-120 | 8 | TIPARP    |
| 3.10E-122 | 0.569143097 | 0.692 | 0.334 | 5.78E-118 | 8 | NFKB2     |
| 5.71E-122 | 0.59540443  | 0.735 | 0.342 | 1.06E-117 | 8 | KDM6B     |
| 1.00E-121 | 0.421666298 | 0.859 | 0.532 | 1.87E-117 | 8 | NFKBID    |
| 6.56E-121 | 0.447507506 | 0.991 | 0.826 | 1.22E-116 | 8 | BTG2      |
| 2.35E-116 | 0.502228026 | 0.738 | 0.39  | 4.38E-112 | 8 | CSRNP1    |
| 4.67E-113 | 0.509272214 | 0.599 | 0.259 | 8.71E-109 | 8 | USP36     |
| 7.78E-111 | 0.517061758 | 0.696 | 0.351 | 1.45E-106 | 8 | NFE2L2    |
| 3.66E-110 | 0.492744316 | 0.982 | 0.813 | 6.81E-106 | 8 | RHOH      |
| 3.81E-110 | 0.417980207 | 0.565 | 0.246 | 7.11E-106 | 8 | MBNL2     |
| 1.64E-104 | 0.472192169 | 0.925 | 0.622 | 3.05E-100 | 8 | PDE4B     |
| 2.51E-104 | 0.510921109 | 0.571 | 0.249 | 4.67E-100 | 8 | NXT1      |
| 1.58E-103 | 0.483527425 | 0.409 | 0.105 | 2.95E-99  | 8 | ANKRD37   |
| 1.64E-100 | 0.429636833 | 0.653 | 0.293 | 3.05E-96  | 8 | CREM      |
| 3.38E-96  | 0.660138843 | 0.5   | 0.18  | 6.29E-92  | 8 | DDIT4     |
| 6.84E-96  | 0.445172843 | 0.645 | 0.33  | 1.27E-91  | 8 | ISCA1     |
| 4.39E-95  | 0.563574937 | 0.512 | 0.188 | 8.17E-91  | 8 | TWISTNB   |
| 4.61E-95  | 0.464071703 | 0.8   | 0.508 | 8.59E-91  | 8 | CYCS      |
| 8.06E-94  | 0.496403422 | 0.601 | 0.304 | 1.50E-89  | 8 | IRF2BP2   |
| 5.29E-92  | 0.579149022 | 0.361 | 0.099 | 9.86E-88  | 8 | GEM       |
| 6.18E-92  | 0.615922437 | 0.724 | 0.411 | 1.15E-87  | 8 | PIM1      |
| 3.29E-91  | 0.466967957 | 0.642 | 0.344 | 6.13E-87  | 8 | MOB3A     |
| 4.87E-91  | 0.463804086 | 0.58  | 0.267 | 9.07E-87  | 8 | ARL4A     |
| 7.67E-90  | 0.328828479 | 0.964 | 0.794 | 1.43E-85  | 8 | SARAF     |
| 1.45E-89  | 0.461786208 | 0.323 | 0.068 | 2.71E-85  | 8 | GRASP     |
| 4.61E-89  | 0.450952957 | 0.515 | 0.222 | 8.59E-85  | 8 | MANBA     |
| 1.32E-87  | 0.475985171 | 0.623 | 0.322 | 2.46E-83  | 8 | ALG13     |
| 2.08E-87  | 0.442185883 | 0.527 | 0.231 | 3.87E-83  | 8 | BCL2L11   |
| 6.64E-87  | 0.307277855 | 0.816 | 0.528 | 1.24E-82  | 8 | IDS       |
| 9.65E-86  | 0.430755856 | 0.841 | 0.579 | 1.80E-81  | 8 | ELF1      |
| 1.29E-85  | 0.497613692 | 0.481 | 0.188 | 2.40E-81  | 8 | IL2RA     |
| 5.31E-85  | 0.352482795 | 0.444 | 0.166 | 9.90E-81  | 8 | ELL2      |
| 5.21E-84  | 0.363900833 | 0.713 | 0.397 | 9.72E-80  | 8 | GTF2B     |
| 1.85E-83  | 0.336122621 | 0.529 | 0.225 | 3.45E-79  | 8 | ZNF10     |
| 3.72E-82  | 0.387364865 | 0.818 | 0.569 | 6.93E-78  | 8 | SNX2      |
| 4.63E-81  | 0.56447753  | 0.874 | 0.667 | 8.63E-77  | 8 | GSTP1     |

|          |             |       |       |          |   |           |
|----------|-------------|-------|-------|----------|---|-----------|
| 9.89E-81 | 0.419981167 | 0.598 | 0.305 | 1.84E-76 | 8 | RRBP1     |
| 1.03E-79 | 0.32235815  | 0.478 | 0.21  | 1.92E-75 | 8 | PPP1R15B  |
| 1.92E-79 | 0.312701655 | 0.958 | 0.78  | 3.58E-75 | 8 | PPDPF     |
| 1.70E-78 | 0.360318234 | 0.613 | 0.328 | 3.16E-74 | 8 | FYTDD1    |
| 6.88E-78 | 0.473120853 | 0.321 | 0.086 | 1.28E-73 | 8 | ID1       |
| 2.85E-77 | 0.384074293 | 0.503 | 0.217 | 5.32E-73 | 8 | NUP58     |
| 4.26E-77 | 0.310736256 | 0.558 | 0.265 | 7.93E-73 | 8 | DDX3Y     |
| 3.85E-76 | 0.456730046 | 0.362 | 0.114 | 7.17E-72 | 8 | ENC1      |
| 7.81E-75 | 0.475830416 | 0.707 | 0.454 | 1.46E-70 | 8 | IL16      |
| 3.29E-74 | 0.454276315 | 0.757 | 0.47  | 6.13E-70 | 8 | TUBA4A    |
| 1.39E-73 | 0.361558099 | 0.249 | 0.056 | 2.59E-69 | 8 | MYBL2     |
| 2.77E-72 | 0.431119207 | 0.563 | 0.281 | 5.17E-68 | 8 | BHLHE40   |
| 1.07E-71 | 0.367593127 | 0.678 | 0.427 | 1.99E-67 | 8 | LAPTM4A   |
| 1.19E-71 | 0.253902528 | 0.518 | 0.24  | 2.22E-67 | 8 | LYST      |
| 3.98E-71 | 0.386381619 | 0.732 | 0.458 | 7.41E-67 | 8 | ITGB1     |
| 3.70E-70 | 0.404373494 | 0.726 | 0.464 | 6.90E-66 | 8 | RILPL2    |
| 2.52E-69 | 0.363433099 | 0.418 | 0.167 | 4.69E-65 | 8 | NEK1      |
| 9.98E-69 | 0.253138923 | 0.472 | 0.206 | 1.86E-64 | 8 | ABCG1     |
| 4.45E-68 | 0.342631554 | 0.28  | 0.063 | 8.29E-64 | 8 | VPS37B    |
| 4.65E-68 | 0.405308863 | 0.83  | 0.578 | 8.67E-64 | 8 | CYTIP     |
| 2.10E-67 | 0.351836771 | 0.431 | 0.17  | 3.91E-63 | 8 | S1PR1     |
| 3.69E-67 | 0.315129932 | 0.544 | 0.289 | 6.88E-63 | 8 | NAMPT     |
| 1.47E-66 | 0.330614019 | 0.571 | 0.314 | 2.74E-62 | 8 | RNF138    |
| 1.99E-66 | 0.393460275 | 0.983 | 0.874 | 3.71E-62 | 8 | TSC22D3   |
| 6.00E-66 | 0.32186571  | 0.629 | 0.397 | 1.12E-61 | 8 | SPINT2    |
| 3.30E-65 | 0.401840759 | 0.481 | 0.23  | 6.15E-61 | 8 | MIDN      |
| 1.24E-64 | 0.316075001 | 0.685 | 0.429 | 2.31E-60 | 8 | BACH1     |
| 2.21E-64 | 0.322735299 | 0.843 | 0.626 | 4.11E-60 | 8 | RUBCNL    |
| 7.37E-63 | 0.363794278 | 0.723 | 0.473 | 1.37E-58 | 8 | STK17B    |
| 1.13E-62 | 0.359892473 | 0.638 | 0.366 | 2.11E-58 | 8 | P2RY10    |
| 1.80E-62 | 0.388737573 | 0.429 | 0.176 | 3.36E-58 | 8 | DUSP10    |
| 7.63E-62 | 0.327560777 | 0.402 | 0.188 | 1.42E-57 | 8 | DYNLT1    |
| 9.50E-62 | 0.344361569 | 0.904 | 0.733 | 1.77E-57 | 8 | PRRC2C    |
| 1.86E-61 | 0.34626776  | 0.614 | 0.343 | 3.46E-57 | 8 | BCAS2     |
| 4.31E-61 | 0.348254842 | 0.752 | 0.503 | 8.04E-57 | 8 | PTPN1     |
| 5.74E-61 | 0.319257944 | 0.691 | 0.429 | 1.07E-56 | 8 | IDI1      |
| 1.86E-60 | 0.323559673 | 0.979 | 0.877 | 3.46E-56 | 8 | HLA-DQA1  |
| 1.65E-59 | 0.2624682   | 0.302 | 0.108 | 3.07E-55 | 8 | EEF2K     |
| 2.85E-59 | 0.331614797 | 0.939 | 0.762 | 5.31E-55 | 8 | UBB       |
| 5.86E-59 | 0.331018752 | 0.382 | 0.16  | 1.09E-54 | 8 | SNN       |
| 1.88E-58 | 0.336602705 | 0.755 | 0.498 | 3.50E-54 | 8 | MAPK1IP1L |
| 3.24E-58 | 0.284363267 | 0.609 | 0.335 | 6.04E-54 | 8 | IFRD1     |
| 3.87E-58 | 0.269570446 | 0.761 | 0.525 | 7.22E-54 | 8 | NR3C1     |
| 7.13E-58 | 0.276846683 | 0.503 | 0.27  | 1.33E-53 | 8 | ZFAND6    |
| 1.02E-57 | 0.320248594 | 0.632 | 0.384 | 1.90E-53 | 8 | CDKN1B    |
| 5.08E-57 | 0.376322628 | 0.876 | 0.659 | 9.46E-53 | 8 | CALR      |

|          |             |       |       |          |   |          |
|----------|-------------|-------|-------|----------|---|----------|
| 6.83E-57 | 0.314459361 | 0.368 | 0.161 | 1.27E-52 | 8 | PRR7     |
| 8.16E-57 | 0.365335262 | 0.575 | 0.33  | 1.52E-52 | 8 | SERPINB9 |
| 8.18E-56 | 0.326812876 | 0.284 | 0.092 | 1.53E-51 | 8 | CD9      |
| 1.55E-55 | 0.317327647 | 0.594 | 0.35  | 2.89E-51 | 8 | CMTM6    |
| 1.39E-54 | 0.281267623 | 0.625 | 0.37  | 2.59E-50 | 8 | CHD1     |
| 2.09E-54 | 0.356851642 | 0.899 | 0.673 | 3.89E-50 | 8 | ATP6V0C  |
| 4.05E-54 | 0.266820984 | 0.547 | 0.293 | 7.54E-50 | 8 | RARA     |
| 4.74E-54 | 0.357820218 | 0.642 | 0.395 | 8.84E-50 | 8 | PBXIP1   |
| 7.82E-54 | 0.304206519 | 0.525 | 0.287 | 1.46E-49 | 8 | ARL4C    |
| 2.58E-53 | 0.278852468 | 0.436 | 0.197 | 4.81E-49 | 8 | BANK1    |
| 2.28E-52 | 0.308700046 | 0.794 | 0.538 | 4.25E-48 | 8 | HSPA5    |
| 3.89E-52 | 0.332769799 | 0.37  | 0.15  | 7.25E-48 | 8 | CFAP20   |
| 3.42E-51 | 0.336003043 | 0.298 | 0.102 | 6.37E-47 | 8 | BCL9L    |
| 6.45E-51 | 0.269648386 | 0.746 | 0.496 | 1.20E-46 | 8 | SBDS     |
| 3.73E-50 | 0.268585258 | 0.63  | 0.385 | 6.96E-46 | 8 | RNMT     |
| 8.80E-50 | 0.287645711 | 0.77  | 0.554 | 1.64E-45 | 8 | G3BP2    |
| 1.67E-49 | 0.312359419 | 0.276 | 0.096 | 3.12E-45 | 8 | PLIN2    |
| 1.72E-49 | 0.314061401 | 0.56  | 0.301 | 3.21E-45 | 8 | OSER1    |
| 1.88E-49 | 0.280451535 | 0.61  | 0.38  | 3.50E-45 | 8 | WBP11    |
| 4.35E-49 | 0.274058131 | 0.764 | 0.517 | 8.10E-45 | 8 | RELB     |
| 1.08E-47 | 0.367847011 | 0.375 | 0.152 | 2.01E-43 | 8 | PPIF     |
| 1.25E-47 | 0.27606085  | 0.311 | 0.116 | 2.32E-43 | 8 | IFIH1    |
| 2.78E-47 | 0.250751448 | 0.638 | 0.408 | 5.18E-43 | 8 | DENND4A  |
| 1.61E-46 | 0.260421667 | 0.985 | 0.88  | 3.00E-42 | 8 | COX4I1   |
| 2.78E-46 | 0.308747979 | 0.463 | 0.256 | 5.18E-42 | 8 | MX1      |
| 3.33E-45 | 0.282666843 | 0.522 | 0.283 | 6.20E-41 | 8 | ARID5A   |
| 2.06E-44 | 0.256933478 | 0.542 | 0.323 | 3.84E-40 | 8 | EIF4A3   |
| 1.55E-43 | 0.26927503  | 0.61  | 0.401 | 2.90E-39 | 8 | SF3A1    |
| 4.60E-43 | 0.250885789 | 0.665 | 0.456 | 8.58E-39 | 8 | AMD1     |
| 1.19E-42 | 0.285369967 | 0.344 | 0.135 | 2.21E-38 | 8 | ALG2     |
| 3.28E-42 | 0.272252608 | 0.772 | 0.554 | 6.11E-38 | 8 | DDX21    |
| 1.65E-41 | 0.40895314  | 0.723 | 0.498 | 3.07E-37 | 8 | RGCC     |
| 1.68E-41 | 0.260255904 | 0.359 | 0.175 | 3.14E-37 | 8 | TUBB2A   |
| 5.19E-40 | 0.261967889 | 0.403 | 0.201 | 9.67E-36 | 8 | MOB4     |
| 9.81E-40 | 0.251877605 | 0.87  | 0.684 | 1.83E-35 | 8 | HNRNPA0  |
| 1.04E-39 | 0.258058672 | 0.967 | 0.836 | 1.94E-35 | 8 | CALM1    |
| 1.40E-39 | 0.304250612 | 0.842 | 0.662 | 2.60E-35 | 8 | CTSS     |
| 2.08E-39 | 0.269527663 | 0.51  | 0.294 | 3.87E-35 | 8 | APLP2    |
| 4.93E-38 | 0.270011554 | 0.507 | 0.322 | 9.18E-34 | 8 | ELMSAN1  |
| 1.09E-37 | 0.278871042 | 0.3   | 0.116 | 2.03E-33 | 8 | PRMT9    |
| 1.34E-37 | 0.309481222 | 0.215 | 0.07  | 2.49E-33 | 8 | FAM111B  |
| 1.77E-37 | 0.256418504 | 0.513 | 0.31  | 3.30E-33 | 8 | MKMK2    |
| 2.57E-35 | 0.463285673 | 0.278 | 0.114 | 4.78E-31 | 8 | CLEC2B   |
| 8.09E-35 | 0.257704525 | 0.868 | 0.687 | 1.51E-30 | 8 | LITAF    |
| 1.46E-30 | 0.272390758 | 0.368 | 0.195 | 2.72E-26 | 8 | GPR18    |
| 4.69E-27 | 0.265646585 | 0.344 | 0.194 | 8.75E-23 | 8 | CXorf21  |

|          |             |       |       |          |   |          |
|----------|-------------|-------|-------|----------|---|----------|
| 1.37E-26 | 0.275552168 | 0.502 | 0.34  | 2.55E-22 | 8 | HIST1H1C |
| 2.49E-20 | 0.44661103  | 0.645 | 0.483 | 4.63E-16 | 8 | SELL     |
| 1.78E-86 | 1.436489298 | 0.656 | 0.545 | 3.31E-82 | 9 | NFKBID   |
| 1.27E-81 | 0.600498681 | 0.761 | 0.546 | 2.37E-77 | 9 | FOS      |
| 2.80E-77 | 0.735715668 | 0.801 | 0.673 | 5.21E-73 | 9 | CD83     |
| 2.96E-67 | 0.867377976 | 0.721 | 0.533 | 5.51E-63 | 9 | FOSB     |
| 1.39E-60 | 0.55487874  | 0.78  | 0.67  | 2.60E-56 | 9 | CD69     |
| 4.53E-48 | 1.463595307 | 0.561 | 0.45  | 8.44E-44 | 9 | MTRNR2L8 |
| 9.84E-47 | 1.803337953 | 0.449 | 0.323 | 1.83E-42 | 9 | HSPH1    |
| 5.80E-46 | 0.820565515 | 0.662 | 0.515 | 1.08E-41 | 9 | NR4A2    |
| 4.94E-42 | 0.328769473 | 0.126 | 0.363 | 9.21E-38 | 9 | HSPB1    |
| 1.79E-35 | 1.14301331  | 0.356 | 0.237 | 3.33E-31 | 9 | ZNF10    |
| 8.43E-29 | 1.710793851 | 0.327 | 0.203 | 1.57E-24 | 9 | HSPA1B   |
| 2.86E-22 | 0.253427645 | 0.167 | 0.328 | 5.33E-18 | 9 | BUD23    |
| 3.04E-22 | 0.250705969 | 0.268 | 0.497 | 5.67E-18 | 9 | PPIG     |
| 9.64E-22 | 0.260920137 | 0.199 | 0.359 | 1.80E-17 | 9 | ZNF24    |
| 6.44E-20 | 0.259023603 | 0.291 | 0.521 | 1.20E-15 | 9 | HNRNPR   |
| 1.56E-19 | 0.789747647 | 0.222 | 0.12  | 2.90E-15 | 9 | ZBED6    |
| 1.91E-19 | 0.28137923  | 0.193 | 0.366 | 3.56E-15 | 9 | PPM1G    |
| 5.79E-19 | 0.886659674 | 0.344 | 0.221 | 1.08E-14 | 9 | EGR1     |
| 3.48E-18 | 0.278792056 | 0.236 | 0.443 | 6.49E-14 | 9 | CCDC12   |
| 3.68E-18 | 0.643569313 | 0.736 | 0.843 | 6.86E-14 | 9 | TCF4     |
| 2.28E-17 | 0.274824856 | 0.191 | 0.35  | 4.25E-13 | 9 | FXR1     |
| 2.43E-17 | 0.585694811 | 0.745 | 0.873 | 4.53E-13 | 9 | FOXP1    |
| 2.46E-17 | 0.254510351 | 0.284 | 0.487 | 4.59E-13 | 9 | RNF41    |
| 4.63E-17 | 0.266284928 | 0.224 | 0.381 | 8.64E-13 | 9 | TAOK3    |
| 6.92E-17 | 0.283296669 | 0.167 | 0.31  | 1.29E-12 | 9 | EMC10    |
| 1.19E-16 | 0.289013379 | 0.198 | 0.326 | 2.21E-12 | 9 | MZB1     |
| 1.81E-16 | 0.261184719 | 0.155 | 0.283 | 3.37E-12 | 9 | DERL1    |
| 2.42E-16 | 0.261821088 | 0.206 | 0.379 | 4.52E-12 | 9 | WTAP     |
| 5.06E-16 | 0.262900603 | 0.222 | 0.397 | 9.43E-12 | 9 | NDUFV1   |
| 6.44E-16 | 0.265829746 | 0.226 | 0.394 | 1.20E-11 | 9 | CLASRP   |
| 6.62E-16 | 0.319224122 | 0.303 | 0.493 | 1.23E-11 | 9 | BCL11A   |
| 2.25E-15 | 0.254380411 | 0.127 | 0.228 | 4.20E-11 | 9 | PIH1D1   |
| 3.12E-15 | 0.276114717 | 0.254 | 0.404 | 5.82E-11 | 9 | SYAP1    |
| 3.53E-15 | 0.791471562 | 0.595 | 0.7   | 6.58E-11 | 9 | HNRNPU   |
| 4.28E-15 | 0.252096586 | 0.148 | 0.267 | 7.98E-11 | 9 | SNHG15   |
| 1.33E-14 | 0.270634942 | 0.185 | 0.305 | 2.47E-10 | 9 | DNMBP    |
| 1.42E-14 | 0.288129924 | 0.198 | 0.35  | 2.65E-10 | 9 | CCDC50   |
| 1.53E-14 | 0.297640269 | 0.329 | 0.587 | 2.85E-10 | 9 | GNAS     |
| 1.58E-14 | 0.318462595 | 0.276 | 0.48  | 2.95E-10 | 9 | RAD21    |
| 2.12E-14 | 0.322385883 | 0.229 | 0.417 | 3.96E-10 | 9 | RBBP6    |
| 2.13E-14 | 0.300090751 | 0.209 | 0.362 | 3.97E-10 | 9 | ZFR      |
| 2.41E-14 | 0.252963566 | 0.183 | 0.361 | 4.50E-10 | 9 | METAP2   |
| 3.04E-14 | 0.292262582 | 0.236 | 0.439 | 5.66E-10 | 9 | TAF7     |
| 3.51E-14 | 0.258059905 | 0.206 | 0.345 | 6.54E-10 | 9 | ALG13    |

|          |             |       |       |          |   |          |
|----------|-------------|-------|-------|----------|---|----------|
| 6.47E-14 | 0.369136841 | 0.296 | 0.49  | 1.21E-09 | 9 | NONO     |
| 8.96E-14 | 0.262603097 | 0.185 | 0.321 | 1.67E-09 | 9 | IFNAR1   |
| 1.49E-13 | 0.333377237 | 0.235 | 0.388 | 2.78E-09 | 9 | P2RY10   |
| 1.51E-13 | 0.621840299 | 0.601 | 0.741 | 2.81E-09 | 9 | ANKRD12  |
| 1.53E-13 | 0.665104937 | 0.567 | 0.69  | 2.85E-09 | 9 | EPC1     |
| 1.77E-13 | 0.252756743 | 0.414 | 0.683 | 3.30E-09 | 9 | CALR     |
| 2.13E-13 | 0.257527223 | 0.151 | 0.259 | 3.98E-09 | 9 | CASP3    |
| 2.15E-13 | 0.253237667 | 0.188 | 0.339 | 4.00E-09 | 9 | NAP1L4   |
| 2.30E-13 | 0.266585436 | 0.151 | 0.263 | 4.29E-09 | 9 | CGGBP1   |
| 2.70E-13 | 0.262373037 | 0.186 | 0.335 | 5.04E-09 | 9 | PMPCB    |
| 2.83E-13 | 0.355757068 | 0.353 | 0.598 | 5.28E-09 | 9 | YWHAQ    |
| 3.04E-13 | 0.251039698 | 0.344 | 0.608 | 5.67E-09 | 9 | SF3B2    |
| 3.95E-13 | 0.331141902 | 0.2   | 0.347 | 7.36E-09 | 9 | SHOC2    |
| 4.09E-13 | 0.285566475 | 0.206 | 0.373 | 7.63E-09 | 9 | DDX18    |
| 5.95E-13 | 0.254012101 | 0.165 | 0.292 | 1.11E-08 | 9 | EIF4G1   |
| 7.09E-13 | 0.259046754 | 0.187 | 0.334 | 1.32E-08 | 9 | ANP32E   |
| 7.29E-13 | 0.2754481   | 0.26  | 0.449 | 1.36E-08 | 9 | MBD4     |
| 9.75E-13 | 0.322967104 | 0.199 | 0.359 | 1.82E-08 | 9 | DNTTIP2  |
| 1.14E-12 | 0.355238189 | 0.276 | 0.465 | 2.13E-08 | 9 | NDFIP1   |
| 1.14E-12 | 0.311460347 | 0.207 | 0.363 | 2.13E-08 | 9 | TLN1     |
| 1.18E-12 | 0.252013458 | 0.181 | 0.31  | 2.20E-08 | 9 | SEL1L3   |
| 1.19E-12 | 0.251185167 | 0.158 | 0.289 | 2.22E-08 | 9 | TRIM44   |
| 1.39E-12 | 0.301855792 | 0.206 | 0.353 | 2.59E-08 | 9 | PHF20    |
| 1.77E-12 | 0.320873991 | 0.186 | 0.303 | 3.29E-08 | 9 | COQ10B   |
| 1.82E-12 | 0.271268931 | 0.216 | 0.378 | 3.39E-08 | 9 | FAM49B   |
| 1.93E-12 | 0.27867784  | 0.212 | 0.384 | 3.60E-08 | 9 | LSM8     |
| 2.23E-12 | 0.251150815 | 0.171 | 0.309 | 4.15E-08 | 9 | AKT2     |
| 2.32E-12 | 0.304924966 | 0.212 | 0.384 | 4.33E-08 | 9 | ARHGAP9  |
| 2.92E-12 | 0.275006442 | 0.16  | 0.271 | 5.44E-08 | 9 | GARS     |
| 2.95E-12 | 0.352260806 | 0.238 | 0.402 | 5.49E-08 | 9 | DDX46    |
| 3.16E-12 | 0.281319174 | 0.18  | 0.302 | 5.90E-08 | 9 | PIK3IP1  |
| 3.46E-12 | 0.252934147 | 0.169 | 0.315 | 6.45E-08 | 9 | MAP4     |
| 3.55E-12 | 0.274419245 | 0.164 | 0.301 | 6.62E-08 | 9 | TOR3A    |
| 4.35E-12 | 0.260105972 | 0.152 | 0.256 | 8.12E-08 | 9 | PPP1R16B |
| 5.10E-12 | 0.333101795 | 0.218 | 0.354 | 9.50E-08 | 9 | BBX      |
| 5.18E-12 | 0.266301395 | 0.211 | 0.376 | 9.65E-08 | 9 | MTCH1    |
| 5.85E-12 | 0.263476073 | 0.238 | 0.423 | 1.09E-07 | 9 | RBBP4    |
| 6.40E-12 | 0.341620916 | 0.296 | 0.472 | 1.19E-07 | 9 | FNBP1    |
| 8.77E-12 | 0.25455444  | 0.222 | 0.389 | 1.63E-07 | 9 | ANAPC5   |
| 1.09E-11 | 0.360719954 | 0.22  | 0.353 | 2.03E-07 | 9 | RSBN1L   |
| 1.14E-11 | 0.271125972 | 0.337 | 0.516 | 2.12E-07 | 9 | FAM129C  |
| 1.48E-11 | 0.325168884 | 0.175 | 0.295 | 2.75E-07 | 9 | NGDN     |
| 1.50E-11 | 0.301212395 | 0.217 | 0.375 | 2.79E-07 | 9 | HDAC7    |
| 1.92E-11 | 0.333425241 | 0.283 | 0.447 | 3.59E-07 | 9 | CFLAR    |
| 1.94E-11 | 0.30504836  | 0.182 | 0.315 | 3.62E-07 | 9 | GNAI3    |
| 2.10E-11 | 0.297935699 | 0.147 | 0.248 | 3.91E-07 | 9 | KIF2A    |

|          |             |       |       |          |   |          |
|----------|-------------|-------|-------|----------|---|----------|
| 2.55E-11 | 0.268326376 | 0.168 | 0.291 | 4.75E-07 | 9 | TIAL1    |
| 2.56E-11 | 0.291305932 | 0.208 | 0.348 | 4.77E-07 | 9 | ZFAND5   |
| 3.13E-11 | 0.298928382 | 0.163 | 0.268 | 5.84E-07 | 9 | DNAJB9   |
| 3.33E-11 | 0.251106095 | 0.357 | 0.591 | 6.20E-07 | 9 | UBE2B    |
| 5.16E-11 | 0.263437941 | 0.208 | 0.373 | 9.63E-07 | 9 | CDC40    |
| 5.18E-11 | 0.378664732 | 0.222 | 0.362 | 9.66E-07 | 9 | PTPN7    |
| 5.37E-11 | 0.30077219  | 0.241 | 0.405 | 1.00E-06 | 9 | CDKN1B   |
| 5.58E-11 | 0.313315404 | 0.265 | 0.469 | 1.04E-06 | 9 | PCGF5    |
| 5.96E-11 | 0.25763394  | 0.154 | 0.271 | 1.11E-06 | 9 | SMAP1    |
| 5.98E-11 | 0.334445887 | 0.204 | 0.369 | 1.11E-06 | 9 | NAPA     |
| 8.93E-11 | 0.322539604 | 0.182 | 0.298 | 1.67E-06 | 9 | NDE1     |
| 9.00E-11 | 0.326123403 | 0.248 | 0.415 | 1.68E-06 | 9 | HSPA4    |
| 1.21E-10 | 0.369052064 | 0.199 | 0.342 | 2.25E-06 | 9 | EIF4A3   |
| 1.37E-10 | 0.337326988 | 0.24  | 0.371 | 2.55E-06 | 9 | TBC1D22A |
| 1.44E-10 | 0.282088199 | 0.281 | 0.504 | 2.69E-06 | 9 | TERF2IP  |
| 1.44E-10 | 0.319606725 | 0.255 | 0.4   | 2.69E-06 | 9 | CLINT1   |
| 2.11E-10 | 0.263780492 | 0.149 | 0.25  | 3.93E-06 | 9 | SNX1     |
| 2.14E-10 | 0.27815392  | 0.145 | 0.246 | 3.99E-06 | 9 | SNRNP40  |
| 2.45E-10 | 0.615685273 | 0.535 | 0.677 | 4.57E-06 | 9 | DDX24    |
| 2.48E-10 | 0.28588388  | 0.207 | 0.381 | 4.62E-06 | 9 | TMC6     |
| 2.89E-10 | 0.391852314 | 0.271 | 0.43  | 5.39E-06 | 9 | UBE2J1   |
| 3.22E-10 | 0.345594303 | 0.206 | 0.355 | 5.99E-06 | 9 | DDX27    |
| 3.31E-10 | 0.35904114  | 0.237 | 0.374 | 6.18E-06 | 9 | SUPT5H   |
| 3.60E-10 | 0.305994805 | 0.176 | 0.289 | 6.71E-06 | 9 | ARL4A    |
| 3.61E-10 | 0.315760089 | 0.185 | 0.305 | 6.73E-06 | 9 | ATG12    |
| 4.08E-10 | 0.322380043 | 0.286 | 0.469 | 7.61E-06 | 9 | STRAP    |
| 4.41E-10 | 0.281744692 | 0.174 | 0.296 | 8.23E-06 | 9 | ERICH1   |
| 4.48E-10 | 0.366165432 | 0.182 | 0.291 | 8.36E-06 | 9 | NBPF14   |
| 5.22E-10 | 0.260573324 | 0.153 | 0.259 | 9.73E-06 | 9 | EFCAB14  |
| 5.53E-10 | 0.322715341 | 0.236 | 0.417 | 1.03E-05 | 9 | CCT2     |
| 7.13E-10 | 0.28625784  | 0.207 | 0.342 | 1.33E-05 | 9 | CCDC32   |
| 7.18E-10 | 0.324447818 | 0.199 | 0.31  | 1.34E-05 | 9 | SFMBT1   |
| 9.15E-10 | 0.522092821 | 0.584 | 0.767 | 1.71E-05 | 9 | EIF4G2   |
| 9.36E-10 | 0.312361611 | 0.171 | 0.273 | 1.75E-05 | 9 | C6orf62  |
| 1.24E-09 | 0.259835375 | 0.214 | 0.384 | 2.32E-05 | 9 | OS9      |
| 1.53E-09 | 0.305281033 | 0.281 | 0.458 | 2.86E-05 | 9 | PTPN2    |
| 1.62E-09 | 0.273669321 | 0.182 | 0.305 | 3.01E-05 | 9 | SRPK2    |
| 1.63E-09 | 0.324694212 | 0.191 | 0.314 | 3.04E-05 | 9 | SND1     |
| 1.73E-09 | 0.273981753 | 0.235 | 0.379 | 3.22E-05 | 9 | PAX5     |
| 1.79E-09 | 0.285451962 | 0.42  | 0.666 | 3.34E-05 | 9 | PRKCB    |
| 2.43E-09 | 0.357639211 | 0.188 | 0.308 | 4.53E-05 | 9 | ATXN2L   |
| 2.56E-09 | 0.277207216 | 0.354 | 0.584 | 4.77E-05 | 9 | FLNA     |
| 2.67E-09 | 0.27216874  | 0.295 | 0.504 | 4.98E-05 | 9 | PRKAR1A  |
| 2.69E-09 | 0.265418677 | 0.177 | 0.306 | 5.02E-05 | 9 | GIT2     |
| 2.83E-09 | 0.271971518 | 0.246 | 0.407 | 5.27E-05 | 9 | TMEM123  |
| 2.90E-09 | 0.655759494 | 0.523 | 0.636 | 5.40E-05 | 9 | AKAP13   |

|          |             |       |       |             |   |          |
|----------|-------------|-------|-------|-------------|---|----------|
| 3.34E-09 | 0.349013618 | 0.209 | 0.333 | 6.23E-05    | 9 | MIS18BP1 |
| 3.38E-09 | 0.273223718 | 0.305 | 0.526 | 6.29E-05    | 9 | HNRNPM   |
| 3.39E-09 | 0.311226575 | 0.162 | 0.278 | 6.31E-05    | 9 | EIF3J    |
| 3.45E-09 | 0.353008499 | 0.22  | 0.359 | 6.43E-05    | 9 | PRRC2A   |
| 3.66E-09 | 0.26904143  | 0.154 | 0.267 | 6.83E-05    | 9 | SUPT16H  |
| 3.80E-09 | 0.303169727 | 0.192 | 0.304 | 7.09E-05    | 9 | TMOD3    |
| 4.82E-09 | 0.322846729 | 0.253 | 0.416 | 8.98E-05    | 9 | ATP2A3   |
| 5.51E-09 | 0.27622903  | 0.182 | 0.321 | 0.00010268  | 9 | DCAF7    |
| 5.79E-09 | 0.28907361  | 0.179 | 0.29  | 0.000107954 | 9 | SYNRG    |
| 5.94E-09 | 0.252874381 | 0.144 | 0.253 | 0.000110766 | 9 | PSME3    |
| 5.95E-09 | 0.258002857 | 0.247 | 0.361 | 0.000110848 | 9 | DDIT3    |
| 6.08E-09 | 0.362883753 | 0.188 | 0.297 | 0.00011335  | 9 | ABCF1    |
| 6.13E-09 | 0.282527217 | 0.176 | 0.299 | 0.000114227 | 9 | FAM3C    |
| 6.65E-09 | 0.308868667 | 0.373 | 0.594 | 0.000123931 | 9 | THRAP3   |
| 7.02E-09 | 0.254396783 | 0.15  | 0.269 | 0.000130885 | 9 | DDB1     |
| 7.50E-09 | 0.30822339  | 0.236 | 0.386 | 0.000139764 | 9 | ACAP1    |
| 8.70E-09 | 0.286050535 | 0.24  | 0.376 | 0.000162246 | 9 | NFE2L2   |
| 9.18E-09 | 0.368508045 | 0.25  | 0.378 | 0.000171145 | 9 | WDR33    |
| 1.17E-08 | 0.319202819 | 0.263 | 0.405 | 0.000218168 | 9 | TENT5C   |
| 1.25E-08 | 0.470598288 | 0.236 | 0.386 | 0.00023233  | 9 | ENY2     |
| 1.46E-08 | 0.360764714 | 0.201 | 0.316 | 0.000272959 | 9 | ATP1B3   |
| 1.82E-08 | 0.267346752 | 0.254 | 0.448 | 0.000339824 | 9 | STAT6    |
| 2.00E-08 | 0.313436961 | 0.205 | 0.341 | 0.000373689 | 9 | SNX18    |
| 2.11E-08 | 0.293442909 | 0.174 | 0.284 | 0.000394249 | 9 | RNF115   |
| 2.12E-08 | 0.513892007 | 0.211 | 0.316 | 0.000395401 | 9 | ATF5     |
| 2.19E-08 | 0.733981946 | 0.553 | 0.657 | 0.000407801 | 9 | TRA2B    |
| 2.21E-08 | 0.319719494 | 0.201 | 0.303 | 0.00041143  | 9 | CEP350   |
| 2.26E-08 | 0.28539853  | 0.383 | 0.656 | 0.000421955 | 9 | CDC37    |
| 2.40E-08 | 0.344911934 | 0.194 | 0.311 | 0.000447035 | 9 | SYNCRIP  |
| 2.41E-08 | 0.378319296 | 0.316 | 0.514 | 0.000448986 | 9 | PAPOLA   |
| 2.65E-08 | 0.266960586 | 0.167 | 0.276 | 0.000494448 | 9 | ANKRD10  |
| 2.77E-08 | 0.294769443 | 0.256 | 0.423 | 0.000515847 | 9 | KLF2     |
| 2.78E-08 | 0.352909988 | 0.204 | 0.315 | 0.000517632 | 9 | SLC25A36 |
| 3.08E-08 | 0.356417932 | 0.184 | 0.287 | 0.000574321 | 9 | RSBN1    |
| 3.16E-08 | 0.345868442 | 0.344 | 0.538 | 0.00058931  | 9 | CD47     |
| 3.35E-08 | 0.281979932 | 0.175 | 0.303 | 0.000625145 | 9 | RAB10    |
| 3.63E-08 | 0.338968881 | 0.242 | 0.384 | 0.000675745 | 9 | SEC14L1  |
| 3.80E-08 | 0.378185913 | 0.253 | 0.408 | 0.000707794 | 9 | BPTF     |
| 4.32E-08 | 0.267362352 | 0.233 | 0.379 | 0.000806171 | 9 | GTF2I    |
| 4.45E-08 | 0.269899278 | 0.284 | 0.481 | 0.000829032 | 9 | EPB41    |
| 4.48E-08 | 0.26359384  | 0.171 | 0.302 | 0.000834972 | 9 | PDCD10   |
| 4.48E-08 | 0.251037963 | 0.162 | 0.275 | 0.000835141 | 9 | ARHGEF3  |
| 4.66E-08 | 0.323817167 | 0.283 | 0.483 | 0.000867777 | 9 | PNRC2    |
| 4.99E-08 | 0.364680279 | 0.29  | 0.466 | 0.000930748 | 9 | TTC3     |
| 5.18E-08 | 0.286552536 | 0.227 | 0.38  | 0.000966491 | 9 | KDM4B    |
| 6.06E-08 | 0.580436945 | 0.532 | 0.67  | 0.00112996  | 9 | ARGLU1   |



|          |             |       |       |             |   |         |
|----------|-------------|-------|-------|-------------|---|---------|
| 6.23E-08 | 0.326455703 | 0.198 | 0.317 | 0.001161093 | 9 | WAPL    |
| 8.19E-08 | 0.406895066 | 0.218 | 0.327 | 0.001527356 | 9 | BOD1L1  |
| 9.12E-08 | 0.265755511 | 0.27  | 0.439 | 0.001699887 | 9 | EBLN3P  |
| 1.17E-07 | 0.316995594 | 0.185 | 0.302 | 0.002177866 | 9 | IST1    |
| 1.36E-07 | 0.377184126 | 0.16  | 0.266 | 0.002528392 | 9 | STAP1   |
| 1.38E-07 | 0.324546717 | 0.206 | 0.328 | 0.002564653 | 9 | MIER1   |
| 1.52E-07 | 0.676793937 | 0.571 | 0.69  | 0.002825961 | 9 | BRD2    |
| 1.55E-07 | 0.501955733 | 0.292 | 0.49  | 0.002892582 | 9 | JUND    |
| 1.68E-07 | 0.285734541 | 0.149 | 0.273 | 0.00312567  | 9 | SNAP23  |
| 1.77E-07 | 0.344807584 | 0.349 | 0.571 | 0.003296502 | 9 | ACTR2   |
| 1.94E-07 | 0.301520878 | 0.231 | 0.385 | 0.00361709  | 9 | CSNK1D  |
| 2.14E-07 | 0.334413676 | 0.306 | 0.493 | 0.003991017 | 9 | WIPF1   |
| 2.68E-07 | 0.360646379 | 0.224 | 0.354 | 0.004993558 | 9 | ADPGK   |
| 2.90E-07 | 0.32824517  | 0.225 | 0.367 | 0.005409162 | 9 | UFM1    |
| 3.02E-07 | 0.374866796 | 0.219 | 0.333 | 0.005622404 | 9 | UHMK1   |
| 3.27E-07 | 0.262416335 | 0.151 | 0.254 | 0.006093131 | 9 | TMC8    |
| 3.43E-07 | 0.340441057 | 0.171 | 0.277 | 0.006392405 | 9 | ZBTB24  |
| 3.68E-07 | 0.362765906 | 0.201 | 0.319 | 0.006860223 | 9 | SMU1    |
| 3.88E-07 | 0.452337531 | 0.295 | 0.456 | 0.007223857 | 9 | MBP     |
| 4.25E-07 | 0.36162083  | 0.208 | 0.316 | 0.007920513 | 9 | SAP30BP |
| 4.29E-07 | 0.293967706 | 0.275 | 0.443 | 0.008005483 | 9 | PPM1K   |
| 4.70E-07 | 0.612670448 | 0.599 | 0.749 | 0.008760439 | 9 | PRRC2C  |
| 5.01E-07 | 0.445396391 | 0.317 | 0.488 | 0.009339003 | 9 | EIF5B   |
| 5.32E-07 | 0.338800843 | 0.269 | 0.421 | 0.009918017 | 9 | PLEKHA2 |
| 6.26E-07 | 0.350765821 | 0.202 | 0.31  | 0.011672902 | 9 | EP400   |
| 6.30E-07 | 0.308992618 | 0.211 | 0.333 | 0.011748091 | 9 | DGKA    |
| 6.32E-07 | 0.394158656 | 0.256 | 0.399 | 0.011778814 | 9 | ARHGAP4 |
| 6.33E-07 | 0.426865669 | 0.273 | 0.422 | 0.011799488 | 9 | U2SURP  |
| 7.11E-07 | 0.652492332 | 0.46  | 0.564 | 0.013255604 | 9 | SFPQ    |
| 7.86E-07 | 0.299573213 | 0.215 | 0.355 | 0.014657746 | 9 | STK10   |
| 9.21E-07 | 0.25407864  | 0.147 | 0.254 | 0.017163711 | 9 | IRF3    |
| 9.28E-07 | 0.346483489 | 0.192 | 0.308 | 0.017296941 | 9 | VPS4B   |
| 1.05E-06 | 0.411260139 | 0.264 | 0.414 | 0.019587842 | 9 | SRPRA   |
| 1.05E-06 | 0.483695559 | 0.267 | 0.378 | 0.019658905 | 9 | GNPTAB  |
| 1.09E-06 | 0.331608088 | 0.398 | 0.574 | 0.020292795 | 9 | IKZF3   |
| 1.12E-06 | 0.400574629 | 0.267 | 0.415 | 0.020934066 | 9 | PBXIP1  |
| 1.37E-06 | 0.354584928 | 0.217 | 0.365 | 0.025568898 | 9 | LAMP1   |
| 1.45E-06 | 0.340036564 | 0.29  | 0.481 | 0.026961285 | 9 | ARHGEF1 |
| 1.46E-06 | 0.271810802 | 0.151 | 0.257 | 0.027134762 | 9 | RBM22   |
| 1.85E-06 | 0.335212934 | 0.197 | 0.313 | 0.034507547 | 9 | ZNFX1   |
| 2.04E-06 | 0.304069512 | 0.216 | 0.323 | 0.037967559 | 9 | AP3B1   |
| 2.13E-06 | 0.352068718 | 0.206 | 0.309 | 0.039670384 | 9 | SFT2D2  |
| 2.26E-06 | 0.382374939 | 0.192 | 0.297 | 0.042046517 | 9 | COPB1   |
| 2.29E-06 | 0.433931939 | 0.667 | 0.81  | 0.042720798 | 9 | SARAF   |
| 2.30E-06 | 0.385835726 | 0.162 | 0.267 | 0.04291671  | 9 | KDM2B   |
| 2.76E-06 | 0.260485231 | 0.224 | 0.39  | 0.051358202 | 9 | IKZF1   |

|             |             |       |       |             |   |             |
|-------------|-------------|-------|-------|-------------|---|-------------|
| 2.85E-06    | 0.352372381 | 0.362 | 0.599 | 0.0531598   | 9 | CD53        |
| 3.46E-06    | 0.265232747 | 0.302 | 0.501 | 0.064478068 | 9 | KRAS        |
| 3.85E-06    | 0.36461425  | 0.216 | 0.328 | 0.07184991  | 9 | TMED4       |
| 3.87E-06    | 0.327028404 | 0.244 | 0.384 | 0.072215172 | 9 | CDK5RAP3    |
| 4.02E-06    | 0.354805903 | 0.31  | 0.494 | 0.074843839 | 9 | HNRNPH3     |
| 5.44E-06    | 0.363045007 | 0.305 | 0.474 | 0.101356145 | 9 | NCOR1       |
| 5.57E-06    | 0.34623735  | 0.301 | 0.475 | 0.103901104 | 9 | AMD1        |
| 6.21E-06    | 0.64953457  | 0.462 | 0.582 | 0.115794506 | 9 | VCP         |
| 6.40E-06    | 0.383417982 | 0.339 | 0.537 | 0.119350201 | 9 | CDC42SE2    |
| 7.23E-06    | 0.31170303  | 0.179 | 0.294 | 0.134841498 | 9 | RAB1A       |
| 9.92E-06    | 0.351209198 | 0.353 | 0.544 | 0.18499772  | 9 | GGA2        |
| 1.09E-05    | 0.364221965 | 0.263 | 0.39  | 0.203000549 | 9 | RIC3        |
| 1.12E-05    | 0.307436016 | 0.205 | 0.349 | 0.208658751 | 9 | DNAJC7      |
| 1.33E-05    | 0.384564446 | 0.38  | 0.571 | 0.247361131 | 9 | ARHGAP25    |
| 1.36E-05    | 0.459269781 | 0.226 | 0.355 | 0.253162273 | 9 | TMX4        |
| 1.43E-05    | 0.372066176 | 0.209 | 0.311 | 0.266483943 | 9 | PPP4R3A     |
| 1.51E-05    | 0.364182537 | 0.22  | 0.329 | 0.281245661 | 9 | PNPLA8      |
| 1.52E-05    | 0.445654808 | 0.233 | 0.337 | 0.282429846 | 9 | TOX4        |
| 1.80E-05    | 0.459581196 | 0.242 | 0.355 | 0.33607034  | 9 | THUMPD3-AS1 |
| 1.85E-05    | 0.425142232 | 0.233 | 0.343 | 0.345660815 | 9 | WAC         |
| 2.09E-05    | 0.378409246 | 0.22  | 0.336 | 0.390194623 | 9 | ETF1        |
| 2.31E-05    | 0.434217734 | 0.243 | 0.374 | 0.43096489  | 9 | NUAK2       |
| 2.44E-05    | 0.349581892 | 0.4   | 0.615 | 0.454120047 | 9 | SPOCK2      |
| 2.68E-05    | 0.391762606 | 0.272 | 0.391 | 0.499398601 | 9 | ZNF107      |
| 2.86E-05    | 0.412612321 | 0.312 | 0.488 | 0.53370977  | 9 | TAX1BP1     |
| 2.87E-05    | 0.300726131 | 0.213 | 0.359 | 0.535329506 | 9 | NUMA1       |
| 3.08E-05    | 0.295999564 | 0.18  | 0.284 | 0.574886319 | 9 | VPS36       |
| 3.10E-05    | 0.436965085 | 0.227 | 0.329 | 0.578075399 | 9 | OSBPL8      |
| 3.28E-05    | 0.371012057 | 0.37  | 0.571 | 0.610531009 | 9 | KPNB1       |
| 3.49E-05    | 0.368814234 | 0.321 | 0.501 | 0.650196949 | 9 | ELOVL5      |
| 3.67E-05    | 0.408811032 | 0.28  | 0.442 | 0.684985871 | 9 | RTN4        |
| 3.84E-05    | 0.64430114  | 0.237 | 0.344 | 0.71500818  | 9 | MIR155HG    |
| 4.03E-05    | 0.421316443 | 0.432 | 0.645 | 0.75039896  | 9 | SRRM2       |
| 4.99E-05    | 0.443397218 | 0.283 | 0.401 | 0.929659299 | 9 | ACIN1       |
| 5.12E-05    | 0.391094027 | 0.218 | 0.339 | 0.953592587 | 9 | STAT1       |
| 5.50E-05    | 0.295957208 | 0.164 | 0.268 | 1           | 9 | MICAL1      |
| 6.59E-05    | 0.844902309 | 0.445 | 0.557 | 1           | 9 | HSPA5       |
| 7.03E-05    | 0.370654053 | 0.362 | 0.571 | 1           | 9 | ACTR3       |
| 7.61E-05    | 0.526929035 | 0.572 | 0.726 | 1           | 9 | EIF5        |
| 8.49E-05    | 0.332327379 | 0.333 | 0.525 | 1           | 9 | PTPN1       |
| 9.14E-05    | 0.40383978  | 0.291 | 0.438 | 1           | 9 | MTSS1       |
| 0.000104808 | 0.381149238 | 0.26  | 0.404 | 1           | 9 | INSIG1      |
| 0.000126942 | 0.46245398  | 0.347 | 0.528 | 1           | 9 | KTN1        |
| 0.00014209  | 0.391442334 | 0.2   | 0.307 | 1           | 9 | TROVE2      |
| 0.000152248 | 0.423340807 | 0.296 | 0.461 | 1           | 9 | RSF1        |
| 0.00018666  | 0.442516937 | 0.309 | 0.454 | 1           | 9 | ADAR        |

|             |             |       |       |   |   |          |
|-------------|-------------|-------|-------|---|---|----------|
| 0.000188498 | 0.558003742 | 0.403 | 0.526 | 1 | 9 | ROCK1    |
| 0.000197837 | 0.623788327 | 0.487 | 0.617 | 1 | 9 | SCAF11   |
| 0.000212674 | 0.424186011 | 0.419 | 0.631 | 1 | 9 | PAK2     |
| 0.000310046 | 0.397522797 | 0.245 | 0.362 | 1 | 9 | CNOT1    |
| 0.000340148 | 0.540232883 | 0.49  | 0.61  | 1 | 9 | NCOA3    |
| 0.000359462 | 0.475846263 | 0.248 | 0.379 | 1 | 9 | TCP1     |
| 0.000378193 | 0.398969807 | 0.329 | 0.513 | 1 | 9 | CD164    |
| 0.000379275 | 0.34527394  | 0.249 | 0.367 | 1 | 9 | CREB3L2  |
| 0.000428567 | 0.367000537 | 0.468 | 0.697 | 1 | 9 | YBX3     |
| 0.00053535  | 0.601659126 | 0.475 | 0.599 | 1 | 9 | ELF1     |
| 0.000603642 | 0.289555374 | 0.376 | 0.542 | 1 | 9 | STX7     |
| 0.000608292 | 0.462663248 | 0.29  | 0.396 | 1 | 9 | DOCK8    |
| 0.000643108 | 0.345448198 | 0.274 | 0.393 | 1 | 9 | Mar-01   |
| 0.00065398  | 0.366502084 | 0.249 | 0.383 | 1 | 9 | CELF1    |
| 0.000719766 | 0.386203496 | 0.215 | 0.324 | 1 | 9 | TACC1    |
| 0.000773748 | 0.342834217 | 0.177 | 0.284 | 1 | 9 | HIF1A    |
| 0.000880066 | 0.339060305 | 0.193 | 0.309 | 1 | 9 | RAB6A    |
| 0.000901146 | 0.412618782 | 0.269 | 0.389 | 1 | 9 | LENG8    |
| 0.000966695 | 0.465793222 | 0.288 | 0.411 | 1 | 9 | WDFY4    |
| 0.001126214 | 0.513903126 | 0.285 | 0.412 | 1 | 9 | ANKRD11  |
| 0.001174885 | 0.449701131 | 0.326 | 0.468 | 1 | 9 | CAPZA1   |
| 0.001216778 | 0.430093374 | 0.235 | 0.36  | 1 | 9 | PLEC     |
| 0.001330302 | 0.412437055 | 0.269 | 0.388 | 1 | 9 | USP11    |
| 0.001357885 | 0.627196041 | 0.443 | 0.55  | 1 | 9 | CELF2    |
| 0.00148872  | 0.402955376 | 0.28  | 0.408 | 1 | 9 | CHD9     |
| 0.001538111 | 0.381436103 | 0.236 | 0.368 | 1 | 9 | SBNO1    |
| 0.001667761 | 0.395932908 | 0.257 | 0.401 | 1 | 9 | G3BP1    |
| 0.001686434 | 0.416808759 | 0.252 | 0.362 | 1 | 9 | MORC3    |
| 0.001698921 | 0.504150845 | 0.26  | 0.363 | 1 | 9 | NASP     |
| 0.001810344 | 0.504591239 | 0.285 | 0.414 | 1 | 9 | PPP2R5C  |
| 0.001870886 | 0.391753555 | 0.779 | 0.905 | 1 | 9 | HLA-DQB1 |
| 0.002169268 | 0.39557567  | 0.267 | 0.381 | 1 | 9 | WDR11    |
| 0.002177974 | 0.684029014 | 0.447 | 0.558 | 1 | 9 | IL10RA   |
| 0.002181032 | 0.641547061 | 0.429 | 0.532 | 1 | 9 | ITSN2    |
| 0.00236188  | 0.421484391 | 0.371 | 0.534 | 1 | 9 | ST6GAL1  |
| 0.002972133 | 0.403493637 | 0.421 | 0.633 | 1 | 9 | SH3BP5   |
| 0.003015843 | 0.564735497 | 0.427 | 0.535 | 1 | 9 | LUC7L3   |
| 0.003501234 | 0.422435218 | 0.291 | 0.415 | 1 | 9 | NCKAP1L  |
| 0.004808719 | 0.386351995 | 0.584 | 0.798 | 1 | 9 | GRB2     |
| 0.005601439 | 0.556209514 | 0.297 | 0.405 | 1 | 9 | TANK     |
| 0.005913638 | 0.37374546  | 0.232 | 0.341 | 1 | 9 | RNF149   |
| 0.005931781 | 0.432126677 | 0.232 | 0.333 | 1 | 9 | RNF138   |
| 0.006764783 | 0.546480885 | 0.51  | 0.667 | 1 | 9 | HNRNPA3  |
| 0.006807683 | 0.471895877 | 0.263 | 0.367 | 1 | 9 | SPTAN1   |
| 0.007349054 | 0.4189427   | 0.412 | 0.607 | 1 | 9 | JAK1     |
| 0.007703962 | 0.415342894 | 0.312 | 0.432 | 1 | 9 | SP140    |

|             |             |       |       |           |    |            |
|-------------|-------------|-------|-------|-----------|----|------------|
| 0.007901561 | 0.423564705 | 0.366 | 0.541 | 1         | 9  | RBMX       |
| 0.007919293 | 0.627655314 | 0.457 | 0.576 | 1         | 9  | TAF1D      |
| 0.008660843 | 0.502876227 | 0.576 | 0.739 | 1         | 9  | SRSF5      |
| 0.00965119  | 0.473617454 | 0.277 | 0.413 | 1         | 9  | ARF4       |
| 0           | 1.971244018 | 0.978 | 0.751 | 0         | 10 | RALGPS2    |
| 0           | 1.911519998 | 0.966 | 0.676 | 0         | 10 | DDX17      |
| 0           | 1.88466106  | 0.879 | 0.519 | 0         | 10 | STX7       |
| 0           | 1.827397808 | 0.826 | 0.392 | 0         | 10 | PARP15     |
| 0           | 1.679580064 | 0.871 | 0.53  | 0         | 10 | MSI2       |
| 0           | 1.635837478 | 0.871 | 0.56  | 0         | 10 | CDK14      |
| 0           | 1.633214299 | 0.868 | 0.575 | 0         | 10 | ABCA6      |
| 0           | 1.522793613 | 0.906 | 0.646 | 0         | 10 | AFF3       |
| 5.88E-308   | 1.265248918 | 0.935 | 0.832 | 1.10E-303 | 10 | SF1        |
| 4.78E-295   | 1.361548497 | 0.892 | 0.715 | 8.91E-291 | 10 | ARHGAP24   |
| 1.09E-292   | 1.432944594 | 0.902 | 0.704 | 2.03E-288 | 10 | SMCHD1     |
| 3.64E-237   | 1.229011782 | 0.868 | 0.657 | 6.79E-233 | 10 | RSRP1      |
| 2.66E-232   | 1.409551773 | 0.791 | 0.505 | 4.96E-228 | 10 | OGT        |
| 4.17E-231   | 1.517035658 | 0.717 | 0.347 | 7.77E-227 | 10 | CAMK2D     |
| 1.90E-225   | 1.436807841 | 0.78  | 0.52  | 3.55E-221 | 10 | BCL2       |
| 2.53E-225   | 1.394353155 | 0.711 | 0.365 | 4.71E-221 | 10 | NKTR       |
| 1.26E-214   | 1.386333041 | 0.765 | 0.481 | 2.35E-210 | 10 | ANKRD44    |
| 2.11E-211   | 1.37256992  | 0.743 | 0.457 | 3.93E-207 | 10 | TUT4       |
| 1.27E-207   | 1.327158168 | 0.819 | 0.631 | 2.37E-203 | 10 | CCDC88A    |
| 7.80E-203   | 1.387321854 | 0.815 | 0.625 | 1.45E-198 | 10 | RIPOR2     |
| 2.53E-198   | 1.912775246 | 0.594 | 0.19  | 4.71E-194 | 10 | SERINC5    |
| 1.09E-192   | 1.080519406 | 0.902 | 0.785 | 2.02E-188 | 10 | FUS        |
| 2.11E-192   | 1.103727392 | 0.811 | 0.668 | 3.94E-188 | 10 | SF3B1      |
| 2.09E-189   | 1.406108319 | 0.796 | 0.562 | 3.89E-185 | 10 | TTN        |
| 1.41E-188   | 1.268920886 | 0.77  | 0.543 | 2.63E-184 | 10 | SSH2       |
| 2.89E-187   | 1.197799816 | 0.744 | 0.527 | 5.38E-183 | 10 | N4BP2L2    |
| 7.27E-186   | 1.277115607 | 0.736 | 0.459 | 1.36E-181 | 10 | SNRNP70    |
| 1.42E-182   | 1.241930861 | 0.714 | 0.463 | 2.65E-178 | 10 | OGA        |
| 5.63E-182   | 1.482098284 | 0.651 | 0.339 | 1.05E-177 | 10 | GABPB1-AS1 |
| 1.20E-178   | 1.422112121 | 0.597 | 0.234 | 2.25E-174 | 10 | CCDC141    |
| 4.44E-177   | 1.089203303 | 0.812 | 0.647 | 8.28E-173 | 10 | SRSF11     |
| 7.27E-177   | 1.585164996 | 0.67  | 0.338 | 1.36E-172 | 10 | CLNK       |
| 6.91E-176   | 1.225502784 | 0.685 | 0.42  | 1.29E-171 | 10 | TMEM131L   |
| 3.66E-175   | 1.327673991 | 0.652 | 0.329 | 6.82E-171 | 10 | MCTP2      |
| 6.36E-172   | 1.12438225  | 0.761 | 0.559 | 1.18E-167 | 10 | PNN        |
| 6.68E-169   | 1.133197458 | 0.771 | 0.597 | 1.24E-164 | 10 | NCOA3      |
| 3.19E-168   | 1.349812665 | 0.673 | 0.392 | 5.94E-164 | 10 | ATM        |
| 2.57E-167   | 1.3199843   | 0.628 | 0.28  | 4.79E-163 | 10 | RNPC3      |
| 2.14E-164   | 1.131007452 | 0.729 | 0.522 | 3.98E-160 | 10 | LUC7L3     |
| 1.15E-162   | 1.455093702 | 0.76  | 0.537 | 2.14E-158 | 10 | LRMP       |
| 1.59E-162   | 0.976807396 | 0.835 | 0.732 | 2.96E-158 | 10 | PNISR      |
| 2.66E-161   | 1.328497016 | 0.578 | 0.249 | 4.96E-157 | 10 | UTY        |

|           |             |       |       |           |    |            |
|-----------|-------------|-------|-------|-----------|----|------------|
| 3.77E-161 | 1.408562208 | 0.558 | 0.207 | 7.03E-157 | 10 | GAB1       |
| 6.36E-161 | 1.233243674 | 0.697 | 0.453 | 1.18E-156 | 10 | VPS13C     |
| 7.50E-151 | 1.260613863 | 0.597 | 0.304 | 1.40E-146 | 10 | PHC3       |
| 7.31E-149 | 1.12720013  | 0.721 | 0.537 | 1.36E-144 | 10 | CELF2      |
| 1.21E-147 | 1.072940403 | 0.729 | 0.556 | 2.26E-143 | 10 | USP15      |
| 1.39E-147 | 1.177258327 | 0.693 | 0.488 | 2.58E-143 | 10 | INPP5F     |
| 1.01E-146 | 1.124565409 | 0.669 | 0.439 | 1.89E-142 | 10 | ARHGAP15   |
| 3.70E-146 | 1.132287395 | 0.735 | 0.559 | 6.89E-142 | 10 | IKZF3      |
| 9.04E-146 | 0.988754277 | 0.767 | 0.632 | 1.69E-141 | 10 | RUBCNL     |
| 2.27E-144 | 1.290626634 | 0.711 | 0.499 | 4.23E-140 | 10 | FAM129C    |
| 7.36E-144 | 1.195446616 | 0.609 | 0.315 | 1.37E-139 | 10 | DOCK10     |
| 3.39E-142 | 1.247351814 | 0.623 | 0.359 | 6.31E-138 | 10 | ARID1B     |
| 7.74E-142 | 1.077592556 | 0.633 | 0.415 | 1.44E-137 | 10 | SNX29      |
| 6.24E-140 | 0.981320887 | 0.751 | 0.619 | 1.16E-135 | 10 | JMJD1C     |
| 1.06E-136 | 1.040188252 | 0.685 | 0.504 | 1.98E-132 | 10 | UVRAG      |
| 6.75E-134 | 1.030129013 | 0.722 | 0.546 | 1.26E-129 | 10 | PELI1      |
| 2.25E-133 | 1.08521619  | 0.397 | 0.093 | 4.20E-129 | 10 | TRIM73     |
| 2.56E-132 | 0.879949512 | 0.894 | 0.785 | 4.77E-128 | 10 | TXNIP      |
| 1.91E-131 | 1.09496203  | 0.646 | 0.416 | 3.55E-127 | 10 | ZNF292     |
| 4.45E-131 | 1.077532877 | 0.674 | 0.457 | 8.29E-127 | 10 | ZCCHC7     |
| 6.79E-131 | 1.143097023 | 0.5   | 0.198 | 1.27E-126 | 10 | KHDRBS2    |
| 1.42E-129 | 1.13350453  | 0.514 | 0.252 | 2.64E-125 | 10 | BTLA       |
| 2.37E-127 | 1.18661595  | 0.482 | 0.189 | 4.42E-123 | 10 | HIBCH      |
| 2.59E-125 | 1.181465123 | 0.504 | 0.198 | 4.83E-121 | 10 | ADAMTS6    |
| 1.67E-124 | 1.070318297 | 0.633 | 0.406 | 3.11E-120 | 10 | ZRANB2     |
| 2.53E-124 | 1.174090337 | 0.442 | 0.142 | 4.71E-120 | 10 | FTX        |
| 8.14E-124 | 1.051532272 | 0.736 | 0.622 | 1.52E-119 | 10 | SLC38A1    |
| 5.73E-121 | 1.185614764 | 0.504 | 0.225 | 1.07E-116 | 10 | ADAM19     |
| 1.92E-119 | 1.314213871 | 0.668 | 0.476 | 3.59E-115 | 10 | BCL11A     |
| 2.13E-119 | 1.249284587 | 0.63  | 0.377 | 3.96E-115 | 10 | Mar-01     |
| 3.04E-118 | 1.16359272  | 0.533 | 0.264 | 5.66E-114 | 10 | IMMP2L     |
| 2.75E-117 | 1.170734404 | 0.712 | 0.536 | 5.13E-113 | 10 | LINC00926  |
| 6.00E-116 | 1.075550509 | 0.487 | 0.228 | 1.12E-111 | 10 | GOLGA8B    |
| 1.43E-112 | 1.158084726 | 0.601 | 0.351 | 2.67E-108 | 10 | CREB3L2    |
| 1.87E-112 | 1.143093174 | 0.616 | 0.355 | 3.49E-108 | 10 | MDM4       |
| 2.30E-112 | 1.074762178 | 0.62  | 0.423 | 4.28E-108 | 10 | EBLN3P     |
| 2.24E-111 | 0.980405319 | 0.655 | 0.514 | 4.18E-107 | 10 | ABI1       |
| 1.62E-110 | 1.050848973 | 0.49  | 0.236 | 3.01E-106 | 10 | SLC23A2    |
| 7.31E-110 | 1.034806978 | 0.503 | 0.281 | 1.36E-105 | 10 | FCHSD2     |
| 2.11E-109 | 1.003038308 | 0.583 | 0.383 | 3.94E-105 | 10 | PPP4R3B    |
| 6.99E-107 | 1.115208054 | 0.531 | 0.289 | 1.30E-102 | 10 | TTC14      |
| 1.13E-106 | 1.011163402 | 0.648 | 0.502 | 2.10E-102 | 10 | RABGAP1L   |
| 1.51E-106 | 1.032144846 | 0.527 | 0.286 | 2.81E-102 | 10 | PHTF2      |
| 1.91E-106 | 1.198806336 | 0.547 | 0.286 | 3.55E-102 | 10 | NSF        |
| 4.20E-106 | 1.294110484 | 0.472 | 0.204 | 7.82E-102 | 10 | AC063949.2 |
| 1.08E-105 | 1.193187286 | 0.409 | 0.129 | 2.01E-101 | 10 | HDAC9      |

|           |             |       |       |           |    |                       |
|-----------|-------------|-------|-------|-----------|----|-----------------------|
| 4.40E-105 | 1.04589687  | 0.496 | 0.246 | 8.21E-101 | 10 | DDHD1                 |
| 5.00E-105 | 1.107179335 | 0.528 | 0.264 | 9.31E-101 | 10 | MCOLN2                |
| 9.49E-105 | 1.011739408 | 0.607 | 0.425 | 1.77E-100 | 10 | EML4                  |
| 1.28E-102 | 1.018621829 | 0.55  | 0.343 | 2.38E-98  | 10 | NFAT5                 |
| 8.78E-102 | 1.066210994 | 0.56  | 0.343 | 1.64E-97  | 10 | UTRN                  |
| 2.58E-100 | 1.077629466 | 0.551 | 0.302 | 4.81E-96  | 10 | CD46                  |
| 8.02E-100 | 0.982881674 | 0.575 | 0.384 | 1.50E-95  | 10 | ASH1L                 |
| 2.21E-99  | 1.010544333 | 0.433 | 0.188 | 4.12E-95  | 10 | STAMBPL1              |
| 3.65E-99  | 1.080767101 | 0.484 | 0.237 | 6.81E-95  | 10 | CBLB                  |
| 4.13E-99  | 1.100352782 | 0.482 | 0.248 | 7.70E-95  | 10 | DNAJC10               |
| 1.32E-98  | 0.916192248 | 0.702 | 0.598 | 2.45E-94  | 10 | SWAP70                |
| 3.40E-98  | 0.81747218  | 0.756 | 0.655 | 6.34E-94  | 10 | CCNL1                 |
| 4.98E-98  | 1.498141671 | 0.533 | 0.28  | 9.28E-94  | 10 | ZNF266                |
| 8.23E-98  | 1.008643182 | 0.461 | 0.212 | 1.53E-93  | 10 | CREBZF                |
| 1.28E-96  | 0.933931716 | 0.526 | 0.366 | 2.39E-92  | 10 | GTF2I                 |
| 1.53E-96  | 1.168379966 | 0.577 | 0.364 | 2.86E-92  | 10 | CIITA                 |
| 2.02E-96  | 0.994008209 | 0.55  | 0.341 | 3.76E-92  | 10 | RNF19A                |
| 2.15E-96  | 1.025923879 | 0.66  | 0.524 | 4.00E-92  | 10 | CD47                  |
| 4.88E-96  | 0.93563092  | 0.577 | 0.436 | 9.10E-92  | 10 | SMG1                  |
| 1.23E-95  | 1.02739781  | 0.55  | 0.368 | 2.28E-91  | 10 | WDR11                 |
| 3.38E-95  | 0.994785422 | 0.517 | 0.307 | 6.31E-91  | 10 | SLC9A7                |
| 2.34E-94  | 1.068504861 | 0.456 | 0.19  | 4.35E-90  | 10 | MAML2                 |
| 9.77E-94  | 0.918537085 | 0.714 | 0.48  | 1.82E-89  | 10 | IGLL5                 |
| 7.80E-93  | 0.927226176 | 0.445 | 0.221 | 1.45E-88  | 10 | EXOC4                 |
| 9.30E-93  | 0.939841789 | 0.513 | 0.313 | 1.73E-88  | 10 | TTC17                 |
| 1.42E-92  | 1.100260819 | 0.555 | 0.315 | 2.65E-88  | 10 | TLE4                  |
| 1.73E-92  | 0.921881848 | 0.609 | 0.47  | 3.23E-88  | 10 | PCM1                  |
| 3.76E-91  | 0.978740849 | 0.643 | 0.523 | 7.02E-87  | 10 | TNRC6B                |
| 3.71E-90  | 1.031910939 | 0.436 | 0.195 | 6.92E-86  | 10 | RASA1                 |
| 4.79E-90  | 0.964275678 | 0.525 | 0.338 | 8.93E-86  | 10 | BIRC6                 |
| 6.66E-90  | 1.123991382 | 0.535 | 0.32  | 1.24E-85  | 10 | DMD                   |
| 8.95E-89  | 1.065114151 | 0.582 | 0.376 | 1.67E-84  | 10 | ZBTB20                |
| 1.17E-88  | 1.069699654 | 0.489 | 0.236 | 2.18E-84  | 10 | JAK2                  |
| 3.74E-88  | 1.033941358 | 0.564 | 0.378 | 6.97E-84  | 10 | ZNF107                |
| 8.39E-88  | 1.041968957 | 0.573 | 0.343 | 1.56E-83  | 10 | ACSM3                 |
| 9.50E-88  | 0.951836385 | 0.5   | 0.297 | 1.77E-83  | 10 | FRYL                  |
| 2.06E-87  | 0.933962803 | 0.441 | 0.212 | 3.84E-83  | 10 | CCNT2                 |
| 5.58E-86  | 0.961835926 | 0.631 | 0.475 | 1.04E-81  | 10 | TLK1                  |
| 1.88E-85  | 0.937738251 | 0.511 | 0.32  | 3.50E-81  | 10 | MATR3-ENSG00000015479 |
| 1.52E-84  | 0.921571302 | 0.627 | 0.517 | 2.83E-80  | 10 | ZNF207                |
| 2.93E-84  | 0.928577403 | 0.405 | 0.178 | 5.46E-80  | 10 | FBXL20                |
| 3.17E-84  | 0.968467826 | 0.489 | 0.279 | 5.92E-80  | 10 | MAN2A1                |
| 1.17E-83  | 1.004728624 | 0.459 | 0.255 | 2.19E-79  | 10 | PARP14                |
| 2.56E-83  | 1.012367924 | 0.316 | 0.087 | 4.77E-79  | 10 | AL445673.1            |
| 2.93E-83  | 0.994072835 | 0.6   | 0.443 | 5.45E-79  | 10 | HNRNPH1               |
| 1.47E-81  | 0.85779827  | 0.599 | 0.487 | 2.74E-77  | 10 | LMBRD1                |

|          |             |       |       |          |    |                         |
|----------|-------------|-------|-------|----------|----|-------------------------|
| 1.60E-81 | 0.981154684 | 0.38  | 0.148 | 2.97E-77 | 10 | POLR2J3-ENSG00000285437 |
| 1.61E-81 | 0.937662318 | 0.483 | 0.296 | 3.00E-77 | 10 | PCMTD1                  |
| 7.59E-81 | 1.082245393 | 0.491 | 0.27  | 1.42E-76 | 10 | SLC12A6                 |
| 1.25E-80 | 0.990405076 | 0.387 | 0.156 | 2.33E-76 | 10 | LRRK2                   |
| 2.48E-79 | 1.021187116 | 0.581 | 0.443 | 4.62E-75 | 10 | ATF7IP                  |
| 3.39E-79 | 0.860545085 | 0.375 | 0.16  | 6.32E-75 | 10 | DIP2B                   |
| 3.75E-79 | 0.920580162 | 0.581 | 0.391 | 6.99E-75 | 10 | SKAP1                   |
| 7.85E-79 | 1.033138091 | 0.579 | 0.39  | 1.46E-74 | 10 | TRAF3IP3                |
| 1.22E-78 | 0.954302223 | 0.559 | 0.403 | 2.28E-74 | 10 | NCKAP1L                 |
| 3.91E-78 | 0.939087958 | 0.435 | 0.211 | 7.29E-74 | 10 | CEP95                   |
| 1.30E-77 | 1.23896758  | 0.628 | 0.499 | 2.43E-73 | 10 | IL4R                    |
| 2.58E-77 | 0.860681472 | 0.351 | 0.131 | 4.82E-73 | 10 | ZNF708                  |
| 6.52E-77 | 1.248176059 | 0.456 | 0.237 | 1.21E-72 | 10 | PCDH9                   |
| 1.28E-76 | 0.911755926 | 0.447 | 0.242 | 2.38E-72 | 10 | MON2                    |
| 1.02E-75 | 1.015462418 | 0.609 | 0.465 | 1.90E-71 | 10 | PLEKHG1                 |
| 1.06E-74 | 0.874393137 | 0.459 | 0.278 | 1.98E-70 | 10 | RIC1                    |
| 1.23E-74 | 1.00455906  | 0.467 | 0.278 | 2.30E-70 | 10 | WDFY1                   |
| 1.56E-74 | 0.845987588 | 0.536 | 0.412 | 2.91E-70 | 10 | PHF3                    |
| 2.47E-74 | 0.840215731 | 0.357 | 0.159 | 4.60E-70 | 10 | AVL9                    |
| 8.01E-74 | 0.984655168 | 0.433 | 0.213 | 1.49E-69 | 10 | AC119396.1              |
| 1.49E-73 | 0.936735149 | 0.546 | 0.396 | 2.78E-69 | 10 | CHD9                    |
| 4.42E-73 | 0.911202025 | 0.428 | 0.224 | 8.23E-69 | 10 | DMTF1                   |
| 5.74E-73 | 0.932394672 | 0.589 | 0.464 | 1.07E-68 | 10 | ADAM28                  |
| 1.33E-72 | 0.960126142 | 0.509 | 0.322 | 2.49E-68 | 10 | AL158850.1              |
| 1.34E-72 | 0.83893051  | 0.55  | 0.445 | 2.50E-68 | 10 | MYCBP2                  |
| 3.79E-72 | 0.86952599  | 0.395 | 0.2   | 7.06E-68 | 10 | VPS13B                  |
| 5.90E-72 | 0.868444798 | 0.257 | 0.056 | 1.10E-67 | 10 | RGPD2                   |
| 2.55E-71 | 0.857264527 | 0.585 | 0.458 | 4.76E-67 | 10 | NIPBL                   |
| 5.24E-71 | 0.95544969  | 0.52  | 0.349 | 9.77E-67 | 10 | SREK1                   |
| 2.68E-70 | 0.822935276 | 0.328 | 0.13  | 4.99E-66 | 10 | CCDC14                  |
| 7.80E-70 | 0.840948789 | 0.367 | 0.182 | 1.45E-65 | 10 | STX16                   |
| 9.28E-70 | 0.944587757 | 0.443 | 0.259 | 1.73E-65 | 10 | TRAF5                   |
| 2.14E-69 | 0.872282783 | 0.416 | 0.236 | 3.99E-65 | 10 | XRN1                    |
| 2.83E-69 | 0.885920146 | 0.556 | 0.416 | 5.28E-65 | 10 | NEMF                    |
| 3.40E-69 | 1.006057405 | 0.438 | 0.237 | 6.35E-65 | 10 | CD84                    |
| 8.86E-69 | 0.934374497 | 0.477 | 0.279 | 1.65E-64 | 10 | TBC1D5                  |
| 4.72E-68 | 0.928558655 | 0.491 | 0.32  | 8.80E-64 | 10 | LPP                     |
| 5.73E-68 | 0.884487074 | 0.436 | 0.269 | 1.07E-63 | 10 | KANSL1                  |
| 1.18E-67 | 0.95081611  | 0.489 | 0.322 | 2.19E-63 | 10 | USP34                   |
| 2.08E-67 | 0.996126444 | 0.475 | 0.257 | 3.89E-63 | 10 | GSAP                    |
| 2.67E-67 | 0.884353892 | 0.375 | 0.188 | 4.97E-63 | 10 | NUP88                   |
| 2.70E-67 | 0.8969857   | 0.344 | 0.135 | 5.03E-63 | 10 | ZDHHC21                 |
| 2.83E-67 | 0.91427283  | 0.427 | 0.277 | 5.27E-63 | 10 | CLEC17A                 |
| 5.35E-67 | 1.108568583 | 0.457 | 0.25  | 9.97E-63 | 10 | ARHGAP44                |
| 2.84E-65 | 0.87680517  | 0.552 | 0.421 | 5.30E-61 | 10 | SP140                   |
| 5.68E-65 | 0.826917897 | 0.348 | 0.147 | 1.06E-60 | 10 | RUNX1                   |

|          |             |       |       |          |    |             |
|----------|-------------|-------|-------|----------|----|-------------|
| 6.40E-65 | 0.853325507 | 0.459 | 0.294 | 1.19E-60 | 10 | SENP6       |
| 1.58E-64 | 0.949837449 | 0.41  | 0.223 | 2.95E-60 | 10 | MRNIP       |
| 2.02E-64 | 0.894451383 | 0.418 | 0.24  | 3.77E-60 | 10 | BICD1       |
| 2.10E-64 | 0.836797564 | 0.362 | 0.18  | 3.91E-60 | 10 | ANKRD36B    |
| 1.12E-63 | 0.86678154  | 0.314 | 0.114 | 2.09E-59 | 10 | ZNF439      |
| 9.93E-63 | 0.887597806 | 0.479 | 0.325 | 1.85E-58 | 10 | SECISBP2    |
| 1.23E-62 | 0.882767359 | 0.527 | 0.383 | 2.29E-58 | 10 | LUC7L2      |
| 2.44E-62 | 0.837019927 | 0.51  | 0.379 | 4.54E-58 | 10 | HECTD1      |
| 1.08E-61 | 0.878357154 | 0.351 | 0.152 | 2.02E-57 | 10 | ANKRD36C    |
| 2.71E-61 | 1.123329585 | 0.408 | 0.233 | 5.05E-57 | 10 | LINC02397   |
| 2.96E-61 | 0.790755478 | 0.322 | 0.152 | 5.53E-57 | 10 | NPIP5       |
| 2.23E-60 | 0.880853315 | 0.441 | 0.265 | 4.16E-56 | 10 | DMXL1       |
| 2.65E-60 | 0.884555657 | 0.543 | 0.431 | 4.95E-56 | 10 | PPM1K       |
| 5.16E-60 | 0.964680199 | 0.396 | 0.191 | 9.63E-56 | 10 | AC012368.1  |
| 6.85E-60 | 0.892855461 | 0.543 | 0.435 | 1.28E-55 | 10 | CFLAR       |
| 1.53E-59 | 0.883534145 | 0.357 | 0.151 | 2.85E-55 | 10 | MBD5        |
| 1.79E-59 | 0.884954856 | 0.347 | 0.157 | 3.34E-55 | 10 | PMS1        |
| 2.52E-59 | 0.779262184 | 0.391 | 0.203 | 4.71E-55 | 10 | KDM6A       |
| 2.62E-59 | 0.991072435 | 0.41  | 0.236 | 4.88E-55 | 10 | CLEC2D      |
| 3.68E-59 | 0.877764794 | 0.344 | 0.152 | 6.86E-55 | 10 | SUGP2       |
| 3.97E-59 | 0.901931083 | 0.493 | 0.351 | 7.41E-55 | 10 | MORC3       |
| 4.13E-59 | 0.875595994 | 0.449 | 0.286 | 7.70E-55 | 10 | ZMYM2       |
| 6.25E-59 | 0.802655025 | 0.353 | 0.169 | 1.17E-54 | 10 | FNDC3A      |
| 8.74E-59 | 0.78439324  | 0.399 | 0.227 | 1.63E-54 | 10 | VTI1A       |
| 1.12E-58 | 0.826854672 | 0.369 | 0.205 | 2.08E-54 | 10 | KHDC4       |
| 5.98E-58 | 0.867912003 | 0.481 | 0.341 | 1.11E-53 | 10 | ZNF644      |
| 6.40E-58 | 0.848832434 | 0.42  | 0.259 | 1.19E-53 | 10 | RBM5        |
| 1.56E-57 | 0.797411578 | 0.469 | 0.337 | 2.90E-53 | 10 | SCAF4       |
| 7.14E-56 | 0.763926469 | 0.283 | 0.109 | 1.33E-51 | 10 | GMDS-DT     |
| 8.41E-56 | 0.886476012 | 0.543 | 0.42  | 1.57E-51 | 10 | TNFAIP8     |
| 9.06E-56 | 0.998979666 | 0.425 | 0.248 | 1.69E-51 | 10 | LYST        |
| 1.20E-55 | 0.824195238 | 0.42  | 0.252 | 2.25E-51 | 10 | LRBA        |
| 2.22E-55 | 0.871480579 | 0.499 | 0.371 | 4.14E-51 | 10 | SETX        |
| 4.85E-55 | 0.865127649 | 0.47  | 0.322 | 9.04E-51 | 10 | LNPEP       |
| 7.14E-55 | 0.826819597 | 0.419 | 0.257 | 1.33E-50 | 10 | PKN2        |
| 1.98E-54 | 0.794268851 | 0.327 | 0.161 | 3.69E-50 | 10 | IL6ST       |
| 2.85E-54 | 0.852442514 | 0.485 | 0.349 | 5.32E-50 | 10 | ELMO1       |
| 4.41E-54 | 0.625765778 | 0.2   | 0.052 | 8.23E-50 | 10 | RBMS3       |
| 4.66E-54 | 0.886051724 | 0.38  | 0.214 | 8.68E-50 | 10 | ARRDC3      |
| 4.72E-54 | 0.910306704 | 0.337 | 0.16  | 8.80E-50 | 10 | KSR2        |
| 7.95E-54 | 0.861277179 | 0.442 | 0.285 | 1.48E-49 | 10 | BRWD1       |
| 1.93E-53 | 0.769239923 | 0.399 | 0.253 | 3.60E-49 | 10 | TRPM7       |
| 1.61E-52 | 0.88503277  | 0.431 | 0.253 | 2.99E-48 | 10 | PHKB        |
| 1.97E-52 | 0.85256969  | 0.366 | 0.235 | 3.68E-48 | 10 | RASGRP3     |
| 1.99E-52 | 0.811666356 | 0.343 | 0.16  | 3.71E-48 | 10 | ANKRD36     |
| 2.14E-52 | 0.736984283 | 0.276 | 0.128 | 3.99E-48 | 10 | SLC16A1-AS1 |



|          |             |       |       |          |    |           |
|----------|-------------|-------|-------|----------|----|-----------|
| 3.24E-52 | 0.841963632 | 0.392 | 0.222 | 6.04E-48 | 10 | DGKD      |
| 3.34E-52 | 0.765582561 | 0.438 | 0.306 | 6.22E-48 | 10 | CNST      |
| 4.46E-52 | 0.766547812 | 0.256 | 0.095 | 8.31E-48 | 10 | UBR5-AS1  |
| 6.14E-52 | 0.73130139  | 0.544 | 0.444 | 1.14E-47 | 10 | ZEB2      |
| 7.10E-52 | 0.826015964 | 0.437 | 0.3   | 1.32E-47 | 10 | NSD1      |
| 1.07E-51 | 0.817418934 | 0.306 | 0.133 | 2.00E-47 | 10 | KDM5D     |
| 1.52E-51 | 0.616263749 | 0.156 | 0.023 | 2.83E-47 | 10 | C1orf220  |
| 2.51E-51 | 0.74440394  | 0.291 | 0.127 | 4.67E-47 | 10 | ATP8A1    |
| 3.31E-51 | 0.773548692 | 0.469 | 0.361 | 6.17E-47 | 10 | TBC1D22A  |
| 3.74E-51 | 0.783004555 | 0.307 | 0.149 | 6.98E-47 | 10 | C11orf80  |
| 4.01E-51 | 0.76751783  | 0.307 | 0.143 | 7.47E-47 | 10 | HERC4     |
| 5.20E-51 | 0.77335208  | 0.356 | 0.196 | 9.69E-47 | 10 | YTHDC2    |
| 6.15E-51 | 0.809988201 | 0.356 | 0.186 | 1.15E-46 | 10 | DCLK2     |
| 6.57E-51 | 0.750347165 | 0.324 | 0.171 | 1.22E-46 | 10 | PIIP5K2   |
| 6.73E-51 | 0.778023721 | 0.42  | 0.3   | 1.26E-46 | 10 | SFMBT1    |
| 7.09E-51 | 0.803454174 | 0.463 | 0.334 | 1.32E-46 | 10 | Mar-06    |
| 8.51E-51 | 0.785720352 | 0.46  | 0.348 | 1.59E-46 | 10 | USP3      |
| 1.52E-50 | 0.804437935 | 0.489 | 0.387 | 2.83E-46 | 10 | DOCK8     |
| 1.56E-50 | 0.798391175 | 0.438 | 0.311 | 2.92E-46 | 10 | MARF1     |
| 3.86E-50 | 0.814314558 | 0.383 | 0.234 | 7.20E-46 | 10 | ZNF506    |
| 6.32E-50 | 0.767882591 | 0.405 | 0.268 | 1.18E-45 | 10 | AP1G1     |
| 8.26E-50 | 0.810238751 | 0.412 | 0.257 | 1.54E-45 | 10 | PRKCE     |
| 9.08E-50 | 0.750386373 | 0.402 | 0.275 | 1.69E-45 | 10 | RERE      |
| 1.25E-49 | 0.713583848 | 0.263 | 0.105 | 2.33E-45 | 10 | USP45     |
| 2.29E-49 | 0.799797125 | 0.455 | 0.316 | 4.28E-45 | 10 | BTAF1     |
| 5.56E-49 | 0.702062679 | 0.276 | 0.111 | 1.04E-44 | 10 | CCDC84    |
| 1.07E-48 | 0.700504053 | 0.287 | 0.117 | 2.00E-44 | 10 | ZBED6     |
| 1.71E-48 | 0.781555955 | 0.355 | 0.193 | 3.18E-44 | 10 | TCF12     |
| 1.72E-48 | 0.69726179  | 0.236 | 0.078 | 3.21E-44 | 10 | ARL15     |
| 7.27E-48 | 0.801888739 | 0.427 | 0.295 | 1.35E-43 | 10 | LUC7L     |
| 1.84E-47 | 0.824535937 | 0.452 | 0.318 | 3.42E-43 | 10 | ZNF638    |
| 6.29E-47 | 0.889940669 | 0.418 | 0.25  | 1.17E-42 | 10 | RABEP2    |
| 6.90E-47 | 0.759274727 | 0.33  | 0.174 | 1.29E-42 | 10 | NHLRC3    |
| 1.45E-46 | 0.857615376 | 0.459 | 0.322 | 2.71E-42 | 10 | DGKA      |
| 2.29E-46 | 0.761672114 | 0.336 | 0.178 | 4.27E-42 | 10 | EZH1      |
| 2.93E-46 | 0.695756315 | 0.305 | 0.166 | 5.47E-42 | 10 | ATP9B     |
| 3.25E-46 | 0.876705693 | 0.504 | 0.388 | 6.06E-42 | 10 | CLINT1    |
| 4.01E-46 | 0.676839655 | 0.264 | 0.121 | 7.47E-42 | 10 | LIMD1     |
| 5.98E-46 | 0.822668385 | 0.413 | 0.264 | 1.12E-41 | 10 | SFSWAP    |
| 8.73E-46 | 0.815809101 | 0.312 | 0.156 | 1.63E-41 | 10 | SESTD1    |
| 1.50E-45 | 0.75743686  | 0.247 | 0.094 | 2.79E-41 | 10 | LINC02363 |
| 1.51E-45 | 0.73086779  | 0.335 | 0.187 | 2.82E-41 | 10 | ADAM10    |
| 2.18E-45 | 0.678815203 | 0.323 | 0.193 | 4.07E-41 | 10 | GSK3B     |
| 6.19E-45 | 0.748129695 | 0.342 | 0.191 | 1.15E-40 | 10 | ATAD2B    |
| 8.52E-45 | 0.75879591  | 0.4   | 0.274 | 1.59E-40 | 10 | VPS36     |
| 8.91E-45 | 0.782900349 | 0.416 | 0.27  | 1.66E-40 | 10 | MEF2A     |

|          |             |       |       |          |    |           |
|----------|-------------|-------|-------|----------|----|-----------|
| 9.63E-45 | 0.835816745 | 0.383 | 0.223 | 1.80E-40 | 10 | SMC6      |
| 2.09E-44 | 0.752336223 | 0.329 | 0.181 | 3.89E-40 | 10 | SP4       |
| 2.47E-44 | 0.778797814 | 0.363 | 0.214 | 4.60E-40 | 10 | UBR2      |
| 3.25E-44 | 0.687433526 | 0.3   | 0.162 | 6.06E-40 | 10 | ZDHHC20   |
| 3.42E-44 | 0.78148508  | 0.445 | 0.338 | 6.38E-40 | 10 | CCDC50    |
| 3.56E-44 | 0.706585271 | 0.29  | 0.134 | 6.64E-40 | 10 | ZNF736    |
| 6.69E-44 | 0.774904249 | 0.461 | 0.345 | 1.25E-39 | 10 | LEF1      |
| 1.94E-43 | 0.729867091 | 0.383 | 0.264 | 3.61E-39 | 10 | HERC1     |
| 4.04E-43 | 0.617703148 | 0.235 | 0.097 | 7.53E-39 | 10 | ANAPC4    |
| 8.55E-43 | 0.765748591 | 0.437 | 0.328 | 1.59E-38 | 10 | PTBP3     |
| 4.62E-42 | 0.72447015  | 0.247 | 0.099 | 8.61E-38 | 10 | L3MBTL3   |
| 5.56E-42 | 0.547336499 | 0.193 | 0.074 | 1.04E-37 | 10 | AUH       |
| 5.80E-42 | 0.826057516 | 0.443 | 0.315 | 1.08E-37 | 10 | MZB1      |
| 1.20E-41 | 0.760522342 | 0.365 | 0.234 | 2.24E-37 | 10 | LONP2     |
| 1.31E-41 | 0.743985618 | 0.445 | 0.344 | 2.45E-37 | 10 | PCF11     |
| 2.04E-41 | 0.743162992 | 0.367 | 0.223 | 3.80E-37 | 10 | TENT2     |
| 2.78E-41 | 0.544851245 | 0.187 | 0.068 | 5.18E-37 | 10 | EFCAB13   |
| 3.46E-41 | 0.831052978 | 0.377 | 0.241 | 6.45E-37 | 10 | YIPF4     |
| 4.11E-41 | 0.661450734 | 0.259 | 0.117 | 7.67E-37 | 10 | DLEU2     |
| 4.32E-41 | 0.67128232  | 0.266 | 0.127 | 8.06E-37 | 10 | PBX3      |
| 9.35E-41 | 0.735494858 | 0.343 | 0.202 | 1.74E-36 | 10 | SPG11     |
| 1.63E-40 | 0.668587017 | 0.279 | 0.129 | 3.04E-36 | 10 | MED23     |
| 2.76E-40 | 0.773803436 | 0.364 | 0.234 | 5.15E-36 | 10 | XPO1      |
| 7.74E-40 | 0.667965289 | 0.289 | 0.157 | 1.44E-35 | 10 | SYNE1     |
| 2.47E-39 | 0.757131368 | 0.333 | 0.201 | 4.60E-35 | 10 | DICER1    |
| 3.92E-39 | 0.494194749 | 0.148 | 0.034 | 7.31E-35 | 10 | LINC00278 |
| 5.76E-39 | 0.677013669 | 0.3   | 0.18  | 1.07E-34 | 10 | KIAA1109  |
| 6.26E-39 | 0.651724565 | 0.233 | 0.107 | 1.17E-34 | 10 | NLRC3     |
| 6.34E-39 | 0.788207773 | 0.386 | 0.238 | 1.18E-34 | 10 | GMDS      |
| 1.25E-38 | 0.695800592 | 0.365 | 0.237 | 2.33E-34 | 10 | CEMP2     |
| 1.58E-38 | 0.718459023 | 0.384 | 0.262 | 2.95E-34 | 10 | ITCH      |
| 1.77E-38 | 0.727785521 | 0.387 | 0.286 | 3.31E-34 | 10 | ERICH1    |
| 2.37E-38 | 0.76122851  | 0.422 | 0.307 | 4.42E-34 | 10 | GPCPD1    |
| 4.28E-38 | 0.704092632 | 0.262 | 0.116 | 7.97E-34 | 10 | PPP1R3E   |
| 4.80E-38 | 0.560246386 | 0.192 | 0.074 | 8.95E-34 | 10 | ZNF507    |
| 6.16E-38 | 0.808503755 | 0.439 | 0.332 | 1.15E-33 | 10 | TRIM38    |
| 6.85E-38 | 0.676807224 | 0.21  | 0.083 | 1.28E-33 | 10 | SGSM1     |
| 8.47E-38 | 0.806782429 | 0.427 | 0.316 | 1.58E-33 | 10 | WASHC4    |
| 1.06E-37 | 0.736179855 | 0.371 | 0.238 | 1.97E-33 | 10 | KDM4C     |
| 1.31E-37 | 0.707764295 | 0.343 | 0.223 | 2.44E-33 | 10 | ERBIN     |
| 1.83E-37 | 0.704570648 | 0.317 | 0.189 | 3.42E-33 | 10 | CD200     |
| 2.38E-37 | 0.733506052 | 0.319 | 0.192 | 4.44E-33 | 10 | ARHGAP5   |
| 3.36E-37 | 0.702411703 | 0.258 | 0.117 | 6.26E-33 | 10 | SESN1     |
| 7.37E-37 | 0.649171009 | 0.303 | 0.196 | 1.37E-32 | 10 | CEP85L    |
| 9.30E-37 | 0.735297704 | 0.418 | 0.314 | 1.73E-32 | 10 | AP3B1     |
| 1.10E-36 | 0.669131923 | 0.258 | 0.115 | 2.05E-32 | 10 | ANKAR     |

|          |             |       |       |          |    |              |
|----------|-------------|-------|-------|----------|----|--------------|
| 1.31E-36 | 0.503605288 | 0.169 | 0.064 | 2.45E-32 | 10 | TMEM161B-AS1 |
| 1.82E-36 | 0.724296757 | 0.386 | 0.279 | 3.39E-32 | 10 | CAPRIN1      |
| 1.94E-36 | 0.553444556 | 0.178 | 0.063 | 3.61E-32 | 10 | AL669831.5   |
| 1.99E-36 | 0.624090798 | 0.269 | 0.156 | 3.72E-32 | 10 | NCOA2        |
| 2.34E-36 | 0.659961133 | 0.267 | 0.137 | 4.36E-32 | 10 | RHBDD1       |
| 2.48E-36 | 0.727730854 | 0.408 | 0.293 | 4.63E-32 | 10 | ZFC3H1       |
| 2.63E-36 | 0.765409546 | 0.252 | 0.135 | 4.91E-32 | 10 | KLF8         |
| 2.65E-36 | 0.531513516 | 0.193 | 0.08  | 4.94E-32 | 10 | TTC21B       |
| 2.69E-36 | 0.717917342 | 0.333 | 0.199 | 5.01E-32 | 10 | UHRF2        |
| 4.70E-36 | 0.672085133 | 0.296 | 0.158 | 8.77E-32 | 10 | FAM172A      |
| 7.56E-36 | 0.704389686 | 0.367 | 0.262 | 1.41E-31 | 10 | UBR5         |
| 8.96E-36 | 0.691713978 | 0.31  | 0.192 | 1.67E-31 | 10 | JPX          |
| 1.18E-35 | 0.543737453 | 0.187 | 0.074 | 2.20E-31 | 10 | DPH6         |
| 1.75E-35 | 0.70206034  | 0.352 | 0.245 | 3.26E-31 | 10 | CUL5         |
| 1.93E-35 | 0.465946746 | 0.136 | 0.032 | 3.59E-31 | 10 | GRAMD1B      |
| 1.99E-35 | 0.675123901 | 0.281 | 0.145 | 3.70E-31 | 10 | NBPF11       |
| 2.32E-35 | 0.640016463 | 0.324 | 0.219 | 4.33E-31 | 10 | WDR43        |
| 3.36E-35 | 0.825167372 | 0.409 | 0.278 | 6.26E-31 | 10 | SPG7         |
| 3.84E-35 | 0.725985979 | 0.287 | 0.148 | 7.16E-31 | 10 | SHPRH        |
| 3.95E-35 | 0.707458663 | 0.329 | 0.209 | 7.37E-31 | 10 | MKLN1        |
| 4.04E-35 | 0.629658697 | 0.238 | 0.096 | 7.53E-31 | 10 | NIPAL2       |
| 4.94E-35 | 0.596923335 | 0.202 | 0.079 | 9.21E-31 | 10 | NEK3         |
| 5.16E-35 | 0.621049795 | 0.147 | 0.03  | 9.62E-31 | 10 | PXDNL        |
| 6.90E-35 | 0.722424097 | 0.345 | 0.229 | 1.29E-30 | 10 | VRK2         |
| 9.45E-35 | 0.575445401 | 0.212 | 0.089 | 1.76E-30 | 10 | TRMT11       |
| 1.06E-34 | 0.658574228 | 0.273 | 0.144 | 1.98E-30 | 10 | MYSM1        |
| 1.13E-34 | 0.695684517 | 0.288 | 0.163 | 2.11E-30 | 10 | HEATR5B      |
| 1.97E-34 | 0.721001664 | 0.297 | 0.167 | 3.68E-30 | 10 | AC007569.1   |
| 2.08E-34 | 0.501368897 | 0.161 | 0.055 | 3.88E-30 | 10 | PIGL         |
| 2.23E-34 | 0.814188012 | 0.362 | 0.228 | 4.16E-30 | 10 | ITPR1        |
| 2.78E-34 | 0.751210904 | 0.429 | 0.323 | 5.19E-30 | 10 | MIS18BP1     |
| 2.80E-34 | 0.742632402 | 0.386 | 0.264 | 5.22E-30 | 10 | USP48        |
| 2.87E-34 | 0.674155599 | 0.308 | 0.198 | 5.35E-30 | 10 | NCOA7        |
| 3.75E-34 | 0.57104996  | 0.21  | 0.098 | 7.00E-30 | 10 | NHLRC2       |
| 3.89E-34 | 0.535474479 | 0.19  | 0.083 | 7.26E-30 | 10 | FAM98B       |
| 4.10E-34 | 0.697019855 | 0.35  | 0.249 | 7.64E-30 | 10 | ATXN1        |
| 4.88E-34 | 0.61156862  | 0.203 | 0.081 | 9.11E-30 | 10 | AC093010.2   |
| 6.22E-34 | 0.57431617  | 0.22  | 0.105 | 1.16E-29 | 10 | HS2ST1       |
| 6.66E-34 | 0.639958015 | 0.287 | 0.18  | 1.24E-29 | 10 | AGTPBP1      |
| 3.69E-33 | 0.653859902 | 0.263 | 0.135 | 6.89E-29 | 10 | PTAR1        |
| 3.91E-33 | 0.687681241 | 0.275 | 0.154 | 7.28E-29 | 10 | TMEM63A      |
| 4.10E-33 | 0.606129934 | 0.234 | 0.105 | 7.64E-29 | 10 | UNKL         |
| 4.57E-33 | 0.481057174 | 0.151 | 0.047 | 8.53E-29 | 10 | GCNT2        |
| 4.82E-33 | 0.804456053 | 0.272 | 0.132 | 8.99E-29 | 10 | KLHL14       |
| 5.64E-33 | 0.707966803 | 0.371 | 0.244 | 1.05E-28 | 10 | ETNK1        |
| 8.96E-33 | 1.00665973  | 0.238 | 0.102 | 1.67E-28 | 10 | FCRL2        |

|          |             |       |       |          |    |            |
|----------|-------------|-------|-------|----------|----|------------|
| 1.24E-32 | 0.746763356 | 0.363 | 0.237 | 2.32E-28 | 10 | PUM2       |
| 1.58E-32 | 0.628780288 | 0.188 | 0.076 | 2.95E-28 | 10 | PDGFD      |
| 1.62E-32 | 0.724796565 | 0.415 | 0.304 | 3.03E-28 | 10 | FBXW11     |
| 1.67E-32 | 0.724549247 | 0.337 | 0.204 | 3.12E-28 | 10 | FRY        |
| 2.00E-32 | 0.689470215 | 0.317 | 0.208 | 3.72E-28 | 10 | RICTOR     |
| 2.34E-32 | 0.682809904 | 0.269 | 0.135 | 4.37E-28 | 10 | TBCK       |
| 2.49E-32 | 0.680975986 | 0.319 | 0.19  | 4.65E-28 | 10 | ADAM17     |
| 2.65E-32 | 0.606358467 | 0.211 | 0.091 | 4.94E-28 | 10 | AL662796.1 |
| 3.63E-32 | 0.737381972 | 0.391 | 0.281 | 6.77E-28 | 10 | DNAJB14    |
| 3.67E-32 | 0.657906901 | 0.262 | 0.143 | 6.84E-28 | 10 | ZNF83      |
| 4.70E-32 | 0.616416151 | 0.208 | 0.092 | 8.77E-28 | 10 | ZFP14      |
| 5.76E-32 | 0.675262244 | 0.331 | 0.213 | 1.07E-27 | 10 | ITFG1      |
| 6.09E-32 | 0.720101038 | 0.377 | 0.267 | 1.14E-27 | 10 | ANKRD10    |
| 6.71E-32 | 0.625631907 | 0.259 | 0.14  | 1.25E-27 | 10 | MFN1       |
| 9.19E-32 | 0.670164535 | 0.305 | 0.204 | 1.71E-27 | 10 | INO80D     |
| 1.63E-31 | 0.692459733 | 0.432 | 0.331 | 3.05E-27 | 10 | SPTBN1     |
| 2.66E-31 | 0.583275445 | 0.251 | 0.136 | 4.97E-27 | 10 | ATG14      |
| 3.81E-31 | 0.536243989 | 0.188 | 0.079 | 7.09E-27 | 10 | TMEM117    |
| 4.20E-31 | 0.672228877 | 0.276 | 0.144 | 7.83E-27 | 10 | DDX39B     |
| 5.11E-31 | 0.647688425 | 0.294 | 0.179 | 9.53E-27 | 10 | VPS13D     |
| 8.37E-31 | 0.721556395 | 0.386 | 0.279 | 1.56E-26 | 10 | FAM208A    |
| 9.98E-31 | 0.677678492 | 0.26  | 0.139 | 1.86E-26 | 10 | POU2F1     |
| 1.25E-30 | 0.602627755 | 0.244 | 0.124 | 2.34E-26 | 10 | TMEM41B    |
| 1.33E-30 | 0.718123152 | 0.359 | 0.238 | 2.49E-26 | 10 | MAP4K5     |
| 1.54E-30 | 0.609496892 | 0.265 | 0.153 | 2.86E-26 | 10 | ASCC3      |
| 2.50E-30 | 0.51486537  | 0.169 | 0.064 | 4.66E-26 | 10 | CARF       |
| 2.51E-30 | 0.690742122 | 0.275 | 0.15  | 4.69E-26 | 10 | PHF21A     |
| 3.78E-30 | 0.62201245  | 0.234 | 0.119 | 7.04E-26 | 10 | S100BPB    |
| 8.82E-30 | 0.635395668 | 0.285 | 0.172 | 1.64E-25 | 10 | CLASP2     |
| 8.89E-30 | 0.64448401  | 0.249 | 0.119 | 1.66E-25 | 10 | CARMIL1    |
| 1.12E-29 | 0.635999568 | 0.248 | 0.12  | 2.09E-25 | 10 | SENP7      |
| 1.25E-29 | 0.53052115  | 0.195 | 0.076 | 2.33E-25 | 10 | ASB3       |
| 1.65E-29 | 0.685615314 | 0.29  | 0.165 | 3.08E-25 | 10 | RCOR3      |
| 1.87E-29 | 0.626109549 | 0.281 | 0.181 | 3.49E-25 | 10 | SNX14      |
| 2.37E-29 | 0.670449532 | 0.306 | 0.205 | 4.43E-25 | 10 | CCDC6      |
| 4.04E-29 | 0.575264966 | 0.21  | 0.107 | 7.54E-25 | 10 | VPS8       |
| 4.28E-29 | 0.747211608 | 0.361 | 0.258 | 7.98E-25 | 10 | GLS        |
| 8.46E-29 | 0.527237718 | 0.184 | 0.077 | 1.58E-24 | 10 | ZNF718     |
| 9.32E-29 | 0.587757032 | 0.266 | 0.154 | 1.74E-24 | 10 | CTDSPL2    |
| 1.32E-28 | 0.61436335  | 0.277 | 0.176 | 2.45E-24 | 10 | ARHGEF7    |
| 1.52E-28 | 1.040975646 | 0.327 | 0.184 | 2.84E-24 | 10 | SFTPB      |
| 2.14E-28 | 0.639391921 | 0.304 | 0.188 | 3.99E-24 | 10 | CAPN7      |
| 2.41E-28 | 0.56461779  | 0.182 | 0.071 | 4.49E-24 | 10 | PEX1       |
| 3.59E-28 | 0.64673237  | 0.271 | 0.152 | 6.70E-24 | 10 | ANKZF1     |
| 4.69E-28 | 0.665045914 | 0.333 | 0.227 | 8.74E-24 | 10 | PSMA3-AS1  |
| 5.60E-28 | 0.627334899 | 0.273 | 0.149 | 1.04E-23 | 10 | ARHGAP12   |

|          |             |       |       |          |    |            |
|----------|-------------|-------|-------|----------|----|------------|
| 5.85E-28 | 0.797444935 | 0.383 | 0.265 | 1.09E-23 | 10 | ARHGEF3    |
| 6.23E-28 | 0.611922845 | 0.234 | 0.126 | 1.16E-23 | 10 | PIAS2      |
| 8.81E-28 | 0.70335926  | 0.257 | 0.12  | 1.64E-23 | 10 | ZMAT1      |
| 1.08E-27 | 0.619062856 | 0.247 | 0.136 | 2.01E-23 | 10 | ALDH5A1    |
| 1.17E-27 | 0.561283712 | 0.204 | 0.086 | 2.18E-23 | 10 | MTMR4      |
| 1.29E-27 | 0.5542139   | 0.212 | 0.101 | 2.41E-23 | 10 | SLC25A16   |
| 1.30E-27 | 0.594034742 | 0.258 | 0.144 | 2.42E-23 | 10 | TNKS       |
| 1.59E-27 | 0.523065649 | 0.178 | 0.071 | 2.96E-23 | 10 | ZNF407     |
| 1.87E-27 | 0.662952274 | 0.291 | 0.167 | 3.49E-23 | 10 | ZNF493     |
| 2.44E-27 | 0.700651396 | 0.376 | 0.275 | 4.55E-23 | 10 | CASP8      |
| 4.05E-27 | 0.695570485 | 0.34  | 0.222 | 7.55E-23 | 10 | NLRP1      |
| 4.48E-27 | 0.549788736 | 0.209 | 0.101 | 8.36E-23 | 10 | TPK1       |
| 5.57E-27 | 0.736065319 | 0.397 | 0.293 | 1.04E-22 | 10 | ADD3       |
| 5.90E-27 | 0.728460958 | 0.301 | 0.189 | 1.10E-22 | 10 | ATG16L2    |
| 6.68E-27 | 0.575016108 | 0.235 | 0.126 | 1.25E-22 | 10 | FAM91A1    |
| 9.62E-27 | 0.729227846 | 0.34  | 0.229 | 1.79E-22 | 10 | CRYBG1     |
| 1.47E-26 | 0.475790043 | 0.164 | 0.061 | 2.74E-22 | 10 | WNT16      |
| 1.50E-26 | 0.628061499 | 0.31  | 0.207 | 2.80E-22 | 10 | DYM        |
| 1.60E-26 | 0.527407047 | 0.202 | 0.098 | 2.98E-22 | 10 | VPS13A     |
| 1.64E-26 | 0.644327455 | 0.312 | 0.197 | 3.07E-22 | 10 | TGFBR3     |
| 1.92E-26 | 0.610735286 | 0.242 | 0.115 | 3.58E-22 | 10 | SNX13      |
| 1.95E-26 | 0.649795378 | 0.278 | 0.155 | 3.64E-22 | 10 | MTR        |
| 4.24E-26 | 0.559197709 | 0.226 | 0.12  | 7.90E-22 | 10 | NBAS       |
| 4.95E-26 | 0.635313386 | 0.297 | 0.192 | 9.22E-22 | 10 | KRIT1      |
| 5.36E-26 | 0.666244692 | 0.295 | 0.186 | 1.00E-21 | 10 | ENTPD4     |
| 5.78E-26 | 0.500150448 | 0.174 | 0.067 | 1.08E-21 | 10 | FANCL      |
| 6.28E-26 | 0.631517398 | 0.246 | 0.128 | 1.17E-21 | 10 | RFX3       |
| 7.70E-26 | 0.591467469 | 0.171 | 0.069 | 1.43E-21 | 10 | ZNF860     |
| 7.90E-26 | 0.541867584 | 0.196 | 0.09  | 1.47E-21 | 10 | AP001636.3 |
| 1.01E-25 | 0.719346418 | 0.22  | 0.109 | 1.89E-21 | 10 | TSHZ2      |
| 1.41E-25 | 0.66146763  | 0.303 | 0.181 | 2.62E-21 | 10 | ZMYND8     |
| 1.56E-25 | 0.7523158   | 0.278 | 0.167 | 2.91E-21 | 10 | FCRL1      |
| 1.57E-25 | 0.692380658 | 0.293 | 0.17  | 2.92E-21 | 10 | GPM6A      |
| 1.68E-25 | 0.609326705 | 0.293 | 0.188 | 3.14E-21 | 10 | TPP2       |
| 2.51E-25 | 0.760743913 | 0.319 | 0.198 | 4.69E-21 | 10 | ENTPD1     |
| 2.61E-25 | 0.576414887 | 0.25  | 0.145 | 4.86E-21 | 10 | NAA16      |
| 3.76E-25 | 0.788517961 | 0.383 | 0.269 | 7.01E-21 | 10 | RNASEH2B   |
| 5.86E-25 | 0.663541038 | 0.248 | 0.127 | 1.09E-20 | 10 | SLC39A10   |
| 7.76E-25 | 0.645108909 | 0.308 | 0.194 | 1.45E-20 | 10 | MTG1       |
| 1.02E-24 | 0.49132542  | 0.162 | 0.059 | 1.91E-20 | 10 | PRH1       |
| 1.80E-24 | 0.544740135 | 0.196 | 0.087 | 3.36E-20 | 10 | SLC16A7    |
| 2.52E-24 | 0.65227883  | 0.309 | 0.208 | 4.69E-20 | 10 | RAB3GAP2   |
| 2.78E-24 | 0.555583912 | 0.196 | 0.085 | 5.17E-20 | 10 | POLG2      |
| 3.08E-24 | 0.565312119 | 0.228 | 0.117 | 5.74E-20 | 10 | THADA      |
| 3.12E-24 | 0.528958037 | 0.208 | 0.101 | 5.82E-20 | 10 | MAP3K4     |
| 7.97E-24 | 0.674501957 | 0.29  | 0.164 | 1.49E-19 | 10 | DIP2A      |

|             |             |       |       |             |    |            |
|-------------|-------------|-------|-------|-------------|----|------------|
| 6.29E-23    | 0.628993158 | 0.256 | 0.152 | 1.17E-18    | 10 | IKBKB      |
| 9.64E-23    | 0.686443564 | 0.323 | 0.217 | 1.80E-18    | 10 | POLK       |
| 9.88E-23    | 0.601699102 | 0.246 | 0.138 | 1.84E-18    | 10 | CTC1       |
| 3.15E-21    | 0.538471261 | 0.203 | 0.103 | 5.87E-17    | 10 | TUBGCP3    |
| 5.13E-21    | 0.59356263  | 0.258 | 0.157 | 9.55E-17    | 10 | KIAA1468   |
| 7.30E-21    | 0.553472135 | 0.214 | 0.105 | 1.36E-16    | 10 | TEP1       |
| 1.96E-19    | 0.62751572  | 0.304 | 0.201 | 3.65E-15    | 10 | NUP107     |
| 4.98E-19    | 0.551582532 | 0.194 | 0.084 | 9.28E-15    | 10 | TMEM168    |
| 7.89E-19    | 0.478714298 | 0.356 | 0.244 | 1.47E-14    | 10 | AC007952.4 |
| 1.80E-11    | 0.392357362 | 0.649 | 0.764 | 3.35E-07    | 10 | EIF4G2     |
| 4.25E-11    | 0.33170189  | 0.636 | 0.744 | 7.92E-07    | 10 | MORF4L1    |
| 1.71E-06    | 0.262596333 | 0.264 | 0.38  | 0.031890442 | 10 | DBNL       |
| 0.000257716 | 0.327081809 | 0.555 | 0.686 | 1           | 10 | SEC62      |
| 0.000568369 | 0.373803789 | 0.554 | 0.671 | 1           | 10 | Sep-06     |
| 0.003902834 | 0.264388073 | 0.284 | 0.417 | 1           | 10 | FBXO7      |
| 0.009179654 | 0.266371842 | 0.324 | 0.445 | 1           | 10 | STAT6      |
| 0           | 3.050406937 | 0.998 | 0.54  | 0           | 11 | FOS        |
| 0           | 2.996633528 | 0.803 | 0.13  | 0           | 11 | ATF3       |
| 0           | 2.71371127  | 1     | 0.714 | 0           | 11 | DUSP1      |
| 0           | 2.683368188 | 0.998 | 0.665 | 0           | 11 | CD69       |
| 0           | 2.600467588 | 0.986 | 0.283 | 0           | 11 | DNAJB1     |
| 0           | 2.595925063 | 0.988 | 0.529 | 0           | 11 | DUSP2      |
| 0           | 2.45139147  | 0.939 | 0.345 | 0           | 11 | GADD45B    |
| 0           | 2.42153934  | 0.984 | 0.201 | 0           | 11 | EGR1       |
| 0           | 2.41446588  | 0.994 | 0.376 | 0           | 11 | NR4A1      |
| 0           | 2.356079729 | 0.755 | 0.04  | 0           | 11 | HES1       |
| 0           | 2.334127074 | 0.99  | 0.62  | 0           | 11 | PMAIP1     |
| 0           | 2.307580188 | 1     | 0.526 | 0           | 11 | FOSB       |
| 0           | 2.285964096 | 0.999 | 0.668 | 0           | 11 | CD83       |
| 0           | 2.260755144 | 0.919 | 0.165 | 0           | 11 | KLF4       |
| 0           | 2.254638205 | 0.993 | 0.661 | 0           | 11 | NFKBIA     |
| 0           | 2.231867029 | 0.998 | 0.841 | 0           | 11 | HSP90AA1   |
| 0           | 2.052613316 | 0.994 | 0.547 | 0           | 11 | DNAJA1     |
| 0           | 2.022719899 | 0.994 | 0.505 | 0           | 11 | NR4A2      |
| 0           | 2.020977072 | 0.983 | 0.559 | 0           | 11 | IRF1       |
| 0           | 1.985924094 | 0.993 | 0.589 | 0           | 11 | IER2       |
| 0           | 1.9442259   | 0.958 | 0.336 | 0           | 11 | DDIT3      |
| 0           | 1.851511078 | 0.997 | 0.672 | 0           | 11 | PPP1R15A   |
| 0           | 1.846855078 | 0.828 | 0.188 | 0           | 11 | HSPA1B     |
| 0           | 1.825851534 | 0.996 | 0.778 | 0           | 11 | HSPA8      |
| 0           | 1.733740332 | 0.999 | 0.735 | 0           | 11 | JUN        |
| 0           | 1.662280048 | 0.944 | 0.432 | 0           | 11 | RGS2       |
| 0           | 1.605714158 | 0.989 | 0.675 | 0           | 11 | BRD2       |
| 0           | 1.568760701 | 0.999 | 0.87  | 0           | 11 | HSP90AB1   |
| 0           | 1.546073138 | 0.992 | 0.775 | 0           | 11 | SQSTM1     |
| 0           | 1.542508765 | 0.972 | 0.528 | 0           | 11 | RSRC2      |

|           |             |       |       |           |    |          |
|-----------|-------------|-------|-------|-----------|----|----------|
| 0         | 1.513120122 | 0.953 | 0.477 | 0         | 11 | TUBB4B   |
| 0         | 1.490122271 | 1     | 0.841 | 0         | 11 | ZFP36    |
| 0         | 1.456670079 | 0.91  | 0.309 | 0         | 11 | HSPH1    |
| 0         | 1.369231699 | 0.981 | 0.722 | 0         | 11 | EIF4A2   |
| 0         | 1.352205533 | 0.838 | 0.254 | 0         | 11 | NEU1     |
| 0         | 1.349126242 | 0.985 | 0.648 | 0         | 11 | CCNL1    |
| 0         | 1.322822344 | 0.8   | 0.156 | 0         | 11 | UBE2S    |
| 0         | 1.310517046 | 0.971 | 0.604 | 0         | 11 | SRSF3    |
| 0         | 1.27630276  | 0.864 | 0.245 | 0         | 11 | NR4A3    |
| 0         | 1.270912071 | 0.99  | 0.754 | 0         | 11 | SRSF7    |
| 0         | 1.259373091 | 0.876 | 0.301 | 0         | 11 | RASGEF1B |
| 0         | 1.2470554   | 0.841 | 0.234 | 0         | 11 | TYROBP   |
| 0         | 1.230391308 | 0.998 | 0.849 | 0         | 11 | KLF6     |
| 0         | 1.219079972 | 0.967 | 0.627 | 0         | 11 | DDX3X    |
| 0         | 1.203547206 | 0.824 | 0.234 | 0         | 11 | ZC3H12A  |
| 0         | 1.136143965 | 0.965 | 0.642 | 0         | 11 | TRA2B    |
| 0         | 1.132732792 | 0.602 | 0.043 | 0         | 11 | RND1     |
| 0         | 1.014013598 | 0.881 | 0.332 | 0         | 11 | IFRD1    |
| 0         | 0.957443716 | 0.965 | 0.711 | 0         | 11 | EIF5     |
| 5.50E-294 | 1.079259152 | 0.973 | 0.657 | 1.03E-289 | 11 | CCR7     |
| 2.53E-291 | 1.227085622 | 0.923 | 0.441 | 4.72E-287 | 11 | CDKN1A   |
| 1.29E-287 | 1.900294679 | 0.772 | 0.268 | 2.41E-283 | 11 | RGS1     |
| 6.07E-282 | 1.747360071 | 0.69  | 0.155 | 1.13E-277 | 11 | HSPA1A   |
| 2.19E-281 | 1.010793722 | 0.961 | 0.667 | 4.09E-277 | 11 | PRDM2    |
| 2.75E-276 | 0.926389401 | 0.872 | 0.4   | 5.13E-272 | 11 | GTF2B    |
| 2.18E-275 | 0.978092931 | 0.96  | 0.621 | 4.06E-271 | 11 | HERPUD1  |
| 4.36E-275 | 1.170534126 | 0.742 | 0.225 | 8.14E-271 | 11 | PNP      |
| 7.41E-268 | 0.992204024 | 0.81  | 0.319 | 1.38E-263 | 11 | EIF4A3   |
| 4.82E-263 | 1.401745523 | 0.616 | 0.101 | 8.98E-259 | 11 | ICAM1    |
| 1.54E-262 | 0.846378091 | 0.813 | 0.326 | 2.86E-258 | 11 | ZFAND5   |
| 5.04E-260 | 0.881204543 | 0.96  | 0.741 | 9.40E-256 | 11 | ZFAS1    |
| 1.37E-258 | 0.974473566 | 0.84  | 0.326 | 2.55E-254 | 11 | PPP1R10  |
| 2.74E-258 | 0.884125906 | 0.853 | 0.346 | 5.11E-254 | 11 | HBP1     |
| 3.45E-257 | 1.010328458 | 0.876 | 0.426 | 6.43E-253 | 11 | HSPD1    |
| 6.67E-252 | 0.967306386 | 0.887 | 0.511 | 1.24E-247 | 11 | NOP58    |
| 8.75E-252 | 1.04102303  | 0.591 | 0.079 | 1.63E-247 | 11 | EGR2     |
| 2.49E-248 | 0.894546094 | 0.844 | 0.386 | 4.63E-244 | 11 | TANK     |
| 1.32E-247 | 0.99828377  | 0.998 | 0.823 | 2.47E-243 | 11 | JUNB     |
| 1.77E-247 | 0.894387455 | 0.783 | 0.277 | 3.29E-243 | 11 | TIPARP   |
| 2.83E-241 | 1.013932247 | 0.889 | 0.41  | 5.27E-237 | 11 | ZNF331   |
| 2.24E-238 | 0.832216708 | 0.623 | 0.122 | 4.18E-234 | 11 | DNAJB4   |
| 3.55E-237 | 0.920023367 | 0.952 | 0.648 | 6.61E-233 | 11 | TUBA1A   |
| 1.93E-236 | 0.819509605 | 0.747 | 0.227 | 3.61E-232 | 11 | DEDD2    |
| 1.78E-232 | 1.138798621 | 0.692 | 0.193 | 3.32E-228 | 11 | GLA      |
| 9.62E-230 | 0.945661274 | 0.878 | 0.52  | 1.79E-225 | 11 | RPL22L1  |
| 6.60E-227 | 1.445223996 | 0.608 | 0.13  | 1.23E-222 | 11 | TNF      |

|           |             |       |       |           |    |            |
|-----------|-------------|-------|-------|-----------|----|------------|
| 1.39E-225 | 0.944715866 | 0.918 | 0.547 | 2.60E-221 | 11 | ODC1       |
| 4.23E-219 | 0.935129051 | 0.771 | 0.294 | 7.88E-215 | 11 | SERTAD1    |
| 7.63E-219 | 0.803929121 | 0.762 | 0.288 | 1.42E-214 | 11 | NAMPT      |
| 5.73E-216 | 0.74141314  | 0.827 | 0.384 | 1.07E-211 | 11 | DNAJB6     |
| 4.28E-214 | 0.902527252 | 0.511 | 0.068 | 7.99E-210 | 11 | BAG3       |
| 4.45E-213 | 0.871863744 | 0.959 | 0.67  | 8.29E-209 | 11 | TUBA1B     |
| 7.28E-211 | 0.998494818 | 0.854 | 0.401 | 1.36E-206 | 11 | KLF2       |
| 1.38E-209 | 0.790257496 | 0.932 | 0.609 | 2.58E-205 | 11 | SRSF2      |
| 8.04E-207 | 0.754174267 | 0.926 | 0.597 | 1.50E-202 | 11 | PIM2       |
| 9.13E-206 | 0.815165051 | 0.513 | 0.063 | 1.70E-201 | 11 | PLK2       |
| 3.04E-203 | 0.940135239 | 0.658 | 0.182 | 5.66E-199 | 11 | DDIT4      |
| 1.24E-201 | 0.897508173 | 0.723 | 0.248 | 2.31E-197 | 11 | SNHG12     |
| 3.17E-201 | 0.932803896 | 0.637 | 0.158 | 5.91E-197 | 11 | CITED2     |
| 1.18E-200 | 0.712653954 | 0.84  | 0.397 | 2.20E-196 | 11 | SLC38A2    |
| 8.11E-200 | 0.633378135 | 0.417 | 0.024 | 1.51E-195 | 11 | DNAJA4     |
| 4.93E-197 | 0.563292551 | 0.582 | 0.145 | 9.19E-193 | 11 | SLC25A33   |
| 1.50E-196 | 0.924924577 | 0.923 | 0.635 | 2.81E-192 | 11 | NOSIP      |
| 1.26E-194 | 0.608642376 | 0.515 | 0.073 | 2.34E-190 | 11 | RORA       |
| 2.46E-194 | 0.710075481 | 0.626 | 0.174 | 4.58E-190 | 11 | ZNF296     |
| 4.90E-193 | 0.674468507 | 0.917 | 0.538 | 9.14E-189 | 11 | NFKBID     |
| 9.26E-192 | 0.791446638 | 0.753 | 0.3   | 1.73E-187 | 11 | MAP3K8     |
| 6.78E-191 | 0.732535952 | 0.647 | 0.193 | 1.26E-186 | 11 | TUBA1C     |
| 2.69E-188 | 0.937570001 | 0.457 | 0.045 | 5.02E-184 | 11 | IER3       |
| 7.42E-186 | 0.738541538 | 0.925 | 0.593 | 1.38E-181 | 11 | ARID5B     |
| 9.38E-183 | 0.892822866 | 0.881 | 0.572 | 1.75E-178 | 11 | PRDX1      |
| 5.44E-181 | 0.74626464  | 0.622 | 0.176 | 1.01E-176 | 11 | CKS2       |
| 1.26E-178 | 0.625212404 | 0.943 | 0.662 | 2.35E-174 | 11 | DDX24      |
| 2.27E-176 | 0.726754834 | 0.742 | 0.269 | 4.23E-172 | 11 | GLUL       |
| 2.68E-176 | 0.753764815 | 0.649 | 0.202 | 4.99E-172 | 11 | H2AFX      |
| 2.43E-174 | 0.685131016 | 0.914 | 0.583 | 4.53E-170 | 11 | ELF1       |
| 9.75E-170 | 0.839151855 | 0.928 | 0.607 | 1.82E-165 | 11 | TAGAP      |
| 2.84E-169 | 0.567760285 | 0.963 | 0.72  | 5.30E-165 | 11 | SAT1       |
| 8.77E-169 | 0.721357098 | 0.619 | 0.185 | 1.64E-164 | 11 | ZFAND2A    |
| 9.91E-169 | 0.454629204 | 0.521 | 0.096 | 1.85E-164 | 11 | XIST       |
| 5.10E-168 | 0.731896476 | 0.519 | 0.108 | 9.52E-164 | 11 | ANKRD37    |
| 8.14E-165 | 0.522768688 | 0.69  | 0.254 | 1.52E-160 | 11 | CWC25      |
| 1.44E-163 | 0.722397811 | 0.479 | 0.112 | 2.68E-159 | 11 | SOCS3      |
| 2.75E-159 | 0.51216425  | 0.892 | 0.573 | 5.13E-155 | 11 | ARID4B     |
| 5.81E-158 | 0.67219097  | 0.395 | 0.035 | 1.08E-153 | 11 | CHRNA1     |
| 5.37E-155 | 0.611520615 | 0.884 | 0.495 | 1.00E-150 | 11 | BIRC3      |
| 1.01E-154 | 0.697893268 | 0.854 | 0.462 | 1.89E-150 | 11 | GPR183     |
| 6.38E-153 | 0.580257255 | 0.46  | 0.082 | 1.19E-148 | 11 | FCRL3      |
| 1.83E-152 | 0.436864419 | 0.384 | 0.04  | 3.41E-148 | 11 | AC007364.1 |
| 3.01E-152 | 0.529657101 | 0.953 | 0.715 | 5.61E-148 | 11 | REL        |
| 1.21E-151 | 0.613057356 | 0.697 | 0.274 | 2.26E-147 | 11 | IVNS1ABP   |
| 1.76E-150 | 0.542507141 | 0.749 | 0.346 | 3.28E-146 | 11 | NASP       |



|           |             |       |       |           |    |            |
|-----------|-------------|-------|-------|-----------|----|------------|
| 3.31E-150 | 0.519873186 | 0.827 | 0.424 | 6.17E-146 | 11 | CLK1       |
| 8.54E-150 | 0.578471976 | 0.971 | 0.724 | 1.59E-145 | 11 | YPEL5      |
| 4.93E-149 | 0.59712441  | 0.684 | 0.245 | 9.19E-145 | 11 | FAM53C     |
| 1.38E-148 | 0.591157079 | 0.538 | 0.14  | 2.57E-144 | 11 | DUSP5      |
| 4.58E-148 | 0.621828226 | 0.633 | 0.204 | 8.54E-144 | 11 | PDE4DIP    |
| 1.99E-144 | 0.554460241 | 0.743 | 0.34  | 3.72E-140 | 11 | TSPYL2     |
| 4.40E-143 | 0.566566404 | 0.582 | 0.177 | 8.20E-139 | 11 | C12orf65   |
| 9.37E-143 | 0.634926019 | 0.792 | 0.432 | 1.75E-138 | 11 | IDI1       |
| 2.27E-141 | 0.491149011 | 0.512 | 0.137 | 4.24E-137 | 11 | JMJD6      |
| 8.99E-140 | 0.563670473 | 0.736 | 0.355 | 1.68E-135 | 11 | SINHCAF    |
| 9.20E-140 | 0.533138385 | 0.862 | 0.498 | 1.71E-135 | 11 | SBDS       |
| 3.82E-139 | 0.629859125 | 0.461 | 0.091 | 7.12E-135 | 11 | BCL2L1     |
| 4.97E-139 | 0.518079365 | 0.98  | 0.839 | 9.27E-135 | 11 | CALM1      |
| 3.59E-138 | 0.707370039 | 0.711 | 0.294 | 6.70E-134 | 11 | NFKBIZ     |
| 3.89E-135 | 0.598977391 | 0.851 | 0.513 | 7.24E-131 | 11 | CYCS       |
| 4.29E-135 | 0.516057744 | 0.656 | 0.25  | 8.00E-131 | 11 | DNAJB9     |
| 1.17E-134 | 0.564722583 | 0.329 | 0.042 | 2.19E-130 | 11 | SGK1       |
| 6.93E-133 | 0.417539676 | 0.32  | 0.029 | 1.29E-128 | 11 | EGR3       |
| 2.03E-132 | 0.563396466 | 0.734 | 0.338 | 3.79E-128 | 11 | STMN1      |
| 1.14E-129 | 0.457390012 | 0.603 | 0.195 | 2.12E-125 | 11 | KANSL2     |
| 4.18E-129 | 0.335755231 | 0.46  | 0.096 | 7.80E-125 | 11 | FCRL2      |
| 1.65E-128 | 0.4646374   | 0.843 | 0.501 | 3.08E-124 | 11 | UVRAG      |
| 5.19E-128 | 0.541803793 | 0.663 | 0.253 | 9.68E-124 | 11 | TFRC       |
| 6.40E-128 | 0.49033115  | 0.723 | 0.295 | 1.19E-123 | 11 | AC020916.1 |
| 4.82E-127 | 0.384687525 | 0.956 | 0.785 | 8.98E-123 | 11 | FUS        |
| 1.47E-126 | 0.474274585 | 0.675 | 0.288 | 2.75E-122 | 11 | PLAC8      |
| 3.43E-125 | 0.572655541 | 0.834 | 0.475 | 6.40E-121 | 11 | TUBA4A     |
| 5.70E-125 | 0.477531894 | 0.687 | 0.303 | 1.06E-120 | 11 | OSER1      |
| 3.41E-124 | 0.45059362  | 0.972 | 0.818 | 6.35E-120 | 11 | RHOH       |
| 4.23E-124 | 0.555523147 | 0.722 | 0.351 | 7.89E-120 | 11 | ATP6V0D1   |
| 3.40E-123 | 0.407613151 | 0.909 | 0.65  | 6.33E-119 | 11 | CHD2       |
| 1.13E-122 | 0.547110638 | 0.479 | 0.129 | 2.11E-118 | 11 | ARL5B      |
| 1.31E-122 | 0.567711086 | 0.808 | 0.464 | 2.43E-118 | 11 | HSPE1      |
| 9.25E-122 | 0.918613514 | 0.952 | 0.743 | 1.72E-117 | 11 | HIST1H4C   |
| 3.23E-121 | 0.599484129 | 0.903 | 0.618 | 6.02E-117 | 11 | NEAT1      |
| 4.10E-121 | 0.473815223 | 0.768 | 0.413 | 7.65E-117 | 11 | AZIN1      |
| 1.44E-120 | 0.459057676 | 0.278 | 0.016 | 2.68E-116 | 11 | HSPA2      |
| 2.70E-120 | 0.474499594 | 0.594 | 0.234 | 5.03E-116 | 11 | AHSA1      |
| 3.35E-120 | 0.878716478 | 0.889 | 0.637 | 6.25E-116 | 11 | LTB        |
| 3.92E-120 | 0.603712983 | 0.842 | 0.513 | 7.31E-116 | 11 | MAP1LC3B   |
| 5.66E-120 | 0.534430012 | 0.706 | 0.342 | 1.05E-115 | 11 | SDCBP      |
| 1.72E-119 | 0.539894015 | 0.786 | 0.428 | 3.21E-115 | 11 | YME1L1     |
| 4.52E-119 | 0.564446308 | 0.876 | 0.559 | 8.43E-115 | 11 | DYNLL1     |
| 1.73E-118 | 0.520706465 | 0.767 | 0.397 | 3.23E-114 | 11 | CSRNP1     |
| 7.75E-117 | 0.466715638 | 0.813 | 0.456 | 1.45E-112 | 11 | AMD1       |
| 3.59E-116 | 0.480062936 | 0.303 | 0.025 | 6.69E-112 | 11 | ID2        |

|           |             |       |       |           |    |          |
|-----------|-------------|-------|-------|-----------|----|----------|
| 1.62E-115 | 0.494745816 | 0.627 | 0.25  | 3.01E-111 | 11 | HNRNPAB  |
| 1.72E-115 | 0.681153828 | 0.631 | 0.284 | 3.21E-111 | 11 | TOR3A    |
| 6.85E-115 | 0.506661164 | 0.845 | 0.51  | 1.28E-110 | 11 | TOP1     |
| 6.87E-115 | 0.478274784 | 0.766 | 0.382 | 1.28E-110 | 11 | OFD1     |
| 2.82E-113 | 0.397207777 | 0.428 | 0.095 | 5.26E-109 | 11 | SIRT1    |
| 4.39E-113 | 0.434974808 | 0.867 | 0.561 | 8.19E-109 | 11 | TAF1D    |
| 2.60E-112 | 0.472489174 | 0.853 | 0.518 | 4.85E-108 | 11 | ATP2B1   |
| 6.75E-112 | 0.420799321 | 0.562 | 0.213 | 1.26E-107 | 11 | PPP1R15B |
| 7.97E-112 | 0.505205869 | 0.831 | 0.462 | 1.49E-107 | 11 | LMNA     |
| 1.79E-111 | 0.322496964 | 0.354 | 0.07  | 3.34E-107 | 11 | PPP1R9A  |
| 2.04E-111 | 0.417383009 | 0.934 | 0.717 | 3.80E-107 | 11 | LYN      |
| 4.28E-111 | 0.544665906 | 0.951 | 0.766 | 7.98E-107 | 11 | UBB      |
| 8.48E-111 | 0.633445305 | 0.791 | 0.434 | 1.58E-106 | 11 | KLF10    |
| 1.37E-110 | 0.384978157 | 0.608 | 0.256 | 2.56E-106 | 11 | RRAS2    |
| 6.55E-110 | 0.439562915 | 0.442 | 0.107 | 1.22E-105 | 11 | HRK      |
| 1.21E-109 | 0.417550758 | 0.615 | 0.246 | 2.26E-105 | 11 | CARS2    |
| 1.38E-108 | 0.622368128 | 0.619 | 0.243 | 2.57E-104 | 11 | TNFAIP3  |
| 1.63E-108 | 0.57926747  | 0.494 | 0.18  | 3.04E-104 | 11 | DUSP10   |
| 3.11E-108 | 0.373933315 | 0.236 | 0.008 | 5.80E-104 | 11 | GADD45G  |
| 3.17E-108 | 0.438946528 | 0.84  | 0.508 | 5.91E-104 | 11 | WSB1     |
| 4.26E-108 | 0.438735961 | 0.583 | 0.225 | 7.95E-104 | 11 | TSC22D2  |
| 1.14E-106 | 0.362290804 | 0.987 | 0.806 | 2.12E-102 | 11 | CXCR4    |
| 1.54E-105 | 0.412839862 | 0.728 | 0.384 | 2.86E-101 | 11 | BUD31    |
| 3.23E-105 | 0.460970993 | 0.909 | 0.664 | 6.02E-101 | 11 | CALR     |
| 3.80E-105 | 0.366650497 | 0.368 | 0.085 | 7.09E-101 | 11 | LGMN     |
| 3.22E-103 | 0.504117435 | 0.659 | 0.274 | 6.00E-99  | 11 | MARCKSL1 |
| 3.81E-103 | 0.411536392 | 0.474 | 0.15  | 7.10E-99  | 11 | SLC1A5   |
| 4.97E-103 | 0.400595196 | 0.53  | 0.193 | 9.26E-99  | 11 | ATG101   |
| 5.93E-103 | 0.530191152 | 0.864 | 0.603 | 1.11E-98  | 11 | SAP18    |
| 8.73E-103 | 0.273307305 | 0.254 | 0.03  | 1.63E-98  | 11 | CA8      |
| 2.85E-102 | 0.447924482 | 0.564 | 0.188 | 5.32E-98  | 11 | SERPINF1 |
| 3.94E-102 | 0.403789491 | 0.848 | 0.549 | 7.35E-98  | 11 | SFPQ     |
| 3.58E-101 | 0.42305555  | 0.487 | 0.162 | 6.67E-97  | 11 | PRR7     |
| 8.40E-101 | 0.276244767 | 0.357 | 0.087 | 1.57E-96  | 11 | RABGEF1  |
| 2.36E-100 | 0.360368285 | 0.699 | 0.368 | 4.40E-96  | 11 | CSNK1D   |
| 2.97E-100 | 0.33666406  | 0.512 | 0.18  | 5.54E-96  | 11 | SAMD8    |
| 7.84E-100 | 0.53251092  | 0.793 | 0.458 | 1.46E-95  | 11 | CXCR5    |
| 1.17E-98  | 0.470337648 | 0.834 | 0.564 | 2.18E-94  | 11 | ATP6V0E1 |
| 5.85E-98  | 0.770591979 | 0.262 | 0.024 | 1.09E-93  | 11 | EGR4     |
| 7.90E-98  | 0.533149423 | 0.521 | 0.195 | 1.47E-93  | 11 | TWISTNB  |
| 1.59E-97  | 0.365871144 | 0.537 | 0.207 | 2.97E-93  | 11 | NUDT4    |
| 2.95E-97  | 0.396407944 | 0.758 | 0.433 | 5.50E-93  | 11 | BACH1    |
| 3.37E-97  | 0.367169404 | 0.544 | 0.21  | 6.29E-93  | 11 | MYLIP    |
| 3.93E-97  | 0.340562935 | 0.369 | 0.069 | 7.32E-93  | 11 | CYBB     |
| 7.72E-97  | 0.315724884 | 0.291 | 0.04  | 1.44E-92  | 11 | NET1     |
| 1.41E-96  | 0.28594176  | 0.292 | 0.036 | 2.62E-92  | 11 | HCK      |

|          |             |       |       |          |    |         |
|----------|-------------|-------|-------|----------|----|---------|
| 6.73E-96 | 0.331727368 | 0.626 | 0.266 | 1.25E-91 | 11 | ZNF394  |
| 9.25E-96 | 0.405380226 | 0.522 | 0.192 | 1.72E-91 | 11 | TOB1    |
| 1.16E-95 | 0.403303995 | 0.916 | 0.69  | 2.15E-91 | 11 | LITAF   |
| 2.86E-95 | 0.423671863 | 0.606 | 0.273 | 5.33E-91 | 11 | ARL4A   |
| 4.48E-94 | 0.388792887 | 0.712 | 0.372 | 8.36E-90 | 11 | CHD4    |
| 1.86E-93 | 0.428658173 | 0.657 | 0.343 | 3.46E-89 | 11 | PHACTR1 |
| 3.50E-93 | 0.542011938 | 0.98  | 0.83  | 6.53E-89 | 11 | BTG2    |
| 5.39E-93 | 0.525443469 | 0.845 | 0.554 | 1.00E-88 | 11 | TPI1    |
| 5.60E-93 | 0.336749159 | 0.634 | 0.304 | 1.04E-88 | 11 | CREBRF  |
| 1.16E-92 | 0.473782303 | 0.307 | 0.056 | 2.16E-88 | 11 | RGS16   |
| 3.48E-92 | 0.384581767 | 0.475 | 0.18  | 6.49E-88 | 11 | IER5    |
| 5.85E-92 | 0.362980196 | 0.769 | 0.481 | 1.09E-87 | 11 | ZC3H15  |
| 5.96E-92 | 0.7776032   | 0.23  | 0.02  | 1.11E-87 | 11 | RRAD    |
| 1.86E-91 | 0.325144878 | 0.523 | 0.204 | 3.46E-87 | 11 | YAF2    |
| 8.34E-89 | 0.307216869 | 0.306 | 0.046 | 1.55E-84 | 11 | GTSF1   |
| 1.42E-88 | 0.336752746 | 0.562 | 0.234 | 2.65E-84 | 11 | TOB2    |
| 1.94E-88 | 0.396369837 | 0.691 | 0.362 | 3.61E-84 | 11 | KDM2A   |
| 6.89E-88 | 0.35039458  | 0.77  | 0.465 | 1.28E-83 | 11 | SNX9    |
| 1.85E-87 | 0.402958108 | 0.788 | 0.476 | 3.45E-83 | 11 | HNRNPH3 |
| 3.94E-87 | 0.368794885 | 0.803 | 0.492 | 7.35E-83 | 11 | RAP1B   |
| 2.03E-86 | 0.308315305 | 0.475 | 0.166 | 3.79E-82 | 11 | APBB2   |
| 4.00E-86 | 0.330099933 | 0.511 | 0.179 | 7.46E-82 | 11 | ZBTB10  |
| 4.42E-86 | 0.311314577 | 0.35  | 0.101 | 8.23E-82 | 11 | ATP1B1  |
| 2.30E-85 | 0.327743992 | 0.658 | 0.316 | 4.29E-81 | 11 | CIR1    |
| 3.46E-85 | 0.357141423 | 0.417 | 0.142 | 6.45E-81 | 11 | NFKBIE  |
| 1.18E-84 | 0.399128873 | 0.963 | 0.783 | 2.19E-80 | 11 | TXNIP   |
| 4.03E-83 | 0.27042814  | 0.348 | 0.091 | 7.51E-79 | 11 | CHKA    |
| 4.75E-83 | 0.3237296   | 0.594 | 0.284 | 8.85E-79 | 11 | BCL7B   |
| 6.61E-83 | 0.258456073 | 0.358 | 0.105 | 1.23E-78 | 11 | MEPCE   |
| 9.28E-83 | 0.381251526 | 0.851 | 0.542 | 1.73E-78 | 11 | HSPA5   |
| 1.30E-82 | 0.477370833 | 0.46  | 0.174 | 2.43E-78 | 11 | TRAF1   |
| 1.40E-82 | 0.357608836 | 0.664 | 0.319 | 2.61E-78 | 11 | ETF1    |
| 2.85E-82 | 0.685191419 | 0.369 | 0.105 | 5.32E-78 | 11 | GEM     |
| 3.77E-82 | 0.37536714  | 0.331 | 0.074 | 7.03E-78 | 11 | GRASP   |
| 4.16E-82 | 0.305920531 | 0.451 | 0.158 | 7.76E-78 | 11 | NBPF10  |
| 9.82E-82 | 0.385173129 | 0.366 | 0.098 | 1.83E-77 | 11 | MARCKS  |
| 1.24E-81 | 0.324985168 | 0.575 | 0.261 | 2.30E-77 | 11 | ARIH1   |
| 1.83E-81 | 0.297583741 | 0.196 | 0.011 | 3.40E-77 | 11 | BAMBI   |
| 2.58E-81 | 0.36651414  | 0.827 | 0.532 | 4.80E-77 | 11 | BZW1    |
| 4.81E-80 | 0.281984578 | 0.526 | 0.223 | 8.96E-76 | 11 | NFKBIB  |
| 6.98E-80 | 0.364947065 | 0.716 | 0.39  | 1.30E-75 | 11 | DDX39A  |
| 7.49E-80 | 0.425667761 | 0.384 | 0.117 | 1.40E-75 | 11 | SOCS1   |
| 8.25E-80 | 0.259525847 | 0.209 | 0.016 | 1.54E-75 | 11 | SNAI1   |
| 9.82E-80 | 0.300435753 | 0.61  | 0.287 | 1.83E-75 | 11 | COQ10B  |
| 1.07E-79 | 0.251931252 | 0.362 | 0.112 | 2.00E-75 | 11 | SLC16A1 |
| 1.17E-79 | 0.293098136 | 0.485 | 0.194 | 2.18E-75 | 11 | EEA1    |

|          |             |       |       |          |    |            |
|----------|-------------|-------|-------|----------|----|------------|
| 3.22E-79 | 0.396497689 | 0.747 | 0.417 | 6.01E-75 | 11 | FGR        |
| 4.55E-79 | 0.42226925  | 0.866 | 0.629 | 8.48E-75 | 11 | SOD1       |
| 7.02E-79 | 0.425320657 | 0.983 | 0.876 | 1.31E-74 | 11 | TSC22D3    |
| 8.34E-79 | 0.359985241 | 0.627 | 0.308 | 1.55E-74 | 11 | PAF1       |
| 8.43E-79 | 0.287215522 | 0.411 | 0.132 | 1.57E-74 | 11 | ATF1       |
| 9.34E-79 | 0.282167626 | 0.384 | 0.125 | 1.74E-74 | 11 | NABP1      |
| 2.90E-78 | 0.419339909 | 0.245 | 0.037 | 5.41E-74 | 11 | PHLDA1     |
| 4.44E-78 | 0.323333799 | 0.429 | 0.159 | 8.27E-74 | 11 | MAP1LC3A   |
| 1.48E-77 | 0.337097387 | 0.234 | 0.046 | 2.76E-73 | 11 | ARG2       |
| 2.80E-77 | 0.35405773  | 0.573 | 0.255 | 5.21E-73 | 11 | RHEB       |
| 4.64E-75 | 0.285053889 | 0.611 | 0.285 | 8.65E-71 | 11 | PER1       |
| 4.12E-74 | 0.284483429 | 0.284 | 0.073 | 7.68E-70 | 11 | RNF144B    |
| 4.51E-74 | 0.355294041 | 0.496 | 0.204 | 8.40E-70 | 11 | ZNF106     |
| 6.25E-74 | 0.304180462 | 0.393 | 0.126 | 1.16E-69 | 11 | JMY        |
| 1.11E-73 | 0.374408017 | 0.613 | 0.275 | 2.06E-69 | 11 | NBPF14     |
| 5.55E-73 | 0.328468798 | 0.712 | 0.411 | 1.03E-68 | 11 | DENND4A    |
| 1.18E-72 | 0.284507131 | 0.495 | 0.201 | 2.21E-68 | 11 | CHORDC1    |
| 1.42E-72 | 0.390923893 | 0.734 | 0.432 | 2.65E-68 | 11 | ATF4       |
| 1.64E-72 | 0.424941846 | 0.645 | 0.333 | 3.07E-68 | 11 | SERPINB9   |
| 5.80E-72 | 0.316169647 | 0.682 | 0.36  | 1.08E-67 | 11 | NFE2L2     |
| 1.88E-71 | 0.395318994 | 0.425 | 0.156 | 3.50E-67 | 11 | PPIF       |
| 7.25E-71 | 0.266632487 | 0.663 | 0.357 | 1.35E-66 | 11 | GOLGB1     |
| 3.48E-70 | 0.289421196 | 0.722 | 0.421 | 6.49E-66 | 11 | STK17A     |
| 4.05E-70 | 0.270779205 | 0.516 | 0.218 | 7.55E-66 | 11 | SEMA4B     |
| 3.62E-69 | 0.304824093 | 0.584 | 0.272 | 6.75E-65 | 11 | RSBN1      |
| 4.89E-68 | 0.301343497 | 0.151 | 0.007 | 9.12E-64 | 11 | C6orf222   |
| 5.57E-68 | 0.272711328 | 0.805 | 0.509 | 1.04E-63 | 11 | GPBP1      |
| 1.23E-67 | 0.356502687 | 0.332 | 0.091 | 2.29E-63 | 11 | ID1        |
| 5.90E-67 | 0.293040988 | 0.607 | 0.302 | 1.10E-62 | 11 | ATF5       |
| 7.72E-67 | 0.252951053 | 0.51  | 0.249 | 1.44E-62 | 11 | RAB8B      |
| 1.50E-66 | 0.500312366 | 0.771 | 0.501 | 2.79E-62 | 11 | RGCC       |
| 1.95E-66 | 0.328624777 | 0.664 | 0.362 | 3.64E-62 | 11 | WTAP       |
| 2.78E-66 | 0.309122578 | 0.41  | 0.151 | 5.18E-62 | 11 | TLE1       |
| 5.78E-66 | 0.27010276  | 0.49  | 0.202 | 1.08E-61 | 11 | SLC20A1    |
| 7.67E-66 | 0.278681517 | 0.71  | 0.389 | 1.43E-61 | 11 | TRA2A      |
| 1.58E-65 | 0.658498821 | 0.617 | 0.344 | 2.94E-61 | 11 | HSPB1      |
| 7.96E-65 | 0.274396635 | 0.526 | 0.238 | 1.48E-60 | 11 | BCL2L11    |
| 9.53E-65 | 1.411107533 | 0.168 | 0.015 | 1.78E-60 | 11 | HSPA6      |
| 1.34E-64 | 0.397115209 | 0.964 | 0.852 | 2.49E-60 | 11 | NPM1       |
| 1.72E-64 | 0.28140044  | 0.342 | 0.11  | 3.20E-60 | 11 | AL121944.1 |
| 5.57E-64 | 0.294332887 | 0.542 | 0.26  | 1.04E-59 | 11 | WHAMM      |
| 7.44E-64 | 0.299788955 | 0.831 | 0.539 | 1.39E-59 | 11 | CD79B      |
| 1.80E-63 | 0.287838368 | 0.699 | 0.371 | 3.36E-59 | 11 | CCDC191    |
| 2.60E-63 | 0.338017003 | 0.926 | 0.731 | 4.85E-59 | 11 | ZFP36L2    |
| 7.30E-63 | 0.432696924 | 0.539 | 0.253 | 1.36E-58 | 11 | KDM2B      |
| 8.21E-63 | 0.487145595 | 0.649 | 0.388 | 1.53E-58 | 11 | PIM3       |

|          |             |       |       |          |    |            |
|----------|-------------|-------|-------|----------|----|------------|
| 1.41E-62 | 0.304986188 | 0.838 | 0.585 | 2.63E-58 | 11 | BCLAF1     |
| 1.78E-62 | 0.250505942 | 0.164 | 0.012 | 3.32E-58 | 11 | IFI27      |
| 1.81E-62 | 0.261523462 | 0.336 | 0.1   | 3.38E-58 | 11 | SLC37A1    |
| 4.43E-62 | 0.262624981 | 0.322 | 0.108 | 8.25E-58 | 11 | ZBTB2      |
| 6.82E-62 | 0.26066866  | 0.507 | 0.23  | 1.27E-57 | 11 | GLIPR1     |
| 1.63E-61 | 0.289114098 | 0.807 | 0.567 | 3.04E-57 | 11 | AC016831.7 |
| 1.92E-61 | 0.287492236 | 0.577 | 0.293 | 3.58E-57 | 11 | NOP56      |
| 5.33E-61 | 0.390502024 | 0.674 | 0.388 | 9.94E-57 | 11 | INSIG1     |
| 9.89E-61 | 0.412720512 | 0.754 | 0.469 | 1.84E-56 | 11 | RILPL2     |
| 4.31E-60 | 0.296444962 | 0.667 | 0.389 | 8.04E-56 | 11 | SYAP1      |
| 4.42E-59 | 0.324486606 | 0.774 | 0.527 | 8.24E-55 | 11 | CIB1       |
| 8.82E-59 | 0.302089816 | 0.478 | 0.216 | 1.64E-54 | 11 | BCL3       |
| 6.20E-58 | 0.318156427 | 0.912 | 0.718 | 1.16E-53 | 11 | TMBIM6     |
| 9.50E-58 | 0.485595974 | 0.733 | 0.478 | 1.77E-53 | 11 | H2AFZ      |
| 3.57E-57 | 0.352861056 | 0.458 | 0.217 | 6.65E-53 | 11 | METTTL21A  |
| 6.35E-57 | 0.274225958 | 0.562 | 0.308 | 1.18E-52 | 11 | EHD1       |
| 6.44E-57 | 0.295883319 | 0.875 | 0.681 | 1.20E-52 | 11 | YBX3       |
| 9.90E-57 | 0.257838731 | 0.472 | 0.226 | 1.85E-52 | 11 | MRPS6      |
| 5.87E-56 | 0.301160648 | 0.576 | 0.292 | 1.09E-51 | 11 | SNHG7      |
| 7.56E-56 | 0.308241633 | 0.861 | 0.636 | 1.41E-51 | 11 | IRF8       |
| 1.41E-55 | 0.270741026 | 0.39  | 0.166 | 2.63E-51 | 11 | STX11      |
| 1.17E-53 | 0.269439831 | 0.824 | 0.557 | 2.17E-49 | 11 | DDX21      |
| 2.68E-53 | 0.257707915 | 0.336 | 0.127 | 4.99E-49 | 11 | FAM210A    |
| 2.86E-53 | 0.382626234 | 0.421 | 0.18  | 5.34E-49 | 11 | MRPL18     |
| 7.24E-53 | 0.255644549 | 0.866 | 0.681 | 1.35E-48 | 11 | SERP1      |
| 7.56E-51 | 0.284901329 | 0.761 | 0.493 | 1.41E-46 | 11 | VDAC2      |
| 2.37E-50 | 0.308769476 | 0.759 | 0.516 | 4.41E-46 | 11 | SNHG8      |
| 9.02E-50 | 0.309237903 | 0.507 | 0.242 | 1.68E-45 | 11 | PLEK       |
| 1.09E-49 | 0.259085363 | 0.227 | 0.07  | 2.04E-45 | 11 | AREG       |
| 6.77E-48 | 0.25462896  | 0.165 | 0.035 | 1.26E-43 | 11 | RASD1      |
| 1.61E-47 | 0.316469234 | 0.781 | 0.546 | 3.00E-43 | 11 | PELI1      |
| 3.63E-46 | 0.341499549 | 0.577 | 0.298 | 6.76E-42 | 11 | H1FX       |
| 1.23E-44 | 0.256917259 | 0.553 | 0.323 | 2.29E-40 | 11 | PEA15      |
| 1.35E-44 | 0.253953278 | 0.517 | 0.287 | 2.51E-40 | 11 | JPT1       |
| 1.38E-43 | 0.355330209 | 0.439 | 0.205 | 2.58E-39 | 11 | PTGER4     |
| 6.76E-43 | 0.273959178 | 0.979 | 0.872 | 1.26E-38 | 11 | CFL1       |
| 6.03E-34 | 0.336427425 | 0.199 | 0.069 | 1.12E-29 | 11 | CCL5       |
| 8.31E-25 | 0.40121643  | 0.149 | 0.044 | 1.55E-20 | 11 | IFIT2      |
| 1.24E-24 | 0.271208536 | 0.846 | 0.68  | 2.32E-20 | 11 | ATP6V0C    |
| 8.80E-24 | 0.851816063 | 0.199 | 0.075 | 1.64E-19 | 11 | CCL4       |
| 2.49E-21 | 0.356901104 | 0.693 | 0.514 | 4.64E-17 | 11 | HIST1H1E   |
| 7.51E-49 | 0.265033843 | 0.217 | 0.515 | 1.40E-44 | 12 | PAPOLA     |
| 3.71E-48 | 0.261918851 | 0.177 | 0.45  | 6.92E-44 | 12 | NT5C       |
| 6.02E-47 | 0.251357789 | 0.173 | 0.445 | 1.12E-42 | 12 | SCAND1     |
| 7.10E-46 | 0.251685859 | 0.168 | 0.414 | 1.32E-41 | 12 | SEC31A     |
| 3.97E-44 | 0.314852014 | 0.235 | 0.542 | 7.41E-40 | 12 | HADHA      |

|          |             |       |       |          |    |           |
|----------|-------------|-------|-------|----------|----|-----------|
| 4.17E-43 | 0.25435129  | 0.163 | 0.409 | 7.78E-39 | 12 | GLO1      |
| 4.95E-43 | 0.278403447 | 0.272 | 0.599 | 9.23E-39 | 12 | CD53      |
| 2.24E-42 | 0.259361643 | 0.252 | 0.596 | 4.18E-38 | 12 | THRAP3    |
| 4.90E-42 | 0.262961087 | 0.252 | 0.569 | 9.14E-38 | 12 | CNPY3     |
| 5.65E-40 | 0.293008878 | 0.177 | 0.409 | 1.05E-35 | 12 | SMARCA5   |
| 7.06E-40 | 0.308073325 | 0.24  | 0.529 | 1.32E-35 | 12 | ABI1      |
| 9.08E-40 | 0.262158961 | 0.212 | 0.515 | 1.69E-35 | 12 | SPCS1     |
| 1.69E-39 | 0.254378681 | 0.138 | 0.334 | 3.15E-35 | 12 | DGKA      |
| 7.18E-39 | 0.254279654 | 0.131 | 0.329 | 1.34E-34 | 12 | CDK12     |
| 7.69E-39 | 0.265616336 | 0.161 | 0.404 | 1.43E-34 | 12 | ACIN1     |
| 8.80E-39 | 0.258223224 | 0.176 | 0.427 | 1.64E-34 | 12 | HMGB2     |
| 4.08E-38 | 0.284985308 | 0.19  | 0.451 | 7.60E-34 | 12 | SERPINB1  |
| 5.27E-38 | 0.270696201 | 0.217 | 0.503 | 9.83E-34 | 12 | EIF1B     |
| 1.15E-37 | 0.270240062 | 0.157 | 0.382 | 2.14E-33 | 12 | TAOK3     |
| 1.48E-37 | 0.29097137  | 0.255 | 0.551 | 2.76E-33 | 12 | GTF3A     |
| 2.04E-37 | 0.257018836 | 0.206 | 0.473 | 3.80E-33 | 12 | SECISBP2L |
| 2.29E-37 | 0.268468958 | 0.157 | 0.389 | 4.26E-33 | 12 | ANAPC5    |
| 5.66E-37 | 0.273711952 | 0.192 | 0.444 | 1.06E-32 | 12 | ATOX1     |
| 6.27E-37 | 0.259715147 | 0.186 | 0.424 | 1.17E-32 | 12 | PRPF4B    |
| 6.79E-37 | 0.261080779 | 0.148 | 0.384 | 1.27E-32 | 12 | OS9       |
| 1.42E-36 | 0.267583786 | 0.19  | 0.466 | 2.65E-32 | 12 | NDFIP1    |
| 1.89E-36 | 0.254599077 | 0.119 | 0.294 | 3.53E-32 | 12 | SUN1      |
| 2.28E-36 | 0.267698415 | 0.225 | 0.518 | 4.25E-32 | 12 | Sep-02    |
| 2.90E-36 | 0.291045266 | 0.134 | 0.313 | 5.40E-32 | 12 | RBL2      |
| 3.52E-36 | 0.28269528  | 0.163 | 0.396 | 6.56E-32 | 12 | DNAJC15   |
| 6.35E-36 | 0.281192383 | 0.174 | 0.423 | 1.18E-31 | 12 | RBBP4     |
| 7.75E-36 | 0.271135093 | 0.202 | 0.483 | 1.44E-31 | 12 | PNRC2     |
| 9.76E-36 | 0.305450788 | 0.171 | 0.42  | 1.82E-31 | 12 | IK        |
| 1.07E-35 | 0.304160419 | 0.186 | 0.399 | 2.00E-31 | 12 | ASH1L     |
| 2.46E-35 | 0.252407021 | 0.105 | 0.262 | 4.58E-31 | 12 | BIN2      |
| 3.62E-35 | 0.25367135  | 0.174 | 0.424 | 6.75E-31 | 12 | U2SURP    |
| 4.23E-35 | 0.267884057 | 0.112 | 0.286 | 7.88E-31 | 12 | Mar-07    |
| 4.78E-35 | 0.251111176 | 0.203 | 0.472 | 8.91E-31 | 12 | NIPBL     |
| 5.39E-35 | 0.254168187 | 0.256 | 0.571 | 1.00E-30 | 12 | ACTR2     |
| 6.71E-35 | 0.260879243 | 0.137 | 0.338 | 1.25E-30 | 12 | HSD17B11  |
| 7.35E-35 | 0.283226373 | 0.254 | 0.537 | 1.37E-30 | 12 | TNRC6B    |
| 1.28E-34 | 0.272386397 | 0.176 | 0.406 | 2.38E-30 | 12 | RNMT      |
| 2.16E-34 | 0.259718004 | 0.188 | 0.431 | 4.03E-30 | 12 | UBE2J1    |
| 2.96E-34 | 0.277576877 | 0.168 | 0.39  | 5.52E-30 | 12 | UPF3A     |
| 1.14E-33 | 0.250758435 | 0.156 | 0.363 | 2.13E-29 | 12 | SREK1     |
| 1.29E-33 | 0.278798471 | 0.203 | 0.47  | 2.41E-29 | 12 | ACAP2     |
| 1.78E-33 | 0.279286915 | 0.125 | 0.285 | 3.31E-29 | 12 | CASP8     |
| 3.89E-33 | 0.271458382 | 0.207 | 0.447 | 7.25E-29 | 12 | CFLAR     |
| 9.43E-33 | 0.272796665 | 0.222 | 0.492 | 1.76E-28 | 12 | B4GALT1   |
| 9.59E-33 | 0.330814697 | 0.178 | 0.406 | 1.79E-28 | 12 | CANX      |
| 1.04E-32 | 0.307219565 | 0.281 | 0.591 | 1.94E-28 | 12 | PSAP      |

|          |             |       |       |          |    |            |
|----------|-------------|-------|-------|----------|----|------------|
| 1.24E-32 | 0.309510264 | 0.258 | 0.566 | 2.31E-28 | 12 | ILF3       |
| 1.62E-32 | 0.28674815  | 0.246 | 0.546 | 3.02E-28 | 12 | SMDT1      |
| 1.63E-32 | 0.288608204 | 0.2   | 0.472 | 3.04E-28 | 12 | LTA4H      |
| 1.72E-32 | 0.260130345 | 0.098 | 0.253 | 3.21E-28 | 12 | IRF2       |
| 8.89E-32 | 0.297359928 | 0.157 | 0.353 | 1.66E-27 | 12 | ZNF644     |
| 1.22E-31 | 0.25988301  | 0.279 | 0.622 | 2.27E-27 | 12 | PPP1CC     |
| 2.13E-31 | 0.298733779 | 0.174 | 0.404 | 3.96E-27 | 12 | BTK        |
| 2.19E-31 | 0.291658779 | 0.199 | 0.445 | 4.08E-27 | 12 | CCDC69     |
| 2.21E-31 | 0.26914815  | 0.167 | 0.38  | 4.13E-27 | 12 | PAX5       |
| 4.03E-31 | 0.276066685 | 0.182 | 0.409 | 7.52E-27 | 12 | CHD9       |
| 4.77E-31 | 0.253709083 | 0.186 | 0.411 | 8.89E-27 | 12 | ATM        |
| 4.85E-31 | 0.284848647 | 0.129 | 0.312 | 9.05E-27 | 12 | TBC1D1     |
| 5.35E-31 | 0.28380665  | 0.272 | 0.561 | 9.98E-27 | 12 | EVL        |
| 7.06E-31 | 0.257059755 | 0.116 | 0.304 | 1.32E-26 | 12 | SSR1       |
| 7.68E-31 | 0.341529452 | 0.202 | 0.44  | 1.43E-26 | 12 | SPCS2      |
| 1.02E-30 | 0.252696424 | 0.162 | 0.387 | 1.91E-26 | 12 | GLG1       |
| 1.05E-30 | 0.251465953 | 0.311 | 0.65  | 1.96E-26 | 12 | MTDH       |
| 1.31E-30 | 0.250207484 | 0.131 | 0.312 | 2.45E-26 | 12 | FRYL       |
| 1.49E-30 | 0.285212345 | 0.111 | 0.272 | 2.77E-26 | 12 | PARVG      |
| 2.18E-30 | 0.314113027 | 0.21  | 0.465 | 4.07E-26 | 12 | ARL6IP5    |
| 9.35E-30 | 0.323748038 | 0.233 | 0.512 | 1.74E-25 | 12 | EIF2S3     |
| 9.95E-30 | 0.317390827 | 0.219 | 0.455 | 1.85E-25 | 12 | CD19       |
| 1.79E-29 | 0.327713843 | 0.169 | 0.383 | 3.33E-25 | 12 | SETX       |
| 8.85E-29 | 0.268280253 | 0.16  | 0.372 | 1.65E-24 | 12 | TBC1D22A   |
| 1.10E-28 | 0.302916283 | 0.274 | 0.596 | 2.05E-24 | 12 | MSN        |
| 1.52E-28 | 0.300122432 | 0.169 | 0.364 | 2.84E-24 | 12 | UGCG       |
| 2.17E-28 | 0.275434611 | 0.225 | 0.453 | 4.05E-24 | 12 | SMIM14     |
| 5.05E-28 | 0.277014069 | 0.107 | 0.268 | 9.41E-24 | 12 | NDUFB5     |
| 5.59E-28 | 0.325223992 | 0.143 | 0.334 | 1.04E-23 | 12 | ANP32E     |
| 6.95E-28 | 0.274778801 | 0.157 | 0.349 | 1.30E-23 | 12 | SCAF4      |
| 1.01E-27 | 0.302991806 | 0.202 | 0.439 | 1.88E-23 | 12 | EBLN3P     |
| 1.19E-27 | 0.257742274 | 0.108 | 0.285 | 2.23E-23 | 12 | CACYBP     |
| 1.26E-27 | 0.268472944 | 0.18  | 0.413 | 2.34E-23 | 12 | WDFY4      |
| 3.67E-27 | 0.267231931 | 0.206 | 0.45  | 6.84E-23 | 12 | PTPN22     |
| 5.27E-27 | 0.261338319 | 0.1   | 0.239 | 9.83E-23 | 12 | NT5DC1     |
| 5.87E-27 | 0.278996227 | 0.255 | 0.541 | 1.09E-22 | 12 | ATRX       |
| 6.69E-27 | 0.292345097 | 0.129 | 0.29  | 1.25E-22 | 12 | ETS1       |
| 7.21E-27 | 0.339043753 | 0.213 | 0.448 | 1.34E-22 | 12 | MBD4       |
| 7.23E-27 | 0.271642184 | 0.121 | 0.284 | 1.35E-22 | 12 | VPS36      |
| 8.21E-27 | 0.253139613 | 0.33  | 0.677 | 1.53E-22 | 12 | Sep-06     |
| 8.99E-27 | 1.170667913 | 0.359 | 0.245 | 1.68E-22 | 12 | AC007952.4 |
| 9.76E-27 | 0.270162566 | 0.108 | 0.261 | 1.82E-22 | 12 | FUBP1      |
| 1.08E-26 | 0.359462697 | 0.24  | 0.474 | 2.01E-22 | 12 | ZCCHC7     |
| 1.13E-26 | 0.25883077  | 0.201 | 0.48  | 2.11E-22 | 12 | RAD21      |
| 1.44E-26 | 0.317206914 | 0.275 | 0.583 | 2.69E-22 | 12 | SET        |
| 1.59E-26 | 0.259493572 | 0.16  | 0.358 | 2.96E-22 | 12 | NFAT5      |

|          |             |       |       |          |    |          |
|----------|-------------|-------|-------|----------|----|----------|
| 1.75E-26 | 0.280887471 | 0.23  | 0.484 | 3.26E-22 | 12 | BLNK     |
| 1.91E-26 | 0.262371979 | 0.359 | 0.732 | 3.56E-22 | 12 | SKP1     |
| 2.15E-26 | 0.272562772 | 0.34  | 0.671 | 4.01E-22 | 12 | HNRNPA3  |
| 2.29E-26 | 0.331346608 | 0.236 | 0.479 | 4.27E-22 | 12 | ZC3HAV1  |
| 2.50E-26 | 0.279877467 | 0.153 | 0.341 | 4.67E-22 | 12 | SYTL1    |
| 2.98E-26 | 0.257462588 | 0.233 | 0.526 | 5.56E-22 | 12 | PTPN1    |
| 3.85E-26 | 0.28909315  | 0.147 | 0.327 | 7.18E-22 | 12 | TTC17    |
| 4.23E-26 | 0.271650088 | 0.106 | 0.245 | 7.89E-22 | 12 | ZNF506   |
| 4.81E-26 | 0.259841967 | 0.302 | 0.621 | 8.97E-22 | 12 | C12orf57 |
| 7.11E-26 | 0.284550388 | 0.125 | 0.275 | 1.32E-21 | 12 | ARHGEF3  |
| 7.36E-26 | 0.355499641 | 0.189 | 0.382 | 1.37E-21 | 12 | WDR11    |
| 1.07E-25 | 0.575557889 | 0.659 | 0.764 | 2.00E-21 | 12 | RALGPS2  |
| 1.27E-25 | 0.278946174 | 0.25  | 0.554 | 2.37E-21 | 12 | IQGAP1   |
| 1.46E-25 | 0.287791497 | 0.131 | 0.291 | 2.73E-21 | 12 | WDFY1    |
| 1.84E-25 | 0.271613236 | 0.196 | 0.394 | 3.42E-21 | 12 | Mar-01   |
| 1.85E-25 | 0.259831408 | 0.165 | 0.372 | 3.45E-21 | 12 | GOLGA4   |
| 1.99E-25 | 0.26915389  | 0.1   | 0.248 | 3.71E-21 | 12 | STAT2    |
| 2.23E-25 | 0.299405549 | 0.135 | 0.293 | 4.15E-21 | 12 | TBC1D5   |
| 2.94E-25 | 0.321617031 | 0.248 | 0.517 | 5.48E-21 | 12 | RABGAP1L |
| 3.32E-25 | 0.353363488 | 0.175 | 0.368 | 6.20E-21 | 12 | KIAA0040 |
| 3.61E-25 | 0.270417043 | 0.089 | 0.199 | 6.73E-21 | 12 | ZBED5    |
| 4.34E-25 | 0.261646231 | 0.15  | 0.338 | 8.10E-21 | 12 | SECISBP2 |
| 4.45E-25 | 0.265732834 | 0.22  | 0.479 | 8.30E-21 | 12 | PLEKHG1  |
| 4.55E-25 | 0.303144586 | 0.152 | 0.327 | 8.48E-21 | 12 | RRBP1    |
| 4.97E-25 | 0.254217276 | 0.085 | 0.207 | 9.27E-21 | 12 | LMAN1    |
| 6.30E-25 | 0.312958813 | 0.304 | 0.584 | 1.18E-20 | 12 | SYK      |
| 7.44E-25 | 0.276360363 | 0.24  | 0.531 | 1.39E-20 | 12 | ZNF207   |
| 9.77E-25 | 0.31553649  | 0.17  | 0.366 | 1.82E-20 | 12 | FCGR2B   |
| 2.00E-24 | 0.267832165 | 0.107 | 0.251 | 3.73E-20 | 12 | ZC3H7A   |
| 3.06E-24 | 0.274651719 | 0.225 | 0.475 | 5.70E-20 | 12 | CAPG     |
| 3.19E-24 | 0.321787831 | 0.256 | 0.492 | 5.95E-20 | 12 | BCL11A   |
| 6.62E-24 | 0.367507707 | 0.177 | 0.342 | 1.23E-19 | 12 | USP22    |
| 7.40E-24 | 0.271246525 | 0.12  | 0.269 | 1.38E-19 | 12 | STIM2    |
| 8.07E-24 | 0.260957908 | 0.095 | 0.228 | 1.50E-19 | 12 | CALCOCO1 |
| 9.56E-24 | 0.270255841 | 0.271 | 0.554 | 1.78E-19 | 12 | CELF2    |
| 9.69E-24 | 0.275034249 | 0.153 | 0.334 | 1.81E-19 | 12 | LNPEP    |
| 1.07E-23 | 0.264498148 | 0.093 | 0.201 | 2.00E-19 | 12 | SAMD9L   |
| 1.31E-23 | 0.28373756  | 0.203 | 0.404 | 2.45E-19 | 12 | TRAF3IP3 |
| 1.54E-23 | 0.270999087 | 0.11  | 0.265 | 2.88E-19 | 12 | SPCS3    |
| 1.58E-23 | 0.259370142 | 0.101 | 0.249 | 2.95E-19 | 12 | GMDS     |
| 1.59E-23 | 0.299223975 | 0.122 | 0.274 | 2.97E-19 | 12 | USP48    |
| 2.02E-23 | 0.298629042 | 0.176 | 0.37  | 3.76E-19 | 12 | TGFBR2   |
| 2.51E-23 | 0.314674682 | 0.163 | 0.321 | 4.67E-19 | 12 | SLC9A7   |
| 2.74E-23 | 0.266778891 | 0.155 | 0.343 | 5.10E-19 | 12 | CNTRL    |
| 3.37E-23 | 0.278281369 | 0.151 | 0.35  | 6.27E-19 | 12 | PDCD6IP  |
| 4.30E-23 | 0.312563529 | 0.135 | 0.271 | 8.02E-19 | 12 | GSAP     |



|          |             |       |       |          |    |                       |
|----------|-------------|-------|-------|----------|----|-----------------------|
| 5.26E-23 | 0.327489874 | 0.3   | 0.591 | 9.80E-19 | 12 | TMEM243               |
| 6.28E-23 | 0.257206112 | 0.105 | 0.248 | 1.17E-18 | 12 | JAZF1                 |
| 7.49E-23 | 0.275256552 | 0.125 | 0.286 | 1.40E-18 | 12 | RERE                  |
| 8.08E-23 | 0.306021448 | 0.157 | 0.344 | 1.51E-18 | 12 | PJA2                  |
| 1.08E-22 | 0.368080207 | 0.249 | 0.489 | 2.02E-18 | 12 | TLK1                  |
| 1.22E-22 | 0.357883154 | 0.158 | 0.35  | 2.27E-18 | 12 | TM9SF2                |
| 1.87E-22 | 0.296704679 | 0.366 | 0.712 | 3.48E-18 | 12 | CDC42                 |
| 1.93E-22 | 0.273105362 | 0.112 | 0.269 | 3.60E-18 | 12 | SLC25A32              |
| 2.24E-22 | 0.26518042  | 0.106 | 0.245 | 4.17E-18 | 12 | CAPN2                 |
| 2.32E-22 | 0.283489288 | 0.137 | 0.318 | 4.32E-18 | 12 | CNST                  |
| 2.64E-22 | 0.341179718 | 0.138 | 0.284 | 4.93E-18 | 12 | SLC12A6               |
| 2.99E-22 | 0.37493886  | 0.144 | 0.288 | 5.58E-18 | 12 | FAM208A               |
| 3.42E-22 | 0.281044534 | 0.184 | 0.391 | 6.37E-18 | 12 | LENG8                 |
| 3.55E-22 | 0.28404967  | 0.11  | 0.25  | 6.62E-18 | 12 | CTSC                  |
| 4.85E-22 | 0.255010811 | 0.108 | 0.249 | 9.04E-18 | 12 | XRN1                  |
| 5.16E-22 | 0.322277504 | 0.125 | 0.274 | 9.61E-18 | 12 | TUT7                  |
| 5.45E-22 | 0.423003426 | 0.261 | 0.496 | 1.02E-17 | 12 | LCP1                  |
| 5.76E-22 | 0.260294996 | 0.351 | 0.671 | 1.07E-17 | 12 | MBNL1                 |
| 6.04E-22 | 0.373446356 | 0.2   | 0.392 | 1.13E-17 | 12 | ZNF107                |
| 7.05E-22 | 0.430570131 | 0.163 | 0.314 | 1.31E-17 | 12 | TMPO                  |
| 9.88E-22 | 0.251387748 | 0.109 | 0.244 | 1.84E-17 | 12 | LINC02397             |
| 1.27E-21 | 0.300015594 | 0.152 | 0.328 | 2.37E-17 | 12 | BTAF1                 |
| 1.59E-21 | 0.422367717 | 0.227 | 0.458 | 2.96E-17 | 12 | PTPN2                 |
| 1.70E-21 | 0.29073638  | 0.113 | 0.244 | 3.17E-17 | 12 | LONP2                 |
| 1.97E-21 | 0.251076997 | 0.12  | 0.289 | 3.68E-17 | 12 | CAPRN1                |
| 2.48E-21 | 0.371732537 | 0.162 | 0.334 | 4.63E-17 | 12 | MATR3-ENSG00000015479 |
| 2.61E-21 | 0.266162481 | 0.119 | 0.279 | 4.86E-17 | 12 | AP1G1                 |
| 2.99E-21 | 0.311110136 | 0.249 | 0.513 | 5.58E-17 | 12 | IL4R                  |
| 3.37E-21 | 0.322848721 | 0.29  | 0.572 | 6.27E-17 | 12 | USP15                 |
| 3.83E-21 | 0.296037171 | 0.348 | 0.696 | 7.14E-17 | 12 | EPC1                  |
| 4.08E-21 | 0.321917832 | 0.175 | 0.356 | 7.60E-17 | 12 | RNF19A                |
| 5.66E-21 | 0.277237387 | 0.147 | 0.305 | 1.05E-16 | 12 | TTC14                 |
| 5.75E-21 | 0.309033695 | 0.18  | 0.355 | 1.07E-16 | 12 | HIST1H1C              |
| 6.53E-21 | 0.2775043   | 0.308 | 0.573 | 1.22E-16 | 12 | LBH                   |
| 9.96E-21 | 0.286166611 | 0.211 | 0.456 | 1.86E-16 | 12 | ARHGAP15              |
| 1.03E-20 | 0.313790568 | 0.161 | 0.341 | 1.91E-16 | 12 | SETD2                 |
| 1.38E-20 | 0.323175632 | 0.143 | 0.28  | 2.58E-16 | 12 | IMMP2L                |
| 1.83E-20 | 0.296712349 | 0.15  | 0.326 | 3.41E-16 | 12 | CCNH                  |
| 1.97E-20 | 0.28570851  | 0.15  | 0.322 | 3.67E-16 | 12 | PHC3                  |
| 2.18E-20 | 0.352413101 | 0.194 | 0.379 | 4.07E-16 | 12 | CIITA                 |
| 2.29E-20 | 0.264470803 | 0.115 | 0.236 | 4.27E-16 | 12 | AC025164.1            |
| 3.12E-20 | 0.326770739 | 0.176 | 0.385 | 5.81E-16 | 12 | CDK5RAP3              |
| 3.23E-20 | 0.349596866 | 0.252 | 0.49  | 6.03E-16 | 12 | SP110                 |
| 3.35E-20 | 0.28569976  | 0.116 | 0.272 | 6.25E-16 | 12 | MAP4K1                |
| 5.46E-20 | 0.272222028 | 0.157 | 0.333 | 1.02E-15 | 12 | LPP                   |
| 5.71E-20 | 0.346852285 | 0.197 | 0.41  | 1.07E-15 | 12 | ARHGAP17              |

|          |             |       |       |          |    |          |
|----------|-------------|-------|-------|----------|----|----------|
| 6.24E-20 | 0.292225807 | 0.338 | 0.634 | 1.16E-15 | 12 | JMJD1C   |
| 6.43E-20 | 0.312615218 | 0.159 | 0.343 | 1.20E-15 | 12 | CDC25B   |
| 9.13E-20 | 0.352583684 | 0.315 | 0.603 | 1.70E-15 | 12 | BCLAF1   |
| 9.16E-20 | 0.253874973 | 0.193 | 0.386 | 1.71E-15 | 12 | NKTR     |
| 9.32E-20 | 0.261440825 | 0.121 | 0.272 | 1.74E-15 | 12 | SIMC1    |
| 1.07E-19 | 0.303123072 | 0.143 | 0.309 | 1.99E-15 | 12 | PCMTD1   |
| 1.08E-19 | 0.255679904 | 0.121 | 0.272 | 2.01E-15 | 12 | TRAF5    |
| 1.11E-19 | 0.330702644 | 0.123 | 0.263 | 2.07E-15 | 12 | CGGBP1   |
| 1.85E-19 | 0.391283921 | 0.144 | 0.288 | 3.44E-15 | 12 | SCIMP    |
| 2.35E-19 | 0.384435971 | 0.282 | 0.544 | 4.38E-15 | 12 | N4BP2L2  |
| 2.48E-19 | 0.266747308 | 0.111 | 0.243 | 4.63E-15 | 12 | GOLGA8B  |
| 2.97E-19 | 0.338643858 | 0.18  | 0.358 | 5.54E-15 | 12 | UTRN     |
| 4.00E-19 | 0.275335674 | 0.142 | 0.302 | 7.45E-15 | 12 | ADD3     |
| 4.02E-19 | 0.316901188 | 0.134 | 0.262 | 7.50E-15 | 12 | DNAJC10  |
| 4.89E-19 | 0.31077936  | 0.361 | 0.685 | 9.12E-15 | 12 | SF3B1    |
| 5.46E-19 | 0.270821055 | 0.11  | 0.234 | 1.02E-14 | 12 | DGKD     |
| 5.62E-19 | 0.345682927 | 0.154 | 0.325 | 1.05E-14 | 12 | RBM33    |
| 6.35E-19 | 0.422773727 | 0.226 | 0.432 | 1.18E-14 | 12 | TNFAIP8  |
| 6.52E-19 | 0.319331981 | 0.135 | 0.28  | 1.21E-14 | 12 | MCOLN2   |
| 7.63E-19 | 0.439195883 | 0.2   | 0.4   | 1.42E-14 | 12 | CLINT1   |
| 9.63E-19 | 0.380100789 | 0.222 | 0.433 | 1.80E-14 | 12 | ZNF292   |
| 1.01E-18 | 0.277062612 | 0.187 | 0.358 | 1.88E-14 | 12 | TSPYL2   |
| 1.14E-18 | 0.286737306 | 0.342 | 0.683 | 2.12E-14 | 12 | CTSS     |
| 1.23E-18 | 0.329480432 | 0.313 | 0.617 | 2.29E-14 | 12 | PDIA3    |
| 1.32E-18 | 0.253484398 | 0.321 | 0.614 | 2.45E-14 | 12 | NCOA3    |
| 1.40E-18 | 0.365324183 | 0.225 | 0.422 | 2.62E-14 | 12 | ZRANB2   |
| 2.37E-18 | 0.326356139 | 0.273 | 0.549 | 4.42E-14 | 12 | HMGN3    |
| 2.57E-18 | 0.282088259 | 0.122 | 0.271 | 4.80E-14 | 12 | RBM5     |
| 3.73E-18 | 0.317095255 | 0.31  | 0.577 | 6.96E-14 | 12 | PNN      |
| 4.18E-18 | 0.260096748 | 0.088 | 0.19  | 7.78E-14 | 12 | ZMYND8   |
| 4.65E-18 | 0.284871427 | 0.312 | 0.569 | 8.66E-14 | 12 | FCRLA    |
| 5.54E-18 | 0.322969832 | 0.156 | 0.327 | 1.03E-13 | 12 | NORAD    |
| 5.68E-18 | 0.31013706  | 0.332 | 0.64  | 1.06E-13 | 12 | SRSF10   |
| 6.11E-18 | 0.389203817 | 0.225 | 0.45  | 1.14E-13 | 12 | TGOLN2   |
| 8.25E-18 | 0.342253682 | 0.151 | 0.313 | 1.54E-13 | 12 | MAP4     |
| 1.01E-17 | 0.374550392 | 0.164 | 0.334 | 1.89E-13 | 12 | DMD      |
| 1.37E-17 | 0.329186371 | 0.095 | 0.21  | 2.55E-13 | 12 | SLAMF6   |
| 1.49E-17 | 0.363325209 | 0.234 | 0.438 | 2.77E-13 | 12 | TMEM131L |
| 1.52E-17 | 0.280929453 | 0.256 | 0.478 | 2.84E-13 | 12 | BACH2    |
| 1.72E-17 | 0.250844306 | 0.085 | 0.197 | 3.20E-13 | 12 | ADAM10   |
| 2.18E-17 | 0.344397499 | 0.161 | 0.339 | 4.07E-13 | 12 | PTBP3    |
| 2.31E-17 | 0.276296238 | 0.085 | 0.194 | 4.30E-13 | 12 | ZNF217   |
| 2.47E-17 | 0.286807632 | 0.107 | 0.241 | 4.61E-13 | 12 | ANKRD49  |
| 2.84E-17 | 0.417207284 | 0.279 | 0.538 | 5.29E-13 | 12 | CD47     |
| 3.22E-17 | 0.26058131  | 0.139 | 0.291 | 5.99E-13 | 12 | RIC1     |
| 4.63E-17 | 0.436287601 | 0.203 | 0.367 | 8.63E-13 | 12 | CREB3L2  |

|          |             |       |       |          |    |            |
|----------|-------------|-------|-------|----------|----|------------|
| 5.34E-17 | 0.266842441 | 0.123 | 0.265 | 9.96E-13 | 12 | PHKB       |
| 5.59E-17 | 0.260193134 | 0.091 | 0.2   | 1.04E-12 | 12 | NUP88      |
| 5.62E-17 | 0.27581111  | 0.095 | 0.202 | 1.05E-12 | 12 | STAMBPL1   |
| 6.32E-17 | 0.274402533 | 0.097 | 0.212 | 1.18E-12 | 12 | ZAP70      |
| 6.50E-17 | 0.290021836 | 0.089 | 0.202 | 1.21E-12 | 12 | PECAM1     |
| 6.84E-17 | 0.274841055 | 0.094 | 0.207 | 1.28E-12 | 12 | NCOA7      |
| 7.36E-17 | 0.262882768 | 0.371 | 0.689 | 1.37E-12 | 12 | BLK        |
| 7.81E-17 | 0.388119272 | 0.31  | 0.539 | 1.46E-12 | 12 | BCL2       |
| 8.60E-17 | 0.396880261 | 0.2   | 0.358 | 1.60E-12 | 12 | CLNK       |
| 1.83E-16 | 0.39812143  | 0.3   | 0.581 | 3.41E-12 | 12 | DDX6       |
| 2.01E-16 | 0.300869609 | 0.34  | 0.637 | 3.74E-12 | 12 | SLC38A1    |
| 2.07E-16 | 0.335442799 | 0.391 | 0.704 | 3.85E-12 | 12 | PPIB       |
| 2.51E-16 | 0.364401107 | 0.177 | 0.33  | 4.67E-12 | 12 | TLE4       |
| 2.68E-16 | 0.287213946 | 0.094 | 0.196 | 4.99E-12 | 12 | DCLK2      |
| 3.18E-16 | 0.368016752 | 0.146 | 0.288 | 5.92E-12 | 12 | CLEC17A    |
| 3.55E-16 | 0.46345605  | 0.231 | 0.433 | 6.61E-12 | 12 | SP140      |
| 6.24E-16 | 0.305116914 | 0.267 | 0.539 | 1.16E-11 | 12 | LUC7L3     |
| 6.87E-16 | 0.262128109 | 0.153 | 0.305 | 1.28E-11 | 12 | ARL4C      |
| 1.13E-15 | 0.387508112 | 0.174 | 0.299 | 2.11E-11 | 12 | RNPC3      |
| 2.30E-15 | 0.416588066 | 0.253 | 0.484 | 4.29E-11 | 12 | PCM1       |
| 3.31E-15 | 0.406677779 | 0.228 | 0.431 | 6.18E-11 | 12 | SNX29      |
| 3.42E-15 | 0.268884902 | 0.303 | 0.556 | 6.37E-11 | 12 | CD79B      |
| 5.85E-15 | 0.334469904 | 0.195 | 0.372 | 1.09E-10 | 12 | MDM4       |
| 6.62E-15 | 0.311128962 | 0.298 | 0.542 | 1.23E-10 | 12 | ADTRP      |
| 8.08E-15 | 0.259404885 | 0.108 | 0.227 | 1.51E-10 | 12 | CREBZF     |
| 1.40E-14 | 0.336433585 | 0.343 | 0.653 | 2.62E-10 | 12 | SP100      |
| 2.67E-14 | 0.332384398 | 0.251 | 0.461 | 4.98E-10 | 12 | AC004687.1 |
| 6.04E-14 | 0.301908305 | 0.119 | 0.234 | 1.13E-09 | 12 | EXOC4      |
| 1.09E-13 | 0.26710153  | 0.124 | 0.241 | 2.03E-09 | 12 | ADAM19     |
| 1.10E-13 | 0.365683103 | 0.374 | 0.691 | 2.04E-09 | 12 | SEC62      |
| 1.12E-13 | 0.274592597 | 0.111 | 0.237 | 2.09E-09 | 12 | DMTF1      |
| 1.60E-13 | 0.393100742 | 0.153 | 0.301 | 2.98E-09 | 12 | PHTF2      |
| 3.40E-13 | 0.416126216 | 0.326 | 0.574 | 6.34E-09 | 12 | G3BP2      |
| 3.57E-13 | 0.296897168 | 0.121 | 0.235 | 6.65E-09 | 12 | MRNIP      |
| 4.65E-13 | 0.352164166 | 0.255 | 0.481 | 8.66E-09 | 12 | OGA        |
| 4.88E-13 | 0.338416336 | 0.134 | 0.249 | 9.09E-09 | 12 | CD84       |
| 5.32E-13 | 0.26529578  | 0.093 | 0.194 | 9.92E-09 | 12 | MAP3K14    |
| 6.21E-13 | 0.355867314 | 0.151 | 0.278 | 1.16E-08 | 12 | RNASEH2B   |
| 6.56E-13 | 0.252639147 | 0.415 | 0.742 | 1.22E-08 | 12 | SRSF5      |
| 1.17E-12 | 0.311833359 | 0.129 | 0.251 | 2.18E-08 | 12 | SLC23A2    |
| 1.23E-12 | 0.373386627 | 0.179 | 0.34  | 2.29E-08 | 12 | SPTBN1     |
| 1.46E-12 | 0.279515451 | 0.226 | 0.444 | 2.73E-08 | 12 | CLK1       |
| 1.60E-12 | 0.289435609 | 0.12  | 0.225 | 2.97E-08 | 12 | GAB1       |
| 1.78E-12 | 0.353997134 | 0.142 | 0.259 | 3.31E-08 | 12 | TNFAIP3    |
| 2.34E-12 | 0.255861208 | 0.164 | 0.326 | 4.37E-08 | 12 | MZB1       |
| 3.11E-12 | 0.420160066 | 0.224 | 0.424 | 5.79E-08 | 12 | PHF3       |

|          |             |       |       |             |    |            |
|----------|-------------|-------|-------|-------------|----|------------|
| 3.95E-12 | 0.413337002 | 0.163 | 0.302 | 7.36E-08    | 12 | NSF        |
| 5.74E-12 | 0.391111208 | 0.288 | 0.514 | 1.07E-07    | 12 | MEF2C      |
| 8.46E-12 | 0.398242765 | 0.266 | 0.476 | 1.58E-07    | 12 | TUT4       |
| 1.01E-11 | 0.361379418 | 0.807 | 0.95  | 1.88E-07    | 12 | DDX5       |
| 1.40E-11 | 0.47447926  | 0.699 | 0.844 | 2.62E-07    | 12 | FCMR       |
| 2.31E-11 | 0.308277113 | 0.197 | 0.357 | 4.30E-07    | 12 | GABPB1-AS1 |
| 2.33E-11 | 0.419519187 | 0.193 | 0.332 | 4.35E-07    | 12 | DOCK10     |
| 4.77E-11 | 0.364476486 | 0.138 | 0.28  | 8.89E-07    | 12 | LHPP       |
| 6.01E-11 | 0.425898749 | 0.272 | 0.48  | 1.12E-06    | 12 | ITGB1      |
| 7.44E-11 | 0.286091641 | 0.201 | 0.358 | 1.39E-06    | 12 | PHACTR1    |
| 1.05E-10 | 0.415812724 | 0.202 | 0.347 | 1.95E-06    | 12 | MCTP2      |
| 1.67E-10 | 0.348391416 | 0.104 | 0.205 | 3.10E-06    | 12 | TGFBR3     |
| 3.24E-10 | 0.448592098 | 0.161 | 0.266 | 6.03E-06    | 12 | BTLA       |
| 3.98E-10 | 0.489838353 | 0.171 | 0.294 | 7.42E-06    | 12 | ZNF266     |
| 4.59E-10 | 0.267386275 | 0.119 | 0.226 | 8.55E-06    | 12 | AC119396.1 |
| 5.33E-10 | 0.299740332 | 0.328 | 0.561 | 9.94E-06    | 12 | PELI1      |
| 8.22E-10 | 0.378222141 | 0.142 | 0.26  | 1.53E-05    | 12 | LYST       |
| 1.13E-09 | 0.288942486 | 0.381 | 0.635 | 2.12E-05    | 12 | HSP90B1    |
| 2.66E-09 | 0.436806178 | 0.24  | 0.404 | 4.96E-05    | 12 | SKAP1      |
| 3.82E-09 | 0.487322889 | 0.205 | 0.355 | 7.12E-05    | 12 | LEF1       |
| 5.81E-09 | 0.3394301   | 0.452 | 0.777 | 0.000108374 | 12 | Sep-07     |
| 6.67E-09 | 0.464725639 | 0.271 | 0.469 | 0.000124408 | 12 | VPS13C     |
| 7.77E-09 | 0.354034374 | 0.406 | 0.705 | 0.000144893 | 12 | HNRNPU     |
| 1.55E-08 | 0.438337304 | 0.173 | 0.317 | 0.000288571 | 12 | CD46       |
| 1.92E-08 | 0.422640658 | 0.377 | 0.634 | 0.000357343 | 12 | RCSD1      |
| 4.97E-08 | 0.480982987 | 0.167 | 0.283 | 0.00092607  | 12 | METTL7A    |
| 8.70E-08 | 0.370874042 | 0.227 | 0.368 | 0.001621745 | 12 | CAMK2D     |
| 1.12E-07 | 0.795079009 | 0.47  | 0.753 | 0.002088062 | 12 | MT-ND6     |
| 1.25E-07 | 0.426395607 | 0.312 | 0.503 | 0.002338163 | 12 | INPP5F     |
| 2.33E-07 | 0.251591868 | 0.489 | 0.831 | 0.004341808 | 12 | SRP14      |
| 6.45E-07 | 0.262987613 | 0.407 | 0.647 | 0.012024413 | 12 | CCDC88A    |
| 2.47E-06 | 0.29929206  | 0.717 | 0.88  | 0.045998865 | 12 | HSP90AB1   |
| 5.35E-06 | 0.289790258 | 0.479 | 0.781 | 0.099798918 | 12 | VOPP1      |
| 5.62E-06 | 0.340894973 | 0.466 | 0.8   | 0.104764777 | 12 | GRB2       |
| 5.73E-06 | 0.428385156 | 0.348 | 0.559 | 0.106861394 | 12 | HSPA5      |
| 6.22E-06 | 0.425963019 | 0.332 | 0.541 | 0.115868847 | 12 | STX7       |
| 6.27E-06 | 0.445089562 | 0.403 | 0.672 | 0.116861671 | 12 | ARGLU1     |
| 6.34E-06 | 0.454089138 | 0.198 | 0.312 | 0.118171172 | 12 | AC020916.1 |
| 7.11E-06 | 0.304462381 | 0.446 | 0.722 | 0.13252313  | 12 | SMCHD1     |
| 9.59E-06 | 0.409150334 | 0.663 | 0.874 | 0.178688701 | 12 | FOXP1      |
| 1.08E-05 | 0.353552    | 0.396 | 0.646 | 0.201977603 | 12 | RUBCNL     |
| 1.45E-05 | 0.480677458 | 0.332 | 0.573 | 0.269854244 | 12 | IFT57      |
| 1.70E-05 | 0.472636415 | 0.325 | 0.523 | 0.317288989 | 12 | OGT        |
| 1.96E-05 | 0.464673735 | 0.354 | 0.574 | 0.365376522 | 12 | IKZF3      |
| 7.67E-05 | 0.284240818 | 0.51  | 0.81  | 1           | 12 | ATP5MC2    |
| 8.60E-05 | 0.349817415 | 0.458 | 0.759 | 1           | 12 | Sep-09     |

|             |             |       |       |           |    |            |
|-------------|-------------|-------|-------|-----------|----|------------|
| 0.000201257 | 0.34010755  | 0.461 | 0.745 | 1         | 12 | PNISR      |
| 0.000916464 | 0.424978712 | 0.588 | 0.819 | 1         | 12 | PTPRC      |
| 0.001007284 | 0.303732699 | 0.527 | 0.85  | 1         | 12 | SON        |
| 0.001205448 | 0.461503526 | 0.392 | 0.594 | 1         | 12 | ABCA6      |
| 0.004192802 | 0.460636816 | 0.588 | 0.829 | 1         | 12 | PNRC1      |
| 0.008249904 | 0.482749111 | 0.419 | 0.64  | 1         | 12 | RIPOR2     |
| 8.90E-295   | 1.604653652 | 0.869 | 0.757 | 1.66E-290 | 13 | RALGPS2    |
| 7.68E-201   | 1.365963629 | 0.796 | 0.685 | 1.43E-196 | 13 | DDX17      |
| 2.31E-75    | 1.178674227 | 0.52  | 0.407 | 4.31E-71  | 13 | PARP15     |
| 6.21E-49    | 0.7261215   | 0.701 | 0.82  | 1.16E-44  | 13 | RBM39      |
| 8.11E-49    | 0.761531733 | 0.736 | 0.842 | 1.51E-44  | 13 | TCF4       |
| 2.70E-31    | 1.045133907 | 0.349 | 0.246 | 5.03E-27  | 13 | AC007952.4 |
| 8.85E-31    | 0.269230035 | 0.194 | 0.416 | 1.65E-26  | 13 | PPP2R5C    |
| 2.32E-29    | 0.268527117 | 0.161 | 0.337 | 4.32E-25  | 13 | HSD17B11   |
| 5.42E-29    | 0.282358274 | 0.19  | 0.4   | 1.01E-24  | 13 | DUT        |
| 6.02E-29    | 0.285894251 | 0.182 | 0.398 | 1.12E-24  | 13 | MED10      |
| 6.99E-28    | 0.275568209 | 0.176 | 0.386 | 1.30E-23  | 13 | FAM133B    |
| 1.56E-27    | 0.297886173 | 0.221 | 0.463 | 2.90E-23  | 13 | RBM17      |
| 2.09E-27    | 0.261562201 | 0.177 | 0.376 | 3.90E-23  | 13 | RIN3       |
| 1.45E-26    | 0.255700087 | 0.181 | 0.404 | 2.70E-22  | 13 | SNX6       |
| 1.70E-26    | 0.273945435 | 0.137 | 0.285 | 3.16E-22  | 13 | SNX5       |
| 6.02E-26    | 1.135912268 | 0.212 | 0.106 | 1.12E-21  | 13 | XIST       |
| 8.60E-26    | 0.270307907 | 0.186 | 0.394 | 1.60E-21  | 13 | BCAS4      |
| 1.02E-25    | 0.268644336 | 0.138 | 0.302 | 1.91E-21  | 13 | PABPN1     |
| 1.30E-25    | 0.825174528 | 0.208 | 0.103 | 2.41E-21  | 13 | TRIM73     |
| 5.87E-25    | 0.251910768 | 0.152 | 0.334 | 1.10E-20  | 13 | HERPUD2    |
| 1.13E-24    | 0.267663686 | 0.174 | 0.36  | 2.10E-20  | 13 | DRAM2      |
| 2.07E-24    | 0.32191021  | 0.151 | 0.304 | 3.86E-20  | 13 | ATG12      |
| 3.36E-24    | 0.266200023 | 0.164 | 0.363 | 6.25E-20  | 13 | YY1        |
| 9.37E-24    | 0.265414585 | 0.184 | 0.395 | 1.75E-19  | 13 | DNAJC15    |
| 9.53E-24    | 0.284711316 | 0.155 | 0.332 | 1.78E-19  | 13 | SUMF2      |
| 9.87E-24    | 0.25935414  | 0.255 | 0.52  | 1.84E-19  | 13 | HNRNPR     |
| 1.21E-23    | 0.319436243 | 0.207 | 0.415 | 2.26E-19  | 13 | RNF10      |
| 1.80E-23    | 0.258625972 | 0.172 | 0.375 | 3.36E-19  | 13 | MTCH1      |
| 1.98E-23    | 0.293626602 | 0.178 | 0.378 | 3.70E-19  | 13 | FAM49B     |
| 2.03E-23    | 0.250685555 | 0.18  | 0.388 | 3.79E-19  | 13 | RTF1       |
| 2.55E-23    | 0.337152682 | 0.181 | 0.369 | 4.76E-19  | 13 | RASGRP2    |
| 3.37E-23    | 0.329423083 | 0.241 | 0.49  | 6.28E-19  | 13 | ARHGAP45   |
| 4.34E-23    | 0.277743649 | 0.219 | 0.447 | 8.08E-19  | 13 | MCUB       |
| 8.98E-23    | 0.869540101 | 0.559 | 0.664 | 1.67E-18  | 13 | MBNL1      |
| 1.11E-22    | 0.292470909 | 0.189 | 0.4   | 2.08E-18  | 13 | EAPP       |
| 1.24E-22    | 0.280462127 | 0.161 | 0.327 | 2.31E-18  | 13 | UBQLN1     |
| 1.37E-22    | 0.292938659 | 0.13  | 0.277 | 2.56E-18  | 13 | EPRS       |
| 1.77E-22    | 0.257107605 | 0.211 | 0.433 | 3.30E-18  | 13 | SYPL1      |
| 1.81E-22    | 0.288043034 | 0.151 | 0.315 | 3.37E-18  | 13 | MAP3K2     |
| 2.62E-22    | 0.260501089 | 0.135 | 0.298 | 4.88E-18  | 13 | COPB1      |

|          |             |       |       |          |    |          |
|----------|-------------|-------|-------|----------|----|----------|
| 2.92E-22 | 0.259660198 | 0.12  | 0.261 | 5.45E-18 | 13 | GPBP1L1  |
| 7.63E-22 | 0.260801338 | 0.135 | 0.291 | 1.42E-17 | 13 | RNF4     |
| 9.96E-22 | 0.266873247 | 0.143 | 0.302 | 1.86E-17 | 13 | IST1     |
| 1.71E-21 | 0.250908887 | 0.273 | 0.549 | 3.18E-17 | 13 | CDC42SE1 |
| 2.87E-21 | 0.254951766 | 0.189 | 0.379 | 5.36E-17 | 13 | KDM2A    |
| 3.35E-21 | 0.285187409 | 0.248 | 0.502 | 6.25E-17 | 13 | STARD7   |
| 3.47E-21 | 0.252600426 | 0.105 | 0.249 | 6.47E-17 | 13 | DNM2     |
| 5.64E-21 | 0.256489738 | 0.25  | 0.49  | 1.05E-16 | 13 | B4GALT1  |
| 5.69E-21 | 0.266401038 | 0.12  | 0.263 | 1.06E-16 | 13 | CCM2     |
| 1.33E-20 | 0.252755674 | 0.138 | 0.292 | 2.48E-16 | 13 | COMMD1   |
| 2.41E-20 | 0.269286586 | 0.101 | 0.21  | 4.49E-16 | 13 | MRPS5    |
| 2.87E-20 | 0.279683959 | 0.187 | 0.392 | 5.35E-16 | 13 | RAB2A    |
| 2.93E-20 | 0.332150444 | 0.212 | 0.416 | 5.47E-16 | 13 | GSTK1    |
| 3.03E-20 | 0.279935412 | 0.177 | 0.363 | 5.65E-16 | 13 | VPS35    |
| 3.29E-20 | 0.28262933  | 0.152 | 0.313 | 6.12E-16 | 13 | SND1     |
| 3.40E-20 | 0.284926754 | 0.215 | 0.438 | 6.33E-16 | 13 | STK17A   |
| 4.86E-20 | 0.256142276 | 0.235 | 0.511 | 9.06E-16 | 13 | SYF2     |
| 5.72E-20 | 0.332419051 | 0.225 | 0.447 | 1.07E-15 | 13 | STAT6    |
| 5.96E-20 | 0.320892393 | 0.316 | 0.578 | 1.11E-15 | 13 | MTPN     |
| 7.62E-20 | 0.274031526 | 0.158 | 0.331 | 1.42E-15 | 13 | RAB14    |
| 1.22E-19 | 0.290625187 | 0.234 | 0.47  | 2.27E-15 | 13 | LTA4H    |
| 2.18E-19 | 0.279019927 | 0.145 | 0.311 | 4.07E-15 | 13 | ASAH1    |
| 2.19E-19 | 0.292244986 | 0.173 | 0.361 | 4.09E-15 | 13 | ZFR      |
| 2.97E-19 | 0.307384806 | 0.194 | 0.407 | 5.54E-15 | 13 | DPP7     |
| 3.41E-19 | 0.26257032  | 0.128 | 0.249 | 6.36E-15 | 13 | TGS1     |
| 5.95E-19 | 0.253039278 | 0.166 | 0.344 | 1.11E-14 | 13 | DHX9     |
| 6.12E-19 | 0.27007577  | 0.137 | 0.302 | 1.14E-14 | 13 | RAB10    |
| 6.71E-19 | 0.263524382 | 0.179 | 0.369 | 1.25E-14 | 13 | SPTAN1   |
| 6.91E-19 | 0.255937453 | 0.123 | 0.26  | 1.29E-14 | 13 | PDPK1    |
| 7.81E-19 | 0.265772847 | 0.221 | 0.446 | 1.46E-14 | 13 | PARP1    |
| 8.65E-19 | 0.270055511 | 0.192 | 0.405 | 1.61E-14 | 13 | CANX     |
| 1.13E-18 | 0.332494318 | 0.213 | 0.405 | 2.10E-14 | 13 | RNMT     |
| 1.25E-18 | 0.292925688 | 0.244 | 0.478 | 2.33E-14 | 13 | RAD21    |
| 1.40E-18 | 0.294505706 | 0.206 | 0.416 | 2.61E-14 | 13 | RBBP6    |
| 1.42E-18 | 0.268517892 | 0.13  | 0.27  | 2.64E-14 | 13 | GRSF1    |
| 1.43E-18 | 0.31609154  | 0.164 | 0.324 | 2.67E-14 | 13 | SMARCE1  |
| 1.60E-18 | 0.322890191 | 0.227 | 0.434 | 2.98E-14 | 13 | CSNK1A1  |
| 1.71E-18 | 0.289733874 | 0.104 | 0.218 | 3.19E-14 | 13 | CCDC186  |
| 2.09E-18 | 0.329007    | 0.228 | 0.434 | 3.90E-14 | 13 | FGR      |
| 2.20E-18 | 0.290495637 | 0.162 | 0.323 | 4.09E-14 | 13 | RBBP7    |
| 2.28E-18 | 0.32317947  | 0.201 | 0.401 | 4.25E-14 | 13 | DDX46    |
| 2.46E-18 | 0.348176665 | 0.167 | 0.307 | 4.59E-14 | 13 | SDHA     |
| 3.18E-18 | 0.399743957 | 0.281 | 0.513 | 5.93E-14 | 13 | PAPOLA   |
| 3.52E-18 | 0.340215912 | 0.216 | 0.426 | 6.55E-14 | 13 | ARPC5    |
| 3.54E-18 | 0.726041093 | 0.534 | 0.658 | 6.60E-14 | 13 | SRSF11   |
| 4.51E-18 | 0.26432389  | 0.142 | 0.3   | 8.40E-14 | 13 | LYPLA1   |

|          |             |       |       |          |    |          |
|----------|-------------|-------|-------|----------|----|----------|
| 4.67E-18 | 0.274293356 | 0.131 | 0.259 | 8.70E-14 | 13 | EFCAB14  |
| 7.17E-18 | 0.266254708 | 0.114 | 0.232 | 1.34E-13 | 13 | LMBR1L   |
| 7.26E-18 | 0.292877192 | 0.151 | 0.287 | 1.35E-13 | 13 | SCIMP    |
| 8.15E-18 | 0.268860993 | 0.117 | 0.239 | 1.52E-13 | 13 | DCAF11   |
| 9.03E-18 | 0.358633149 | 0.812 | 0.95  | 1.68E-13 | 13 | DDX5     |
| 9.86E-18 | 0.325448141 | 0.173 | 0.341 | 1.84E-13 | 13 | CCDC32   |
| 1.05E-17 | 0.32032334  | 0.211 | 0.413 | 1.96E-13 | 13 | ANKRD11  |
| 1.07E-17 | 0.27139102  | 0.125 | 0.257 | 2.00E-13 | 13 | TFEB     |
| 1.19E-17 | 0.302438353 | 0.158 | 0.33  | 2.22E-13 | 13 | UBTF     |
| 1.23E-17 | 0.32152658  | 0.188 | 0.371 | 2.28E-13 | 13 | CEBPZ    |
| 1.41E-17 | 0.327543613 | 0.16  | 0.316 | 2.63E-13 | 13 | HADHB    |
| 1.58E-17 | 0.347069425 | 0.181 | 0.374 | 2.94E-13 | 13 | SUPT5H   |
| 2.00E-17 | 0.276019987 | 0.138 | 0.281 | 3.73E-13 | 13 | RBPJ     |
| 2.22E-17 | 0.296846991 | 0.233 | 0.42  | 4.15E-13 | 13 | PLEKHA2  |
| 2.91E-17 | 0.33467713  | 0.247 | 0.469 | 5.42E-13 | 13 | LSM14A   |
| 3.35E-17 | 0.769555986 | 0.555 | 0.678 | 6.24E-13 | 13 | SF3B1    |
| 3.66E-17 | 0.334210541 | 0.214 | 0.413 | 6.83E-13 | 13 | HSPA4    |
| 3.93E-17 | 0.327778073 | 0.181 | 0.353 | 7.32E-13 | 13 | ADPGK    |
| 4.01E-17 | 0.275070211 | 0.146 | 0.29  | 7.48E-13 | 13 | MFF      |
| 4.04E-17 | 0.285244823 | 0.155 | 0.302 | 7.54E-13 | 13 | PIK3IP1  |
| 4.05E-17 | 0.320701656 | 0.246 | 0.479 | 7.55E-13 | 13 | PRPF40A  |
| 5.23E-17 | 0.323130222 | 0.184 | 0.349 | 9.74E-13 | 13 | TM9SF2   |
| 5.34E-17 | 0.33282558  | 0.132 | 0.267 | 9.96E-13 | 13 | MICAL1   |
| 6.89E-17 | 0.315906761 | 0.118 | 0.223 | 1.28E-12 | 13 | ANKRD17  |
| 7.46E-17 | 0.253144435 | 0.107 | 0.224 | 1.39E-12 | 13 | RMC1     |
| 7.95E-17 | 0.29801176  | 0.155 | 0.306 | 1.48E-12 | 13 | HPS1     |
| 8.17E-17 | 0.265921172 | 0.162 | 0.336 | 1.52E-12 | 13 | TMF1     |
| 8.64E-17 | 0.376551132 | 0.212 | 0.385 | 1.61E-12 | 13 | HIVEP1   |
| 8.90E-17 | 0.324269491 | 0.154 | 0.293 | 1.66E-12 | 13 | EIF2AK1  |
| 8.99E-17 | 0.336745387 | 0.205 | 0.386 | 1.67E-12 | 13 | BAZ1A    |
| 9.44E-17 | 0.31261941  | 0.274 | 0.542 | 1.76E-12 | 13 | RBMX     |
| 1.03E-16 | 0.291868243 | 0.28  | 0.564 | 1.92E-12 | 13 | C11orf58 |
| 1.18E-16 | 0.348440524 | 0.328 | 0.578 | 2.21E-12 | 13 | TAF1D    |
| 1.28E-16 | 0.278722979 | 0.112 | 0.221 | 2.39E-12 | 13 | ESCO1    |
| 1.36E-16 | 0.280826317 | 0.153 | 0.309 | 2.53E-12 | 13 | RAB6A    |
| 1.52E-16 | 0.775075688 | 0.547 | 0.667 | 2.84E-12 | 13 | ARGLU1   |
| 1.85E-16 | 0.324013798 | 0.203 | 0.383 | 3.45E-12 | 13 | NUCKS1   |
| 1.88E-16 | 0.304916154 | 0.167 | 0.333 | 3.50E-12 | 13 | SAFB2    |
| 1.91E-16 | 0.286388051 | 0.138 | 0.272 | 3.56E-12 | 13 | SNAP23   |
| 2.16E-16 | 0.362005454 | 0.186 | 0.362 | 4.03E-12 | 13 | PTPN7    |
| 2.32E-16 | 0.264261471 | 0.2   | 0.375 | 4.33E-12 | 13 | ELF2     |
| 2.38E-16 | 0.347959918 | 0.181 | 0.333 | 4.43E-12 | 13 | CYBC1    |
| 2.41E-16 | 0.288120473 | 0.118 | 0.236 | 4.50E-12 | 13 | ILKAP    |
| 2.82E-16 | 0.266437997 | 0.392 | 0.703 | 5.26E-12 | 13 | CSDE1    |
| 2.99E-16 | 0.250287069 | 0.125 | 0.247 | 5.57E-12 | 13 | DBF4     |
| 3.44E-16 | 0.302124832 | 0.132 | 0.263 | 6.42E-12 | 13 | ADH5     |

|          |             |       |       |          |    |         |
|----------|-------------|-------|-------|----------|----|---------|
| 3.70E-16 | 0.348791355 | 0.12  | 0.243 | 6.90E-12 | 13 | NKAP    |
| 3.76E-16 | 0.280288062 | 0.208 | 0.387 | 7.01E-12 | 13 | CCDC191 |
| 3.88E-16 | 0.279344577 | 0.136 | 0.29  | 7.24E-12 | 13 | SRP54   |
| 3.90E-16 | 0.316071138 | 0.19  | 0.379 | 7.26E-12 | 13 | TMC6    |
| 5.11E-16 | 0.401359006 | 0.233 | 0.414 | 9.53E-12 | 13 | YTHDC1  |
| 5.43E-16 | 0.368673567 | 0.198 | 0.371 | 1.01E-11 | 13 | DDX18   |
| 5.49E-16 | 0.252690491 | 0.141 | 0.296 | 1.02E-11 | 13 | WASHC1  |
| 5.84E-16 | 0.261667902 | 0.12  | 0.246 | 1.09E-11 | 13 | USP10   |
| 6.77E-16 | 0.269734414 | 0.142 | 0.281 | 1.26E-11 | 13 | CEP57   |
| 8.51E-16 | 0.271599522 | 0.162 | 0.32  | 1.59E-11 | 13 | VMP1    |
| 1.06E-15 | 0.290677933 | 0.131 | 0.249 | 1.98E-11 | 13 | CDK17   |
| 1.19E-15 | 0.263013492 | 0.113 | 0.232 | 2.22E-11 | 13 | ADSS    |
| 1.26E-15 | 0.299081324 | 0.148 | 0.301 | 2.34E-11 | 13 | MECP2   |
| 1.40E-15 | 0.37009306  | 0.245 | 0.455 | 2.62E-11 | 13 | BNIP2   |
| 1.43E-15 | 0.326173013 | 0.263 | 0.493 | 2.67E-11 | 13 | HNRNPH3 |
| 1.61E-15 | 0.322140928 | 0.156 | 0.298 | 3.00E-11 | 13 | REV3L   |
| 1.65E-15 | 0.274127542 | 0.123 | 0.26  | 3.07E-11 | 13 | LARP7   |
| 2.16E-15 | 0.312903237 | 0.157 | 0.31  | 4.03E-11 | 13 | UBR4    |
| 2.78E-15 | 0.341846242 | 0.16  | 0.303 | 5.18E-11 | 13 | SSR1    |
| 2.98E-15 | 0.293228828 | 0.212 | 0.4   | 5.55E-11 | 13 | G3BP1   |
| 3.13E-15 | 0.279942546 | 0.102 | 0.204 | 5.84E-11 | 13 | GNPTG   |
| 3.24E-15 | 0.330481653 | 0.217 | 0.423 | 6.04E-11 | 13 | TRAM1   |
| 3.31E-15 | 0.339877214 | 0.289 | 0.546 | 6.17E-11 | 13 | HP1BP3  |
| 3.53E-15 | 0.283766143 | 0.12  | 0.238 | 6.58E-11 | 13 | EIF4A1  |
| 4.33E-15 | 0.287752736 | 0.133 | 0.264 | 8.07E-11 | 13 | HM13    |
| 5.44E-15 | 0.759693776 | 0.503 | 0.635 | 1.01E-10 | 13 | SRSF10  |
| 5.51E-15 | 0.252130041 | 0.127 | 0.266 | 1.03E-10 | 13 | BCCIP   |
| 5.69E-15 | 0.309705612 | 0.13  | 0.262 | 1.06E-10 | 13 | RABEP1  |
| 5.81E-15 | 0.302997968 | 0.136 | 0.262 | 1.08E-10 | 13 | CARS2   |
| 5.88E-15 | 0.279034601 | 0.221 | 0.429 | 1.10E-10 | 13 | UBE2J1  |
| 6.58E-15 | 0.350717573 | 0.145 | 0.277 | 1.23E-10 | 13 | DEF6    |
| 7.10E-15 | 0.290404507 | 0.115 | 0.235 | 1.32E-10 | 13 | PHTF1   |
| 8.05E-15 | 0.252231481 | 0.101 | 0.208 | 1.50E-10 | 13 | PSMD1   |
| 8.26E-15 | 0.317319039 | 0.146 | 0.283 | 1.54E-10 | 13 | FOXN3   |
| 8.32E-15 | 0.321643301 | 0.265 | 0.481 | 1.55E-10 | 13 | HVCN1   |
| 9.14E-15 | 0.276757777 | 0.127 | 0.252 | 1.70E-10 | 13 | CREBBP  |
| 9.15E-15 | 0.266815527 | 0.113 | 0.224 | 1.71E-10 | 13 | ZNF274  |
| 9.30E-15 | 0.342546876 | 0.209 | 0.379 | 1.73E-10 | 13 | GNPTAB  |
| 1.02E-14 | 0.340049725 | 0.254 | 0.469 | 1.90E-10 | 13 | CAPZA1  |
| 1.09E-14 | 0.326451806 | 0.186 | 0.358 | 2.03E-10 | 13 | NUMA1   |
| 1.13E-14 | 0.252102888 | 0.107 | 0.217 | 2.10E-10 | 13 | ZNF106  |
| 1.18E-14 | 0.296504218 | 0.136 | 0.249 | 2.19E-10 | 13 | CTSC    |
| 1.21E-14 | 0.330267498 | 0.181 | 0.36  | 2.26E-10 | 13 | SH3GLB1 |
| 1.30E-14 | 0.299680577 | 0.299 | 0.535 | 2.42E-10 | 13 | ST6GAL1 |
| 1.38E-14 | 0.393054126 | 0.163 | 0.304 | 2.56E-10 | 13 | DNMBP   |
| 1.45E-14 | 0.322616348 | 0.181 | 0.345 | 2.70E-10 | 13 | NFX1    |



|          |             |       |       |          |    |          |
|----------|-------------|-------|-------|----------|----|----------|
| 1.55E-14 | 0.301280775 | 0.167 | 0.334 | 2.88E-10 | 13 | PMPCB    |
| 1.57E-14 | 0.280175632 | 0.131 | 0.264 | 2.92E-10 | 13 | CCDC91   |
| 1.63E-14 | 0.359639355 | 0.166 | 0.306 | 3.03E-10 | 13 | TROVE2   |
| 1.81E-14 | 0.323348443 | 0.178 | 0.329 | 3.38E-10 | 13 | OSBPL8   |
| 2.53E-14 | 0.618823135 | 0.601 | 0.795 | 4.72E-10 | 13 | GRB2     |
| 3.71E-14 | 0.340944545 | 0.152 | 0.273 | 6.91E-10 | 13 | SMARCC1  |
| 3.72E-14 | 0.319450947 | 0.183 | 0.354 | 6.93E-10 | 13 | STK10    |
| 3.78E-14 | 0.326474234 | 0.183 | 0.36  | 7.05E-10 | 13 | PRMT2    |
| 4.16E-14 | 0.300847666 | 0.136 | 0.269 | 7.75E-10 | 13 | MYO1G    |
| 4.49E-14 | 0.258740957 | 0.098 | 0.2   | 8.37E-10 | 13 | USP7     |
| 4.63E-14 | 0.345156196 | 0.232 | 0.442 | 8.64E-10 | 13 | RTN4     |
| 4.82E-14 | 0.255652954 | 0.149 | 0.313 | 8.99E-10 | 13 | TMED5    |
| 5.38E-14 | 0.256467177 | 0.132 | 0.257 | 1.00E-09 | 13 | TRPC4AP  |
| 5.79E-14 | 0.26976902  | 0.118 | 0.243 | 1.08E-09 | 13 | LYRM2    |
| 6.06E-14 | 0.280577952 | 0.155 | 0.311 | 1.13E-09 | 13 | SYNCRIP  |
| 7.25E-14 | 0.354271402 | 0.16  | 0.295 | 1.35E-09 | 13 | WNK1     |
| 7.63E-14 | 0.295590731 | 0.315 | 0.586 | 1.42E-09 | 13 | VCP      |
| 8.15E-14 | 0.355057512 | 0.26  | 0.454 | 1.52E-09 | 13 | CD19     |
| 9.00E-14 | 0.31457824  | 0.125 | 0.238 | 1.68E-09 | 13 | SDR39U1  |
| 1.23E-13 | 0.301578728 | 0.198 | 0.389 | 2.30E-09 | 13 | UPF3A    |
| 1.63E-13 | 0.281656827 | 0.123 | 0.227 | 3.04E-09 | 13 | EFR3A    |
| 2.10E-13 | 0.311744649 | 0.137 | 0.27  | 3.92E-09 | 13 | BCL10    |
| 2.16E-13 | 0.255898637 | 0.097 | 0.206 | 4.02E-09 | 13 | NUDT5    |
| 2.17E-13 | 0.443640369 | 0.258 | 0.453 | 4.04E-09 | 13 | USP16    |
| 2.19E-13 | 0.309499485 | 0.191 | 0.347 | 4.08E-09 | 13 | PPP1R10  |
| 2.46E-13 | 0.345342538 | 0.246 | 0.461 | 4.58E-09 | 13 | SLTM     |
| 2.67E-13 | 0.308337435 | 0.169 | 0.305 | 4.98E-09 | 13 | ARL4C    |
| 2.75E-13 | 0.30866343  | 0.141 | 0.276 | 5.13E-09 | 13 | PHF20L1  |
| 2.78E-13 | 0.446977204 | 0.263 | 0.46  | 5.17E-09 | 13 | RSF1     |
| 3.03E-13 | 0.349442458 | 0.295 | 0.536 | 5.65E-09 | 13 | CDC42SE2 |
| 3.40E-13 | 0.269873097 | 0.19  | 0.374 | 6.34E-09 | 13 | ANXA6    |
| 4.16E-13 | 0.324922455 | 0.132 | 0.257 | 7.76E-09 | 13 | OSGEP    |
| 4.35E-13 | 0.25724268  | 0.095 | 0.198 | 8.10E-09 | 13 | YARS     |
| 4.95E-13 | 0.312059722 | 0.327 | 0.584 | 9.22E-09 | 13 | PDCD4    |
| 5.87E-13 | 0.252377679 | 0.099 | 0.202 | 1.10E-08 | 13 | NOL11    |
| 6.16E-13 | 0.361277268 | 0.156 | 0.289 | 1.15E-08 | 13 | SPSB3    |
| 7.76E-13 | 0.342887782 | 0.134 | 0.244 | 1.45E-08 | 13 | MYO9B    |
| 8.22E-13 | 0.378414531 | 0.174 | 0.311 | 1.53E-08 | 13 | PPP4R3A  |
| 8.46E-13 | 0.33120546  | 0.35  | 0.616 | 1.58E-08 | 13 | PDIA3    |
| 9.47E-13 | 0.318307061 | 0.125 | 0.234 | 1.76E-08 | 13 | TUBGCP2  |
| 1.02E-12 | 0.291168291 | 0.118 | 0.235 | 1.91E-08 | 13 | FAM53B   |
| 1.04E-12 | 0.34552843  | 0.139 | 0.244 | 1.94E-08 | 13 | RNF13    |
| 1.11E-12 | 0.380137043 | 0.169 | 0.294 | 2.06E-08 | 13 | ANKLE2   |
| 1.30E-12 | 0.336608587 | 0.123 | 0.23  | 2.42E-08 | 13 | RPAIN    |
| 1.30E-12 | 0.26187271  | 0.105 | 0.213 | 2.43E-08 | 13 | SDAD1    |
| 1.31E-12 | 0.375963815 | 0.249 | 0.445 | 2.44E-08 | 13 | YME1L1   |

|          |             |       |       |          |    |            |
|----------|-------------|-------|-------|----------|----|------------|
| 1.42E-12 | 0.267297738 | 0.113 | 0.229 | 2.64E-08 | 13 | TAF3       |
| 1.50E-12 | 0.35400393  | 0.157 | 0.29  | 2.80E-08 | 13 | TIAL1      |
| 1.52E-12 | 0.435996019 | 0.216 | 0.386 | 2.83E-08 | 13 | TBC1D10C   |
| 1.54E-12 | 0.335548523 | 0.167 | 0.309 | 2.86E-08 | 13 | SFT2D2     |
| 1.58E-12 | 0.264088017 | 0.132 | 0.262 | 2.95E-08 | 13 | CDC73      |
| 1.59E-12 | 0.412377272 | 0.26  | 0.464 | 2.96E-08 | 13 | NDFIP1     |
| 1.60E-12 | 0.384026313 | 0.142 | 0.281 | 2.98E-08 | 13 | MARS       |
| 1.82E-12 | 0.288617761 | 0.122 | 0.234 | 3.40E-08 | 13 | RAB5A      |
| 1.96E-12 | 0.350754176 | 0.185 | 0.326 | 3.66E-08 | 13 | RAB30      |
| 1.97E-12 | 0.301476608 | 0.26  | 0.455 | 3.67E-08 | 13 | MBP        |
| 1.97E-12 | 0.277924877 | 0.126 | 0.265 | 3.68E-08 | 13 | ARID1A     |
| 2.01E-12 | 0.359878269 | 0.152 | 0.275 | 3.75E-08 | 13 | TCERG1     |
| 2.22E-12 | 0.345492041 | 0.147 | 0.249 | 4.13E-08 | 13 | C16orf87   |
| 2.23E-12 | 0.697410429 | 0.527 | 0.641 | 4.16E-08 | 13 | RUBCNL     |
| 2.51E-12 | 0.325412254 | 0.141 | 0.271 | 4.68E-08 | 13 | MAP4K1     |
| 2.83E-12 | 0.330967332 | 0.157 | 0.286 | 5.28E-08 | 13 | CLTC       |
| 3.30E-12 | 0.353816048 | 0.191 | 0.367 | 6.15E-08 | 13 | AKNA       |
| 3.40E-12 | 0.281679332 | 0.124 | 0.23  | 6.34E-08 | 13 | IMMT       |
| 5.98E-12 | 0.309510407 | 0.146 | 0.26  | 1.12E-07 | 13 | FUBP1      |
| 6.04E-12 | 0.294924475 | 0.144 | 0.281 | 1.13E-07 | 13 | TNPO1      |
| 6.41E-12 | 0.364458785 | 0.168 | 0.307 | 1.20E-07 | 13 | GINM1      |
| 6.92E-12 | 0.379993399 | 0.142 | 0.247 | 1.29E-07 | 13 | NUTM2B-AS1 |
| 8.28E-12 | 0.282566499 | 0.118 | 0.234 | 1.54E-07 | 13 | CUL1       |
| 8.63E-12 | 0.347530909 | 0.198 | 0.369 | 1.61E-07 | 13 | HSH2D      |
| 1.19E-11 | 0.31349761  | 0.131 | 0.247 | 2.22E-07 | 13 | KIF2A      |
| 1.27E-11 | 0.401066991 | 0.224 | 0.367 | 2.36E-07 | 13 | KIAA0040   |
| 1.32E-11 | 0.335504433 | 0.139 | 0.247 | 2.47E-07 | 13 | PNKP       |
| 1.49E-11 | 0.301007632 | 0.148 | 0.287 | 2.77E-07 | 13 | ATXN10     |
| 1.66E-11 | 0.393503006 | 0.213 | 0.383 | 3.09E-07 | 13 | CELF1      |
| 1.67E-11 | 0.340477548 | 0.136 | 0.257 | 3.11E-07 | 13 | MTERF4     |
| 1.68E-11 | 0.329914109 | 0.384 | 0.654 | 3.12E-07 | 13 | HLA-DMB    |
| 1.80E-11 | 0.267204306 | 0.117 | 0.226 | 3.35E-07 | 13 | EPSTI1     |
| 1.88E-11 | 0.264018342 | 0.124 | 0.251 | 3.51E-07 | 13 | CHMP7      |
| 2.13E-11 | 0.388024289 | 0.26  | 0.455 | 3.97E-07 | 13 | GCC2       |
| 2.67E-11 | 0.385502252 | 0.15  | 0.267 | 4.98E-07 | 13 | PSMC6      |
| 2.87E-11 | 0.327125129 | 0.122 | 0.223 | 5.35E-07 | 13 | PAFAH1B2   |
| 3.00E-11 | 0.342437343 | 0.354 | 0.644 | 5.60E-07 | 13 | SRRM2      |
| 3.01E-11 | 0.272040601 | 0.137 | 0.288 | 5.62E-07 | 13 | WDR74      |
| 3.18E-11 | 0.63098618  | 0.527 | 0.69  | 5.92E-07 | 13 | EPC1       |
| 3.38E-11 | 0.366221781 | 0.149 | 0.264 | 6.29E-07 | 13 | CCDC88C    |
| 4.01E-11 | 0.306498429 | 0.181 | 0.34  | 7.47E-07 | 13 | SNX18      |
| 4.17E-11 | 0.269033924 | 0.137 | 0.255 | 7.78E-07 | 13 | STAM       |
| 5.03E-11 | 0.326843897 | 0.128 | 0.239 | 9.38E-07 | 13 | FNTA       |
| 5.65E-11 | 0.283441593 | 0.29  | 0.511 | 1.05E-06 | 13 | EHMT1      |
| 6.00E-11 | 0.358963741 | 0.169 | 0.308 | 1.12E-06 | 13 | ARID4A     |
| 6.22E-11 | 0.491813468 | 0.203 | 0.318 | 1.16E-06 | 13 | CPSF6      |

|          |             |       |       |          |    |         |
|----------|-------------|-------|-------|----------|----|---------|
| 6.26E-11 | 0.293700088 | 0.115 | 0.22  | 1.17E-06 | 13 | THUMPD1 |
| 6.92E-11 | 0.286851601 | 0.125 | 0.232 | 1.29E-06 | 13 | ZEB1    |
| 8.44E-11 | 0.383286815 | 0.173 | 0.303 | 1.57E-06 | 13 | TMOD3   |
| 9.26E-11 | 0.29856255  | 0.123 | 0.251 | 1.73E-06 | 13 | TCIRG1  |
| 9.67E-11 | 0.283724759 | 0.104 | 0.205 | 1.80E-06 | 13 | ACSL3   |
| 9.80E-11 | 0.370499415 | 0.158 | 0.282 | 1.83E-06 | 13 | TMEM87A |
| 1.01E-10 | 0.436525819 | 0.231 | 0.406 | 1.88E-06 | 13 | BPTF    |
| 1.16E-10 | 0.329549235 | 0.143 | 0.252 | 2.15E-06 | 13 | ZBTB38  |
| 1.23E-10 | 0.366153438 | 0.143 | 0.251 | 2.30E-06 | 13 | CD2AP   |
| 1.31E-10 | 0.382579477 | 0.197 | 0.342 | 2.44E-06 | 13 | CDC25B  |
| 1.35E-10 | 0.360983827 | 0.158 | 0.27  | 2.51E-06 | 13 | USP9X   |
| 1.52E-10 | 0.346754354 | 0.253 | 0.443 | 2.82E-06 | 13 | CCDC69  |
| 1.52E-10 | 0.379312237 | 0.166 | 0.289 | 2.83E-06 | 13 | SYNRG   |
| 1.52E-10 | 0.267124525 | 0.117 | 0.231 | 2.84E-06 | 13 | SEMA4B  |
| 1.69E-10 | 0.473106032 | 0.222 | 0.398 | 3.15E-06 | 13 | ARHGAP4 |
| 1.77E-10 | 0.350810295 | 0.105 | 0.209 | 3.31E-06 | 13 | TMEM259 |
| 1.81E-10 | 0.337919976 | 0.157 | 0.281 | 3.37E-06 | 13 | ZNF394  |
| 2.40E-10 | 0.422676562 | 0.304 | 0.543 | 4.48E-06 | 13 | MOB1A   |
| 2.59E-10 | 0.348592342 | 0.302 | 0.526 | 4.83E-06 | 13 | WSB1    |
| 2.61E-10 | 0.351564219 | 0.323 | 0.567 | 4.87E-06 | 13 | SFPQ    |
| 2.87E-10 | 0.353256056 | 0.276 | 0.477 | 5.36E-06 | 13 | ZC3HAV1 |
| 3.12E-10 | 0.303000222 | 0.164 | 0.301 | 5.82E-06 | 13 | PIK3AP1 |
| 3.39E-10 | 0.361545695 | 0.172 | 0.3   | 6.31E-06 | 13 | HOOK3   |
| 3.46E-10 | 0.35575259  | 0.179 | 0.317 | 6.44E-06 | 13 | STAG2   |
| 3.74E-10 | 0.277070345 | 0.124 | 0.241 | 6.97E-06 | 13 | CACUL1  |
| 3.89E-10 | 0.269272861 | 0.127 | 0.247 | 7.25E-06 | 13 | CNOT6L  |
| 4.43E-10 | 0.39861612  | 0.187 | 0.32  | 8.26E-06 | 13 | CNOT2   |
| 4.48E-10 | 0.726799376 | 0.513 | 0.628 | 8.36E-06 | 13 | JMJD1C  |
| 4.74E-10 | 0.331075717 | 0.173 | 0.329 | 8.84E-06 | 13 | PNPLA8  |
| 5.34E-10 | 0.386970734 | 0.197 | 0.331 | 9.96E-06 | 13 | RB1CC1  |
| 5.67E-10 | 0.42552778  | 0.263 | 0.466 | 1.06E-05 | 13 | TPR     |
| 7.22E-10 | 0.384728242 | 0.217 | 0.392 | 1.35E-05 | 13 | CYLD    |
| 8.64E-10 | 0.338099764 | 0.143 | 0.259 | 1.61E-05 | 13 | PSPC1   |
| 9.45E-10 | 0.291671491 | 0.139 | 0.267 | 1.76E-05 | 13 | NAA50   |
| 9.70E-10 | 0.37750046  | 0.143 | 0.253 | 1.81E-05 | 13 | FARP2   |
| 1.06E-09 | 0.351321043 | 0.148 | 0.268 | 1.98E-05 | 13 | ACADM   |
| 1.06E-09 | 0.514210759 | 0.226 | 0.347 | 1.98E-05 | 13 | CCDC50  |
| 1.08E-09 | 0.369025322 | 0.229 | 0.415 | 2.02E-05 | 13 | ATP2A3  |
| 1.18E-09 | 0.483188756 | 0.221 | 0.357 | 2.19E-05 | 13 | OCIAD1  |
| 1.23E-09 | 0.441829364 | 0.249 | 0.448 | 2.29E-05 | 13 | NT5C    |
| 1.58E-09 | 0.301527369 | 0.312 | 0.543 | 2.95E-05 | 13 | GGA2    |
| 1.69E-09 | 0.360980075 | 0.155 | 0.276 | 3.16E-05 | 13 | VHL     |
| 2.29E-09 | 0.404007512 | 0.163 | 0.283 | 4.27E-05 | 13 | RNF115  |
| 2.46E-09 | 0.391411082 | 0.151 | 0.273 | 4.58E-05 | 13 | WHAMM   |
| 2.48E-09 | 0.407522866 | 0.202 | 0.338 | 4.62E-05 | 13 | STAT1   |
| 2.59E-09 | 0.320869449 | 0.152 | 0.271 | 4.82E-05 | 13 | PARVG   |

|          |             |       |       |             |    |           |
|----------|-------------|-------|-------|-------------|----|-----------|
| 2.71E-09 | 0.321072529 | 0.241 | 0.417 | 5.05E-05    | 13 | SLC38A2   |
| 2.98E-09 | 0.307448541 | 0.155 | 0.267 | 5.55E-05    | 13 | MBNL2     |
| 3.94E-09 | 0.415939995 | 0.25  | 0.438 | 7.35E-05    | 13 | SPCS2     |
| 4.74E-09 | 0.348757419 | 0.17  | 0.313 | 8.84E-05    | 13 | MAP4      |
| 5.12E-09 | 0.420639509 | 0.175 | 0.311 | 9.54E-05    | 13 | DHX36     |
| 5.69E-09 | 0.392126979 | 0.182 | 0.313 | 0.000106106 | 13 | PUM1      |
| 6.20E-09 | 0.424156409 | 0.225 | 0.359 | 0.000115525 | 13 | EPS15     |
| 6.46E-09 | 0.48396807  | 0.199 | 0.34  | 0.000120365 | 13 | SYTL1     |
| 6.62E-09 | 0.290247094 | 0.294 | 0.525 | 0.000123446 | 13 | GPBP1     |
| 6.79E-09 | 0.432319716 | 0.301 | 0.527 | 0.000126599 | 13 | KTN1      |
| 8.24E-09 | 0.5012413   | 0.245 | 0.406 | 0.000153665 | 13 | BDP1      |
| 8.58E-09 | 0.432481057 | 0.238 | 0.421 | 0.000159853 | 13 | UPF2      |
| 8.60E-09 | 0.367265576 | 0.155 | 0.256 | 0.000160379 | 13 | PPP6R3    |
| 8.90E-09 | 0.421382877 | 0.192 | 0.325 | 0.000165937 | 13 | CCAR1     |
| 9.79E-09 | 0.276957521 | 0.122 | 0.23  | 0.000182413 | 13 | YLPM1     |
| 1.08E-08 | 0.275012968 | 0.115 | 0.216 | 0.000202237 | 13 | GLYR1     |
| 1.12E-08 | 0.403417707 | 0.214 | 0.378 | 0.000207926 | 13 | WDR33     |
| 1.13E-08 | 0.324205146 | 0.131 | 0.235 | 0.00021128  | 13 | HDAC2     |
| 1.26E-08 | 0.345775817 | 0.153 | 0.282 | 0.000234808 | 13 | GMFB      |
| 1.26E-08 | 0.444102821 | 0.154 | 0.258 | 0.000235793 | 13 | ASXL1     |
| 1.61E-08 | 0.474412016 | 0.57  | 0.776 | 0.000300451 | 13 | STK4      |
| 1.78E-08 | 0.259183417 | 0.121 | 0.236 | 0.000331697 | 13 | GAB2      |
| 1.88E-08 | 0.339784228 | 0.135 | 0.243 | 0.000350539 | 13 | CAPN2     |
| 2.08E-08 | 0.261418431 | 0.197 | 0.318 | 0.000388303 | 13 | LINC01480 |
| 2.18E-08 | 0.337097909 | 0.213 | 0.388 | 0.000407045 | 13 | USP11     |
| 2.38E-08 | 0.466567868 | 0.193 | 0.327 | 0.000443684 | 13 | BOD1L1    |
| 2.39E-08 | 0.34601115  | 0.142 | 0.254 | 0.000446142 | 13 | STX12     |
| 2.41E-08 | 0.464631347 | 0.217 | 0.342 | 0.000449811 | 13 | TRIM22    |
| 2.59E-08 | 0.371315444 | 0.401 | 0.675 | 0.000482233 | 13 | Sep-06    |
| 2.76E-08 | 0.250551796 | 0.115 | 0.238 | 0.000514989 | 13 | RAPGEF1   |
| 3.07E-08 | 0.298739008 | 0.214 | 0.384 | 0.000571626 | 13 | FBXO21    |
| 3.71E-08 | 0.452425069 | 0.187 | 0.297 | 0.000691633 | 13 | RAB3GAP1  |
| 4.13E-08 | 0.270171453 | 0.13  | 0.252 | 0.000770747 | 13 | VPS26A    |
| 4.27E-08 | 0.442320245 | 0.177 | 0.307 | 0.000796435 | 13 | GON4L     |
| 4.47E-08 | 0.381253682 | 0.354 | 0.607 | 0.000832937 | 13 | JAK1      |
| 5.59E-08 | 0.403767451 | 0.213 | 0.373 | 0.001042357 | 13 | HDAC7     |
| 6.17E-08 | 0.404462522 | 0.173 | 0.297 | 0.001149664 | 13 | NDE1      |
| 6.24E-08 | 0.395272597 | 0.368 | 0.618 | 0.001162278 | 13 | PPP1CC    |
| 6.36E-08 | 0.48483688  | 0.282 | 0.461 | 0.001185329 | 13 | APPL1     |
| 6.69E-08 | 0.308194862 | 0.163 | 0.297 | 0.001246576 | 13 | FAM3C     |
| 7.71E-08 | 0.395025585 | 0.186 | 0.292 | 0.00143648  | 13 | Mar-03    |
| 8.68E-08 | 0.346906608 | 0.145 | 0.257 | 0.001618184 | 13 | ORMDL1    |
| 9.33E-08 | 0.289246639 | 0.114 | 0.215 | 0.001739678 | 13 | NAAA      |
| 9.98E-08 | 0.715707746 | 0.46  | 0.579 | 0.001860711 | 13 | SYK       |
| 1.03E-07 | 0.400492554 | 0.311 | 0.551 | 0.001924281 | 13 | IQGAP1    |
| 1.24E-07 | 0.417071244 | 0.155 | 0.273 | 0.002308693 | 13 | AP1G2     |

|          |             |       |       |             |    |          |
|----------|-------------|-------|-------|-------------|----|----------|
| 1.40E-07 | 0.465496647 | 0.186 | 0.311 | 0.002606594 | 13 | ARHGEF2  |
| 1.43E-07 | 0.464688244 | 0.276 | 0.448 | 0.00267307  | 13 | TAF15    |
| 1.65E-07 | 0.299816939 | 0.113 | 0.214 | 0.003069485 | 13 | NSRP1    |
| 1.91E-07 | 0.406652982 | 0.296 | 0.454 | 0.003565592 | 13 | ZEB2     |
| 1.91E-07 | 0.445041437 | 0.219 | 0.382 | 0.003567388 | 13 | LSM8     |
| 2.45E-07 | 0.455430448 | 0.18  | 0.304 | 0.004563161 | 13 | GIT2     |
| 2.74E-07 | 0.395351828 | 0.17  | 0.277 | 0.005111385 | 13 | NAA15    |
| 2.75E-07 | 0.446515918 | 0.277 | 0.468 | 0.005128971 | 13 | GGNBP2   |
| 2.86E-07 | 0.370495613 | 0.185 | 0.338 | 0.00532782  | 13 | NAP1L4   |
| 2.88E-07 | 0.449466627 | 0.27  | 0.454 | 0.005371725 | 13 | ADAR     |
| 2.89E-07 | 0.328033085 | 0.146 | 0.252 | 0.005391631 | 13 | DCK      |
| 3.16E-07 | 0.544759288 | 0.632 | 0.847 | 0.005886586 | 13 | SON      |
| 3.24E-07 | 0.454182722 | 0.247 | 0.411 | 0.0060444   | 13 | SEC31A   |
| 3.29E-07 | 0.274696642 | 0.481 | 0.789 | 0.00613492  | 13 | HNRNPDL  |
| 3.45E-07 | 0.382051081 | 0.167 | 0.276 | 0.0064293   | 13 | KAT6B    |
| 3.45E-07 | 0.379029782 | 0.141 | 0.253 | 0.006432661 | 13 | FCRL5    |
| 3.69E-07 | 0.548057183 | 0.607 | 0.785 | 0.006885566 | 13 | KMT2E    |
| 3.75E-07 | 0.450411152 | 0.282 | 0.472 | 0.006992412 | 13 | IFI16    |
| 3.95E-07 | 0.42244945  | 0.166 | 0.27  | 0.00736014  | 13 | ANTXR2   |
| 4.37E-07 | 0.337299281 | 0.36  | 0.601 | 0.00815282  | 13 | BCLAF1   |
| 4.76E-07 | 0.423102867 | 0.171 | 0.284 | 0.008874669 | 13 | COL9A2   |
| 4.82E-07 | 0.633725141 | 0.499 | 0.653 | 0.008982647 | 13 | CYTH1    |
| 4.85E-07 | 0.470594389 | 0.257 | 0.42  | 0.009041799 | 13 | KDM5A    |
| 4.94E-07 | 0.442328047 | 0.27  | 0.448 | 0.009211977 | 13 | CBX3     |
| 4.95E-07 | 0.401748693 | 0.198 | 0.324 | 0.009229916 | 13 | CCNH     |
| 6.62E-07 | 0.422064377 | 0.179 | 0.309 | 0.012347426 | 13 | EP400    |
| 6.74E-07 | 0.346264189 | 0.128 | 0.229 | 0.012556643 | 13 | FAM69A   |
| 6.82E-07 | 0.486174845 | 0.246 | 0.391 | 0.01271935  | 13 | UBE3A    |
| 7.27E-07 | 0.392066833 | 0.365 | 0.59  | 0.013549131 | 13 | ARID4B   |
| 7.70E-07 | 0.395078163 | 0.188 | 0.318 | 0.01434523  | 13 | CREBRF   |
| 7.71E-07 | 0.421941549 | 0.26  | 0.435 | 0.0143692   | 13 | PRPF38B  |
| 7.91E-07 | 0.398116587 | 0.19  | 0.331 | 0.014737729 | 13 | CAND1    |
| 8.08E-07 | 0.390098581 | 0.174 | 0.286 | 0.015056191 | 13 | CENPC    |
| 9.08E-07 | 0.26494385  | 0.36  | 0.525 | 0.016916731 | 13 | HIST1H1E |
| 1.11E-06 | 0.409366851 | 0.194 | 0.332 | 0.020733857 | 13 | UHMK1    |
| 1.18E-06 | 0.3330902   | 0.141 | 0.244 | 0.022039797 | 13 | ZNF326   |
| 1.40E-06 | 0.408480247 | 0.176 | 0.281 | 0.026116425 | 13 | NT5C3A   |
| 1.46E-06 | 0.456707528 | 0.16  | 0.264 | 0.027190495 | 13 | CARD11   |
| 1.58E-06 | 0.317308385 | 0.416 | 0.715 | 0.02949673  | 13 | UBE2D2   |
| 1.63E-06 | 0.371532393 | 0.168 | 0.288 | 0.030390761 | 13 | ETS1     |
| 2.13E-06 | 0.654318101 | 0.484 | 0.648 | 0.039745318 | 13 | SP100    |
| 2.46E-06 | 0.43756281  | 0.219 | 0.358 | 0.04582276  | 13 | RIOK3    |
| 2.63E-06 | 0.448544428 | 0.185 | 0.301 | 0.048971038 | 13 | ATF6B    |
| 3.18E-06 | 0.420311463 | 0.214 | 0.32  | 0.059194863 | 13 | RALGAPA1 |
| 3.33E-06 | 0.373806305 | 0.223 | 0.372 | 0.062071122 | 13 | TMEM154  |
| 3.59E-06 | 0.367884841 | 0.152 | 0.262 | 0.066925478 | 13 | FGD3     |

|          |             |       |       |             |    |          |
|----------|-------------|-------|-------|-------------|----|----------|
| 3.90E-06 | 0.459775519 | 0.217 | 0.329 | 0.072738812 | 13 | FAM13B   |
| 4.32E-06 | 0.490729538 | 0.223 | 0.358 | 0.080494371 | 13 | SPEN     |
| 4.34E-06 | 0.416061818 | 0.263 | 0.437 | 0.080840456 | 13 | PPP1R12A |
| 4.95E-06 | 0.436142059 | 0.225 | 0.365 | 0.092222096 | 13 | PDXDC1   |
| 5.41E-06 | 0.434704853 | 0.252 | 0.401 | 0.100901821 | 13 | PAFAH1B1 |
| 5.64E-06 | 0.440526411 | 0.199 | 0.321 | 0.105189483 | 13 | TMEM165  |
| 5.69E-06 | 0.400643792 | 0.193 | 0.319 | 0.106021857 | 13 | PIKFYVE  |
| 6.12E-06 | 0.425233794 | 0.28  | 0.475 | 0.114035496 | 13 | KIF5B    |
| 6.31E-06 | 0.448529108 | 0.319 | 0.542 | 0.117622713 | 13 | EWSR1    |
| 6.59E-06 | 0.445118473 | 0.213 | 0.362 | 0.122807143 | 13 | CNOT1    |
| 6.68E-06 | 0.425003241 | 0.17  | 0.287 | 0.124531222 | 13 | TRIM44   |
| 7.29E-06 | 0.471585135 | 0.204 | 0.329 | 0.135896079 | 13 | PHYKPL   |
| 7.29E-06 | 0.421291747 | 0.244 | 0.407 | 0.135925718 | 13 | SMARCA5  |
| 9.52E-06 | 0.341471883 | 0.408 | 0.679 | 0.177391355 | 13 | DDX24    |
| 9.80E-06 | 0.476551798 | 0.226 | 0.351 | 0.182773153 | 13 | RSBN1L   |
| 1.18E-05 | 0.419280487 | 0.294 | 0.498 | 0.219148744 | 13 | STAT3    |
| 1.33E-05 | 0.350903509 | 0.412 | 0.681 | 0.248833326 | 13 | CTSS     |
| 1.37E-05 | 0.505884876 | 0.24  | 0.363 | 0.254457607 | 13 | FCGR2B   |
| 1.49E-05 | 0.47265454  | 0.244 | 0.401 | 0.277764084 | 13 | ACIN1    |
| 1.52E-05 | 0.405026834 | 0.159 | 0.263 | 0.282842763 | 13 | SIN3A    |
| 1.95E-05 | 0.515756756 | 0.279 | 0.456 | 0.364336955 | 13 | PTPN2    |
| 1.96E-05 | 0.674358694 | 0.475 | 0.632 | 0.365296923 | 13 | SLC38A1  |
| 1.99E-05 | 0.522173556 | 0.355 | 0.546 | 0.370056882 | 13 | HMGN3    |
| 2.00E-05 | 0.598666875 | 0.176 | 0.292 | 0.372998229 | 13 | KCNN4    |
| 2.08E-05 | 0.353660708 | 0.146 | 0.249 | 0.388656411 | 13 | C5orf24  |
| 2.19E-05 | 0.524303326 | 0.574 | 0.778 | 0.409076106 | 13 | VOPPI    |
| 2.29E-05 | 0.460847562 | 0.196 | 0.31  | 0.426285147 | 13 | TBC1D1   |
| 2.51E-05 | 0.413834147 | 0.168 | 0.269 | 0.467174582 | 13 | PLEKHF2  |
| 2.99E-05 | 0.407262232 | 0.181 | 0.282 | 0.557414054 | 13 | METTTL7A |
| 3.45E-05 | 0.759736077 | 0.501 | 0.63  | 0.643665075 | 13 | RCSD1    |
| 3.55E-05 | 0.435421972 | 0.206 | 0.341 | 0.661468047 | 13 | SAFB     |
| 3.83E-05 | 0.616682347 | 0.304 | 0.478 | 0.714452527 | 13 | ARHGEF1  |
| 4.02E-05 | 0.467707068 | 0.252 | 0.399 | 0.749809064 | 13 | ADK      |
| 4.06E-05 | 0.440771593 | 0.256 | 0.42  | 0.757412253 | 13 | RBBP4    |
| 4.12E-05 | 0.374891949 | 0.282 | 0.451 | 0.76785102  | 13 | SMIM14   |
| 5.02E-05 | 0.398468401 | 0.281 | 0.447 | 0.935726697 | 13 | PTPN22   |
| 5.05E-05 | 0.466498818 | 0.24  | 0.37  | 0.941776122 | 13 | PRPF8    |
| 5.44E-05 | 0.494183736 | 0.23  | 0.367 | 1           | 13 | USP8     |
| 6.13E-05 | 0.403428316 | 0.246 | 0.404 | 1           | 13 | TRA2A    |
| 6.29E-05 | 0.399242782 | 0.204 | 0.341 | 1           | 13 | RNF149   |
| 6.33E-05 | 0.504199255 | 0.31  | 0.478 | 1           | 13 | EPB41    |
| 6.50E-05 | 0.509992228 | 0.246 | 0.386 | 1           | 13 | ANAPC5   |
| 7.15E-05 | 0.500313741 | 0.228 | 0.37  | 1           | 13 | PRRC2B   |
| 7.78E-05 | 0.468927604 | 0.257 | 0.402 | 1           | 13 | BTK      |
| 8.40E-05 | 0.496365475 | 0.231 | 0.37  | 1           | 13 | CDC40    |
| 8.62E-05 | 0.458208196 | 0.339 | 0.56  | 1           | 13 | IL10RA   |

|             |             |       |       |   |    |             |
|-------------|-------------|-------|-------|---|----|-------------|
| 9.46E-05    | 0.42599079  | 0.176 | 0.277 | 1 | 13 | BSDC1       |
| 0.000107565 | 0.420922128 | 0.181 | 0.303 | 1 | 13 | FIP1L1      |
| 0.000113251 | 0.388044542 | 0.176 | 0.284 | 1 | 13 | Mar-07      |
| 0.00012812  | 0.457859013 | 0.232 | 0.367 | 1 | 13 | ROR1        |
| 0.000128943 | 0.428919511 | 0.19  | 0.301 | 1 | 13 | GPATCH8     |
| 0.000160864 | 0.464559245 | 0.255 | 0.399 | 1 | 13 | OFD1        |
| 0.000165754 | 0.515994877 | 0.248 | 0.384 | 1 | 13 | SNRNP200    |
| 0.000192738 | 0.497687593 | 0.238 | 0.366 | 1 | 13 | SMARCC2     |
| 0.000197911 | 0.419383506 | 0.194 | 0.312 | 1 | 13 | FGD2        |
| 0.000211113 | 0.464569152 | 0.183 | 0.314 | 1 | 13 | MAPK8IP3    |
| 0.000215232 | 0.537387536 | 0.29  | 0.441 | 1 | 13 | MAP3K1      |
| 0.000250083 | 0.386135697 | 0.179 | 0.294 | 1 | 13 | KLHL24      |
| 0.000267517 | 0.35149646  | 0.163 | 0.279 | 1 | 13 | SPAG9       |
| 0.000291412 | 0.466559673 | 0.34  | 0.543 | 1 | 13 | CYFIP2      |
| 0.00031185  | 0.436449255 | 0.396 | 0.619 | 1 | 13 | CAST        |
| 0.000368043 | 0.574177648 | 0.276 | 0.411 | 1 | 13 | SRSF4       |
| 0.000380884 | 0.520477724 | 0.286 | 0.448 | 1 | 13 | TGOLN2      |
| 0.000434122 | 0.468522934 | 0.223 | 0.338 | 1 | 13 | SRSF1       |
| 0.000660753 | 0.259002911 | 0.464 | 0.769 | 1 | 13 | EIF4G2      |
| 0.000694626 | 0.481342693 | 0.225 | 0.352 | 1 | 13 | BBX         |
| 0.000731326 | 0.463227597 | 0.202 | 0.313 | 1 | 13 | TMPO        |
| 0.000912243 | 0.547922498 | 0.214 | 0.319 | 1 | 13 | STRBP       |
| 0.000929672 | 0.486302723 | 0.214 | 0.327 | 1 | 13 | TMED4       |
| 0.000945452 | 0.627046333 | 0.443 | 0.606 | 1 | 13 | RBM25       |
| 0.001007135 | 0.513262997 | 0.289 | 0.445 | 1 | 13 | DYNC1H1     |
| 0.001166683 | 0.534974953 | 0.212 | 0.326 | 1 | 13 | CDK12       |
| 0.001281246 | 0.501066296 | 0.207 | 0.314 | 1 | 13 | SLC25A36    |
| 0.001376864 | 0.769654657 | 0.42  | 0.532 | 1 | 13 | TNRC6B      |
| 0.001513906 | 0.280693719 | 0.467 | 0.684 | 1 | 13 | FCER2       |
| 0.001552559 | 0.631266125 | 0.427 | 0.577 | 1 | 13 | DDX6        |
| 0.001582187 | 0.634286828 | 0.393 | 0.516 | 1 | 13 | UVRAG       |
| 0.001663415 | 0.273399232 | 0.382 | 0.581 | 1 | 13 | AC016831.7  |
| 0.001991793 | 0.524615809 | 0.239 | 0.369 | 1 | 13 | ADD1        |
| 0.002042177 | 0.551672617 | 0.29  | 0.451 | 1 | 13 | TBRG1       |
| 0.002428133 | 0.405077833 | 0.368 | 0.552 | 1 | 13 | AGPAT5      |
| 0.002606123 | 0.403332605 | 0.392 | 0.632 | 1 | 13 | SH3BP5      |
| 0.002641192 | 0.553082946 | 0.464 | 0.637 | 1 | 13 | AKAP13      |
| 0.002692774 | 0.455250806 | 0.207 | 0.311 | 1 | 13 | VAMP2       |
| 0.002692956 | 0.738113069 | 0.379 | 0.489 | 1 | 13 | AKAP9       |
| 0.002725769 | 0.514902648 | 0.35  | 0.552 | 1 | 13 | BAZ2A       |
| 0.003062013 | 0.650641299 | 0.457 | 0.616 | 1 | 13 | SCAF11      |
| 0.003144573 | 0.541461071 | 0.249 | 0.369 | 1 | 13 | GOLGA4      |
| 0.003738167 | 0.560466181 | 0.249 | 0.353 | 1 | 13 | THUMPD3-AS1 |
| 0.003747228 | 0.494612369 | 0.34  | 0.533 | 1 | 13 | ITSN2       |
| 0.004289319 | 0.465951699 | 0.283 | 0.464 | 1 | 13 | TTC3        |
| 0.004903986 | 0.532967515 | 0.255 | 0.377 | 1 | 13 | PAX5        |

|             |             |       |       |           |    |            |
|-------------|-------------|-------|-------|-----------|----|------------|
| 0.004937227 | 0.549332147 | 0.266 | 0.393 | 1         | 13 | NDUFV1     |
| 0.005648772 | 0.419529984 | 0.356 | 0.569 | 1         | 13 | ARHGAP25   |
| 0.006047494 | 0.444514999 | 0.402 | 0.647 | 1         | 13 | MTDH       |
| 0.006370089 | 0.489450057 | 0.255 | 0.382 | 1         | 13 | AFTPH      |
| 0.007042112 | 0.27116187  | 0.461 | 0.741 | 1         | 13 | SRSF5      |
| 0.007843637 | 0.51684434  | 0.318 | 0.495 | 1         | 13 | AFF4       |
| 0.00891326  | 0.538290735 | 0.377 | 0.571 | 1         | 13 | IFT57      |
| 1.72E-77    | 0.693057278 | 0.731 | 0.571 | 3.21E-73  | 14 | RPS4Y1     |
| 2.58E-199   | 1.587857447 | 0.413 | 0.022 | 4.81E-195 | 15 | ANXA1      |
| 4.71E-161   | 1.498001081 | 0.347 | 0.02  | 8.78E-157 | 15 | GNLY       |
| 1.21E-150   | 0.801312856 | 0.884 | 0.709 | 2.26E-146 | 15 | SRGN       |
| 1.23E-131   | 1.227138966 | 0.321 | 0.028 | 2.29E-127 | 15 | NKG7       |
| 2.30E-120   | 0.565785564 | 0.95  | 0.799 | 4.28E-116 | 15 | TAGLN2     |
| 1.73E-98    | 1.107415123 | 0.316 | 0.067 | 3.23E-94  | 15 | CCL5       |
| 1.76E-89    | 0.637006891 | 0.733 | 0.504 | 3.29E-85  | 15 | RGCC       |
| 4.55E-87    | 1.863016689 | 0.464 | 0.245 | 8.48E-83  | 15 | AL138963.3 |
| 4.34E-76    | 0.358054506 | 0.713 | 0.468 | 8.09E-72  | 15 | GPR183     |
| 3.99E-74    | 0.699675264 | 0.53  | 0.308 | 7.43E-70  | 15 | CREM       |
| 2.65E-69    | 0.744284482 | 0.196 | 0.026 | 4.95E-65  | 15 | IL32       |
| 5.24E-68    | 0.665731454 | 0.175 | 0.013 | 9.77E-64  | 15 | IL7R       |
| 2.65E-67    | 0.49746761  | 0.744 | 0.636 | 4.94E-63  | 15 | PDE4B      |
| 1.01E-64    | 0.411936877 | 0.81  | 0.682 | 1.88E-60  | 15 | CD55       |
| 1.93E-61    | 0.494458963 | 0.633 | 0.517 | 3.60E-57  | 15 | HIST1H1E   |
| 3.69E-56    | 0.542856144 | 0.123 | 0.005 | 6.87E-52  | 15 | GZMB       |
| 9.46E-54    | 0.568647091 | 0.33  | 0.138 | 1.76E-49  | 15 | MYADM      |
| 4.98E-49    | 0.778143573 | 0.403 | 0.251 | 9.29E-45  | 15 | TNFAIP3    |
| 1.24E-48    | 0.599451127 | 0.153 | 0.019 | 2.32E-44  | 15 | CD8A       |
| 1.76E-48    | 0.538187904 | 0.134 | 0.014 | 3.29E-44  | 15 | CD3E       |
| 6.56E-46    | 0.47281738  | 0.133 | 0.02  | 1.22E-41  | 15 | CD7        |
| 2.43E-45    | 0.721486842 | 0.028 | 0.147 | 4.52E-41  | 15 | JCHAIN     |
| 1.53E-44    | 0.445151299 | 0.115 | 0.009 | 2.86E-40  | 15 | CTSW       |
| 5.32E-41    | 0.697443012 | 0.283 | 0.14  | 9.91E-37  | 15 | SAMSN1     |
| 3.23E-35    | 0.439746535 | 0.129 | 0.025 | 6.01E-31  | 15 | CD2        |
| 3.50E-34    | 0.553750578 | 0.44  | 0.334 | 6.52E-30  | 15 | S100A11    |
| 1.16E-29    | 0.317096371 | 0.572 | 0.422 | 2.17E-25  | 15 | ZNF331     |
| 1.20E-27    | 0.490537039 | 0.377 | 0.267 | 2.24E-23  | 15 | SLC2A3     |
| 2.39E-23    | 0.364959972 | 0.37  | 0.246 | 4.45E-19  | 15 | AC007952.4 |
| 0.001607586 | 0.345511659 | 0.44  | 0.541 | 1         | 15 | HNRNPF     |
| 0.009351111 | 0.993856971 | 0.592 | 0.748 | 1         | 15 | MT-ND6     |
| 5.31E-306   | 1.212905738 | 0.998 | 0.846 | 9.90E-302 | 16 | GAPDH      |
| 1.54E-263   | 1.056105854 | 0.997 | 0.851 | 2.87E-259 | 16 | ACTG1      |
| 5.02E-252   | 1.157881    | 0.968 | 0.624 | 9.36E-248 | 16 | DBI        |
| 1.95E-229   | 0.902457187 | 0.801 | 0.295 | 3.64E-225 | 16 | PTMS       |
| 4.73E-224   | 0.927686533 | 0.742 | 0.224 | 8.82E-220 | 16 | LAG3       |
| 9.25E-208   | 0.965301656 | 0.652 | 0.154 | 1.72E-203 | 16 | LILRB4     |
| 2.57E-198   | 0.756883675 | 0.968 | 0.712 | 4.80E-194 | 16 | CLIC1      |



|           |             |       |       |           |    |           |
|-----------|-------------|-------|-------|-----------|----|-----------|
| 7.78E-181 | 1.105751304 | 0.571 | 0.13  | 1.45E-176 | 16 | LILRA4    |
| 1.28E-163 | 0.739682596 | 0.717 | 0.266 | 2.38E-159 | 16 | PIGR      |
| 3.04E-163 | 0.699111976 | 0.932 | 0.598 | 5.66E-159 | 16 | CD99      |
| 6.26E-151 | 0.626486719 | 0.882 | 0.486 | 1.17E-146 | 16 | RNH1      |
| 2.27E-146 | 0.514640343 | 0.989 | 0.818 | 4.24E-142 | 16 | RHOA      |
| 1.05E-143 | 0.604853196 | 0.81  | 0.398 | 1.96E-139 | 16 | RGS10     |
| 2.99E-141 | 0.606686197 | 0.989 | 0.831 | 5.57E-137 | 16 | PFN1      |
| 4.26E-140 | 0.804233427 | 0.986 | 0.883 | 7.95E-136 | 16 | VIM       |
| 4.79E-136 | 0.690640657 | 0.852 | 0.513 | 8.93E-132 | 16 | GRN       |
| 6.46E-134 | 0.761885109 | 0.852 | 0.466 | 1.20E-129 | 16 | TUBB      |
| 2.09E-127 | 0.571262397 | 0.802 | 0.413 | 3.91E-123 | 16 | NME2      |
| 3.49E-126 | 0.982282813 | 0.494 | 0.137 | 6.50E-122 | 16 | FABP5     |
| 1.84E-124 | 0.600670334 | 0.949 | 0.709 | 3.44E-120 | 16 | COTL1     |
| 4.05E-123 | 0.487214352 | 0.934 | 0.66  | 7.54E-119 | 16 | UQCRH     |
| 5.71E-122 | 0.517193753 | 0.481 | 0.132 | 1.06E-117 | 16 | PDCD1     |
| 8.66E-121 | 0.420410791 | 0.617 | 0.223 | 1.61E-116 | 16 | ABRACL    |
| 9.01E-121 | 0.596130444 | 0.99  | 0.843 | 1.68E-116 | 16 | SH3BGRL3  |
| 2.52E-120 | 0.525216009 | 0.994 | 0.891 | 4.70E-116 | 16 | HNRNPA1   |
| 4.94E-120 | 0.520187561 | 0.859 | 0.494 | 9.22E-116 | 16 | COX5A     |
| 5.10E-120 | 0.484406705 | 0.622 | 0.236 | 9.50E-116 | 16 | IMPDH2    |
| 9.18E-120 | 0.609762632 | 0.479 | 0.122 | 1.71E-115 | 16 | CST7      |
| 1.05E-118 | 0.576240875 | 0.708 | 0.315 | 1.96E-114 | 16 | YWHAH     |
| 2.26E-118 | 0.520444743 | 0.979 | 0.7   | 4.22E-114 | 16 | RAC2      |
| 3.02E-118 | 0.522957517 | 0.996 | 0.873 | 5.63E-114 | 16 | CFL1      |
| 4.38E-118 | 0.501564841 | 0.803 | 0.389 | 8.16E-114 | 16 | NOP10     |
| 3.71E-116 | 0.993813482 | 0.825 | 0.526 | 6.92E-112 | 16 | LGALS1    |
| 1.47E-115 | 0.482881186 | 0.941 | 0.66  | 2.73E-111 | 16 | MYL12B    |
| 1.17E-112 | 0.54062813  | 0.987 | 0.853 | 2.19E-108 | 16 | NPM1      |
| 4.71E-111 | 0.416548618 | 0.979 | 0.837 | 8.79E-107 | 16 | SLC25A6   |
| 7.36E-110 | 0.368768894 | 0.496 | 0.152 | 1.37E-105 | 16 | WSB2      |
| 1.55E-109 | 0.430978393 | 0.743 | 0.335 | 2.88E-105 | 16 | AP2S1     |
| 5.22E-108 | 0.390540834 | 0.786 | 0.402 | 9.73E-104 | 16 | ARPC1B    |
| 5.56E-108 | 0.491797511 | 0.875 | 0.534 | 1.04E-103 | 16 | PTPN6     |
| 6.63E-108 | 0.500081249 | 0.989 | 0.816 | 1.24E-103 | 16 | HINT1     |
| 1.07E-107 | 0.685398051 | 0.894 | 0.581 | 1.99E-103 | 16 | PKM       |
| 3.08E-107 | 0.533273994 | 0.815 | 0.427 | 5.73E-103 | 16 | ATOX1     |
| 5.59E-107 | 0.484528535 | 0.513 | 0.155 | 1.04E-102 | 16 | COCH      |
| 8.26E-105 | 0.333253984 | 0.459 | 0.134 | 1.54E-100 | 16 | PARVB     |
| 8.88E-105 | 0.527847425 | 0.858 | 0.525 | 1.66E-100 | 16 | ANXA2     |
| 1.79E-103 | 0.768770792 | 0.683 | 0.306 | 3.33E-99  | 16 | LINC01480 |
| 6.13E-103 | 0.682300752 | 0.848 | 0.497 | 1.14E-98  | 16 | ENO1      |
| 2.68E-102 | 0.461772231 | 0.819 | 0.457 | 5.00E-98  | 16 | APOBEC3G  |
| 6.07E-102 | 0.389129654 | 0.989 | 0.852 | 1.13E-97  | 16 | BTF3      |
| 8.57E-101 | 0.870210784 | 0.879 | 0.633 | 1.60E-96  | 16 | S100A4    |
| 2.20E-100 | 0.423619083 | 0.759 | 0.399 | 4.09E-96  | 16 | CSTB      |
| 1.84E-97  | 0.37467696  | 0.688 | 0.321 | 3.44E-93  | 16 | VDAC1     |

|          |             |       |       |          |    |          |
|----------|-------------|-------|-------|----------|----|----------|
| 3.23E-97 | 0.438513325 | 0.702 | 0.334 | 6.03E-93 | 16 | BANF1    |
| 8.30E-97 | 0.355213157 | 0.674 | 0.302 | 1.55E-92 | 16 | TWF2     |
| 1.37E-96 | 0.462116294 | 0.594 | 0.25  | 2.55E-92 | 16 | SIT1     |
| 2.16E-96 | 0.586425422 | 0.962 | 0.72  | 4.02E-92 | 16 | MIF      |
| 2.58E-96 | 0.396465595 | 0.581 | 0.245 | 4.80E-92 | 16 | RGS19    |
| 8.25E-96 | 0.582968553 | 0.882 | 0.556 | 1.54E-91 | 16 | TPI1     |
| 2.55E-95 | 0.565560309 | 0.825 | 0.471 | 4.76E-91 | 16 | PGAM1    |
| 2.03E-93 | 0.41829649  | 0.97  | 0.756 | 3.79E-89 | 16 | SYNGR2   |
| 1.38E-90 | 0.362041677 | 0.69  | 0.341 | 2.58E-86 | 16 | SEM1     |
| 1.64E-90 | 0.309873618 | 0.542 | 0.202 | 3.07E-86 | 16 | PPA1     |
| 1.42E-89 | 0.378697575 | 0.714 | 0.353 | 2.65E-85 | 16 | APOBEC3C |
| 2.16E-89 | 0.301963517 | 0.687 | 0.346 | 4.02E-85 | 16 | MPG      |
| 6.56E-89 | 0.393432271 | 0.382 | 0.103 | 1.22E-84 | 16 | DRAIC    |
| 2.36E-88 | 0.428334643 | 0.905 | 0.6   | 4.41E-84 | 16 | GPX4     |
| 9.57E-88 | 0.313222897 | 0.786 | 0.425 | 1.78E-83 | 16 | PGLS     |
| 7.33E-87 | 0.327801721 | 0.478 | 0.163 | 1.37E-82 | 16 | RHOC     |
| 1.27E-86 | 0.336034448 | 0.997 | 0.879 | 2.37E-82 | 16 | ATP5F1E  |
| 1.59E-86 | 0.475825527 | 0.942 | 0.728 | 2.97E-82 | 16 | CORO1A   |
| 3.85E-86 | 0.434572194 | 0.568 | 0.224 | 7.18E-82 | 16 | DNPH1    |
| 3.93E-86 | 0.394373323 | 0.826 | 0.462 | 7.33E-82 | 16 | GNG5     |
| 1.81E-85 | 0.326941809 | 0.604 | 0.272 | 3.38E-81 | 16 | C1QBP    |
| 2.80E-85 | 0.387401346 | 0.784 | 0.433 | 5.21E-81 | 16 | GNB2     |
| 3.94E-85 | 0.32375492  | 0.779 | 0.445 | 7.34E-81 | 16 | ATP5MD   |
| 3.98E-85 | 0.283367844 | 0.432 | 0.128 | 7.42E-81 | 16 | SH3BP2   |
| 1.60E-84 | 0.334105146 | 0.835 | 0.458 | 2.98E-80 | 16 | CSK      |
| 2.01E-84 | 0.266288363 | 0.448 | 0.151 | 3.74E-80 | 16 | PRDX3    |
| 1.18E-83 | 0.316899897 | 0.799 | 0.468 | 2.20E-79 | 16 | VAMP8    |
| 2.32E-83 | 0.341310804 | 0.663 | 0.33  | 4.32E-79 | 16 | FKBP1A   |
| 1.36E-82 | 0.519596611 | 0.973 | 0.793 | 2.54E-78 | 16 | YBX1     |
| 3.60E-82 | 0.362801807 | 0.628 | 0.312 | 6.72E-78 | 16 | ZBTB32   |
| 9.14E-82 | 0.323422023 | 0.782 | 0.46  | 1.70E-77 | 16 | ATP5MF   |
| 1.02E-81 | 0.25659334  | 0.433 | 0.145 | 1.91E-77 | 16 | SPN      |
| 3.47E-81 | 0.445617993 | 0.937 | 0.684 | 6.46E-77 | 16 | RAN      |
| 4.94E-81 | 0.362590097 | 0.625 | 0.294 | 9.21E-77 | 16 | TXN      |
| 5.93E-81 | 0.302903889 | 0.568 | 0.244 | 1.11E-76 | 16 | TP53I11  |
| 8.86E-81 | 0.279027171 | 0.301 | 0.06  | 1.65E-76 | 16 | C3orf14  |
| 2.04E-80 | 0.395097415 | 0.897 | 0.618 | 3.80E-76 | 16 | SLC25A5  |
| 3.64E-80 | 0.416502286 | 0.88  | 0.575 | 6.79E-76 | 16 | PRDX1    |
| 8.70E-80 | 0.422135511 | 0.848 | 0.512 | 1.62E-75 | 16 | NDUFV2   |
| 1.15E-79 | 0.278624384 | 0.524 | 0.218 | 2.14E-75 | 16 | FERMT3   |
| 1.52E-79 | 0.41612017  | 0.79  | 0.46  | 2.83E-75 | 16 | CAPG     |
| 1.63E-79 | 0.287434975 | 0.466 | 0.161 | 3.03E-75 | 16 | DCTPP1   |
| 2.08E-79 | 0.363592898 | 0.961 | 0.682 | 3.87E-75 | 16 | PCBP1    |
| 4.21E-79 | 0.545494085 | 0.867 | 0.628 | 7.84E-75 | 16 | PLP2     |
| 6.43E-79 | 0.334440641 | 0.748 | 0.405 | 1.20E-74 | 16 | TBCB     |
| 9.59E-79 | 0.299927726 | 0.721 | 0.376 | 1.79E-74 | 16 | SHMT2    |

|          |             |       |       |          |    |          |
|----------|-------------|-------|-------|----------|----|----------|
| 1.57E-77 | 0.354293066 | 0.984 | 0.796 | 2.93E-73 | 16 | ATP5MC2  |
| 2.31E-77 | 0.383527449 | 0.705 | 0.39  | 4.30E-73 | 16 | CTSZ     |
| 6.29E-77 | 0.388024418 | 0.376 | 0.118 | 1.17E-72 | 16 | MYL9     |
| 7.73E-77 | 0.263274674 | 0.504 | 0.199 | 1.44E-72 | 16 | TRAF7    |
| 1.54E-76 | 0.402482579 | 0.606 | 0.305 | 2.86E-72 | 16 | ATF5     |
| 2.31E-76 | 0.413656647 | 0.749 | 0.436 | 4.31E-72 | 16 | LDHB     |
| 2.73E-76 | 0.254460773 | 0.532 | 0.227 | 5.09E-72 | 16 | IRF5     |
| 2.90E-76 | 0.290572637 | 0.967 | 0.757 | 5.40E-72 | 16 | ATP5MG   |
| 3.16E-76 | 0.887732298 | 0.273 | 0.057 | 5.88E-72 | 16 | CCL3     |
| 3.51E-76 | 0.303377269 | 0.76  | 0.422 | 6.54E-72 | 16 | ARF6     |
| 6.69E-76 | 0.308951943 | 0.735 | 0.392 | 1.25E-71 | 16 | PRDX5    |
| 1.78E-75 | 0.312351575 | 0.55  | 0.225 | 3.33E-71 | 16 | PYCARD   |
| 3.74E-75 | 0.347245833 | 0.6   | 0.278 | 6.97E-71 | 16 | WARS     |
| 6.45E-75 | 0.620442159 | 0.248 | 0.039 | 1.20E-70 | 16 | IL4I1    |
| 2.42E-74 | 0.26984096  | 0.856 | 0.551 | 4.52E-70 | 16 | ATP5F1D  |
| 1.26E-72 | 0.281955343 | 0.726 | 0.395 | 2.35E-68 | 16 | MDH2     |
| 1.57E-72 | 0.281630402 | 0.715 | 0.371 | 2.93E-68 | 16 | APEX1    |
| 1.68E-72 | 0.294606532 | 0.481 | 0.19  | 3.14E-68 | 16 | CCND2    |
| 2.26E-72 | 0.254662009 | 0.251 | 0.047 | 4.22E-68 | 16 | PDPN     |
| 2.37E-72 | 0.452303708 | 0.971 | 0.785 | 4.42E-68 | 16 | PPDPF    |
| 2.66E-72 | 0.312574118 | 0.636 | 0.29  | 4.95E-68 | 16 | MRPL51   |
| 3.21E-72 | 0.377711819 | 0.26  | 0.052 | 5.99E-68 | 16 | MGLL     |
| 1.21E-71 | 0.426732853 | 0.64  | 0.317 | 2.26E-67 | 16 | NHP2     |
| 1.64E-71 | 0.314844684 | 0.782 | 0.451 | 3.05E-67 | 16 | DAD1     |
| 2.57E-71 | 0.277751308 | 0.509 | 0.201 | 4.79E-67 | 16 | PRKCD    |
| 2.83E-71 | 0.398103313 | 0.922 | 0.673 | 5.28E-67 | 16 | MYL12A   |
| 4.39E-71 | 0.594012175 | 0.334 | 0.094 | 8.18E-67 | 16 | MS4A6A   |
| 4.45E-71 | 0.374325638 | 0.907 | 0.636 | 8.29E-67 | 16 | COX6C    |
| 4.56E-71 | 0.576953561 | 0.965 | 0.799 | 8.50E-67 | 16 | S100A6   |
| 1.96E-70 | 0.391108979 | 0.992 | 0.874 | 3.66E-66 | 16 | MYL6     |
| 2.10E-70 | 0.312415965 | 0.75  | 0.414 | 3.91E-66 | 16 | RBX1     |
| 2.20E-70 | 0.296557154 | 0.766 | 0.42  | 4.10E-66 | 16 | BRK1     |
| 5.03E-70 | 0.342326641 | 0.655 | 0.326 | 9.38E-66 | 16 | ATP5MC1  |
| 6.13E-70 | 1.09469947  | 0.794 | 0.485 | 1.14E-65 | 16 | APH1A    |
| 4.17E-69 | 0.277999653 | 0.602 | 0.279 | 7.77E-65 | 16 | NDUFAB1  |
| 5.01E-69 | 0.267646194 | 0.597 | 0.274 | 9.35E-65 | 16 | GBP2     |
| 9.94E-68 | 0.375804151 | 0.203 | 0.03  | 1.85E-63 | 16 | CD1C     |
| 2.03E-66 | 0.348885239 | 0.84  | 0.54  | 3.78E-62 | 16 | PARK7    |
| 6.69E-66 | 0.271961977 | 0.73  | 0.402 | 1.25E-61 | 16 | ATP6V1F  |
| 1.94E-65 | 0.331979371 | 0.788 | 0.449 | 3.62E-61 | 16 | NDUFB2   |
| 2.02E-65 | 0.280612742 | 0.682 | 0.337 | 3.76E-61 | 16 | C19orf70 |
| 3.36E-65 | 0.306488743 | 0.939 | 0.72  | 6.27E-61 | 16 | SLC25A3  |
| 6.58E-65 | 0.280610625 | 0.813 | 0.478 | 1.23E-60 | 16 | ARF5     |
| 2.25E-64 | 0.309731311 | 0.82  | 0.506 | 4.20E-60 | 16 | COX8A    |
| 2.33E-64 | 0.316169818 | 0.866 | 0.546 | 4.34E-60 | 16 | PPP1CA   |
| 4.07E-64 | 0.310099965 | 0.551 | 0.234 | 7.58E-60 | 16 | TKT      |

|          |             |       |       |          |    |          |
|----------|-------------|-------|-------|----------|----|----------|
| 4.98E-64 | 0.284165303 | 0.719 | 0.401 | 9.28E-60 | 16 | CCT3     |
| 1.54E-63 | 0.29877648  | 0.739 | 0.426 | 2.87E-59 | 16 | ATP5PF   |
| 2.18E-63 | 0.985511166 | 0.782 | 0.48  | 4.06E-59 | 16 | ENSA     |
| 6.05E-63 | 0.294017998 | 0.721 | 0.387 | 1.13E-58 | 16 | SEC61G   |
| 7.74E-63 | 0.37586246  | 0.714 | 0.409 | 1.44E-58 | 16 | TSPO     |
| 8.23E-63 | 0.289248461 | 0.406 | 0.157 | 1.53E-58 | 16 | SEMA7A   |
| 1.37E-62 | 0.336381025 | 0.679 | 0.373 | 2.56E-58 | 16 | NFATC1   |
| 1.70E-62 | 0.419605504 | 0.961 | 0.784 | 3.17E-58 | 16 | FXYD5    |
| 1.55E-61 | 0.331010467 | 0.817 | 0.512 | 2.90E-57 | 16 | RAC1     |
| 2.48E-61 | 0.307828255 | 0.907 | 0.613 | 4.62E-57 | 16 | COX6B1   |
| 3.41E-61 | 0.258405396 | 0.578 | 0.277 | 6.36E-57 | 16 | PDCD5    |
| 7.59E-61 | 0.259520708 | 0.736 | 0.415 | 1.42E-56 | 16 | UQCRQ    |
| 1.63E-60 | 0.377300017 | 0.727 | 0.42  | 3.04E-56 | 16 | RHOB     |
| 1.91E-60 | 0.410462046 | 0.687 | 0.383 | 3.57E-56 | 16 | PSME2    |
| 2.42E-60 | 0.264255682 | 0.512 | 0.218 | 4.50E-56 | 16 | PHB      |
| 2.52E-60 | 0.373134958 | 0.448 | 0.211 | 4.71E-56 | 16 | CD72     |
| 3.24E-60 | 0.364571451 | 0.799 | 0.495 | 6.04E-56 | 16 | SELENOH  |
| 6.82E-60 | 0.274302481 | 0.684 | 0.373 | 1.27E-55 | 16 | VASP     |
| 2.08E-59 | 0.324199879 | 0.772 | 0.435 | 3.88E-55 | 16 | APRT     |
| 3.22E-59 | 0.308914002 | 0.81  | 0.488 | 6.00E-55 | 16 | PRELID1  |
| 2.21E-58 | 0.25001579  | 0.449 | 0.17  | 4.12E-54 | 16 | SLC35B2  |
| 6.46E-58 | 0.330451751 | 0.862 | 0.591 | 1.20E-53 | 16 | SSR4     |
| 2.66E-57 | 0.292276861 | 0.26  | 0.067 | 4.96E-53 | 16 | BIK      |
| 2.79E-57 | 0.483428155 | 0.858 | 0.68  | 5.21E-53 | 16 | EMP3     |
| 2.80E-57 | 0.276510106 | 0.836 | 0.55  | 5.21E-53 | 16 | PSMA7    |
| 9.10E-57 | 0.288477847 | 0.747 | 0.446 | 1.70E-52 | 16 | PSMB3    |
| 1.07E-56 | 0.284426302 | 0.649 | 0.353 | 2.00E-52 | 16 | FDFT1    |
| 1.49E-56 | 0.292951855 | 0.95  | 0.766 | 2.78E-52 | 16 | ARPC2    |
| 2.44E-56 | 0.306904237 | 0.982 | 0.863 | 4.54E-52 | 16 | UCP2     |
| 1.02E-55 | 0.251663608 | 0.843 | 0.523 | 1.91E-51 | 16 | CUTA     |
| 2.35E-55 | 0.259944285 | 0.755 | 0.437 | 4.38E-51 | 16 | AP2M1    |
| 7.56E-55 | 0.290405778 | 0.742 | 0.4   | 1.41E-50 | 16 | DDOST    |
| 8.79E-55 | 0.323206048 | 0.603 | 0.288 | 1.64E-50 | 16 | RANBP1   |
| 4.92E-54 | 0.274383987 | 0.807 | 0.516 | 9.17E-50 | 16 | ATP5MC3  |
| 5.56E-54 | 0.263700471 | 0.165 | 0.023 | 1.04E-49 | 16 | ACY3     |
| 1.86E-53 | 0.292709557 | 0.812 | 0.483 | 3.46E-49 | 16 | ALDOA    |
| 2.38E-53 | 0.919641244 | 0.269 | 0.075 | 4.44E-49 | 16 | CCL4     |
| 3.17E-53 | 0.277272302 | 0.741 | 0.411 | 5.92E-49 | 16 | NPC2     |
| 7.29E-53 | 0.251570643 | 0.373 | 0.152 | 1.36E-48 | 16 | CD68     |
| 4.65E-52 | 0.254896728 | 0.883 | 0.62  | 8.67E-48 | 16 | EIF3E    |
| 1.58E-51 | 0.270049281 | 0.949 | 0.729 | 2.94E-47 | 16 | OST4     |
| 3.09E-51 | 0.433549648 | 0.591 | 0.333 | 5.76E-47 | 16 | MIR155HG |
| 5.77E-51 | 0.256642585 | 0.897 | 0.62  | 1.08E-46 | 16 | HIGD2A   |
| 9.17E-51 | 0.326374275 | 0.875 | 0.588 | 1.71E-46 | 16 | COX6A1   |
| 1.15E-50 | 0.29106955  | 0.784 | 0.494 | 2.15E-46 | 16 | MRPS21   |
| 2.17E-50 | 0.273325436 | 0.827 | 0.536 | 4.05E-46 | 16 | TRMT112  |

|          |             |       |       |          |    |          |
|----------|-------------|-------|-------|----------|----|----------|
| 2.21E-50 | 0.275735399 | 0.864 | 0.558 | 4.12E-46 | 16 | ELOB     |
| 3.68E-50 | 0.386746103 | 0.841 | 0.577 | 6.85E-46 | 16 | CD27     |
| 9.25E-50 | 0.255761349 | 0.668 | 0.342 | 1.72E-45 | 16 | TALDO1   |
| 9.28E-50 | 0.281100776 | 0.751 | 0.455 | 1.73E-45 | 16 | IFITM2   |
| 1.27E-49 | 0.252828502 | 0.886 | 0.631 | 2.36E-45 | 16 | SOD1     |
| 6.10E-49 | 0.285591066 | 0.862 | 0.589 | 1.14E-44 | 16 | GDI2     |
| 3.82E-48 | 0.255890223 | 0.805 | 0.482 | 7.12E-44 | 16 | WDR83OS  |
| 4.61E-48 | 0.398014969 | 0.966 | 0.848 | 8.59E-44 | 16 | HLA-DRB5 |
| 5.35E-48 | 0.268160494 | 0.934 | 0.688 | 9.96E-44 | 16 | PPIB     |
| 3.55E-47 | 0.300153094 | 0.712 | 0.408 | 6.61E-43 | 16 | LDHA     |
| 5.78E-46 | 0.256368324 | 0.962 | 0.775 | 1.08E-41 | 16 | CHCHD2   |
| 1.99E-44 | 0.260356434 | 0.629 | 0.355 | 3.71E-40 | 16 | CDK2AP2  |
| 4.23E-43 | 0.586336574 | 0.332 | 0.15  | 7.89E-39 | 16 | SNAPC3   |
| 9.12E-43 | 0.263384662 | 0.984 | 0.82  | 1.70E-38 | 16 | ARPC3    |
| 1.95E-41 | 0.283797471 | 0.984 | 0.881 | 3.63E-37 | 16 | HLA-DQA1 |
| 1.04E-40 | 0.269281889 | 0.716 | 0.44  | 1.94E-36 | 16 | SMIM14   |
| 1.20E-40 | 0.381527793 | 0.382 | 0.18  | 2.25E-36 | 16 | TOR1AIP2 |
| 2.42E-38 | 0.266189204 | 0.578 | 0.359 | 4.51E-34 | 16 | SPIB     |
| 3.65E-38 | 0.256980057 | 0.88  | 0.642 | 6.81E-34 | 16 | SUB1     |
| 3.52E-37 | 0.306097464 | 0.812 | 0.558 | 6.56E-33 | 16 | LBH      |
| 8.26E-37 | 0.282829824 | 0.223 | 0.077 | 1.54E-32 | 16 | ITM2C    |
| 1.16E-36 | 0.449642168 | 0.979 | 0.872 | 2.16E-32 | 16 | HSP90AB1 |
| 3.27E-36 | 0.262510053 | 0.794 | 0.523 | 6.10E-32 | 16 | PDLIM1   |
| 8.66E-36 | 0.307096741 | 0.902 | 0.674 | 1.61E-31 | 16 | TUBA1B   |
| 1.28E-35 | 0.290770257 | 0.17  | 0.041 | 2.38E-31 | 16 | KLK4     |
| 1.88E-35 | 0.314825649 | 0.198 | 0.067 | 3.51E-31 | 16 | AQP3     |
| 2.01E-35 | 0.373677363 | 0.484 | 0.287 | 3.76E-31 | 16 | HLA-DQA2 |
| 5.05E-35 | 0.326802014 | 0.94  | 0.78  | 9.41E-31 | 16 | LSP1     |
| 5.06E-31 | 0.250539194 | 0.845 | 0.593 | 9.44E-27 | 16 | GPSM3    |
| 1.05E-30 | 0.326578794 | 0.504 | 0.333 | 1.97E-26 | 16 | S100A11  |
| 1.58E-28 | 0.280806431 | 0.958 | 0.784 | 2.94E-24 | 16 | PEBP1    |
| 4.56E-25 | 0.295918815 | 0.415 | 0.265 | 8.49E-21 | 16 | RPRD2    |
| 1.30E-24 | 0.435972139 | 0.874 | 0.684 | 2.42E-20 | 16 | MCL1     |
| 1.53E-20 | 0.999910774 | 0.512 | 0.373 | 2.85E-16 | 16 | PSIP1    |
| 0        | 2.607987205 | 0.996 | 0.494 | 0        | 17 | TESC     |
| 0        | 1.928880866 | 0.989 | 0.515 | 0        | 17 | S100A10  |
| 0        | 1.873176014 | 0.98  | 0.288 | 0        | 17 | RHOF     |
| 0        | 1.845875345 | 0.98  | 0.346 | 0        | 17 | CKAP4    |
| 0        | 1.655011825 | 0.761 | 0.029 | 0        | 17 | TNFRSF4  |
| 0        | 1.63205745  | 1     | 0.887 | 0        | 17 | RPS26    |
| 0        | 1.625488079 | 0.977 | 0.294 | 0        | 17 | MAD1L1   |
| 0        | 1.606041082 | 0.877 | 0.03  | 0        | 17 | TNFRSF18 |
| 0        | 1.534440542 | 0.895 | 0.167 | 0        | 17 | CXCL16   |
| 0        | 1.504599033 | 0.937 | 0.323 | 0        | 17 | S100A11  |
| 0        | 1.438395945 | 0.999 | 0.777 | 0        | 17 | SQSTM1   |
| 0        | 1.430054882 | 0.795 | 0.146 | 0        | 17 | DUSP4    |

|           |             |       |       |           |    |          |
|-----------|-------------|-------|-------|-----------|----|----------|
| 0         | 1.428404894 | 0.982 | 0.35  | 0         | 17 | KDM6B    |
| 0         | 1.420948529 | 0.901 | 0.1   | 0         | 17 | NINJ1    |
| 0         | 1.383017907 | 0.925 | 0.3   | 0         | 17 | CREM     |
| 0         | 1.365946727 | 0.92  | 0.164 | 0         | 17 | NFKB1    |
| 0         | 1.251197436 | 0.938 | 0.229 | 0         | 17 | ECE1     |
| 0         | 1.222122563 | 0.996 | 0.707 | 0         | 17 | SRGN     |
| 0         | 1.168424468 | 0.968 | 0.528 | 0         | 17 | NR3C1    |
| 0         | 1.144116247 | 0.978 | 0.453 | 0         | 17 | FNBP1    |
| 0         | 1.109792443 | 0.901 | 0.227 | 0         | 17 | SLC7A5   |
| 0         | 1.101520839 | 0.707 | 0.093 | 0         | 17 | AKAP12   |
| 0         | 1.050909115 | 0.962 | 0.41  | 0         | 17 | TGFB1    |
| 0         | 1.050686361 | 0.98  | 0.383 | 0         | 17 | PIM3     |
| 0         | 1.049801976 | 0.968 | 0.34  | 0         | 17 | NFKB2    |
| 0         | 1.049692131 | 0.962 | 0.406 | 0         | 17 | SLC3A2   |
| 0         | 1.047993333 | 0.929 | 0.313 | 0         | 17 | LDLRAD4  |
| 0         | 1.037249547 | 0.909 | 0.334 | 0         | 17 | SLBP     |
| 0         | 1.03671928  | 0.958 | 0.429 | 0         | 17 | HSPD1    |
| 0         | 1.02392889  | 0.991 | 0.564 | 0         | 17 | GNG2     |
| 0         | 1.017408593 | 0.891 | 0.283 | 0         | 17 | BHLHE40  |
| 0         | 1.014733896 | 1     | 0.883 | 0         | 17 | VIM      |
| 0         | 0.992645554 | 0.998 | 0.756 | 0         | 17 | SYNGR2   |
| 0         | 0.989042531 | 0.884 | 0.248 | 0         | 17 | KDM2B    |
| 0         | 0.988097357 | 1     | 0.798 | 0         | 17 | TAGLN2   |
| 0         | 0.979496363 | 0.902 | 0.276 | 0         | 17 | ANKLE2   |
| 0         | 0.97369262  | 0.943 | 0.301 | 0         | 17 | MAP2K3   |
| 0         | 0.934507817 | 0.854 | 0.141 | 0         | 17 | SLCO4A1  |
| 0         | 0.923995629 | 1     | 0.876 | 0         | 17 | EZR      |
| 0         | 0.919254124 | 0.884 | 0.273 | 0         | 17 | MARCKSL1 |
| 0         | 0.893677295 | 0.828 | 0.176 | 0         | 17 | CD58     |
| 0         | 0.881002349 | 0.685 | 0.058 | 0         | 17 | TCF7     |
| 0         | 0.880541924 | 0.84  | 0.197 | 0         | 17 | NCOR2    |
| 0         | 0.878201154 | 0.76  | 0.102 | 0         | 17 | PDE4A    |
| 0         | 0.85368442  | 0.877 | 0.21  | 0         | 17 | SLC16A3  |
| 0         | 0.852337451 | 0.822 | 0.164 | 0         | 17 | RFTN1    |
| 0         | 0.834357794 | 0.864 | 0.199 | 0         | 17 | ST14     |
| 0         | 0.818898427 | 0.782 | 0.149 | 0         | 17 | SEMA7A   |
| 0         | 0.817880977 | 0.788 | 0.128 | 0         | 17 | MYADM    |
| 0         | 0.809252191 | 0.913 | 0.352 | 0         | 17 | CMTM6    |
| 0         | 0.802425879 | 0.85  | 0.252 | 0         | 17 | RUNX3    |
| 0         | 0.729044766 | 0.711 | 0.074 | 0         | 17 | BICDL1   |
| 1.19E-306 | 1.015332219 | 0.993 | 0.463 | 2.22E-302 | 17 | LMNA     |
| 1.11E-304 | 0.808080986 | 0.854 | 0.234 | 2.06E-300 | 17 | BCL2L11  |
| 2.29E-300 | 0.976769906 | 0.904 | 0.364 | 4.27E-296 | 17 | HMGA1    |
| 2.92E-298 | 0.861686814 | 0.964 | 0.464 | 5.45E-294 | 17 | SNX9     |
| 9.97E-297 | 1.062442328 | 0.992 | 0.66  | 1.86E-292 | 17 | CCR7     |
| 8.55E-296 | 0.732421222 | 0.54  | 0.014 | 1.59E-291 | 17 | ATP6V1C2 |

|           |             |       |       |           |    |          |
|-----------|-------------|-------|-------|-----------|----|----------|
| 2.00E-294 | 0.680188797 | 0.723 | 0.129 | 3.72E-290 | 17 | SH3PXD2A |
| 3.24E-288 | 0.847014872 | 0.923 | 0.361 | 6.05E-284 | 17 | KDM4B    |
| 1.27E-285 | 0.750518354 | 0.692 | 0.109 | 2.37E-281 | 17 | ARHGAP31 |
| 1.90E-285 | 0.772525651 | 0.867 | 0.284 | 3.53E-281 | 17 | GNA13    |
| 2.16E-285 | 0.613183038 | 0.655 | 0.084 | 4.02E-281 | 17 | IRAK2    |
| 2.19E-285 | 0.920456295 | 0.988 | 0.615 | 4.08E-281 | 17 | LRRFIP1  |
| 1.75E-283 | 1.19702886  | 0.727 | 0.166 | 3.27E-279 | 17 | NMB      |
| 4.81E-283 | 0.747271506 | 0.689 | 0.117 | 8.96E-279 | 17 | TACC3    |
| 1.98E-282 | 0.814960838 | 0.593 | 0.05  | 3.70E-278 | 17 | CCND1    |
| 4.90E-277 | 0.770343857 | 0.771 | 0.194 | 9.14E-273 | 17 | TLE3     |
| 1.58E-276 | 0.841498874 | 0.871 | 0.294 | 2.95E-272 | 17 | PPP1CB   |
| 4.57E-275 | 0.606441178 | 0.747 | 0.173 | 8.53E-271 | 17 | HGSNAT   |
| 2.88E-274 | 0.696472087 | 0.749 | 0.166 | 5.38E-270 | 17 | ITPKB    |
| 5.86E-269 | 0.584581051 | 0.526 | 0.021 | 1.09E-264 | 17 | SIRPA    |
| 1.17E-268 | 0.648125307 | 0.884 | 0.295 | 2.18E-264 | 17 | RARA     |
| 2.72E-268 | 0.675956919 | 0.903 | 0.278 | 5.07E-264 | 17 | HLA-DQA2 |
| 1.01E-267 | 0.642621786 | 0.489 | 0.004 | 1.88E-263 | 17 | RAMP1    |
| 4.65E-267 | 0.679890479 | 0.908 | 0.367 | 8.67E-263 | 17 | RHOG     |
| 4.46E-266 | 0.801787503 | 0.968 | 0.494 | 8.31E-262 | 17 | EHMT1    |
| 6.75E-263 | 0.894122336 | 0.959 | 0.464 | 1.26E-258 | 17 | GPR183   |
| 8.78E-262 | 0.569677578 | 0.691 | 0.154 | 1.64E-257 | 17 | IRF2BPL  |
| 2.12E-258 | 0.837073846 | 0.938 | 0.465 | 3.96E-254 | 17 | HSPE1    |
| 4.75E-258 | 0.642864399 | 0.798 | 0.221 | 8.86E-254 | 17 | RAPGEF1  |
| 4.32E-257 | 0.641664334 | 0.872 | 0.283 | 8.06E-253 | 17 | ARID5A   |
| 3.75E-256 | 0.579669418 | 0.568 | 0.062 | 6.99E-252 | 17 | ZFH3     |
| 1.66E-252 | 0.722903615 | 0.975 | 0.619 | 3.10E-248 | 17 | NEAT1    |
| 3.07E-250 | 0.582667631 | 0.668 | 0.132 | 5.71E-246 | 17 | RHBDF2   |
| 4.34E-250 | 0.775818545 | 0.974 | 0.599 | 8.09E-246 | 17 | GPX4     |
| 1.37E-246 | 0.555215747 | 0.664 | 0.125 | 2.56E-242 | 17 | INF2     |
| 8.65E-246 | 0.880754604 | 0.871 | 0.332 | 1.61E-241 | 17 | SERPINB9 |
| 6.87E-245 | 0.601547463 | 0.769 | 0.2   | 1.28E-240 | 17 | ADAM8    |
| 2.87E-244 | 0.620153751 | 0.748 | 0.166 | 5.35E-240 | 17 | JOSD1    |
| 6.67E-244 | 0.725358387 | 0.934 | 0.438 | 1.24E-239 | 17 | MBP      |
| 1.85E-243 | 0.545790386 | 0.619 | 0.098 | 3.45E-239 | 17 | CERK     |
| 7.51E-242 | 0.996895628 | 0.483 | 0.013 | 1.40E-237 | 17 | CD7      |
| 1.16E-241 | 0.646437392 | 0.822 | 0.259 | 2.17E-237 | 17 | SNX8     |
| 5.38E-240 | 0.769201628 | 0.538 | 0.053 | 1.00E-235 | 17 | RASSF6   |
| 1.67E-238 | 0.503215593 | 0.642 | 0.125 | 3.11E-234 | 17 | AGO2     |
| 1.53E-237 | 0.619040913 | 0.857 | 0.259 | 2.86E-233 | 17 | SKIL     |
| 7.41E-237 | 0.536909553 | 0.653 | 0.122 | 1.38E-232 | 17 | SH2B3    |
| 3.03E-236 | 0.537765395 | 0.674 | 0.139 | 5.65E-232 | 17 | TARS     |
| 5.45E-234 | 0.479518787 | 0.492 | 0.023 | 1.02E-229 | 17 | SLC12A7  |
| 1.07E-233 | 0.633236129 | 0.709 | 0.165 | 1.99E-229 | 17 | ARID3A   |
| 3.02E-232 | 0.690680565 | 0.985 | 0.625 | 5.63E-228 | 17 | ATP5F1B  |
| 2.85E-231 | 0.493617295 | 0.699 | 0.161 | 5.32E-227 | 17 | SNED1    |
| 4.46E-229 | 0.55867165  | 0.777 | 0.208 | 8.31E-225 | 17 | ZHX2     |

|           |             |       |       |           |    |         |
|-----------|-------------|-------|-------|-----------|----|---------|
| 5.21E-229 | 0.568565458 | 0.627 | 0.113 | 9.71E-225 | 17 | SOCS3   |
| 1.29E-227 | 0.588556045 | 0.861 | 0.339 | 2.40E-223 | 17 | RASSF5  |
| 1.41E-227 | 0.766594237 | 0.792 | 0.253 | 2.63E-223 | 17 | NR4A3   |
| 2.60E-227 | 0.621297408 | 0.715 | 0.17  | 4.84E-223 | 17 | ELL2    |
| 1.55E-226 | 0.512075943 | 0.708 | 0.188 | 2.89E-222 | 17 | TNIP2   |
| 1.04E-225 | 0.458009251 | 0.618 | 0.117 | 1.93E-221 | 17 | SKI     |
| 2.37E-225 | 0.545278785 | 0.983 | 0.682 | 4.41E-221 | 17 | MCL1    |
| 1.28E-224 | 0.543724337 | 0.775 | 0.227 | 2.38E-220 | 17 | MANBA   |
| 2.46E-224 | 0.896745233 | 0.985 | 0.691 | 4.59E-220 | 17 | LITAF   |
| 2.96E-224 | 0.602840575 | 0.667 | 0.128 | 5.51E-220 | 17 | FAM49A  |
| 3.65E-224 | 0.696353702 | 0.664 | 0.154 | 6.81E-220 | 17 | PPIF    |
| 1.40E-223 | 0.562181668 | 0.756 | 0.218 | 2.62E-219 | 17 | GALNT2  |
| 4.82E-222 | 0.650284834 | 0.886 | 0.376 | 8.99E-218 | 17 | CD5     |
| 7.67E-222 | 0.728815622 | 0.67  | 0.173 | 1.43E-217 | 17 | TRAF1   |
| 1.40E-221 | 0.495716554 | 0.628 | 0.12  | 2.61E-217 | 17 | RANGAP1 |
| 8.70E-220 | 0.463844203 | 0.603 | 0.105 | 1.62E-215 | 17 | VAV2    |
| 1.06E-219 | 0.484556005 | 0.523 | 0.073 | 1.98E-215 | 17 | ELK3    |
| 1.31E-219 | 0.635761813 | 0.811 | 0.273 | 2.44E-215 | 17 | LPXN    |
| 1.56E-218 | 0.591899054 | 0.75  | 0.203 | 2.91E-214 | 17 | NDRG1   |
| 2.98E-218 | 0.402689776 | 0.482 | 0.041 | 5.55E-214 | 17 | VASH1   |
| 3.99E-218 | 0.522962228 | 0.609 | 0.104 | 7.44E-214 | 17 | PLEKHG2 |
| 2.31E-216 | 0.610717201 | 0.959 | 0.482 | 4.31E-212 | 17 | TUBB4B  |
| 7.07E-216 | 0.495812833 | 0.709 | 0.183 | 1.32E-211 | 17 | FLNB    |
| 1.97E-215 | 0.701482308 | 0.972 | 0.596 | 3.68E-211 | 17 | ARID5B  |
| 1.49E-214 | 0.872564455 | 0.848 | 0.355 | 2.78E-210 | 17 | IGFBP4  |
| 1.51E-214 | 0.386348219 | 0.414 | 0.008 | 2.82E-210 | 17 | CRIM1   |
| 5.59E-213 | 0.616162085 | 0.996 | 0.719 | 1.04E-208 | 17 | SLC25A3 |
| 1.75E-211 | 0.595412734 | 0.82  | 0.305 | 3.26E-207 | 17 | EHD1    |
| 2.19E-211 | 0.766247202 | 0.919 | 0.468 | 4.08E-207 | 17 | RILPL2  |
| 4.41E-211 | 0.412848907 | 0.521 | 0.058 | 8.22E-207 | 17 | GRK5    |
| 8.67E-210 | 0.655459352 | 0.801 | 0.275 | 1.62E-205 | 17 | TYMP    |
| 5.08E-209 | 0.506314476 | 0.643 | 0.126 | 9.48E-205 | 17 | RALGDS  |
| 5.54E-209 | 0.711780518 | 0.984 | 0.717 | 1.03E-204 | 17 | REL     |
| 5.98E-208 | 0.51452144  | 0.981 | 0.444 | 1.11E-203 | 17 | CDKN1A  |
| 3.23E-207 | 0.534871623 | 0.815 | 0.295 | 6.02E-203 | 17 | SDF4    |
| 4.00E-207 | 0.613833535 | 0.801 | 0.258 | 7.45E-203 | 17 | SLC2A3  |
| 1.01E-206 | 0.695058278 | 0.795 | 0.305 | 1.89E-202 | 17 | SPI1    |
| 1.55E-206 | 0.597803932 | 0.634 | 0.139 | 2.88E-202 | 17 | AGPAT2  |
| 2.21E-205 | 0.681968259 | 0.959 | 0.523 | 4.12E-201 | 17 | ANXA2   |
| 2.91E-205 | 0.445215878 | 0.454 | 0.033 | 5.42E-201 | 17 | TRPV3   |
| 7.05E-205 | 0.713041403 | 0.89  | 0.387 | 1.31E-200 | 17 | SYAP1   |
| 4.17E-203 | 0.600553976 | 0.764 | 0.248 | 7.77E-199 | 17 | CHMP4B  |
| 1.95E-202 | 0.5198214   | 0.653 | 0.159 | 3.64E-198 | 17 | LAT2    |
| 3.55E-200 | 0.528663458 | 0.735 | 0.206 | 6.61E-196 | 17 | TCP11L2 |
| 8.93E-200 | 0.56285182  | 0.994 | 0.677 | 1.66E-195 | 17 | EMP3    |
| 1.25E-198 | 0.509000467 | 0.661 | 0.186 | 2.33E-194 | 17 | CCND2   |



|           |             |       |       |           |    |          |
|-----------|-------------|-------|-------|-----------|----|----------|
| 4.07E-198 | 0.68218948  | 0.981 | 0.632 | 7.58E-194 | 17 | CD44     |
| 5.46E-197 | 0.442254867 | 0.501 | 0.059 | 1.02E-192 | 17 | GRAMD4   |
| 1.52E-196 | 0.533332007 | 0.729 | 0.216 | 2.83E-192 | 17 | PRNP     |
| 2.42E-195 | 0.50147957  | 0.794 | 0.267 | 4.52E-191 | 17 | CYSTM1   |
| 3.31E-195 | 0.467934603 | 0.695 | 0.2   | 6.17E-191 | 17 | RASSF2   |
| 4.77E-195 | 0.671738511 | 0.859 | 0.396 | 8.89E-191 | 17 | COL9A3   |
| 2.20E-194 | 1.03520503  | 0.7   | 0.257 | 4.10E-190 | 17 | MX1      |
| 1.02E-193 | 0.489201181 | 0.701 | 0.218 | 1.89E-189 | 17 | MTHFD2   |
| 4.90E-193 | 0.413133342 | 0.447 | 0.052 | 9.13E-189 | 17 | CCR6     |
| 1.59E-192 | 0.767955001 | 0.97  | 0.744 | 2.96E-188 | 17 | HIST1H4C |
| 6.32E-192 | 0.711672756 | 0.859 | 0.343 | 1.18E-187 | 17 | PLEC     |
| 2.71E-191 | 0.547811725 | 0.953 | 0.492 | 5.05E-187 | 17 | RAP1B    |
| 1.71E-190 | 0.553506424 | 0.987 | 0.624 | 3.20E-186 | 17 | HERPUD1  |
| 5.77E-190 | 0.439166721 | 0.658 | 0.176 | 1.08E-185 | 17 | ARRDC2   |
| 1.21E-189 | 0.532261388 | 0.88  | 0.376 | 2.25E-185 | 17 | FAM177A1 |
| 1.78E-189 | 0.443858938 | 0.574 | 0.101 | 3.32E-185 | 17 | SLC7A1   |
| 2.12E-189 | 0.44770548  | 0.781 | 0.266 | 3.96E-185 | 17 | MARS     |
| 2.73E-188 | 0.44039247  | 0.808 | 0.28  | 5.09E-184 | 17 | SIPA1L1  |
| 1.92E-186 | 0.404083207 | 0.56  | 0.101 | 3.58E-182 | 17 | TMEM245  |
| 2.32E-186 | 0.866717914 | 0.761 | 0.302 | 4.33E-182 | 17 | ACP5     |
| 2.41E-186 | 0.590247363 | 0.873 | 0.359 | 4.49E-182 | 17 | NFE2L2   |
| 2.66E-186 | 0.452476935 | 0.737 | 0.233 | 4.95E-182 | 17 | PLEKHB2  |
| 2.56E-182 | 0.363563322 | 0.456 | 0.06  | 4.76E-178 | 17 | SGPP2    |
| 2.98E-182 | 0.506254062 | 0.714 | 0.209 | 5.55E-178 | 17 | GGA3     |
| 4.03E-182 | 0.519023528 | 0.998 | 0.799 | 7.51E-178 | 17 | SARAF    |
| 5.75E-182 | 0.584955466 | 0.81  | 0.308 | 1.07E-177 | 17 | TACC1    |
| 2.40E-181 | 0.408862466 | 0.588 | 0.11  | 4.47E-177 | 17 | ABR      |
| 3.40E-181 | 0.354158548 | 0.481 | 0.062 | 6.35E-177 | 17 | GNA12    |
| 3.60E-180 | 0.605791673 | 0.79  | 0.298 | 6.72E-176 | 17 | FAM107B  |
| 4.86E-180 | 0.436119992 | 0.862 | 0.367 | 9.05E-176 | 17 | CSNK1D   |
| 3.32E-179 | 0.431798608 | 0.65  | 0.178 | 6.19E-175 | 17 | BORCS5   |
| 1.44E-178 | 0.397426898 | 0.648 | 0.167 | 2.69E-174 | 17 | MTMR6    |
| 2.28E-178 | 0.449909088 | 0.924 | 0.461 | 4.26E-174 | 17 | PLEKHG1  |
| 2.78E-177 | 0.447162176 | 0.573 | 0.126 | 5.18E-173 | 17 | CBX6     |
| 2.82E-177 | 0.454006581 | 0.687 | 0.197 | 5.26E-173 | 17 | TUBA1C   |
| 2.89E-177 | 0.326285583 | 0.998 | 0.671 | 5.38E-173 | 17 | CD83     |
| 1.13E-176 | 0.372123973 | 0.445 | 0.046 | 2.10E-172 | 17 | UBE2F    |
| 1.17E-176 | 0.459971425 | 0.562 | 0.108 | 2.18E-172 | 17 | HRK      |
| 1.67E-176 | 0.406697747 | 0.816 | 0.31  | 3.11E-172 | 17 | WASHC4   |
| 5.59E-175 | 0.369036071 | 0.371 | 0.016 | 1.04E-170 | 17 | FAAH2    |
| 9.03E-175 | 0.608231653 | 0.98  | 0.718 | 1.68E-170 | 17 | ISCU     |
| 1.23E-174 | 0.547518406 | 0.707 | 0.235 | 2.29E-170 | 17 | CEP170   |
| 2.73E-174 | 0.693526031 | 0.518 | 0.105 | 5.09E-170 | 17 | GEM      |
| 3.96E-174 | 0.446890339 | 0.444 | 0.04  | 7.38E-170 | 17 | COL18A1  |
| 5.29E-174 | 0.472383194 | 0.764 | 0.283 | 9.86E-170 | 17 | SFT2D1   |
| 2.47E-173 | 0.436743504 | 0.395 | 0.022 | 4.61E-169 | 17 | CMTM7    |

|           |             |       |       |           |    |          |
|-----------|-------------|-------|-------|-----------|----|----------|
| 6.60E-173 | 0.341866376 | 0.467 | 0.073 | 1.23E-168 | 17 | SLC15A4  |
| 9.20E-173 | 0.328017584 | 0.399 | 0.037 | 1.72E-168 | 17 | SLC41A2  |
| 3.21E-172 | 0.353921142 | 0.406 | 0.036 | 5.99E-168 | 17 | CDK5R1   |
| 5.92E-172 | 0.360869337 | 0.472 | 0.064 | 1.10E-167 | 17 | ZSWIM6   |
| 7.47E-172 | 0.451149574 | 0.874 | 0.384 | 1.39E-167 | 17 | G3BP1    |
| 1.54E-171 | 0.391054145 | 0.677 | 0.201 | 2.87E-167 | 17 | MED13L   |
| 1.57E-171 | 0.440357145 | 0.611 | 0.181 | 2.93E-167 | 17 | MALT1    |
| 3.87E-171 | 0.38837181  | 0.648 | 0.182 | 7.22E-167 | 17 | RAB21    |
| 9.45E-170 | 0.504947251 | 0.802 | 0.311 | 1.76E-165 | 17 | MKNK2    |
| 1.05E-169 | 0.517149082 | 0.888 | 0.398 | 1.95E-165 | 17 | ATP2A3   |
| 7.58E-169 | 0.39407805  | 0.623 | 0.164 | 1.41E-164 | 17 | RASA3    |
| 3.74E-168 | 0.448416674 | 0.85  | 0.373 | 6.97E-164 | 17 | CHD4     |
| 3.05E-166 | 0.411682986 | 0.389 | 0.025 | 5.69E-162 | 17 | CHAC1    |
| 1.91E-165 | 0.349485623 | 0.633 | 0.191 | 3.56E-161 | 17 | IL21R    |
| 6.03E-165 | 0.6300033   | 0.956 | 0.574 | 1.12E-160 | 17 | PRDX1    |
| 5.54E-164 | 0.451065704 | 0.699 | 0.229 | 1.03E-159 | 17 | HIVEP2   |
| 7.45E-164 | 0.422085129 | 0.747 | 0.267 | 1.39E-159 | 17 | CHPT1    |
| 4.45E-163 | 0.434945938 | 0.761 | 0.293 | 8.30E-159 | 17 | NAMPT    |
| 1.16E-162 | 0.434871844 | 0.823 | 0.321 | 2.17E-158 | 17 | PAK1     |
| 3.95E-162 | 0.294650281 | 0.686 | 0.244 | 7.36E-158 | 17 | ATXN1    |
| 5.32E-162 | 0.348508201 | 0.555 | 0.133 | 9.92E-158 | 17 | STK40    |
| 9.15E-162 | 0.732465856 | 0.989 | 0.722 | 1.71E-157 | 17 | SAT1     |
| 3.69E-161 | 0.471035361 | 0.845 | 0.37  | 6.87E-157 | 17 | VASP     |
| 6.06E-161 | 0.753446429 | 0.649 | 0.221 | 1.13E-156 | 17 | MX2      |
| 8.81E-161 | 0.419275603 | 0.945 | 0.523 | 1.64E-156 | 17 | LGALS1   |
| 1.03E-160 | 0.326279599 | 0.609 | 0.164 | 1.93E-156 | 17 | GPR132   |
| 4.89E-160 | 0.528774616 | 0.947 | 0.624 | 9.12E-156 | 17 | AKAP13   |
| 5.50E-160 | 0.393003582 | 0.397 | 0.034 | 1.02E-155 | 17 | CHAD     |
| 1.02E-159 | 0.426827083 | 0.75  | 0.28  | 1.91E-155 | 17 | NFATC2   |
| 1.86E-159 | 0.407825014 | 0.772 | 0.315 | 3.47E-155 | 17 | OSBPL8   |
| 5.62E-159 | 0.3995808   | 0.635 | 0.198 | 1.05E-154 | 17 | UBE2D1   |
| 6.51E-159 | 0.367485129 | 0.616 | 0.162 | 1.21E-154 | 17 | POR      |
| 1.05E-158 | 0.528450621 | 0.901 | 0.463 | 1.96E-154 | 17 | HNRNPUL1 |
| 1.22E-158 | 0.41500152  | 0.522 | 0.1   | 2.28E-154 | 17 | HIPK2    |
| 1.56E-158 | 0.463096285 | 0.653 | 0.199 | 2.90E-154 | 17 | KCTD20   |
| 9.81E-158 | 0.449807862 | 0.739 | 0.256 | 1.83E-153 | 17 | GARS     |
| 2.32E-157 | 0.469697597 | 0.865 | 0.376 | 4.32E-153 | 17 | TGIF1    |
| 2.35E-157 | 0.388789067 | 0.664 | 0.215 | 4.39E-153 | 17 | BCL3     |
| 1.46E-156 | 0.403476382 | 0.824 | 0.333 | 2.71E-152 | 17 | FYTTD1   |
| 1.57E-155 | 0.452334139 | 0.631 | 0.194 | 2.93E-151 | 17 | IRF4     |
| 1.60E-155 | 0.715264333 | 0.968 | 0.672 | 2.98E-151 | 17 | GSTP1    |
| 1.66E-155 | 0.337095353 | 0.409 | 0.055 | 3.09E-151 | 17 | TMEM120B |
| 2.61E-155 | 0.441235524 | 0.579 | 0.145 | 4.87E-151 | 17 | TES      |
| 2.77E-155 | 0.402079985 | 0.682 | 0.218 | 5.17E-151 | 17 | ZEB1     |
| 3.23E-155 | 0.432228464 | 0.676 | 0.212 | 6.02E-151 | 17 | LSR      |
| 1.90E-154 | 0.367055501 | 0.65  | 0.191 | 3.54E-150 | 17 | EDEM1    |

|           |             |       |       |           |    |          |
|-----------|-------------|-------|-------|-----------|----|----------|
| 2.85E-154 | 0.467134358 | 0.688 | 0.224 | 5.32E-150 | 17 | MRPS6    |
| 9.42E-154 | 0.427832542 | 0.789 | 0.295 | 1.76E-149 | 17 | APLP2    |
| 4.05E-153 | 0.400492036 | 0.837 | 0.367 | 7.55E-149 | 17 | TRAF4    |
| 8.01E-153 | 0.430200695 | 0.833 | 0.37  | 1.49E-148 | 17 | HIVEP1   |
| 1.73E-152 | 0.445149344 | 0.698 | 0.225 | 3.23E-148 | 17 | GSPT1    |
| 8.93E-152 | 0.483045664 | 0.889 | 0.433 | 1.66E-147 | 17 | ADGRE5   |
| 2.65E-150 | 0.371811551 | 0.573 | 0.135 | 4.93E-146 | 17 | C15orf39 |
| 5.94E-150 | 0.461828118 | 0.888 | 0.43  | 1.11E-145 | 17 | STAT6    |
| 1.04E-149 | 0.403419109 | 0.759 | 0.266 | 1.93E-145 | 17 | NRROS    |
| 3.42E-149 | 0.482995384 | 0.515 | 0.121 | 6.37E-145 | 17 | CST7     |
| 2.83E-147 | 0.495392081 | 0.51  | 0.126 | 5.28E-143 | 17 | INSIG2   |
| 3.33E-147 | 0.29219024  | 0.443 | 0.069 | 6.20E-143 | 17 | SELENOO  |
| 5.86E-147 | 0.329472135 | 0.582 | 0.159 | 1.09E-142 | 17 | ZZEF1    |
| 2.05E-146 | 0.336818948 | 0.711 | 0.253 | 3.83E-142 | 17 | PARP14   |
| 8.17E-146 | 0.366920537 | 0.558 | 0.143 | 1.52E-141 | 17 | HYOU1    |
| 2.69E-145 | 0.458662235 | 0.67  | 0.215 | 5.01E-141 | 17 | RALA     |
| 5.16E-145 | 0.328915882 | 0.362 | 0.027 | 9.61E-141 | 17 | ZMIZ1    |
| 6.83E-145 | 0.393712655 | 0.493 | 0.098 | 1.27E-140 | 17 | C12orf49 |
| 1.60E-144 | 0.340688416 | 0.798 | 0.319 | 2.98E-140 | 17 | VDAC1    |
| 5.14E-144 | 0.296230555 | 0.355 | 0.028 | 9.59E-140 | 17 | SMAD3    |
| 5.40E-144 | 0.334461364 | 0.44  | 0.072 | 1.01E-139 | 17 | KLHL21   |
| 8.35E-144 | 0.369290879 | 0.616 | 0.199 | 1.56E-139 | 17 | TRRAP    |
| 1.49E-143 | 0.306102618 | 0.509 | 0.132 | 2.78E-139 | 17 | SEMA4D   |
| 8.99E-143 | 0.408085058 | 0.849 | 0.411 | 1.68E-138 | 17 | DENND4A  |
| 3.06E-142 | 0.264869392 | 0.386 | 0.053 | 5.70E-138 | 17 | IQCIN    |
| 3.50E-142 | 0.434503408 | 0.776 | 0.32  | 6.53E-138 | 17 | PEA15    |
| 7.96E-142 | 0.35965229  | 0.516 | 0.11  | 1.48E-137 | 17 | ZC3H7B   |
| 1.37E-141 | 0.668230151 | 0.343 | 0.02  | 2.55E-137 | 17 | RRAD     |
| 3.29E-141 | 0.436327089 | 0.992 | 0.719 | 6.13E-137 | 17 | TMBIM6   |
| 4.86E-140 | 0.494573731 | 0.949 | 0.607 | 9.05E-136 | 17 | ORAI2    |
| 6.41E-140 | 0.353924442 | 0.778 | 0.324 | 1.19E-135 | 17 | SF3B4    |
| 9.84E-140 | 0.362938702 | 0.604 | 0.179 | 1.83E-135 | 17 | HERC2    |
| 1.30E-139 | 0.484494958 | 0.941 | 0.558 | 2.42E-135 | 17 | DDX21    |
| 5.05E-139 | 0.33552557  | 0.647 | 0.199 | 9.42E-135 | 17 | CCSER2   |
| 3.31E-138 | 0.464670776 | 0.722 | 0.276 | 6.17E-134 | 17 | WARS     |
| 4.30E-138 | 0.621959635 | 0.913 | 0.544 | 8.01E-134 | 17 | ERH      |
| 1.59E-137 | 0.306662787 | 0.313 | 0.015 | 2.97E-133 | 17 | FGFR1    |
| 1.60E-137 | 0.358927788 | 0.747 | 0.284 | 2.98E-133 | 17 | JPT1     |
| 1.28E-136 | 0.292688347 | 0.29  | 0.007 | 2.38E-132 | 17 | GNG4     |
| 1.29E-136 | 0.365193827 | 0.828 | 0.369 | 2.41E-132 | 17 | FBXO21   |
| 1.40E-136 | 0.316058849 | 0.499 | 0.116 | 2.62E-132 | 17 | HELZ2    |
| 1.89E-136 | 0.375810268 | 0.628 | 0.211 | 3.52E-132 | 17 | LAP3     |
| 1.03E-135 | 0.368682339 | 0.634 | 0.208 | 1.91E-131 | 17 | LYSMD2   |
| 1.26E-135 | 0.422507861 | 0.983 | 0.684 | 2.36E-131 | 17 | RAN      |
| 3.55E-135 | 0.37383544  | 0.83  | 0.397 | 6.63E-131 | 17 | ANKRD11  |
| 3.61E-134 | 0.281276605 | 0.404 | 0.062 | 6.73E-130 | 17 | TPCN2    |

|           |             |       |       |           |    |          |
|-----------|-------------|-------|-------|-----------|----|----------|
| 2.29E-133 | 0.311689831 | 0.433 | 0.087 | 4.27E-129 | 17 | BID      |
| 2.37E-133 | 0.320509257 | 0.523 | 0.133 | 4.42E-129 | 17 | WNT10A   |
| 2.97E-133 | 0.325162444 | 0.488 | 0.119 | 5.53E-129 | 17 | IFIH1    |
| 4.47E-133 | 0.375634731 | 0.606 | 0.182 | 8.33E-129 | 17 | BANP     |
| 7.32E-133 | 0.37790343  | 0.644 | 0.228 | 1.36E-128 | 17 | RNF145   |
| 2.49E-132 | 0.444453436 | 0.427 | 0.091 | 4.64E-128 | 17 | OAS2     |
| 2.63E-132 | 0.35841441  | 0.503 | 0.125 | 4.91E-128 | 17 | MYO1C    |
| 3.86E-132 | 0.306852083 | 0.682 | 0.257 | 7.20E-128 | 17 | GNB1     |
| 9.33E-132 | 0.266336929 | 0.455 | 0.106 | 1.74E-127 | 17 | CTDP1    |
| 1.03E-131 | 0.597445755 | 0.711 | 0.29  | 1.93E-127 | 17 | HMOX1    |
| 1.92E-131 | 0.359054113 | 0.944 | 0.521 | 3.59E-127 | 17 | RELB     |
| 2.04E-131 | 0.332717816 | 0.602 | 0.183 | 3.80E-127 | 17 | ZNF267   |
| 3.87E-131 | 0.334042563 | 0.558 | 0.154 | 7.22E-127 | 17 | CHST11   |
| 9.44E-131 | 0.460421102 | 0.466 | 0.099 | 1.76E-126 | 17 | MARCKS   |
| 1.09E-130 | 0.415702997 | 0.686 | 0.273 | 2.04E-126 | 17 | IRF7     |
| 1.25E-130 | 0.407613259 | 0.802 | 0.34  | 2.33E-126 | 17 | RANBP2   |
| 1.77E-130 | 0.343704639 | 0.793 | 0.353 | 3.30E-126 | 17 | SPTAN1   |
| 5.03E-130 | 0.553207555 | 0.667 | 0.233 | 9.38E-126 | 17 | CEMP2    |
| 2.19E-129 | 0.28226922  | 0.645 | 0.227 | 4.09E-125 | 17 | ZBTB43   |
| 3.55E-129 | 0.269000215 | 0.294 | 0.013 | 6.62E-125 | 17 | ANKRD33B |
| 4.01E-129 | 0.429162309 | 0.74  | 0.305 | 7.48E-125 | 17 | PIKFYVE  |
| 5.88E-129 | 0.46577557  | 0.965 | 0.641 | 1.10E-124 | 17 | CYTH1    |
| 7.24E-128 | 0.287060012 | 0.435 | 0.078 | 1.35E-123 | 17 | HIP1R    |
| 1.10E-126 | 0.571833695 | 0.843 | 0.457 | 2.05E-122 | 17 | APOBEC3G |
| 1.23E-126 | 0.282054767 | 0.451 | 0.103 | 2.29E-122 | 17 | N4BP3    |
| 1.48E-126 | 0.266471411 | 0.494 | 0.117 | 2.75E-122 | 17 | BAIAP3   |
| 1.13E-125 | 0.292455009 | 0.525 | 0.145 | 2.11E-121 | 17 | DUSP5    |
| 2.30E-125 | 0.258957564 | 0.351 | 0.048 | 4.29E-121 | 17 | JSRP1    |
| 3.21E-125 | 0.29607105  | 0.682 | 0.236 | 5.99E-121 | 17 | CDK17    |
| 5.96E-125 | 0.274919487 | 0.442 | 0.094 | 1.11E-120 | 17 | PRKAG2   |
| 6.29E-125 | 0.435793638 | 0.95  | 0.632 | 1.17E-120 | 17 | PDE4B    |
| 1.01E-124 | 0.419317439 | 0.761 | 0.336 | 1.88E-120 | 17 | PTP4A1   |
| 3.70E-124 | 0.412718915 | 0.943 | 0.566 | 6.90E-120 | 17 | FLNA     |
| 5.10E-124 | 0.276886945 | 0.515 | 0.137 | 9.51E-120 | 17 | CLCN3    |
| 1.14E-123 | 0.250570778 | 0.337 | 0.039 | 2.13E-119 | 17 | GPR137B  |
| 1.18E-123 | 0.328618546 | 0.87  | 0.433 | 2.21E-119 | 17 | SMG1     |
| 1.75E-123 | 0.272545535 | 0.524 | 0.136 | 3.27E-119 | 17 | RAB3IP   |
| 3.14E-123 | 0.276348178 | 0.344 | 0.053 | 5.85E-119 | 17 | ADAP2    |
| 4.54E-123 | 0.349419197 | 0.82  | 0.377 | 8.46E-119 | 17 | CYLD     |
| 8.51E-123 | 0.40064072  | 0.95  | 0.58  | 1.59E-118 | 17 | SEC61B   |
| 1.65E-122 | 0.359076432 | 0.937 | 0.58  | 3.07E-118 | 17 | PKM      |
| 3.42E-122 | 0.301546764 | 0.765 | 0.336 | 6.37E-118 | 17 | PSMB4    |
| 4.79E-122 | 0.254681206 | 0.485 | 0.125 | 8.94E-118 | 17 | PRDM4    |
| 8.95E-122 | 0.408140986 | 0.732 | 0.301 | 1.67E-117 | 17 | ATP1B3   |
| 3.00E-121 | 0.284180714 | 0.63  | 0.211 | 5.59E-117 | 17 | ANKRD13A |
| 5.08E-121 | 0.294698183 | 0.604 | 0.201 | 9.47E-117 | 17 | TUBB6    |

|           |             |       |       |           |    |                      |
|-----------|-------------|-------|-------|-----------|----|----------------------|
| 5.20E-121 | 0.262431476 | 0.666 | 0.249 | 9.70E-117 | 17 | WHRN                 |
| 8.05E-121 | 0.298660617 | 0.426 | 0.086 | 1.50E-116 | 17 | FOSL2                |
| 8.72E-121 | 0.376456435 | 0.418 | 0.078 | 1.63E-116 | 17 | GRAMD1A              |
| 9.99E-121 | 0.300211673 | 0.634 | 0.216 | 1.86E-116 | 17 | CLIC4                |
| 1.33E-120 | 0.277397922 | 0.396 | 0.055 | 2.48E-116 | 17 | SREBF1               |
| 1.84E-120 | 0.355440617 | 0.824 | 0.368 | 3.43E-116 | 17 | SEC14L1              |
| 2.02E-120 | 0.41243491  | 0.975 | 0.656 | 3.76E-116 | 17 | EIF5A                |
| 5.99E-120 | 0.402537996 | 0.625 | 0.208 | 1.12E-115 | 17 | CPEB4                |
| 7.07E-120 | 0.543998056 | 0.89  | 0.495 | 1.32E-115 | 17 | TNFRSF1B             |
| 1.34E-119 | 0.259519327 | 0.429 | 0.093 | 2.49E-115 | 17 | TIMP2                |
| 3.30E-119 | 0.274413744 | 0.489 | 0.117 | 6.16E-115 | 17 | GOT1                 |
| 5.08E-119 | 0.283136372 | 0.464 | 0.118 | 9.48E-115 | 17 | ORAI1                |
| 5.38E-119 | 0.674167823 | 0.959 | 0.767 | 1.00E-114 | 17 | ZFP36L1              |
| 3.45E-118 | 0.271447787 | 0.391 | 0.069 | 6.43E-114 | 17 | AMPD3                |
| 5.12E-118 | 0.408441446 | 0.892 | 0.493 | 9.55E-114 | 17 | TNIP1                |
| 2.26E-117 | 0.391237394 | 0.846 | 0.439 | 4.22E-113 | 17 | ADAR                 |
| 1.53E-116 | 0.385300795 | 0.564 | 0.177 | 2.85E-112 | 17 | TUBB2A               |
| 2.53E-116 | 0.489120079 | 0.479 | 0.13  | 4.72E-112 | 17 | AL133415.1           |
| 1.46E-115 | 0.369443841 | 0.502 | 0.152 | 2.72E-111 | 17 | RAB9A                |
| 3.04E-115 | 0.42460157  | 0.29  | 0.03  | 5.66E-111 | 17 | OASL                 |
| 5.94E-115 | 0.255564444 | 0.311 | 0.031 | 1.11E-110 | 17 | CYB561               |
| 6.74E-115 | 0.403568491 | 0.829 | 0.405 | 1.26E-110 | 17 | PLEKHA2              |
| 8.89E-115 | 0.25676254  | 0.458 | 0.119 | 1.66E-110 | 17 | ST8SIA4              |
| 9.88E-115 | 0.380637253 | 0.843 | 0.405 | 1.84E-110 | 17 | LDHA                 |
| 1.38E-114 | 0.363588162 | 1     | 0.883 | 2.57E-110 | 17 | COX4I1               |
| 2.46E-114 | 0.26021639  | 0.594 | 0.2   | 4.59E-110 | 17 | ORMDL2               |
| 4.40E-114 | 0.256260032 | 0.397 | 0.081 | 8.19E-110 | 17 | SLC1A4               |
| 8.64E-114 | 0.284943954 | 0.496 | 0.133 | 1.61E-109 | 17 | TXNRD1               |
| 4.26E-113 | 0.330791133 | 0.621 | 0.225 | 7.94E-109 | 17 | IRF5                 |
| 7.32E-113 | 0.338371008 | 0.369 | 0.076 | 1.36E-108 | 17 | CYTOR                |
| 2.34E-112 | 0.258452177 | 0.488 | 0.127 | 4.35E-108 | 17 | SRD5A1               |
| 2.71E-112 | 0.323303244 | 0.786 | 0.346 | 5.05E-108 | 17 | FMNL1                |
| 3.71E-112 | 0.275378338 | 0.725 | 0.3   | 6.92E-108 | 17 | MAP3K2               |
| 4.75E-112 | 0.278925072 | 0.607 | 0.211 | 8.85E-108 | 17 | CBFA2T3              |
| 6.98E-112 | 0.343555539 | 0.819 | 0.385 | 1.30E-107 | 17 | EIF2S2               |
| 2.68E-111 | 0.267463097 | 0.54  | 0.164 | 5.00E-107 | 17 | PRR7                 |
| 4.75E-111 | 0.347827268 | 0.844 | 0.421 | 8.85E-107 | 17 | CD63                 |
| 1.35E-110 | 0.261083522 | 0.633 | 0.227 | 2.52E-106 | 17 | SS18                 |
| 8.97E-110 | 0.29813661  | 0.837 | 0.387 | 1.67E-105 | 17 | TMED2                |
| 1.90E-109 | 0.278797806 | 0.816 | 0.41  | 3.55E-105 | 17 | POLR2A               |
| 2.25E-108 | 0.265104975 | 0.394 | 0.076 | 4.20E-104 | 17 | GRASP                |
| 3.97E-108 | 0.308911682 | 0.662 | 0.254 | 7.40E-104 | 17 | SOD2-ENSG00000112096 |
| 2.81E-107 | 0.490334839 | 0.852 | 0.478 | 5.23E-103 | 17 | TUBA4A               |
| 2.12E-106 | 0.2997134   | 0.805 | 0.383 | 3.95E-102 | 17 | RIPOR1               |
| 6.21E-106 | 0.387838409 | 0.943 | 0.597 | 1.16E-101 | 17 | CD99                 |
| 6.79E-106 | 0.262182115 | 0.724 | 0.316 | 1.27E-101 | 17 | ANXA7                |

|           |             |       |       |           |    |          |
|-----------|-------------|-------|-------|-----------|----|----------|
| 1.09E-105 | 0.413011716 | 0.933 | 0.579 | 2.04E-101 | 17 | MYH9     |
| 1.63E-105 | 0.310909239 | 0.774 | 0.353 | 3.03E-101 | 17 | SBNO1    |
| 4.52E-105 | 0.309438502 | 0.869 | 0.435 | 8.43E-101 | 17 | UBE2N    |
| 1.01E-104 | 0.255533359 | 0.487 | 0.132 | 1.88E-100 | 17 | ACSL1    |
| 3.36E-104 | 0.349331469 | 0.904 | 0.498 | 6.26E-100 | 17 | BIRC3    |
| 7.11E-104 | 0.258589492 | 0.622 | 0.219 | 1.33E-99  | 17 | ADSS     |
| 7.33E-104 | 0.270217203 | 0.683 | 0.266 | 1.37E-99  | 17 | SPAG9    |
| 1.30E-103 | 0.289924616 | 0.682 | 0.25  | 2.41E-99  | 17 | CS       |
| 3.45E-103 | 0.325910031 | 0.597 | 0.212 | 6.43E-99  | 17 | CTSB     |
| 6.10E-103 | 0.265723334 | 0.695 | 0.296 | 1.14E-98  | 17 | SEL1L3   |
| 8.23E-103 | 0.369283834 | 0.863 | 0.476 | 1.53E-98  | 17 | WIPF1    |
| 2.64E-102 | 0.284855052 | 0.54  | 0.165 | 4.93E-98  | 17 | STX11    |
| 2.97E-102 | 0.381229969 | 0.825 | 0.448 | 5.53E-98  | 17 | CD82     |
| 6.43E-102 | 0.256077755 | 0.529 | 0.173 | 1.20E-97  | 17 | NEK1     |
| 1.17E-101 | 0.283834644 | 0.353 | 0.074 | 2.18E-97  | 17 | CMSS1    |
| 2.36E-101 | 0.346551422 | 0.855 | 0.431 | 4.40E-97  | 17 | LAPTM4A  |
| 4.00E-101 | 0.260619256 | 0.567 | 0.2   | 7.46E-97  | 17 | PRKCD    |
| 6.86E-101 | 0.281528216 | 0.804 | 0.401 | 1.28E-96  | 17 | SPINT2   |
| 8.46E-101 | 0.283457319 | 0.501 | 0.16  | 1.58E-96  | 17 | PDCL3    |
| 2.63E-100 | 0.261781066 | 0.6   | 0.231 | 4.91E-96  | 17 | GLIPR1   |
| 9.48E-100 | 0.263275503 | 0.33  | 0.05  | 1.77E-95  | 17 | L1CAM    |
| 1.11E-99  | 0.446595559 | 0.856 | 0.511 | 2.07E-95  | 17 | IFNGR2   |
| 1.18E-99  | 0.250364822 | 0.746 | 0.321 | 2.21E-95  | 17 | UBE2A    |
| 1.21E-99  | 0.319417887 | 0.887 | 0.461 | 2.26E-95  | 17 | GNG5     |
| 2.70E-99  | 0.300746478 | 0.981 | 0.765 | 5.04E-95  | 17 | STK4     |
| 1.71E-98  | 0.254778147 | 0.283 | 0.032 | 3.18E-94  | 17 | TNFRSF9  |
| 9.65E-98  | 0.337237493 | 0.543 | 0.195 | 1.80E-93  | 17 | GUSB     |
| 2.61E-97  | 0.31647523  | 0.957 | 0.612 | 4.87E-93  | 17 | SRSF2    |
| 2.95E-97  | 0.309183725 | 0.785 | 0.353 | 5.50E-93  | 17 | ATP6V0D1 |
| 3.87E-97  | 0.250049563 | 0.629 | 0.25  | 7.21E-93  | 17 | DLGAP4   |
| 7.10E-97  | 0.256287626 | 0.422 | 0.097 | 1.32E-92  | 17 | MIR22HG  |
| 7.30E-97  | 0.298500423 | 0.719 | 0.312 | 1.36E-92  | 17 | CTNNB1   |
| 1.12E-96  | 0.260776895 | 0.465 | 0.135 | 2.08E-92  | 17 | PRDX2    |
| 1.66E-96  | 0.277208095 | 0.255 | 0.022 | 3.09E-92  | 17 | APOBEC3B |
| 3.93E-96  | 0.259260496 | 0.791 | 0.384 | 7.33E-92  | 17 | WBP11    |
| 4.36E-95  | 0.290594325 | 0.872 | 0.473 | 8.12E-91  | 17 | JUND     |
| 5.49E-95  | 0.343418628 | 0.696 | 0.323 | 1.02E-90  | 17 | RAB29    |
| 1.49E-94  | 0.290286919 | 0.834 | 0.432 | 2.79E-90  | 17 | R3HDM4   |
| 6.15E-94  | 0.307187019 | 0.787 | 0.391 | 1.15E-89  | 17 | TMEM123  |
| 1.20E-93  | 0.352745783 | 0.452 | 0.132 | 2.25E-89  | 17 | PEG10    |
| 1.69E-93  | 0.29969936  | 0.948 | 0.598 | 3.15E-89  | 17 | SPOCK2   |
| 3.50E-93  | 0.310494344 | 0.853 | 0.44  | 6.53E-89  | 17 | ZEB2     |
| 1.69E-91  | 0.277256863 | 0.265 | 0.028 | 3.15E-87  | 17 | HES4     |
| 3.03E-91  | 0.634746317 | 0.537 | 0.212 | 5.65E-87  | 17 | ISG15    |
| 4.04E-91  | 0.309835227 | 0.806 | 0.399 | 7.53E-87  | 17 | PBXIP1   |
| 7.23E-91  | 0.862288986 | 0.38  | 0.094 | 1.35E-86  | 17 | RMRP     |

|           |             |       |       |           |    |           |
|-----------|-------------|-------|-------|-----------|----|-----------|
| 1.67E-90  | 0.275887228 | 0.215 | 0.009 | 3.11E-86  | 17 | MAP1B     |
| 1.72E-90  | 0.279896918 | 0.786 | 0.406 | 3.21E-86  | 17 | ANXA5     |
| 6.61E-90  | 0.29348916  | 0.285 | 0.046 | 1.23E-85  | 17 | PLSCR1    |
| 9.17E-90  | 0.787439905 | 0.26  | 0.03  | 1.71E-85  | 17 | RGS12     |
| 3.19E-89  | 0.314696991 | 0.971 | 0.679 | 5.94E-85  | 17 | ATP6V0C   |
| 1.14E-88  | 0.276557351 | 0.831 | 0.422 | 2.13E-84  | 17 | STK17A    |
| 4.81E-88  | 0.253846111 | 0.342 | 0.062 | 8.96E-84  | 17 | PFKFB3    |
| 8.51E-87  | 0.270456476 | 0.796 | 0.39  | 1.59E-82  | 17 | TENT5C    |
| 1.04E-86  | 0.39187566  | 0.623 | 0.257 | 1.94E-82  | 17 | SESN3     |
| 1.37E-86  | 0.29351275  | 0.454 | 0.149 | 2.55E-82  | 17 | CXCR3     |
| 1.27E-85  | 0.264476633 | 0.867 | 0.483 | 2.37E-81  | 17 | GUK1      |
| 4.49E-81  | 0.254147356 | 0.537 | 0.2   | 8.38E-77  | 17 | HIST2H2AC |
| 1.89E-80  | 0.255229831 | 0.84  | 0.46  | 3.52E-76  | 17 | TPM4      |
| 1.17E-79  | 0.27033294  | 0.84  | 0.459 | 2.18E-75  | 17 | IL16      |
| 4.23E-77  | 0.51185571  | 0.87  | 0.574 | 7.88E-73  | 17 | ISG20     |
| 9.20E-77  | 0.33313446  | 0.658 | 0.293 | 1.71E-72  | 17 | TXN       |
| 2.71E-75  | 0.258196222 | 0.585 | 0.253 | 5.06E-71  | 17 | BACE2     |
| 9.08E-74  | 0.253348679 | 0.983 | 0.711 | 1.69E-69  | 17 | CALM2     |
| 2.50E-73  | 0.30345842  | 0.877 | 0.539 | 4.67E-69  | 17 | AGPAT5    |
| 9.88E-72  | 0.351939926 | 0.471 | 0.192 | 1.84E-67  | 17 | DDIT4     |
| 1.50E-71  | 0.252144119 | 0.976 | 0.737 | 2.79E-67  | 17 | PRRC2C    |
| 1.45E-66  | 0.649693724 | 0.351 | 0.113 | 2.71E-62  | 17 | MT2A      |
| 1.50E-66  | 0.385880813 | 0.762 | 0.423 | 2.80E-62  | 17 | LY9       |
| 2.04E-65  | 0.384782488 | 0.296 | 0.081 | 3.81E-61  | 17 | GK        |
| 1.49E-63  | 0.282255744 | 0.935 | 0.637 | 2.77E-59  | 17 | CDC37     |
| 1.04E-62  | 0.322658933 | 0.346 | 0.095 | 1.94E-58  | 17 | LGALS3    |
| 3.72E-59  | 0.257419216 | 0.939 | 0.651 | 6.93E-55  | 17 | TUBA1A    |
| 3.05E-55  | 0.252158983 | 0.757 | 0.436 | 5.68E-51  | 17 | SERPINB1  |
| 1.74E-52  | 0.372665442 | 0.568 | 0.27  | 3.24E-48  | 17 | MGAT1     |
| 3.30E-52  | 0.28206437  | 0.874 | 0.531 | 6.15E-48  | 17 | GABARAPL2 |
| 3.47E-49  | 0.443562492 | 0.193 | 0.044 | 6.47E-45  | 17 | IFIT2     |
| 4.08E-46  | 0.337983934 | 0.824 | 0.497 | 7.61E-42  | 17 | PLCG2     |
| 4.92E-307 | 1.696595727 | 0.843 | 0.308 | 9.17E-303 | 18 | LINC01480 |
| 1.54E-265 | 1.141539163 | 0.961 | 0.722 | 2.87E-261 | 18 | MIF       |
| 3.53E-265 | 1.033420803 | 0.998 | 0.873 | 6.58E-261 | 18 | HSP90AB1  |
| 1.64E-240 | 1.200159257 | 0.878 | 0.5   | 3.06E-236 | 18 | ENO1      |
| 3.29E-230 | 0.824402107 | 0.727 | 0.226 | 6.14E-226 | 18 | DNPH1     |
| 6.17E-225 | 0.907440459 | 0.844 | 0.416 | 1.15E-220 | 18 | NME2      |
| 3.15E-220 | 0.872771557 | 0.784 | 0.319 | 5.87E-216 | 18 | NHP2      |
| 3.49E-219 | 0.943100161 | 0.818 | 0.385 | 6.51E-215 | 18 | PSME2     |
| 2.66E-217 | 0.843830629 | 0.981 | 0.833 | 4.96E-213 | 18 | PFN1      |
| 6.34E-202 | 0.887482984 | 0.864 | 0.498 | 1.18E-197 | 18 | SELENOH   |
| 3.00E-196 | 0.860250846 | 0.968 | 0.795 | 5.59E-192 | 18 | YBX1      |
| 6.97E-190 | 0.792864926 | 0.756 | 0.328 | 1.30E-185 | 18 | ATP5MC1   |
| 7.24E-188 | 0.84546306  | 0.983 | 0.855 | 1.35E-183 | 18 | NPM1      |
| 9.12E-179 | 0.800645382 | 0.706 | 0.274 | 1.70E-174 | 18 | C1QBP     |

|           |             |       |       |           |    |          |
|-----------|-------------|-------|-------|-----------|----|----------|
| 5.76E-178 | 0.846887139 | 0.928 | 0.687 | 1.07E-173 | 18 | RAN      |
| 2.29E-176 | 0.86531856  | 0.919 | 0.659 | 4.28E-172 | 18 | EIF5A    |
| 4.52E-170 | 0.84317174  | 0.876 | 0.527 | 8.43E-166 | 18 | RPL22L1  |
| 9.57E-164 | 0.801463089 | 0.789 | 0.439 | 1.78E-159 | 18 | LDHB     |
| 4.44E-163 | 0.652121531 | 0.714 | 0.311 | 8.28E-159 | 18 | SNRPE    |
| 1.06E-162 | 0.803824314 | 0.869 | 0.56  | 1.97E-158 | 18 | TPI1     |
| 3.86E-161 | 0.752006283 | 0.646 | 0.24  | 7.19E-157 | 18 | IMPDH2   |
| 1.51E-156 | 0.753694062 | 0.829 | 0.518 | 2.82E-152 | 18 | ATP5MC3  |
| 1.09E-148 | 0.762174155 | 0.922 | 0.628 | 2.04E-144 | 18 | DBI      |
| 4.05E-146 | 0.738960415 | 0.81  | 0.431 | 7.56E-142 | 18 | ATOX1    |
| 5.40E-145 | 0.652496225 | 0.804 | 0.439 | 1.01E-140 | 18 | APRT     |
| 2.37E-144 | 1.07862939  | 0.724 | 0.335 | 4.42E-140 | 18 | MIR155HG |
| 3.90E-144 | 1.034717602 | 0.801 | 0.471 | 7.27E-140 | 18 | TUBB     |
| 2.92E-141 | 0.661141988 | 0.656 | 0.29  | 5.45E-137 | 18 | RANBP1   |
| 3.50E-138 | 0.638295165 | 0.74  | 0.338 | 6.53E-134 | 18 | BANF1    |
| 1.03E-137 | 0.62747273  | 0.817 | 0.498 | 1.91E-133 | 18 | COX5A    |
| 1.08E-135 | 0.649953529 | 0.739 | 0.374 | 2.02E-131 | 18 | PRMT1    |
| 3.53E-134 | 0.647631871 | 0.609 | 0.227 | 6.58E-130 | 18 | ABRACL   |
| 3.73E-133 | 0.602553828 | 0.905 | 0.604 | 6.96E-129 | 18 | GPX4     |
| 6.77E-128 | 0.572046804 | 0.685 | 0.328 | 1.26E-123 | 18 | PSMB6    |
| 1.11E-127 | 0.618065978 | 0.891 | 0.639 | 2.07E-123 | 18 | COX6C    |
| 3.28E-125 | 0.582119804 | 0.798 | 0.464 | 6.11E-121 | 18 | ATP5MF   |
| 1.90E-122 | 0.461209829 | 0.405 | 0.083 | 3.54E-118 | 18 | PAICS    |
| 3.07E-118 | 0.563052402 | 0.859 | 0.561 | 5.73E-114 | 18 | ANP32B   |
| 1.00E-116 | 0.642918778 | 0.857 | 0.591 | 1.87E-112 | 18 | COX6A1   |
| 2.06E-116 | 0.535219444 | 0.578 | 0.22  | 3.85E-112 | 18 | PHB      |
| 1.39E-114 | 0.401050432 | 0.42  | 0.101 | 2.59E-110 | 18 | MRPL24   |
| 1.41E-114 | 0.480946362 | 0.986 | 0.874 | 2.64E-110 | 18 | CFL1     |
| 1.46E-114 | 0.69957312  | 0.646 | 0.297 | 2.72E-110 | 18 | TXN      |
| 2.60E-112 | 0.585228863 | 0.759 | 0.429 | 4.85E-108 | 18 | ATP5PF   |
| 4.85E-111 | 0.498497243 | 0.961 | 0.798 | 9.05E-107 | 18 | ATP5MC2  |
| 1.37E-110 | 0.476301585 | 0.978 | 0.872 | 2.55E-106 | 18 | RPL26    |
| 1.93E-110 | 0.487901393 | 0.955 | 0.746 | 3.60E-106 | 18 | TMA7     |
| 2.84E-110 | 0.51864882  | 0.669 | 0.335 | 5.29E-106 | 18 | MRPL52   |
| 1.81E-108 | 0.527644123 | 0.685 | 0.359 | 3.38E-104 | 18 | CCT7     |
| 4.68E-107 | 0.513533341 | 0.773 | 0.453 | 8.72E-103 | 18 | NDUFB2   |
| 1.12E-104 | 0.713590696 | 0.843 | 0.585 | 2.08E-100 | 18 | PKM      |
| 1.59E-103 | 0.569695046 | 0.861 | 0.57  | 2.96E-99  | 18 | SET      |
| 3.26E-102 | 0.601212528 | 0.725 | 0.418 | 6.08E-98  | 18 | UQCRCQ   |
| 2.28E-101 | 0.502584852 | 0.961 | 0.786 | 4.25E-97  | 18 | PEBP1    |
| 5.23E-101 | 0.499911613 | 0.838 | 0.561 | 9.74E-97  | 18 | ELOB     |
| 4.33E-100 | 0.406342652 | 0.558 | 0.24  | 8.07E-96  | 18 | MRPL4    |
| 6.36E-100 | 0.481457933 | 0.742 | 0.441 | 1.19E-95  | 18 | ATP5MPL  |
| 1.77E-98  | 0.508880012 | 0.521 | 0.206 | 3.30E-94  | 18 | PPA1     |
| 3.72E-98  | 0.425671556 | 0.956 | 0.783 | 6.93E-94  | 18 | HSPA8    |
| 7.25E-98  | 0.47930288  | 0.502 | 0.17  | 1.35E-93  | 18 | TIMM13   |



|          |             |       |       |          |    |            |
|----------|-------------|-------|-------|----------|----|------------|
| 1.29E-96 | 0.418988729 | 0.539 | 0.211 | 2.40E-92 | 18 | NDUFAF8    |
| 1.44E-96 | 0.608006127 | 0.82  | 0.486 | 2.69E-92 | 18 | IGLL5      |
| 2.51E-96 | 0.416529875 | 0.667 | 0.352 | 4.68E-92 | 18 | SNRPC      |
| 3.60E-96 | 0.496910701 | 0.756 | 0.449 | 6.71E-92 | 18 | PSMB3      |
| 5.43E-96 | 0.377560853 | 0.431 | 0.134 | 1.01E-91 | 18 | TRMT1      |
| 2.44E-94 | 0.443253453 | 0.492 | 0.16  | 4.55E-90 | 18 | PHPT1      |
| 1.67E-92 | 0.446528594 | 0.668 | 0.341 | 3.12E-88 | 18 | C19orf70   |
| 4.62E-92 | 0.285690625 | 0.249 | 0.022 | 8.62E-88 | 18 | NME1       |
| 1.92E-90 | 0.328560859 | 0.349 | 0.086 | 3.58E-86 | 18 | MCRIP2     |
| 1.97E-90 | 0.523625995 | 0.634 | 0.326 | 3.67E-86 | 18 | VDAC1      |
| 5.90E-90 | 0.430565383 | 0.974 | 0.853 | 1.10E-85 | 18 | BTF3       |
| 6.09E-90 | 0.444485536 | 0.663 | 0.338 | 1.13E-85 | 18 | NDUFB7     |
| 2.93E-89 | 0.49368355  | 0.319 | 0.064 | 5.47E-85 | 18 | L1TD1      |
| 3.05E-89 | 0.541014847 | 0.867 | 0.634 | 5.68E-85 | 18 | SOD1       |
| 9.88E-89 | 0.50027924  | 0.708 | 0.408 | 1.84E-84 | 18 | SNRPF      |
| 2.21E-88 | 0.479123887 | 0.935 | 0.777 | 4.12E-84 | 18 | CHCHD2     |
| 6.85E-88 | 0.402315884 | 0.648 | 0.342 | 1.28E-83 | 18 | GADD45GIP1 |
| 2.25E-87 | 0.357997626 | 0.51  | 0.201 | 4.19E-83 | 18 | PFDN6      |
| 7.10E-87 | 0.437164343 | 0.472 | 0.17  | 1.32E-82 | 18 | CDK4       |
| 8.89E-87 | 0.411819051 | 0.579 | 0.253 | 1.66E-82 | 18 | NUTF2      |
| 1.09E-86 | 0.45393733  | 0.752 | 0.446 | 2.03E-82 | 18 | FBL        |
| 4.13E-86 | 0.488221351 | 0.706 | 0.405 | 7.70E-82 | 18 | CCT3       |
| 4.14E-86 | 0.463421165 | 0.605 | 0.3   | 7.73E-82 | 18 | NDUFS6     |
| 6.37E-86 | 0.427853437 | 0.732 | 0.455 | 1.19E-81 | 18 | TUFM       |
| 9.80E-86 | 0.497675046 | 0.724 | 0.444 | 1.83E-81 | 18 | COX7B      |
| 1.24E-85 | 0.605832794 | 0.677 | 0.391 | 2.32E-81 | 18 | SEC61G     |
| 2.99E-85 | 0.418118997 | 0.705 | 0.398 | 5.58E-81 | 18 | MDH2       |
| 6.05E-85 | 0.428374492 | 0.587 | 0.283 | 1.13E-80 | 18 | NDUFAB1    |
| 6.73E-85 | 0.691855802 | 0.878 | 0.669 | 1.25E-80 | 18 | CALR       |
| 1.04E-84 | 0.547694898 | 0.975 | 0.853 | 1.93E-80 | 18 | ACTG1      |
| 1.18E-84 | 0.396869516 | 0.468 | 0.167 | 2.20E-80 | 18 | EBNA1BP2   |
| 1.35E-84 | 0.475606244 | 0.597 | 0.28  | 2.52E-80 | 18 | PDCD5      |
| 1.35E-84 | 0.499368215 | 0.848 | 0.614 | 2.52E-80 | 18 | NDUFA4     |
| 2.12E-84 | 0.681097972 | 0.774 | 0.501 | 3.94E-80 | 18 | MS4A1      |
| 2.98E-84 | 0.369269041 | 0.437 | 0.165 | 5.55E-80 | 18 | DCTPP1     |
| 5.60E-84 | 0.393841573 | 0.986 | 0.881 | 1.04E-79 | 18 | ATP5F1E    |
| 8.12E-84 | 0.384691687 | 0.764 | 0.491 | 1.51E-79 | 18 | UQCR10     |
| 1.20E-83 | 0.339745919 | 0.348 | 0.087 | 2.25E-79 | 18 | ISOC2      |
| 7.86E-83 | 0.490184896 | 0.419 | 0.142 | 1.46E-78 | 18 | FABP5      |
| 1.09E-82 | 0.463207653 | 0.823 | 0.543 | 2.04E-78 | 18 | PARK7      |
| 1.20E-82 | 0.395175963 | 0.703 | 0.419 | 2.24E-78 | 18 | PSMB10     |
| 1.04E-81 | 0.417682072 | 0.51  | 0.193 | 1.94E-77 | 18 | ATIC       |
| 1.18E-81 | 0.447293208 | 0.749 | 0.461 | 2.21E-77 | 18 | ROMO1      |
| 1.38E-81 | 0.41245185  | 0.827 | 0.579 | 2.57E-77 | 18 | NDUFA1     |
| 2.81E-81 | 0.492967722 | 0.89  | 0.681 | 5.24E-77 | 18 | RBM3       |
| 2.89E-81 | 0.463753225 | 0.683 | 0.381 | 5.39E-77 | 18 | PRDX6      |

|          |             |       |       |          |    |            |
|----------|-------------|-------|-------|----------|----|------------|
| 3.25E-81 | 0.466654341 | 0.665 | 0.369 | 6.06E-77 | 18 | PA2G4      |
| 4.76E-81 | 0.338369659 | 0.502 | 0.21  | 8.88E-77 | 18 | CCDC124    |
| 6.13E-81 | 0.431657136 | 0.792 | 0.539 | 1.14E-76 | 18 | TRMT112    |
| 4.49E-80 | 0.2616126   | 0.296 | 0.068 | 8.37E-76 | 18 | EXOSC5     |
| 6.50E-80 | 0.39025683  | 0.488 | 0.19  | 1.21E-75 | 18 | AHCY       |
| 1.20E-79 | 0.460405653 | 0.719 | 0.429 | 2.24E-75 | 18 | ATP5ME     |
| 1.49E-79 | 0.524567223 | 0.839 | 0.579 | 2.77E-75 | 18 | PRDX1      |
| 2.47E-79 | 0.449668474 | 0.763 | 0.492 | 4.60E-75 | 18 | PRELID1    |
| 2.58E-79 | 0.395328684 | 0.525 | 0.234 | 4.82E-75 | 18 | NDUFB3     |
| 6.01E-79 | 0.457937955 | 0.768 | 0.51  | 1.12E-74 | 18 | COX8A      |
| 1.06E-78 | 0.485877405 | 0.781 | 0.521 | 1.98E-74 | 18 | ATP5IF1    |
| 2.99E-78 | 0.447972228 | 0.814 | 0.554 | 5.58E-74 | 18 | ATP5F1D    |
| 3.73E-78 | 0.427131319 | 0.68  | 0.375 | 6.96E-74 | 18 | APEX1      |
| 9.54E-78 | 0.368101403 | 0.561 | 0.246 | 1.78E-73 | 18 | MRPS34     |
| 1.94E-77 | 0.560674511 | 0.546 | 0.255 | 3.62E-73 | 18 | ARHGAP44   |
| 3.43E-77 | 0.475889612 | 0.644 | 0.349 | 6.40E-73 | 18 | HSPB1      |
| 8.13E-77 | 0.421314672 | 0.78  | 0.488 | 1.51E-72 | 18 | LSM7       |
| 8.89E-77 | 0.402220033 | 0.596 | 0.28  | 1.66E-72 | 18 | CYC1       |
| 1.45E-76 | 0.438612686 | 0.765 | 0.499 | 2.69E-72 | 18 | POLR2L     |
| 4.67E-75 | 0.325157812 | 0.949 | 0.818 | 8.71E-71 | 18 | SRP14      |
| 6.87E-75 | 0.405502247 | 0.735 | 0.455 | 1.28E-70 | 18 | DAD1       |
| 9.04E-75 | 0.34063486  | 0.765 | 0.486 | 1.68E-70 | 18 | WDR83OS    |
| 5.39E-73 | 0.297966483 | 0.352 | 0.101 | 1.00E-68 | 18 | RUVBL2     |
| 9.66E-73 | 0.36718421  | 0.791 | 0.537 | 1.80E-68 | 18 | PHB2       |
| 1.67E-72 | 0.450905462 | 0.516 | 0.224 | 3.10E-68 | 18 | FMOD       |
| 4.99E-72 | 0.342747017 | 0.467 | 0.175 | 9.31E-68 | 18 | FAM173A    |
| 5.82E-72 | 0.563882166 | 0.616 | 0.332 | 1.09E-67 | 18 | PDIA6      |
| 1.13E-71 | 0.389855845 | 0.664 | 0.363 | 2.11E-67 | 18 | NDUFA2     |
| 2.78E-71 | 0.344447502 | 0.689 | 0.442 | 5.18E-67 | 18 | PSMD8      |
| 6.07E-71 | 0.548158822 | 0.341 | 0.105 | 1.13E-66 | 18 | SDF2L1     |
| 2.21E-70 | 0.392220987 | 0.713 | 0.424 | 4.12E-66 | 18 | BRK1       |
| 2.44E-70 | 0.43898915  | 0.845 | 0.617 | 4.56E-66 | 18 | COX6B1     |
| 3.21E-70 | 0.373914846 | 0.508 | 0.211 | 5.99E-66 | 18 | TMEM147    |
| 3.99E-70 | 0.456891505 | 0.828 | 0.598 | 7.44E-66 | 18 | COX5B      |
| 6.46E-69 | 0.424182398 | 0.788 | 0.549 | 1.20E-64 | 18 | PSMB1      |
| 9.02E-69 | 0.275649324 | 0.315 | 0.086 | 1.68E-64 | 18 | BOLA3      |
| 9.41E-69 | 0.348333251 | 0.653 | 0.387 | 1.75E-64 | 18 | NDUFA3     |
| 1.21E-68 | 0.315337756 | 0.486 | 0.205 | 2.25E-64 | 18 | MRPL11     |
| 1.30E-68 | 0.361713491 | 0.695 | 0.414 | 2.42E-64 | 18 | SSBP1      |
| 1.47E-68 | 0.622735611 | 0.524 | 0.255 | 2.74E-64 | 18 | MYDGF      |
| 1.78E-68 | 0.376844339 | 0.553 | 0.25  | 3.32E-64 | 18 | AC243960.1 |
| 1.89E-68 | 0.391372553 | 0.506 | 0.229 | 3.52E-64 | 18 | PKIG       |
| 2.81E-68 | 0.36077456  | 0.619 | 0.31  | 5.23E-64 | 18 | AKR1A1     |
| 8.59E-68 | 0.422599846 | 0.777 | 0.507 | 1.60E-63 | 18 | UQCR11     |
| 1.69E-67 | 0.312137516 | 0.363 | 0.108 | 3.15E-63 | 18 | TRAP1      |
| 3.75E-67 | 0.288588664 | 0.336 | 0.106 | 6.98E-63 | 18 | MRTO4      |

|          |             |       |       |          |    |         |
|----------|-------------|-------|-------|----------|----|---------|
| 5.51E-67 | 0.397363643 | 0.752 | 0.502 | 1.03E-62 | 18 | SNRPB   |
| 1.01E-66 | 0.450839965 | 0.834 | 0.538 | 1.89E-62 | 18 | PTPN6   |
| 2.10E-66 | 0.533946907 | 0.562 | 0.273 | 3.91E-62 | 18 | PIGR    |
| 2.67E-66 | 0.393255217 | 0.932 | 0.765 | 4.98E-62 | 18 | Sep-07  |
| 3.69E-66 | 0.29976155  | 0.357 | 0.128 | 6.88E-62 | 18 | TESPA1  |
| 1.35E-65 | 0.352802799 | 0.562 | 0.275 | 2.52E-61 | 18 | SRI     |
| 2.53E-65 | 0.358178064 | 0.762 | 0.5   | 4.72E-61 | 18 | ARL6IP4 |
| 2.70E-65 | 0.336921518 | 0.78  | 0.549 | 5.03E-61 | 18 | ERH     |
| 5.16E-65 | 0.43968612  | 0.807 | 0.543 | 9.61E-61 | 18 | LRMP    |
| 5.57E-65 | 0.298451237 | 0.525 | 0.245 | 1.04E-60 | 18 | NDUFS8  |
| 6.23E-65 | 0.336466142 | 0.595 | 0.321 | 1.16E-60 | 18 | PSMA6   |
| 2.59E-64 | 0.350429018 | 0.728 | 0.458 | 4.83E-60 | 18 | EIF3I   |
| 7.64E-64 | 0.360838456 | 0.609 | 0.331 | 1.42E-59 | 18 | SNRPD1  |
| 8.83E-64 | 0.344545147 | 0.402 | 0.138 | 1.65E-59 | 18 | PARVB   |
| 9.41E-64 | 0.460008439 | 0.847 | 0.621 | 1.75E-59 | 18 | SLC25A5 |
| 1.08E-63 | 0.304153345 | 0.635 | 0.367 | 2.01E-59 | 18 | C8orf59 |
| 1.41E-63 | 0.377012747 | 0.441 | 0.182 | 2.63E-59 | 18 | LCK     |
| 1.49E-63 | 0.363965417 | 0.597 | 0.31  | 2.78E-59 | 18 | RPS17   |
| 1.80E-63 | 0.353670029 | 0.716 | 0.456 | 3.35E-59 | 18 | BSG     |
| 2.19E-63 | 0.366159146 | 0.703 | 0.436 | 4.08E-59 | 18 | NDUFB9  |
| 2.30E-63 | 0.351339616 | 0.651 | 0.372 | 4.28E-59 | 18 | POLR2E  |
| 4.02E-63 | 0.340243117 | 0.676 | 0.386 | 7.50E-59 | 18 | FIS1    |
| 5.32E-63 | 0.308631093 | 0.472 | 0.199 | 9.92E-59 | 18 | NAA38   |
| 8.31E-63 | 0.388759093 | 0.776 | 0.54  | 1.55E-58 | 18 | ATP5F1A |
| 8.73E-63 | 0.396241694 | 0.681 | 0.404 | 1.63E-58 | 18 | RGS10   |
| 1.78E-62 | 0.441034561 | 0.808 | 0.585 | 3.32E-58 | 18 | SERBP1  |
| 2.38E-62 | 0.390407231 | 0.282 | 0.069 | 4.44E-58 | 18 | SUSD1   |
| 2.45E-62 | 0.338622573 | 0.71  | 0.436 | 4.57E-58 | 18 | PARP1   |
| 3.07E-62 | 0.302678249 | 0.558 | 0.277 | 5.73E-58 | 18 | PDAP1   |
| 4.46E-62 | 0.354125258 | 0.305 | 0.08  | 8.31E-58 | 18 | SRM     |
| 4.52E-62 | 0.293579119 | 0.707 | 0.44  | 8.42E-58 | 18 | CBX3    |
| 7.00E-62 | 0.309036511 | 0.378 | 0.141 | 1.30E-57 | 18 | TOMM40  |
| 1.34E-61 | 0.301433167 | 0.311 | 0.098 | 2.49E-57 | 18 | IFRD2   |
| 1.39E-61 | 0.288341942 | 0.548 | 0.287 | 2.59E-57 | 18 | LSM3    |
| 1.61E-61 | 0.522463223 | 0.291 | 0.09  | 3.00E-57 | 18 | FKBP11  |
| 3.26E-61 | 0.295318117 | 0.302 | 0.091 | 6.07E-57 | 18 | GPATCH4 |
| 5.67E-61 | 0.397202005 | 0.546 | 0.276 | 1.06E-56 | 18 | SLIRP   |
| 7.17E-61 | 0.292029558 | 0.557 | 0.303 | 1.34E-56 | 18 | BAX     |
| 7.29E-61 | 0.322104922 | 0.286 | 0.078 | 1.36E-56 | 18 | PDGFD   |
| 1.67E-60 | 0.309413558 | 0.552 | 0.273 | 3.12E-56 | 18 | UQCRC1  |
| 3.41E-60 | 0.356883355 | 0.968 | 0.838 | 6.35E-56 | 18 | SLC25A6 |
| 3.69E-60 | 0.306039784 | 0.445 | 0.192 | 6.87E-56 | 18 | MRPL3   |
| 9.19E-60 | 0.266087912 | 0.316 | 0.091 | 1.71E-55 | 18 | VARS    |
| 1.06E-59 | 0.265562085 | 0.377 | 0.143 | 1.98E-55 | 18 | ADSL    |
| 2.73E-59 | 0.7383054   | 0.964 | 0.848 | 5.09E-55 | 18 | GAPDH   |
| 2.99E-59 | 0.283193459 | 0.422 | 0.168 | 5.58E-55 | 18 | POLD2   |

|          |             |       |       |          |    |          |
|----------|-------------|-------|-------|----------|----|----------|
| 6.07E-59 | 0.343363291 | 0.849 | 0.626 | 1.13E-54 | 18 | UBL5     |
| 6.94E-59 | 0.364392416 | 0.665 | 0.37  | 1.29E-54 | 18 | ATP5PD   |
| 9.33E-59 | 0.346341175 | 0.716 | 0.464 | 1.74E-54 | 18 | COPE     |
| 1.36E-58 | 0.303871545 | 0.975 | 0.853 | 2.54E-54 | 18 | RPL23    |
| 1.53E-58 | 0.40118945  | 0.795 | 0.554 | 2.85E-54 | 18 | PSMA7    |
| 1.77E-58 | 0.397555945 | 0.499 | 0.239 | 3.30E-54 | 18 | FKBP2    |
| 2.26E-58 | 0.280179705 | 0.482 | 0.217 | 4.21E-54 | 18 | ITPA     |
| 2.60E-58 | 0.321725633 | 0.464 | 0.2   | 4.86E-54 | 18 | MRPS12   |
| 2.74E-58 | 0.381988041 | 0.73  | 0.476 | 5.12E-54 | 18 | PGAM1    |
| 2.98E-58 | 0.278990813 | 0.493 | 0.233 | 5.55E-54 | 18 | ERCC1    |
| 3.24E-58 | 0.306414149 | 0.645 | 0.373 | 6.04E-54 | 18 | NDUFB10  |
| 3.39E-58 | 0.427942085 | 0.758 | 0.513 | 6.31E-54 | 18 | CHCHD10  |
| 4.71E-58 | 0.292047362 | 0.399 | 0.154 | 8.79E-54 | 18 | PRDX3    |
| 5.52E-58 | 0.258156796 | 0.345 | 0.126 | 1.03E-53 | 18 | WDR46    |
| 5.88E-58 | 0.47494182  | 0.757 | 0.502 | 1.10E-53 | 18 | SPCS1    |
| 7.00E-58 | 0.388881116 | 0.922 | 0.76  | 1.31E-53 | 18 | ATP5MG   |
| 8.71E-58 | 0.33958158  | 0.655 | 0.397 | 1.62E-53 | 18 | PRDX5    |
| 2.65E-57 | 0.339809161 | 0.634 | 0.396 | 4.95E-53 | 18 | CANX     |
| 3.19E-57 | 0.324232223 | 0.562 | 0.291 | 5.95E-53 | 18 | REX1BD   |
| 3.33E-57 | 0.339622455 | 0.597 | 0.334 | 6.21E-53 | 18 | FKBP1A   |
| 7.70E-57 | 0.325648019 | 0.578 | 0.32  | 1.44E-52 | 18 | ANAPC11  |
| 1.23E-56 | 0.43749276  | 0.7   | 0.461 | 2.29E-52 | 18 | TMEM258  |
| 2.16E-56 | 0.88163916  | 0.258 | 0.065 | 4.03E-52 | 18 | APOD     |
| 2.40E-56 | 0.260533715 | 0.505 | 0.237 | 4.48E-52 | 18 | TMEM256  |
| 3.01E-56 | 0.353226918 | 0.463 | 0.198 | 5.61E-52 | 18 | C19orf24 |
| 4.01E-56 | 0.323593749 | 0.63  | 0.38  | 7.47E-52 | 18 | CCT6A    |
| 4.47E-56 | 0.315699035 | 0.608 | 0.367 | 8.33E-52 | 18 | CCT8     |
| 4.69E-56 | 0.284159408 | 0.505 | 0.256 | 8.74E-52 | 18 | PSMA5    |
| 7.15E-56 | 0.295927562 | 0.506 | 0.236 | 1.33E-51 | 18 | HSD17B10 |
| 8.04E-56 | 0.319502715 | 0.382 | 0.148 | 1.50E-51 | 18 | RCC1     |
| 8.35E-56 | 0.293595768 | 0.781 | 0.54  | 1.56E-51 | 18 | NDUFB11  |
| 9.29E-56 | 0.343248792 | 0.486 | 0.238 | 1.73E-51 | 18 | TKT      |
| 3.07E-55 | 0.283961126 | 0.651 | 0.389 | 5.73E-51 | 18 | SNRPD3   |
| 3.35E-55 | 0.279218015 | 0.641 | 0.363 | 6.24E-51 | 18 | TRAPPC1  |
| 4.21E-55 | 0.390262284 | 0.703 | 0.438 | 7.85E-51 | 18 | LY6E     |
| 6.48E-55 | 0.336231759 | 0.938 | 0.778 | 1.21E-50 | 18 | HNRNPDL  |
| 1.70E-54 | 0.370131297 | 0.863 | 0.666 | 3.17E-50 | 18 | PSME1    |
| 2.09E-54 | 0.339156795 | 0.619 | 0.369 | 3.89E-50 | 18 | TOMM5    |
| 2.39E-54 | 0.255299463 | 0.581 | 0.332 | 4.45E-50 | 18 | PSMC5    |
| 3.68E-54 | 0.368196864 | 0.541 | 0.283 | 6.85E-50 | 18 | CCT5     |
| 4.13E-54 | 0.260025854 | 0.521 | 0.276 | 7.70E-50 | 18 | MRPL57   |
| 7.31E-54 | 0.254378807 | 0.309 | 0.099 | 1.36E-49 | 18 | UQCC2    |
| 8.39E-54 | 0.388802964 | 0.18  | 0.036 | 1.56E-49 | 18 | TNFRSF17 |
| 8.39E-54 | 0.497396941 | 0.541 | 0.282 | 1.56E-49 | 18 | WARS     |
| 1.67E-53 | 0.256151368 | 0.533 | 0.273 | 3.11E-49 | 18 | NDUFS7   |
| 2.52E-53 | 0.418637982 | 0.657 | 0.411 | 4.69E-49 | 18 | LDHA     |

|          |             |       |       |          |    |          |
|----------|-------------|-------|-------|----------|----|----------|
| 4.17E-53 | 0.284494509 | 0.594 | 0.325 | 7.78E-49 | 18 | NEDD8    |
| 8.95E-53 | 0.288657293 | 0.785 | 0.523 | 1.67E-48 | 18 | ANAPC16  |
| 1.23E-52 | 0.320362986 | 0.774 | 0.541 | 2.30E-48 | 18 | JTB      |
| 1.41E-52 | 0.311461515 | 0.308 | 0.118 | 2.63E-48 | 18 | PVT1     |
| 1.59E-52 | 0.339354254 | 0.512 | 0.252 | 2.96E-48 | 18 | NDUFB6   |
| 1.81E-52 | 0.318946715 | 0.341 | 0.132 | 3.37E-48 | 18 | FKBP4    |
| 3.43E-52 | 0.301050758 | 0.564 | 0.303 | 6.40E-48 | 18 | NDUFA12  |
| 3.46E-52 | 0.285436274 | 0.566 | 0.311 | 6.46E-48 | 18 | PSMA4    |
| 3.48E-52 | 0.381812667 | 0.814 | 0.612 | 6.48E-48 | 18 | COX7A2   |
| 5.39E-52 | 0.279807083 | 0.329 | 0.119 | 1.01E-47 | 18 | TIMM8B   |
| 6.52E-52 | 0.277184463 | 0.97  | 0.858 | 1.22E-47 | 18 | COX7C    |
| 8.86E-52 | 0.319695034 | 0.751 | 0.495 | 1.65E-47 | 18 | C19orf53 |
| 1.35E-51 | 0.314137736 | 0.72  | 0.467 | 2.52E-47 | 18 | GNG5     |
| 1.51E-51 | 0.316864184 | 0.757 | 0.513 | 2.81E-47 | 18 | HNRNPM   |
| 2.66E-51 | 0.279671541 | 0.505 | 0.258 | 4.96E-47 | 18 | CARD11   |
| 2.83E-51 | 0.312673105 | 0.67  | 0.407 | 5.27E-47 | 18 | ARPC1B   |
| 4.59E-51 | 0.274939693 | 0.715 | 0.473 | 8.56E-47 | 18 | HSPE1    |
| 5.54E-51 | 0.475737191 | 0.432 | 0.194 | 1.03E-46 | 18 | CCND2    |
| 6.52E-51 | 0.295096372 | 0.518 | 0.256 | 1.21E-46 | 18 | GYPC     |
| 6.87E-51 | 0.30343968  | 0.588 | 0.33  | 1.28E-46 | 18 | RAP1A    |
| 7.17E-51 | 0.301369221 | 0.921 | 0.756 | 1.34E-46 | 18 | SNRPD2   |
| 7.96E-51 | 0.356303404 | 0.735 | 0.485 | 1.48E-46 | 18 | LCP1     |
| 1.58E-50 | 0.267951979 | 0.4   | 0.183 | 2.95E-46 | 18 | TIMM10   |
| 1.78E-50 | 0.348335044 | 0.925 | 0.768 | 3.31E-46 | 18 | ARPC2    |
| 2.18E-50 | 0.256771427 | 0.411 | 0.173 | 4.07E-46 | 18 | STOML2   |
| 5.17E-50 | 0.286530479 | 0.46  | 0.228 | 9.63E-46 | 18 | PHTF1    |
| 1.29E-49 | 0.267867544 | 0.515 | 0.266 | 2.41E-45 | 18 | PSMC3    |
| 1.54E-49 | 0.279325736 | 0.609 | 0.35  | 2.88E-45 | 18 | MPG      |
| 3.48E-49 | 0.251080054 | 0.499 | 0.25  | 6.48E-45 | 18 | ASNA1    |
| 3.81E-49 | 0.300839843 | 0.789 | 0.538 | 7.10E-45 | 18 | GMFG     |
| 1.05E-48 | 0.355544242 | 0.825 | 0.637 | 1.96E-44 | 18 | MTDH     |
| 1.42E-48 | 0.292107587 | 0.787 | 0.55  | 2.65E-44 | 18 | HMGN1    |
| 1.95E-48 | 0.776110752 | 0.815 | 0.595 | 3.64E-44 | 18 | SSR4     |
| 2.46E-48 | 0.250933875 | 0.932 | 0.77  | 4.59E-44 | 18 | UBB      |
| 2.47E-48 | 0.267930855 | 0.526 | 0.296 | 4.60E-44 | 18 | PSMB2    |
| 4.48E-48 | 0.253476637 | 0.863 | 0.658 | 8.35E-44 | 18 | HNRNPA3  |
| 6.59E-48 | 0.298928349 | 0.372 | 0.157 | 1.23E-43 | 18 | WSB2     |
| 7.06E-48 | 0.284342977 | 0.906 | 0.711 | 1.32E-43 | 18 | RPL36A   |
| 9.84E-48 | 0.256336095 | 0.488 | 0.258 | 1.83E-43 | 18 | PSMA3    |
| 1.04E-47 | 0.304232857 | 0.558 | 0.302 | 1.94E-43 | 18 | GPI      |
| 1.86E-47 | 0.906708267 | 0.836 | 0.625 | 3.47E-43 | 18 | HSP90B1  |
| 2.11E-47 | 0.308708856 | 0.652 | 0.397 | 3.94E-43 | 18 | DPP7     |
| 2.39E-47 | 0.292526003 | 0.594 | 0.346 | 4.45E-43 | 18 | SEM1     |
| 2.73E-47 | 0.469614552 | 0.625 | 0.402 | 5.09E-43 | 18 | P4HB     |
| 3.04E-47 | 0.257133055 | 0.486 | 0.253 | 5.66E-43 | 18 | SLC25A39 |
| 3.98E-47 | 0.25868563  | 0.577 | 0.336 | 7.42E-43 | 18 | MRPL20   |

|          |             |       |       |          |    |          |
|----------|-------------|-------|-------|----------|----|----------|
| 6.25E-47 | 0.255066482 | 0.499 | 0.25  | 1.16E-42 | 18 | TXN2     |
| 1.58E-46 | 0.465954472 | 0.929 | 0.782 | 2.95E-42 | 18 | NCL      |
| 1.59E-46 | 0.275184392 | 0.622 | 0.396 | 2.97E-42 | 18 | NOP10    |
| 2.12E-46 | 0.276961274 | 0.654 | 0.423 | 3.95E-42 | 18 | CCT4     |
| 2.24E-46 | 0.28198023  | 0.71  | 0.467 | 4.18E-42 | 18 | PSMB8    |
| 5.57E-46 | 0.258395931 | 0.54  | 0.279 | 1.04E-41 | 18 | BST2     |
| 6.38E-46 | 0.293939549 | 0.67  | 0.45  | 1.19E-41 | 18 | ATP5MD   |
| 7.72E-46 | 0.272218786 | 0.576 | 0.333 | 1.44E-41 | 18 | AURKAIP1 |
| 9.42E-46 | 0.25425308  | 0.426 | 0.202 | 1.76E-41 | 18 | CTSA     |
| 2.71E-45 | 0.2508133   | 0.471 | 0.224 | 5.05E-41 | 18 | THOC7    |
| 2.72E-45 | 0.296801246 | 0.831 | 0.615 | 5.07E-41 | 18 | NAP1L1   |
| 3.91E-45 | 0.294403639 | 0.523 | 0.295 | 7.29E-41 | 18 | MRPL51   |
| 8.18E-45 | 0.282285994 | 0.55  | 0.301 | 1.52E-40 | 18 | GTF3C6   |
| 1.79E-44 | 0.262231988 | 0.704 | 0.473 | 3.33E-40 | 18 | VAMP8    |
| 2.32E-44 | 0.281918412 | 0.645 | 0.391 | 4.32E-40 | 18 | ANP32A   |
| 2.54E-44 | 0.292862354 | 0.726 | 0.463 | 4.73E-40 | 18 | CSK      |
| 3.25E-44 | 0.258360794 | 0.601 | 0.355 | 6.06E-40 | 18 | COPS9    |
| 3.91E-44 | 0.269316902 | 0.6   | 0.358 | 7.29E-40 | 18 | MDH1     |
| 7.63E-44 | 0.288069627 | 0.654 | 0.43  | 1.42E-39 | 18 | POMP     |
| 9.67E-44 | 0.333255138 | 0.911 | 0.704 | 1.80E-39 | 18 | RAC2     |
| 1.12E-43 | 0.269778676 | 0.884 | 0.71  | 2.09E-39 | 18 | EDF1     |
| 1.33E-43 | 0.258612495 | 0.721 | 0.48  | 2.48E-39 | 18 | RSL1D1   |
| 1.76E-43 | 0.254371794 | 0.673 | 0.416 | 3.28E-39 | 18 | LAMTOR1  |
| 2.29E-43 | 0.250343071 | 0.442 | 0.215 | 4.26E-39 | 18 | RPA3     |
| 3.71E-43 | 0.307402454 | 0.688 | 0.433 | 6.92E-39 | 18 | CCDC85B  |
| 1.57E-42 | 0.264319178 | 0.901 | 0.732 | 2.93E-38 | 18 | OST4     |
| 2.39E-42 | 0.284906919 | 0.639 | 0.429 | 4.45E-38 | 18 | SPCS2    |
| 3.26E-42 | 0.250013208 | 0.513 | 0.29  | 6.08E-38 | 18 | NDUFAF3  |
| 5.12E-42 | 0.332210802 | 0.631 | 0.406 | 9.55E-38 | 18 | CCT2     |
| 6.22E-42 | 0.884859727 | 0.533 | 0.318 | 1.16E-37 | 18 | MZB1     |
| 7.20E-42 | 0.501092085 | 0.34  | 0.149 | 1.34E-37 | 18 | PDIA4    |
| 1.06E-41 | 0.317428244 | 0.683 | 0.459 | 1.97E-37 | 18 | IFITM2   |
| 1.03E-40 | 0.75662281  | 0.492 | 0.291 | 1.92E-36 | 18 | SEC11C   |
| 1.04E-40 | 0.262205826 | 0.735 | 0.492 | 1.93E-36 | 18 | RNH1     |
| 1.65E-40 | 0.253693263 | 0.65  | 0.407 | 3.08E-36 | 18 | ATP6V1F  |
| 2.76E-40 | 0.268107225 | 0.525 | 0.286 | 5.14E-36 | 18 | UBE2L6   |
| 3.22E-40 | 0.395309746 | 0.463 | 0.257 | 6.01E-36 | 18 | HM13     |
| 3.61E-40 | 0.265829142 | 0.656 | 0.416 | 6.73E-36 | 18 | RAD23A   |
| 3.62E-40 | 0.33680104  | 0.847 | 0.664 | 6.74E-36 | 18 | UQCRH    |
| 7.26E-40 | 0.263117423 | 0.78  | 0.559 | 1.35E-35 | 18 | ST13     |
| 1.14E-39 | 0.260418057 | 0.621 | 0.42  | 2.13E-35 | 18 | TMED9    |
| 1.44E-39 | 0.326061767 | 0.809 | 0.631 | 2.68E-35 | 18 | ATP5F1B  |
| 2.95E-39 | 0.893058935 | 0.868 | 0.692 | 5.50E-35 | 18 | PPIB     |
| 9.06E-39 | 0.251868486 | 0.729 | 0.517 | 1.69E-34 | 18 | PGK1     |
| 1.29E-38 | 0.252234993 | 0.542 | 0.307 | 2.41E-34 | 18 | RNF181   |
| 2.97E-38 | 0.260684552 | 0.733 | 0.519 | 5.53E-34 | 18 | NDUFS5   |

|           |             |       |       |           |    |                         |
|-----------|-------------|-------|-------|-----------|----|-------------------------|
| 3.63E-38  | 0.266968995 | 0.319 | 0.139 | 6.77E-34  | 18 | PRDX4                   |
| 3.97E-38  | 0.345791271 | 0.453 | 0.246 | 7.40E-34  | 18 | OSTC                    |
| 7.79E-38  | 0.257754714 | 0.58  | 0.356 | 1.45E-33  | 18 | NDUFC1                  |
| 2.66E-37  | 0.279074926 | 0.702 | 0.476 | 4.95E-33  | 18 | ILF2                    |
| 1.15E-35  | 0.253578238 | 0.451 | 0.248 | 2.15E-31  | 18 | RRP7A                   |
| 1.72E-35  | 0.253879389 | 0.278 | 0.119 | 3.21E-31  | 18 | CCDC167                 |
| 1.92E-35  | 0.476137047 | 0.767 | 0.586 | 3.58E-31  | 18 | SEC61B                  |
| 1.53E-34  | 0.27809849  | 0.54  | 0.345 | 2.85E-30  | 18 | RPN2                    |
| 2.92E-34  | 0.322340584 | 0.873 | 0.707 | 5.44E-30  | 18 | HMGN2                   |
| 3.25E-34  | 0.298703586 | 0.595 | 0.374 | 6.06E-30  | 18 | HMGA1                   |
| 1.86E-33  | 0.727991081 | 0.806 | 0.646 | 3.47E-29  | 18 | SUB1                    |
| 2.82E-32  | 0.264597969 | 0.823 | 0.641 | 5.26E-28  | 18 | GABARAP                 |
| 5.05E-32  | 0.300736729 | 0.773 | 0.573 | 9.41E-28  | 18 | RPS4Y1                  |
| 3.22E-30  | 0.27386939  | 0.872 | 0.675 | 6.01E-26  | 18 | FCER2                   |
| 4.39E-30  | 0.419954264 | 0.831 | 0.678 | 8.18E-26  | 18 | TUBA1B                  |
| 8.31E-29  | 0.562533132 | 0.233 | 0.107 | 1.55E-24  | 18 | TXNDC5                  |
| 2.54E-28  | 0.260857618 | 0.558 | 0.357 | 4.73E-24  | 18 | FDFT1                   |
| 3.14E-27  | 0.31067818  | 0.284 | 0.14  | 5.84E-23  | 18 | PRDX2                   |
| 7.03E-26  | 0.318545336 | 0.289 | 0.142 | 1.31E-21  | 18 | MANF                    |
| 1.13E-23  | 0.295660982 | 0.603 | 0.405 | 2.11E-19  | 18 | DDOST                   |
| 2.46E-20  | 0.459531176 | 0.586 | 0.421 | 4.59E-16  | 18 | UBE2J1                  |
| 7.86E-13  | 0.380673545 | 0.501 | 0.349 | 1.47E-08  | 18 | SSR3                    |
| 1.91E-12  | 0.260632718 | 0.669 | 0.551 | 3.57E-08  | 18 | HSPA5                   |
| 3.16E-204 | 0.687625622 | 0.984 | 0.759 | 5.90E-200 | 19 | RALGPS2                 |
| 4.81E-196 | 0.71630909  | 0.97  | 0.686 | 8.96E-192 | 19 | DDX17                   |
| 1.08E-169 | 0.713708876 | 0.836 | 0.407 | 2.01E-165 | 19 | PARP15                  |
| 2.33E-163 | 0.740403534 | 0.907 | 0.542 | 4.34E-159 | 19 | MSI2                    |
| 8.07E-161 | 0.741079663 | 0.905 | 0.531 | 1.50E-156 | 19 | STX7                    |
| 8.02E-137 | 0.539880661 | 0.93  | 0.655 | 1.50E-132 | 19 | AFF3                    |
| 1.72E-134 | 0.58827666  | 0.954 | 0.711 | 3.21E-130 | 19 | SMCHD1                  |
| 5.63E-133 | 0.638841503 | 0.881 | 0.514 | 1.05E-128 | 19 | OGT                     |
| 6.43E-132 | 0.581649445 | 0.912 | 0.585 | 1.20E-127 | 19 | ABCA6                   |
| 3.28E-124 | 0.566907046 | 0.764 | 0.376 | 6.11E-120 | 19 | NKTR                    |
| 6.16E-123 | 0.687693281 | 0.894 | 0.569 | 1.15E-118 | 19 | TTN                     |
| 1.77E-122 | 0.565184118 | 0.895 | 0.57  | 3.29E-118 | 19 | CDK14                   |
| 5.98E-122 | 0.66183036  | 0.739 | 0.349 | 1.11E-117 | 19 | GABPB1-AS1              |
| 3.34E-119 | 0.713314093 | 0.747 | 0.349 | 6.22E-115 | 19 | CLNK                    |
| 5.72E-119 | 0.526357255 | 0.538 | 0.155 | 1.07E-114 | 19 | POLR2J3-ENSG00000285437 |
| 8.60E-119 | 0.60673715  | 0.977 | 0.837 | 1.60E-114 | 19 | TCF4                    |
| 9.29E-118 | 0.66329999  | 0.927 | 0.637 | 1.73E-113 | 19 | CCDC88A                 |
| 1.09E-115 | 0.521509515 | 0.847 | 0.49  | 2.04E-111 | 19 | ANKRD44                 |
| 2.50E-115 | 0.508003952 | 0.94  | 0.72  | 4.65E-111 | 19 | ARHGAP24                |
| 8.12E-111 | 0.50381455  | 0.727 | 0.339 | 1.51E-106 | 19 | MCTP2                   |
| 3.82E-109 | 0.638495847 | 0.84  | 0.505 | 7.12E-105 | 19 | FAM129C                 |
| 5.22E-108 | 0.475964547 | 0.605 | 0.218 | 9.73E-104 | 19 | GAB1                    |
| 3.39E-107 | 0.504321838 | 0.91  | 0.631 | 6.31E-103 | 19 | RIPOR2                  |

|           |             |       |       |           |    |          |
|-----------|-------------|-------|-------|-----------|----|----------|
| 3.86E-106 | 0.437379196 | 0.687 | 0.292 | 7.19E-102 | 19 | RNPC3    |
| 4.67E-106 | 0.53401175  | 0.742 | 0.36  | 8.71E-102 | 19 | CAMK2D   |
| 6.66E-105 | 0.641565381 | 0.564 | 0.204 | 1.24E-100 | 19 | SERINC5  |
| 1.64E-104 | 0.5617906   | 0.776 | 0.401 | 3.06E-100 | 19 | ATM      |
| 2.28E-104 | 0.442667404 | 0.819 | 0.46  | 4.25E-100 | 19 | VPS13C   |
| 5.49E-104 | 0.444811502 | 0.688 | 0.313 | 1.02E-99  | 19 | PHC3     |
| 4.48E-103 | 0.425896806 | 0.881 | 0.565 | 8.35E-99  | 19 | PNN      |
| 6.35E-103 | 0.508927777 | 0.74  | 0.368 | 1.18E-98  | 19 | ARID1B   |
| 1.70E-100 | 0.506478664 | 0.95  | 0.734 | 3.17E-96  | 19 | PNISR    |
| 1.37E-99  | 0.498713035 | 0.629 | 0.246 | 2.55E-95  | 19 | CCDC141  |
| 8.69E-97  | 0.395374518 | 0.928 | 0.664 | 1.62E-92  | 19 | RSRP1    |
| 1.37E-95  | 0.495600902 | 0.832 | 0.529 | 2.56E-91  | 19 | BCL2     |
| 4.27E-94  | 0.40378417  | 0.788 | 0.429 | 7.95E-90  | 19 | TMEM131L |
| 9.26E-94  | 0.427205439 | 0.608 | 0.261 | 1.73E-89  | 19 | UTY      |
| 1.16E-93  | 0.398610333 | 0.673 | 0.325 | 2.15E-89  | 19 | DOCK10   |
| 2.08E-93  | 0.388671831 | 0.833 | 0.533 | 3.88E-89  | 19 | N4BP2L2  |
| 3.66E-93  | 0.421802162 | 0.764 | 0.423 | 6.82E-89  | 19 | ZNF292   |
| 5.20E-93  | 0.427835599 | 0.718 | 0.363 | 9.69E-89  | 19 | MDM4     |
| 8.48E-92  | 0.520520109 | 0.761 | 0.385 | 1.58E-87  | 19 | Mar-01   |
| 1.70E-91  | 0.46497883  | 0.712 | 0.373 | 3.17E-87  | 19 | WDR11    |
| 1.73E-90  | 0.391015773 | 0.755 | 0.421 | 3.23E-86  | 19 | SNX29    |
| 2.47E-90  | 0.423729104 | 0.547 | 0.208 | 4.60E-86  | 19 | ADAMTS6  |
| 2.55E-90  | 0.401174669 | 0.578 | 0.236 | 4.76E-86  | 19 | GOLGA8B  |
| 9.11E-90  | 0.33358284  | 0.414 | 0.104 | 1.70E-85  | 19 | TRIM73   |
| 2.43E-89  | 0.404599171 | 0.708 | 0.359 | 4.52E-85  | 19 | CREB3L2  |
| 8.89E-89  | 0.488854358 | 0.866 | 0.564 | 1.66E-84  | 19 | IKZF3    |
| 3.59E-88  | 0.436772836 | 0.58  | 0.234 | 6.68E-84  | 19 | ADAM19   |
| 6.60E-88  | 0.42776447  | 0.802 | 0.468 | 1.23E-83  | 19 | SNRNP70  |
| 3.83E-87  | 0.505457452 | 0.784 | 0.482 | 7.14E-83  | 19 | BCL11A   |
| 2.22E-86  | 0.368158519 | 0.465 | 0.152 | 4.14E-82  | 19 | FTX      |
| 3.34E-86  | 0.3152843   | 0.55  | 0.22  | 6.22E-82  | 19 | CREBZF   |
| 1.60E-85  | 0.449110258 | 0.821 | 0.494 | 2.99E-81  | 19 | INPP5F   |
| 2.14E-85  | 0.470277894 | 0.811 | 0.471 | 3.98E-81  | 19 | OGA      |
| 7.41E-85  | 0.422531896 | 0.77  | 0.413 | 1.38E-80  | 19 | ZRANB2   |
| 2.58E-84  | 0.462469847 | 0.836 | 0.528 | 4.80E-80  | 19 | LUC7L3   |
| 3.13E-84  | 0.479016774 | 0.638 | 0.297 | 5.83E-80  | 19 | TTC14    |
| 1.53E-83  | 0.355767666 | 0.544 | 0.208 | 2.85E-79  | 19 | KHDRBS2  |
| 5.57E-83  | 0.382439366 | 0.671 | 0.322 | 1.04E-78  | 19 | TLE4     |
| 4.86E-82  | 0.396873857 | 0.777 | 0.467 | 9.06E-78  | 19 | TUT4     |
| 5.54E-82  | 0.50635431  | 0.847 | 0.544 | 1.03E-77  | 19 | LRMP     |
| 7.62E-82  | 0.424767774 | 0.988 | 0.866 | 1.42E-77  | 19 | FOXP1    |
| 1.27E-80  | 0.457605874 | 0.753 | 0.395 | 2.36E-76  | 19 | TRAF3IP3 |
| 4.89E-80  | 0.384097776 | 0.884 | 0.602 | 9.11E-76  | 19 | NCOA3    |
| 4.96E-79  | 0.345932532 | 0.964 | 0.789 | 9.25E-75  | 19 | FUS      |
| 5.80E-79  | 0.338192229 | 0.973 | 0.835 | 1.08E-74  | 19 | SF1      |
| 1.41E-78  | 0.370667663 | 0.571 | 0.255 | 2.62E-74  | 19 | DNAJC10  |



|          |             |       |       |          |    |            |
|----------|-------------|-------|-------|----------|----|------------|
| 8.91E-78 | 0.483699903 | 0.582 | 0.243 | 1.66E-73 | 19 | PCDH9      |
| 1.06E-77 | 0.335093433 | 0.858 | 0.55  | 1.98E-73 | 19 | SSH2       |
| 2.79E-77 | 0.410059501 | 0.837 | 0.551 | 5.19E-73 | 19 | PELI1      |
| 2.82E-77 | 0.395899982 | 0.812 | 0.526 | 5.25E-73 | 19 | TNRC6B     |
| 4.69E-77 | 0.350897717 | 0.557 | 0.254 | 8.73E-73 | 19 | DDHD1      |
| 1.85E-76 | 0.395303906 | 0.688 | 0.37  | 3.45E-72 | 19 | GTF2I      |
| 2.39E-76 | 0.386935447 | 0.647 | 0.313 | 4.45E-72 | 19 | SLC9A7     |
| 9.72E-76 | 0.361869402 | 0.958 | 0.81  | 1.81E-71 | 19 | PTPRC      |
| 1.08E-75 | 0.400218856 | 0.9   | 0.662 | 2.02E-71 | 19 | ARGLU1     |
| 3.66E-75 | 0.366231524 | 0.533 | 0.243 | 6.83E-71 | 19 | CD84       |
| 9.07E-75 | 0.452042049 | 0.518 | 0.199 | 1.69E-70 | 19 | HIBCH      |
| 1.63E-74 | 0.390972615 | 0.702 | 0.382 | 3.04E-70 | 19 | ZBTB20     |
| 9.48E-74 | 0.333778671 | 0.958 | 0.815 | 1.77E-69 | 19 | RBM39      |
| 9.77E-74 | 0.320627919 | 0.741 | 0.446 | 1.82E-69 | 19 | ARHGAP15   |
| 7.59E-73 | 0.398403933 | 0.698 | 0.383 | 1.41E-68 | 19 | ZNF107     |
| 2.49E-71 | 0.312439023 | 0.702 | 0.397 | 4.64E-67 | 19 | SKAP1      |
| 3.59E-71 | 0.340370208 | 0.547 | 0.245 | 6.70E-67 | 19 | SLC23A2    |
| 8.76E-71 | 0.437041541 | 0.868 | 0.624 | 1.63E-66 | 19 | RCSD1      |
| 9.79E-71 | 0.43166004  | 0.529 | 0.238 | 1.83E-66 | 19 | LINC02397  |
| 1.36E-70 | 0.339033017 | 0.715 | 0.389 | 2.53E-66 | 19 | ASH1L      |
| 1.58E-70 | 0.349859436 | 0.51  | 0.197 | 2.95E-66 | 19 | AC012368.1 |
| 5.42E-70 | 0.348844442 | 0.563 | 0.258 | 1.01E-65 | 19 | PHKB       |
| 9.15E-70 | 0.517639916 | 0.578 | 0.288 | 1.71E-65 | 19 | ZNF266     |
| 3.10E-68 | 0.370874066 | 0.767 | 0.463 | 5.77E-64 | 19 | ZCCHC7     |
| 5.57E-68 | 0.289274741 | 0.662 | 0.35  | 1.04E-63 | 19 | UTRN       |
| 2.29E-67 | 0.265833506 | 0.377 | 0.12  | 4.27E-63 | 19 | PPP1R3E    |
| 6.63E-67 | 0.317140454 | 0.691 | 0.381 | 1.24E-62 | 19 | LENG8      |
| 7.38E-67 | 0.396650999 | 0.687 | 0.37  | 1.38E-62 | 19 | CIITA      |
| 1.10E-66 | 0.358052725 | 0.88  | 0.622 | 2.05E-62 | 19 | JMJD1C     |
| 2.94E-66 | 0.322320015 | 0.9   | 0.652 | 5.47E-62 | 19 | SRSF11     |
| 3.49E-66 | 0.299715211 | 0.554 | 0.263 | 6.51E-62 | 19 | RBM5       |
| 4.37E-66 | 0.346465855 | 0.765 | 0.474 | 8.15E-62 | 19 | PCM1       |
| 4.48E-66 | 0.387619348 | 0.821 | 0.541 | 8.34E-62 | 19 | LINC00926  |
| 4.50E-66 | 0.303093793 | 0.63  | 0.329 | 8.40E-62 | 19 | SECISBP2   |
| 5.00E-66 | 0.279063693 | 0.494 | 0.218 | 9.32E-62 | 19 | CEP95      |
| 8.47E-66 | 0.370259044 | 0.961 | 0.788 | 1.58E-61 | 19 | TXNIP      |
| 8.81E-66 | 0.306453359 | 0.33  | 0.098 | 1.64E-61 | 19 | LINC02363  |
| 1.93E-65 | 0.330617012 | 0.576 | 0.273 | 3.60E-61 | 19 | MCOLN2     |
| 2.13E-65 | 0.333352026 | 0.402 | 0.139 | 3.97E-61 | 19 | HDAC9      |
| 2.46E-65 | 0.325060588 | 0.542 | 0.245 | 4.58E-61 | 19 | CBLB       |
| 2.65E-65 | 0.295907645 | 0.568 | 0.289 | 4.95E-61 | 19 | BRWD1      |
| 4.23E-65 | 0.381993932 | 0.84  | 0.573 | 7.88E-61 | 19 | SYK        |
| 5.12E-65 | 0.259816334 | 0.397 | 0.157 | 9.55E-61 | 19 | NPIP5      |
| 8.76E-65 | 0.285666245 | 0.447 | 0.163 | 1.63E-60 | 19 | LRRK2      |
| 1.51E-64 | 0.306990433 | 0.401 | 0.142 | 2.81E-60 | 19 | ZDHHC21    |
| 2.14E-64 | 0.322839516 | 0.661 | 0.35  | 3.98E-60 | 19 | ACSM3      |

|          |             |       |       |          |    |            |
|----------|-------------|-------|-------|----------|----|------------|
| 3.20E-64 | 0.37753279  | 0.826 | 0.543 | 5.97E-60 | 19 | CELF2      |
| 4.80E-64 | 0.356614296 | 0.529 | 0.22  | 8.95E-60 | 19 | AC119396.1 |
| 1.34E-63 | 0.330625126 | 0.635 | 0.327 | 2.50E-59 | 19 | AL158850.1 |
| 1.87E-63 | 0.320343557 | 0.736 | 0.447 | 3.48E-59 | 19 | HNRNPH1    |
| 2.29E-63 | 0.296711177 | 0.424 | 0.158 | 4.28E-59 | 19 | MBD5       |
| 2.94E-63 | 0.300799745 | 0.571 | 0.264 | 5.48E-59 | 19 | GSAP       |
| 4.67E-63 | 0.3322022   | 0.462 | 0.19  | 8.71E-59 | 19 | ZNF101     |
| 1.04E-62 | 0.347265855 | 0.822 | 0.561 | 1.94E-58 | 19 | USP15      |
| 1.19E-62 | 0.268637616 | 0.328 | 0.095 | 2.22E-58 | 19 | AL445673.1 |
| 3.54E-62 | 0.282214062 | 0.598 | 0.283 | 6.61E-58 | 19 | RIC1       |
| 3.69E-62 | 0.349770162 | 0.487 | 0.203 | 6.88E-58 | 19 | RASA1      |
| 3.93E-62 | 0.296124746 | 0.605 | 0.294 | 7.33E-58 | 19 | PHTF2      |
| 4.12E-62 | 0.373906544 | 0.86  | 0.641 | 7.68E-58 | 19 | SP100      |
| 7.81E-62 | 0.335295699 | 0.567 | 0.283 | 1.46E-57 | 19 | WDFY1      |
| 9.14E-62 | 0.27373533  | 0.505 | 0.231 | 1.70E-57 | 19 | DMTF1      |
| 9.19E-62 | 0.301249626 | 0.445 | 0.186 | 1.71E-57 | 19 | FBXL20     |
| 9.24E-62 | 0.326581824 | 0.901 | 0.683 | 1.72E-57 | 19 | EPC1       |
| 1.08E-61 | 0.300786427 | 0.61  | 0.326 | 2.01E-57 | 19 | LNPEP      |
| 1.11E-61 | 0.280469703 | 0.545 | 0.261 | 2.06E-57 | 19 | PRKCE      |
| 1.66E-61 | 0.309574127 | 0.378 | 0.121 | 3.10E-57 | 19 | ZNF439     |
| 3.08E-61 | 0.343436245 | 0.802 | 0.509 | 5.75E-57 | 19 | UVRAG      |
| 4.11E-61 | 0.347675772 | 0.688 | 0.4   | 7.65E-57 | 19 | CHD9       |
| 8.98E-61 | 0.273447682 | 0.581 | 0.285 | 1.67E-56 | 19 | TBC1D5     |
| 1.10E-60 | 0.325640517 | 0.499 | 0.21  | 2.05E-56 | 19 | KHDC4      |
| 2.37E-60 | 0.326530932 | 0.519 | 0.229 | 4.42E-56 | 19 | MRNIP      |
| 6.14E-60 | 0.324939275 | 0.604 | 0.327 | 1.14E-55 | 19 | USP34      |
| 6.17E-60 | 0.321470035 | 0.57  | 0.295 | 1.15E-55 | 19 | NSF        |
| 8.15E-60 | 0.301375594 | 0.829 | 0.579 | 1.52E-55 | 19 | TMEM243    |
| 9.02E-60 | 0.366007056 | 0.532 | 0.241 | 1.68E-55 | 19 | CLEC2D     |
| 1.32E-59 | 0.321530924 | 0.484 | 0.196 | 2.46E-55 | 19 | STAMBPL1   |
| 1.46E-59 | 0.326475808 | 0.567 | 0.286 | 2.72E-55 | 19 | CDK13      |
| 1.67E-59 | 0.331482311 | 0.798 | 0.519 | 3.12E-55 | 19 | ZNF207     |
| 1.91E-59 | 0.267402826 | 0.524 | 0.255 | 3.57E-55 | 19 | RABEP2     |
| 2.17E-59 | 0.329428024 | 0.764 | 0.483 | 4.04E-55 | 19 | AKAP9      |
| 3.00E-59 | 0.297588437 | 0.635 | 0.349 | 5.59E-55 | 19 | NFAT5      |
| 4.21E-59 | 0.295363125 | 0.621 | 0.343 | 7.85E-55 | 19 | BIRC6      |
| 5.81E-59 | 0.275335812 | 0.474 | 0.199 | 1.08E-54 | 19 | MAML2      |
| 7.76E-59 | 0.288664671 | 0.581 | 0.32  | 1.45E-54 | 19 | BTA1F1     |
| 1.36E-58 | 0.358885849 | 0.75  | 0.467 | 2.53E-54 | 19 | ADAM28     |
| 1.59E-58 | 0.292248479 | 0.595 | 0.304 | 2.97E-54 | 19 | FRYL       |
| 1.69E-58 | 0.300894161 | 0.801 | 0.529 | 3.14E-54 | 19 | ATRX       |
| 2.81E-58 | 0.252384781 | 0.56  | 0.286 | 5.25E-54 | 19 | MAN2A1     |
| 3.26E-58 | 0.259450065 | 0.402 | 0.158 | 6.09E-54 | 19 | SUGP2      |
| 3.49E-58 | 0.299466303 | 0.558 | 0.274 | 6.51E-54 | 19 | KANSL1     |
| 4.81E-58 | 0.293697169 | 0.622 | 0.319 | 8.97E-54 | 19 | TTC17      |
| 5.03E-58 | 0.313058271 | 0.54  | 0.261 | 9.38E-54 | 19 | PARP14     |

|          |             |       |       |          |    |            |
|----------|-------------|-------|-------|----------|----|------------|
| 6.40E-58 | 0.309629786 | 0.85  | 0.609 | 1.19E-53 | 19 | SCAF11     |
| 7.36E-58 | 0.285681262 | 0.383 | 0.139 | 1.37E-53 | 19 | KDM5D      |
| 8.53E-58 | 0.31507559  | 0.57  | 0.295 | 1.59E-53 | 19 | ADD3       |
| 8.66E-58 | 0.366283907 | 0.726 | 0.429 | 1.61E-53 | 19 | EBLN3P     |
| 1.00E-57 | 0.327619467 | 0.541 | 0.244 | 1.87E-53 | 19 | JAK2       |
| 1.32E-57 | 0.330353721 | 0.734 | 0.44  | 2.45E-53 | 19 | SMG1       |
| 1.69E-57 | 0.317811301 | 0.789 | 0.528 | 3.15E-53 | 19 | CD47       |
| 1.91E-57 | 0.299478578 | 0.759 | 0.479 | 3.56E-53 | 19 | TLK1       |
| 2.56E-57 | 0.351650301 | 0.557 | 0.277 | 4.78E-53 | 19 | SLC12A6    |
| 2.96E-57 | 0.336613343 | 0.555 | 0.26  | 5.52E-53 | 19 | BTLA       |
| 3.24E-57 | 0.273417288 | 0.426 | 0.178 | 6.03E-53 | 19 | NHLRC3     |
| 3.58E-57 | 0.332525526 | 0.636 | 0.348 | 6.67E-53 | 19 | RNF19A     |
| 6.56E-57 | 0.33719674  | 0.757 | 0.468 | 1.22E-52 | 19 | PLEKHG1    |
| 7.58E-57 | 0.311008271 | 0.864 | 0.628 | 1.41E-52 | 19 | SRSF10     |
| 7.69E-57 | 0.342798666 | 0.702 | 0.424 | 1.43E-52 | 19 | SP140      |
| 9.40E-57 | 0.296259559 | 0.63  | 0.355 | 1.75E-52 | 19 | MORC3      |
| 2.31E-56 | 0.311663068 | 0.543 | 0.26  | 4.31E-52 | 19 | GLS        |
| 3.24E-56 | 0.293081182 | 0.657 | 0.389 | 6.03E-52 | 19 | PPP4R3B    |
| 4.76E-56 | 0.484967164 | 0.753 | 0.502 | 8.86E-52 | 19 | IL4R       |
| 6.47E-56 | 0.295734688 | 0.56  | 0.264 | 1.21E-51 | 19 | TRAF5      |
| 1.50E-55 | 0.293701079 | 0.564 | 0.298 | 2.80E-51 | 19 | LUC7L      |
| 2.73E-55 | 0.258370739 | 0.561 | 0.289 | 5.09E-51 | 19 | FCHSD2     |
| 2.90E-55 | 0.330204642 | 0.64  | 0.354 | 5.41E-51 | 19 | SREK1      |
| 3.02E-55 | 0.303547314 | 0.478 | 0.228 | 5.62E-51 | 19 | SMC6       |
| 3.10E-55 | 0.40869655  | 0.333 | 0.112 | 5.77E-51 | 19 | TSHZ2      |
| 3.14E-55 | 0.303271177 | 0.609 | 0.325 | 5.85E-51 | 19 | LPP        |
| 3.39E-55 | 0.550837938 | 0.478 | 0.213 | 6.32E-51 | 19 | AC063949.2 |
| 5.70E-55 | 0.286641035 | 0.373 | 0.137 | 1.06E-50 | 19 | CCDC14     |
| 1.17E-54 | 0.276266474 | 0.538 | 0.248 | 2.18E-50 | 19 | MON2       |
| 2.21E-54 | 0.301195493 | 0.44  | 0.198 | 4.12E-50 | 19 | OSBPL10    |
| 2.45E-54 | 0.294473595 | 0.749 | 0.498 | 4.56E-50 | 19 | FNBP4      |
| 3.71E-54 | 0.399925092 | 0.865 | 0.654 | 6.92E-50 | 19 | PRKCB      |
| 4.57E-54 | 0.294159709 | 0.549 | 0.281 | 8.52E-50 | 19 | SPG7       |
| 1.07E-53 | 0.292570154 | 0.703 | 0.433 | 2.00E-49 | 19 | PPM1K      |
| 1.09E-53 | 0.255422062 | 0.477 | 0.22  | 2.03E-49 | 19 | CCNT2      |
| 1.75E-53 | 0.281738488 | 0.508 | 0.245 | 3.25E-49 | 19 | BICD1      |
| 1.94E-53 | 0.288083807 | 0.416 | 0.166 | 3.62E-49 | 19 | IL6ST      |
| 3.08E-53 | 0.274761398 | 0.488 | 0.227 | 5.73E-49 | 19 | DGKD       |
| 3.24E-53 | 0.310108533 | 0.694 | 0.423 | 6.03E-49 | 19 | TNFAIP8    |
| 3.33E-53 | 0.41183053  | 0.854 | 0.595 | 6.21E-49 | 19 | POU2F2     |
| 3.53E-53 | 0.257242179 | 0.755 | 0.518 | 6.58E-49 | 19 | ABI1       |
| 5.78E-53 | 0.276597601 | 0.56  | 0.302 | 1.08E-48 | 19 | PCMTD1     |
| 7.72E-53 | 0.299468532 | 0.871 | 0.636 | 1.44E-48 | 19 | RUBCNL     |
| 8.03E-53 | 0.252388262 | 0.584 | 0.321 | 1.50E-48 | 19 | ZNF638     |
| 1.01E-52 | 0.289024046 | 0.553 | 0.281 | 1.88E-48 | 19 | CLEC17A    |
| 5.57E-52 | 0.282288575 | 0.697 | 0.448 | 1.04E-47 | 19 | MYCBP2     |

|          |             |       |       |          |    |            |
|----------|-------------|-------|-------|----------|----|------------|
| 5.95E-52 | 0.295569683 | 0.241 | 0.055 | 1.11E-47 | 19 | AC245060.5 |
| 8.05E-52 | 0.312046613 | 0.353 | 0.128 | 1.50E-47 | 19 | ZNF37A     |
| 1.22E-51 | 0.359334642 | 0.573 | 0.327 | 2.27E-47 | 19 | DMD        |
| 2.55E-51 | 0.279061201 | 0.63  | 0.361 | 4.75E-47 | 19 | TGFBR2     |
| 3.22E-51 | 0.270076282 | 0.584 | 0.326 | 5.99E-47 | 19 | MIS18BP1   |
| 3.24E-51 | 0.302320939 | 0.84  | 0.602 | 6.03E-47 | 19 | SYNE2      |
| 3.60E-51 | 0.267283152 | 0.692 | 0.42  | 6.70E-47 | 19 | NEMF       |
| 3.73E-51 | 0.259022687 | 0.446 | 0.194 | 6.95E-47 | 19 | NUP88      |
| 3.98E-51 | 0.324957602 | 0.579 | 0.32  | 7.41E-47 | 19 | BOD1L1     |
| 5.50E-51 | 0.322064956 | 0.875 | 0.672 | 1.03E-46 | 19 | SF3B1      |
| 6.56E-51 | 0.305792932 | 0.523 | 0.262 | 1.22E-46 | 19 | STIM2      |
| 6.73E-51 | 0.269038062 | 0.542 | 0.273 | 1.25E-46 | 19 | IMMP2L     |
| 1.28E-50 | 0.282676731 | 0.584 | 0.319 | 2.39E-46 | 19 | MZB1       |
| 1.41E-50 | 0.288730537 | 0.66  | 0.383 | 2.63E-46 | 19 | HECTD1     |
| 2.08E-50 | 0.267621283 | 0.398 | 0.159 | 3.87E-46 | 19 | ANKRD36C   |
| 2.22E-50 | 0.278251784 | 0.433 | 0.191 | 4.14E-46 | 19 | DCLK2      |
| 2.65E-50 | 0.27533271  | 0.356 | 0.124 | 4.94E-46 | 19 | ZMAT1      |
| 8.13E-50 | 0.257940722 | 0.512 | 0.264 | 1.52E-45 | 19 | UBR5       |
| 9.36E-50 | 0.268440649 | 0.703 | 0.454 | 1.74E-45 | 19 | INPP5D     |
| 9.95E-50 | 0.264744453 | 0.391 | 0.158 | 1.85E-45 | 19 | TMEM63A    |
| 1.62E-49 | 0.270880332 | 0.504 | 0.242 | 3.01E-45 | 19 | XRN1       |
| 2.12E-49 | 0.251265995 | 0.422 | 0.18  | 3.95E-45 | 19 | ZNF431     |
| 2.44E-49 | 0.250221099 | 0.536 | 0.272 | 4.55E-45 | 19 | RNASEH2B   |
| 2.48E-49 | 0.325138489 | 0.812 | 0.57  | 4.61E-45 | 19 | KIAA1551   |
| 2.86E-49 | 0.310653638 | 0.407 | 0.166 | 5.34E-45 | 19 | KSR2       |
| 3.15E-49 | 0.257279011 | 0.331 | 0.114 | 5.86E-45 | 19 | GMDS-DT    |
| 3.33E-49 | 0.289741779 | 0.619 | 0.333 | 6.20E-45 | 19 | SPTBN1     |
| 3.46E-49 | 0.275303531 | 0.736 | 0.474 | 6.45E-45 | 19 | BLNK       |
| 3.98E-49 | 0.314170757 | 0.512 | 0.254 | 7.42E-45 | 19 | LYST       |
| 5.43E-49 | 0.302958597 | 0.57  | 0.29  | 1.01E-44 | 19 | ZMYM2      |
| 9.13E-49 | 0.31575718  | 0.7   | 0.437 | 1.70E-44 | 19 | CFLAR      |
| 2.01E-48 | 0.252348727 | 0.553 | 0.296 | 3.75E-44 | 19 | ZFC3H1     |
| 2.90E-48 | 0.275587339 | 0.86  | 0.622 | 5.40E-44 | 19 | SH3BP5     |
| 4.34E-48 | 0.256278243 | 0.532 | 0.271 | 8.10E-44 | 19 | AP1G1      |
| 4.43E-48 | 0.25993368  | 0.416 | 0.17  | 8.25E-44 | 19 | ZNF493     |
| 7.49E-48 | 0.320295524 | 0.94  | 0.769 | 1.40E-43 | 19 | STK4       |
| 3.86E-47 | 0.269792624 | 0.567 | 0.317 | 7.20E-43 | 19 | RBM33      |
| 4.88E-47 | 0.325774499 | 0.646 | 0.374 | 9.09E-43 | 19 | SETX       |
| 1.57E-46 | 0.346156992 | 0.513 | 0.257 | 2.93E-42 | 19 | ARHGAP44   |
| 2.12E-46 | 0.262466409 | 0.664 | 0.424 | 3.95E-42 | 19 | PHIP       |
| 3.30E-46 | 0.378050273 | 0.635 | 0.36  | 6.15E-42 | 19 | KIAA0040   |
| 3.33E-46 | 0.298595884 | 0.64  | 0.391 | 6.20E-42 | 19 | CLINT1     |
| 4.73E-46 | 0.304419918 | 0.659 | 0.408 | 8.81E-42 | 19 | NCKAP1L    |
| 7.90E-46 | 0.254421287 | 0.472 | 0.239 | 1.47E-41 | 19 | ZNF506     |
| 9.95E-46 | 0.545286858 | 0.712 | 0.489 | 1.85E-41 | 19 | IGLL5      |
| 1.03E-45 | 0.285676691 | 0.67  | 0.421 | 1.93E-41 | 19 | ZNF800     |

|          |             |       |       |          |    |             |
|----------|-------------|-------|-------|----------|----|-------------|
| 1.45E-45 | 0.25017861  | 0.404 | 0.165 | 2.70E-41 | 19 | ANKRD36     |
| 1.87E-45 | 0.36188014  | 0.739 | 0.502 | 3.48E-41 | 19 | MS4A1       |
| 7.18E-45 | 0.364877705 | 0.715 | 0.446 | 1.34E-40 | 19 | ATF7IP      |
| 8.79E-45 | 0.270872727 | 0.8   | 0.549 | 1.64E-40 | 19 | EVL         |
| 1.17E-44 | 0.272097345 | 0.228 | 0.064 | 2.19E-40 | 19 | WNT16       |
| 1.86E-44 | 0.284988065 | 0.585 | 0.326 | 3.46E-40 | 19 | DGKA        |
| 2.48E-44 | 0.2846163   | 0.864 | 0.658 | 4.63E-40 | 19 | HNRNPA3     |
| 2.92E-44 | 0.262364052 | 0.461 | 0.238 | 5.43E-40 | 19 | RASGRP3     |
| 9.05E-44 | 0.291295034 | 0.633 | 0.379 | 1.69E-39 | 19 | CCDC191     |
| 1.06E-43 | 0.257546633 | 0.865 | 0.646 | 1.97E-39 | 19 | CYTH1       |
| 1.75E-43 | 0.302558935 | 0.661 | 0.389 | 3.26E-39 | 19 | DOCK8       |
| 2.53E-43 | 0.270467898 | 0.47  | 0.23  | 4.71E-39 | 19 | PSMA3-AS1   |
| 2.99E-43 | 0.261740242 | 0.481 | 0.232 | 5.58E-39 | 19 | ITPR1       |
| 1.33E-42 | 0.263228756 | 0.391 | 0.163 | 2.49E-38 | 19 | PMS1        |
| 2.11E-42 | 0.250802744 | 0.604 | 0.373 | 3.93E-38 | 19 | TAOK3       |
| 2.72E-42 | 0.301419141 | 0.856 | 0.625 | 5.07E-38 | 19 | SLC38A1     |
| 2.94E-42 | 0.255767995 | 0.58  | 0.347 | 5.48E-38 | 19 | PCF11       |
| 8.49E-42 | 0.289671103 | 0.49  | 0.265 | 1.58E-37 | 19 | ZNF92       |
| 8.75E-42 | 0.283741612 | 0.759 | 0.506 | 1.63E-37 | 19 | RABGAP1L    |
| 9.41E-42 | 0.324154921 | 0.757 | 0.505 | 1.75E-37 | 19 | MEF2C       |
| 1.22E-40 | 0.270331997 | 0.619 | 0.376 | 2.27E-36 | 19 | CDK5RAP3    |
| 2.04E-40 | 0.254260893 | 0.409 | 0.2   | 3.80E-36 | 19 | TGFBR3      |
| 2.06E-40 | 0.322251418 | 0.677 | 0.448 | 3.85E-36 | 19 | PTPN2       |
| 2.55E-40 | 0.258821569 | 0.707 | 0.46  | 4.75E-36 | 19 | ACAP2       |
| 4.10E-40 | 0.258763016 | 0.329 | 0.133 | 7.65E-36 | 19 | SLC16A1-AS1 |
| 5.00E-40 | 0.254568218 | 0.429 | 0.208 | 9.33E-36 | 19 | PLCL2       |
| 5.35E-40 | 0.282505536 | 0.833 | 0.601 | 9.97E-36 | 19 | SWAP70      |
| 1.00E-39 | 0.256240338 | 0.406 | 0.19  | 1.87E-35 | 19 | NFATC2IP    |
| 1.10E-39 | 0.274245357 | 0.217 | 0.058 | 2.05E-35 | 19 | ZNF804A     |
| 2.72E-39 | 0.28650651  | 0.438 | 0.219 | 5.07E-35 | 19 | ARRDC3      |
| 8.08E-39 | 0.288951455 | 0.37  | 0.161 | 1.51E-34 | 19 | SESTD1      |
| 8.86E-39 | 0.265478751 | 0.543 | 0.289 | 1.65E-34 | 19 | ERICH1      |
| 1.37E-38 | 0.339374253 | 0.698 | 0.469 | 2.56E-34 | 19 | BACH2       |
| 4.33E-38 | 0.257309451 | 0.465 | 0.241 | 8.07E-34 | 19 | QRSL1       |
| 5.68E-38 | 0.25606117  | 0.5   | 0.278 | 1.06E-33 | 19 | AIM2        |
| 8.64E-38 | 0.25831787  | 0.469 | 0.238 | 1.61E-33 | 19 | LONP2       |
| 3.42E-37 | 0.253229738 | 0.532 | 0.287 | 6.38E-33 | 19 | Mar-03      |
| 7.54E-37 | 0.31984244  | 0.891 | 0.676 | 1.41E-32 | 19 | FCER2       |
| 8.91E-37 | 0.267163525 | 0.416 | 0.198 | 1.66E-32 | 19 | FAM214A     |
| 1.16E-36 | 0.258376514 | 0.498 | 0.268 | 2.17E-32 | 19 | ARHGEF3     |
| 1.21E-36 | 0.260983355 | 0.52  | 0.282 | 2.26E-32 | 19 | ETS1        |
| 1.53E-36 | 0.251407039 | 0.622 | 0.363 | 2.86E-32 | 19 | TBC1D22A    |
| 2.04E-36 | 0.270446951 | 0.88  | 0.677 | 3.80E-32 | 19 | BLK         |
| 3.97E-36 | 0.31466204  | 0.691 | 0.471 | 7.41E-32 | 19 | EPB41       |
| 4.62E-36 | 0.304837629 | 0.674 | 0.452 | 8.61E-32 | 19 | AC004687.1  |
| 5.11E-36 | 0.273390928 | 0.771 | 0.563 | 9.52E-32 | 19 | IFT57       |

|           |             |       |       |           |    |         |
|-----------|-------------|-------|-------|-----------|----|---------|
| 1.17E-35  | 0.256886181 | 0.864 | 0.694 | 2.19E-31  | 19 | HNRNPU  |
| 1.53E-35  | 0.254509656 | 0.547 | 0.304 | 2.84E-31  | 19 | NSD1    |
| 8.16E-35  | 0.282993233 | 0.826 | 0.638 | 1.52E-30  | 19 | MTDH    |
| 4.06E-34  | 0.255645087 | 0.412 | 0.201 | 7.56E-30  | 19 | ENTPD1  |
| 6.94E-34  | 0.250009547 | 0.584 | 0.342 | 1.29E-29  | 19 | PDCD6IP |
| 7.90E-34  | 0.268005824 | 0.537 | 0.302 | 1.47E-29  | 19 | SEL1L3  |
| 1.09E-33  | 0.254695768 | 0.53  | 0.319 | 2.03E-29  | 19 | RRBP1   |
| 1.13E-33  | 0.25375323  | 0.379 | 0.174 | 2.10E-29  | 19 | GPM6A   |
| 6.64E-33  | 0.257625277 | 0.43  | 0.221 | 1.24E-28  | 19 | PCSK7   |
| 3.27E-32  | 0.259204555 | 0.338 | 0.139 | 6.09E-28  | 19 | KLF8    |
| 2.17E-31  | 0.538978607 | 0.379 | 0.189 | 4.05E-27  | 19 | SFTPB   |
| 3.54E-30  | 0.270142958 | 0.438 | 0.248 | 6.61E-26  | 19 | FCRL5   |
| 3.81E-27  | 0.252744038 | 0.898 | 0.733 | 7.10E-23  | 19 | ANKRD12 |
| 2.10E-26  | 0.274344225 | 0.838 | 0.644 | 3.91E-22  | 19 | HLA-DMB |
| 6.21E-24  | 0.320990403 | 0.464 | 0.269 | 1.16E-19  | 19 | RHEX    |
| 3.48E-19  | 0.382821496 | 0.284 | 0.157 | 6.49E-15  | 19 | COBLL1  |
| 0         | 2.192187404 | 0.816 | 0.137 | 0         | 20 | MYADM   |
| 0         | 1.474076529 | 0.817 | 0.206 | 0         | 20 | BANK1   |
| 6.28E-286 | 1.53562342  | 0.697 | 0.103 | 1.17E-281 | 20 | MARCKS  |
| 6.43E-194 | 0.966335564 | 0.402 | 0.006 | 1.20E-189 | 20 | PDE4D   |
| 1.82E-182 | 0.997469271 | 0.891 | 0.501 | 3.39E-178 | 20 | MS4A1   |
| 8.64E-179 | 1.110820111 | 0.731 | 0.252 | 1.61E-174 | 20 | TNFAIP3 |
| 2.09E-176 | 0.597298077 | 0.366 | 0.003 | 3.90E-172 | 20 | EBF1    |
| 6.29E-162 | 0.680418231 | 0.94  | 0.67  | 1.17E-157 | 20 | NFKBIA  |
| 3.35E-157 | 0.977439529 | 0.913 | 0.643 | 6.25E-153 | 20 | LTB     |
| 3.55E-157 | 0.649521917 | 0.999 | 0.897 | 6.63E-153 | 20 | RPS20   |
| 2.94E-156 | 1.235297842 | 0.585 | 0.159 | 5.48E-152 | 20 | BCL2A1  |
| 2.08E-151 | 0.734494762 | 0.39  | 0.033 | 3.87E-147 | 20 | FAS     |
| 3.61E-150 | 0.575589034 | 0.33  | 0.008 | 6.73E-146 | 20 | CD80    |
| 5.99E-147 | 0.644335788 | 0.306 | 0.002 | 1.12E-142 | 20 | EBI3    |
| 2.57E-142 | 0.626367066 | 0.565 | 0.141 | 4.79E-138 | 20 | JCHAIN  |
| 3.06E-139 | 0.792364621 | 0.782 | 0.361 | 5.70E-135 | 20 | CMTM6   |
| 1.11E-137 | 0.799258868 | 0.473 | 0.091 | 2.08E-133 | 20 | BASP1   |
| 4.81E-131 | 0.57501656  | 0.458 | 0.076 | 8.96E-127 | 20 | CYBB    |
| 1.36E-128 | 0.62076581  | 0.993 | 0.801 | 2.54E-124 | 20 | TAGLN2  |
| 1.68E-119 | 0.717615492 | 0.693 | 0.266 | 3.13E-115 | 20 | SLC2A3  |
| 5.51E-116 | 0.437538002 | 0.266 | 0.015 | 1.03E-111 | 20 | CR1     |
| 1.26E-115 | 0.711875062 | 0.928 | 0.676 | 2.35E-111 | 20 | CD83    |
| 3.03E-114 | 0.617127245 | 0.468 | 0.109 | 5.64E-110 | 20 | ITGA4   |
| 6.58E-112 | 0.561133402 | 0.587 | 0.209 | 1.23E-107 | 20 | GNG7    |
| 6.10E-111 | 0.409792886 | 0.242 | 0.006 | 1.14E-106 | 20 | PAG1    |
| 1.03E-110 | 0.646828553 | 0.392 | 0.072 | 1.92E-106 | 20 | VPS37B  |
| 2.44E-110 | 0.51654487  | 0.24  | 0.005 | 4.55E-106 | 20 | HOPX    |
| 7.06E-109 | 0.734059782 | 0.731 | 0.361 | 1.32E-104 | 20 | KDM6B   |
| 1.81E-108 | 0.693610226 | 0.726 | 0.376 | 3.38E-104 | 20 | RHOG    |
| 1.29E-106 | 0.604755443 | 0.911 | 0.615 | 2.41E-102 | 20 | TAGAP   |

|           |             |       |       |           |    |            |
|-----------|-------------|-------|-------|-----------|----|------------|
| 1.11E-105 | 0.541498872 | 0.501 | 0.156 | 2.07E-101 | 20 | COBLL1     |
| 1.70E-105 | 0.637565292 | 0.632 | 0.276 | 3.17E-101 | 20 | HIF1A      |
| 4.07E-105 | 0.592148096 | 0.638 | 0.261 | 7.60E-101 | 20 | PARP14     |
| 3.45E-104 | 0.638222125 | 0.222 | 0.002 | 6.43E-100 | 20 | LINC01781  |
| 9.69E-103 | 0.596437801 | 0.763 | 0.418 | 1.81E-98  | 20 | DENND4A    |
| 1.25E-99  | 0.489088266 | 0.378 | 0.078 | 2.33E-95  | 20 | IQSEC1     |
| 1.17E-95  | 0.341726988 | 0.208 | 0.004 | 2.18E-91  | 20 | CSGALNACT1 |
| 1.85E-94  | 0.778442701 | 0.752 | 0.454 | 3.46E-90  | 20 | CD82       |
| 4.93E-92  | 0.550215882 | 0.992 | 0.882 | 9.18E-88  | 20 | HLA-DQA1   |
| 1.11E-91  | 0.634560621 | 0.69  | 0.358 | 2.07E-87  | 20 | MOB3A      |
| 5.66E-91  | 0.65820537  | 0.819 | 0.526 | 1.05E-86  | 20 | ATP2B1     |
| 5.39E-89  | 0.399820798 | 0.239 | 0.019 | 1.01E-84  | 20 | NEIL1      |
| 9.02E-88  | 0.529047999 | 0.88  | 0.59  | 1.68E-83  | 20 | CYTIP      |
| 8.99E-86  | 0.545881694 | 0.655 | 0.312 | 1.68E-81  | 20 | MAP3K8     |
| 9.98E-85  | 0.306166465 | 0.2   | 0.01  | 1.86E-80  | 20 | SNX22      |
| 1.22E-83  | 0.352708348 | 0.227 | 0.018 | 2.27E-79  | 20 | ANKRD33B   |
| 2.52E-83  | 0.672598055 | 0.877 | 0.63  | 4.69E-79  | 20 | HERPUD1    |
| 3.39E-83  | 0.433981048 | 0.285 | 0.04  | 6.32E-79  | 20 | GPR65      |
| 3.86E-81  | 0.519446713 | 0.422 | 0.119 | 7.19E-77  | 20 | TMEM156    |
| 9.50E-80  | 0.318942105 | 0.175 | 0.002 | 1.77E-75  | 20 | PPP1R14A   |
| 1.02E-79  | 0.382662174 | 0.264 | 0.036 | 1.90E-75  | 20 | PIK3R5     |
| 3.75E-79  | 0.319283476 | 0.194 | 0.011 | 6.99E-75  | 20 | SSPN       |
| 4.58E-79  | 0.605278848 | 0.643 | 0.327 | 8.55E-75  | 20 | CD40       |
| 2.52E-78  | 0.456695913 | 0.342 | 0.079 | 4.69E-74  | 20 | ITM2C      |
| 1.08E-77  | 0.312333255 | 0.181 | 0.005 | 2.01E-73  | 20 | TEX9       |
| 1.88E-77  | 0.516660719 | 0.906 | 0.721 | 3.50E-73  | 20 | REL        |
| 2.70E-76  | 0.381583357 | 0.257 | 0.042 | 5.04E-72  | 20 | GRAMD1C    |
| 3.45E-76  | 0.555111007 | 0.302 | 0.062 | 6.43E-72  | 20 | RASSF6     |
| 4.79E-74  | 0.518565737 | 0.845 | 0.581 | 8.92E-70  | 20 | SNX2       |
| 1.03E-73  | 0.49351759  | 0.867 | 0.573 | 1.92E-69  | 20 | RPS4Y1     |
| 1.36E-73  | 0.363828295 | 0.33  | 0.084 | 2.53E-69  | 20 | HIP1R      |
| 2.04E-73  | 0.435250851 | 0.817 | 0.548 | 3.81E-69  | 20 | NFKBID     |
| 2.37E-72  | 0.416906422 | 0.334 | 0.083 | 4.41E-68  | 20 | ITGB2      |
| 5.20E-72  | 0.439581997 | 0.398 | 0.12  | 9.69E-68  | 20 | ARHGAP31   |
| 4.13E-71  | 0.37860395  | 0.179 | 0.008 | 7.69E-67  | 20 | TIAM2      |
| 6.61E-71  | 0.585795967 | 0.686 | 0.375 | 1.23E-66  | 20 | TRAF4      |
| 1.05E-70  | 0.413829629 | 0.82  | 0.505 | 1.96E-66  | 20 | BIRC3      |
| 1.49E-70  | 0.313914344 | 0.231 | 0.029 | 2.79E-66  | 20 | CMTM7      |
| 2.98E-69  | 0.450563155 | 0.484 | 0.184 | 5.55E-65  | 20 | LY86       |
| 5.58E-69  | 0.445957883 | 0.334 | 0.081 | 1.04E-64  | 20 | GRASP      |
| 1.30E-68  | 0.269824584 | 0.176 | 0.012 | 2.43E-64  | 20 | SMAGP      |
| 1.63E-68  | 0.292083901 | 0.192 | 0.01  | 3.04E-64  | 20 | C12orf75   |
| 1.52E-66  | 0.450250544 | 0.151 | 0.003 | 2.83E-62  | 20 | MAL        |
| 4.30E-66  | 0.383261995 | 0.894 | 0.665 | 8.01E-62  | 20 | CCR7       |
| 6.19E-66  | 0.598385078 | 0.522 | 0.239 | 1.15E-61  | 20 | TKT        |
| 1.61E-65  | 0.344337079 | 0.306 | 0.08  | 3.00E-61  | 20 | SNX11      |

|          |             |       |       |          |    |            |
|----------|-------------|-------|-------|----------|----|------------|
| 1.29E-64 | 0.401572883 | 0.559 | 0.281 | 2.41E-60 | 20 | ZFAND6     |
| 5.63E-64 | 0.351600618 | 0.284 | 0.055 | 1.05E-59 | 20 | SCPEP1     |
| 6.58E-64 | 0.271100213 | 0.184 | 0.016 | 1.23E-59 | 20 | DENND3     |
| 9.63E-64 | 0.407108722 | 0.706 | 0.441 | 1.80E-59 | 20 | BACH1      |
| 2.87E-63 | 0.420643623 | 0.893 | 0.682 | 5.35E-59 | 20 | RBM3       |
| 8.14E-63 | 0.253605323 | 0.143 | 0.003 | 1.52E-58 | 20 | AK8        |
| 6.09E-62 | 0.39827407  | 0.395 | 0.138 | 1.14E-57 | 20 | FAM49A     |
| 6.49E-62 | 0.478771525 | 0.647 | 0.367 | 1.21E-57 | 20 | ANXA6      |
| 1.21E-61 | 0.317045203 | 0.522 | 0.22  | 2.25E-57 | 20 | AC119396.1 |
| 3.24E-61 | 0.315778188 | 0.349 | 0.107 | 6.03E-57 | 20 | WDFY2      |
| 7.13E-59 | 0.392794499 | 0.369 | 0.116 | 1.33E-54 | 20 | ICAM1      |
| 3.31E-58 | 0.361825298 | 0.87  | 0.621 | 6.17E-54 | 20 | LRRFIP1    |
| 7.14E-58 | 0.382553399 | 0.432 | 0.175 | 1.33E-53 | 20 | MTMR6      |
| 4.92E-57 | 0.395958767 | 0.877 | 0.673 | 9.17E-53 | 20 | TAPBP      |
| 1.39E-56 | 0.374940398 | 0.847 | 0.624 | 2.59E-52 | 20 | EIF3E      |
| 6.23E-56 | 0.532483991 | 0.473 | 0.216 | 1.16E-51 | 20 | CPNE5      |
| 9.16E-56 | 0.421537439 | 0.953 | 0.811 | 1.71E-51 | 20 | ARHGDIB    |
| 1.52E-55 | 0.345596754 | 0.61  | 0.317 | 2.83E-51 | 20 | RASGEF1B   |
| 4.76E-55 | 0.44066115  | 0.644 | 0.351 | 8.86E-51 | 20 | NFKB2      |
| 6.64E-55 | 0.382448065 | 0.956 | 0.839 | 1.24E-50 | 20 | SLC25A6    |
| 1.13E-54 | 0.357756639 | 0.982 | 0.848 | 2.11E-50 | 20 | TOMM7      |
| 1.03E-53 | 0.376656293 | 0.362 | 0.125 | 1.92E-49 | 20 | C7orf50    |
| 5.65E-53 | 0.375882717 | 0.43  | 0.176 | 1.05E-48 | 20 | RFTN1      |
| 9.45E-53 | 0.371809507 | 0.577 | 0.293 | 1.76E-48 | 20 | PER1       |
| 1.62E-52 | 0.368505377 | 0.924 | 0.731 | 3.01E-48 | 20 | UQCRB      |
| 8.20E-52 | 0.474880239 | 0.969 | 0.833 | 1.53E-47 | 20 | PFN1       |
| 1.04E-50 | 0.453545003 | 0.393 | 0.161 | 1.94E-46 | 20 | SEMA7A     |
| 1.59E-50 | 0.589058102 | 0.493 | 0.249 | 2.96E-46 | 20 | PLEK       |
| 1.89E-49 | 0.448831955 | 0.219 | 0.05  | 3.52E-45 | 20 | SGK1       |
| 2.35E-49 | 0.319158196 | 0.369 | 0.142 | 4.38E-45 | 20 | RHBDF2     |
| 4.89E-49 | 0.251882221 | 0.186 | 0.033 | 9.12E-45 | 20 | IFNG-AS1   |
| 6.26E-49 | 0.357263089 | 0.681 | 0.441 | 1.17E-44 | 20 | ADGRE5     |
| 7.41E-48 | 0.317806969 | 0.474 | 0.22  | 1.38E-43 | 20 | CAMK1D     |
| 2.42E-47 | 0.297514133 | 0.262 | 0.084 | 4.50E-43 | 20 | NEK6       |
| 6.10E-47 | 0.376406762 | 0.367 | 0.152 | 1.14E-42 | 20 | KYNU       |
| 8.26E-47 | 0.377313684 | 0.331 | 0.131 | 1.54E-42 | 20 | MYO1C      |
| 1.74E-45 | 0.318333251 | 0.748 | 0.5   | 3.24E-41 | 20 | RAP1B      |
| 2.64E-45 | 0.326319625 | 0.564 | 0.302 | 4.92E-41 | 20 | RHOF       |
| 3.12E-44 | 0.312974281 | 0.98  | 0.853 | 5.82E-40 | 20 | RPL23      |
| 5.35E-44 | 0.344208608 | 0.383 | 0.168 | 9.98E-40 | 20 | LAT2       |
| 8.14E-44 | 0.38035849  | 0.316 | 0.124 | 1.52E-39 | 20 | ANXA4      |
| 9.93E-44 | 0.26313973  | 0.231 | 0.056 | 1.85E-39 | 20 | LPIN1      |
| 1.84E-43 | 0.325742077 | 0.613 | 0.362 | 3.43E-39 | 20 | SPIB       |
| 4.15E-43 | 0.258582451 | 0.869 | 0.638 | 7.74E-39 | 20 | CD44       |
| 1.35E-41 | 0.260609633 | 0.213 | 0.059 | 2.51E-37 | 20 | RASGRP1    |
| 3.47E-41 | 0.302001776 | 0.803 | 0.616 | 6.47E-37 | 20 | NAP1L1     |



|          |             |       |       |          |    |           |
|----------|-------------|-------|-------|----------|----|-----------|
| 9.01E-41 | 0.286013413 | 0.345 | 0.142 | 1.68E-36 | 20 | SAMSN1    |
| 4.42E-40 | 0.406799162 | 0.793 | 0.586 | 8.23E-36 | 20 | MYH9      |
| 5.85E-40 | 0.323197331 | 0.399 | 0.183 | 1.09E-35 | 20 | S1PR1     |
| 6.63E-40 | 0.306775708 | 0.416 | 0.206 | 1.24E-35 | 20 | EMB       |
| 7.62E-40 | 0.379946968 | 0.842 | 0.646 | 1.42E-35 | 20 | SUB1      |
| 1.74E-39 | 0.2577554   | 0.274 | 0.094 | 3.24E-35 | 20 | TP53INP1  |
| 2.36E-39 | 0.301353883 | 0.717 | 0.516 | 4.40E-35 | 20 | PTPN1     |
| 8.93E-39 | 0.330876857 | 0.457 | 0.23  | 1.67E-34 | 20 | DAPP1     |
| 4.43E-38 | 0.331788102 | 0.531 | 0.294 | 8.26E-34 | 20 | ARID5A    |
| 6.55E-38 | 0.260143893 | 0.182 | 0.048 | 1.22E-33 | 20 | GSN       |
| 9.72E-38 | 0.346504711 | 0.698 | 0.487 | 1.81E-33 | 20 | LCP1      |
| 1.09E-36 | 0.263336141 | 0.446 | 0.238 | 2.04E-32 | 20 | GLIPR1    |
| 1.63E-36 | 0.307069096 | 0.309 | 0.122 | 3.05E-32 | 20 | RARRES3   |
| 2.86E-36 | 0.29992384  | 0.954 | 0.788 | 5.33E-32 | 20 | PPDPF     |
| 8.89E-35 | 0.254181321 | 0.659 | 0.441 | 1.66E-30 | 20 | LDHB      |
| 4.91E-33 | 0.337798522 | 0.673 | 0.481 | 9.16E-29 | 20 | CAPZB     |
| 1.15E-32 | 0.289479229 | 0.533 | 0.331 | 2.14E-28 | 20 | SASH3     |
| 2.13E-32 | 0.28209751  | 0.274 | 0.12  | 3.96E-28 | 20 | CCDC167   |
| 2.75E-32 | 0.280846504 | 0.474 | 0.26  | 5.13E-28 | 20 | KDM2B     |
| 3.55E-31 | 0.274580412 | 0.39  | 0.208 | 6.61E-27 | 20 | PPA1      |
| 8.90E-31 | 0.264945258 | 0.975 | 0.854 | 1.66E-26 | 20 | BTF3      |
| 1.06E-30 | 0.251016699 | 0.358 | 0.173 | 1.97E-26 | 20 | GPR132    |
| 1.37E-30 | 0.2886047   | 0.768 | 0.564 | 2.55E-26 | 20 | DDX21     |
| 3.70E-30 | 0.253909375 | 0.251 | 0.108 | 6.89E-26 | 20 | HIPK2     |
| 4.90E-30 | 0.267160547 | 0.728 | 0.518 | 9.13E-26 | 20 | PGK1      |
| 1.59E-28 | 0.254389193 | 0.352 | 0.179 | 2.97E-24 | 20 | NFKB1     |
| 1.92E-28 | 0.411738852 | 0.576 | 0.408 | 3.57E-24 | 20 | GSTK1     |
| 2.68E-28 | 0.272110523 | 0.458 | 0.248 | 4.99E-24 | 20 | TMBIM1    |
| 3.77E-28 | 0.298880605 | 0.708 | 0.511 | 7.02E-24 | 20 | MAPK1IP1L |
| 1.00E-27 | 0.259707011 | 0.853 | 0.661 | 1.86E-23 | 20 | EIF5A     |
| 9.39E-27 | 0.250077424 | 0.93  | 0.76  | 1.75E-22 | 20 | SYNGR2    |
| 3.44E-25 | 0.267868284 | 0.838 | 0.688 | 6.42E-21 | 20 | YWHAB     |
| 1.32E-24 | 0.271085043 | 0.663 | 0.482 | 2.46E-20 | 20 | RSL1D1    |
| 1.22E-21 | 0.250619931 | 0.474 | 0.307 | 2.28E-17 | 20 | COX17     |
| 2.24E-21 | 0.261776341 | 0.881 | 0.732 | 4.17E-17 | 20 | CORO1A    |
| 8.15E-19 | 0.366175784 | 0.217 | 0.097 | 1.52E-14 | 20 | CD70      |
| 1.66E-16 | 0.357368263 | 0.222 | 0.112 | 3.09E-12 | 20 | MYC       |
| 2.88E-13 | 0.310566771 | 0.306 | 0.183 | 5.37E-09 | 20 | TRAF1     |

**Supplementary Table 2. Probes for rapid capture hybridization sequencing (RaCH-seq).** Probe panel was designed to target the exons of the BCL2 family members. The xGen Lockdown Probes were individually synthesized 5'-biotinylated oligos.

| ID             | Sequence                                                                                                                     |
|----------------|------------------------------------------------------------------------------------------------------------------------------|
| BAD-201_exon1  | CGGCAGGCCCGGGTCAGGGGCTCGAGATCGGGCTTGGGCCAGAGCATGTTCCAGATCCAGAGTTTGGCCGAGTGAGCAGGAAGACTCCAGCTCTGCAGAGAGGGGCTGGGCCCA           |
| BAD-201_exon2  | CCCAGAGCATGTTCCAGATCCAGAGTTTGGAGCCGAGTGAGCAGGAAGACTCCAGCTCTGCAGAGAGGGGCTGGGCCAGCCCGCAGGGGACGGGCCCTCAGGCTCCGGCAAGCATC         |
| BAD-201_exon4  | GGCGGAAGTACTTCCCTCAGGCCTATGCAAAAAGAGGATCCGTGTCTCCTTTGGAGGGAGGGGTGACCCAGATTCCCTTCCGGTGCCTGTGAAGCCACGGAAGGCTTGGTCCATCG         |
| BAD-202_exon1  | GGGGCTCGAGATCGGGCTTGGGCCAGAGCATGTTCCAGATCCAGAGTTTGGAGCCGAGTGAGCAGGAAGACTCCAGCTCTGCAGAGAGGGGCTGGGCCAGCCCGCAGGGGACGG           |
| BAD-202_exon3  | GGAGAATTCGATTCTCCTTCTTGGGAATCTGAGGACTCTGAAAATCCAGTGCAGGGATGCTCGCGGAAGCATCAGCAGGGATGTCGCCAGCCGCTGACTCAGAAGCCAAACAG            |
| BAD-202_exon5  | CTCCGGAGGATGAGTGACGAGTTTGTGGACTCCTTTAAGAAGGGACTTCTCGCCCGAAGAGCGCGGGCACAGCAACGCAGATGCGGC AAAGTCCAGCTGGACGCGAGTCTTCCAGTCC      |
| BAD-203_exon1  | AGCTGTGCCTTGACTACGTAACATCTTGTCTCACAGCCAGAGCATGTTCCAGATCCAGAGTTTGGAGCCGAGTGAGCAGGAAGACTCCAGCTCTGCAGAGAGGGGCTGGGCCAGC          |
| BAD-203_exon2  | GGGGAGGAGCCAGCCCTTTCGGGGCCGCTCGGCTCGGGCCGCCCCAACCTCTGGGCAGCACAGCGCTATGGCCGCGAGCTCCGGAGGATGAGTGACGAGTTTGTGGACTCCTTTAAG        |
| BAD-203_exon3  | CGGAAGTACTTCCCTCAGGCCTATGCAAAAAGAGGATCCGTGTCTCCTTTGGAGGGAGGGGTGACCCAGATTCCCTTCCGGTGCCTGTGAAGCCACGGAAGGCTTGGTCCATCGGA         |
| BAD-204_exon1  | GGACACAGGCTAAGAGAGTCGAAGGCTGGCTAGAC AAGGGGAGAGACACAGAGCTCCGCTGATC ATACTGGACTCTGGATTCCACAAACCTTTGGAACCTTCCAGCTCAGGCCTCCA      |
| BAD-204_exon3  | TCGCGCTCGGCGCCCCAACCTCTGGGCAGCACAGCGCTATGGCCGCGAGCTCCGGAGGATGAGTGACGAGTTTGTGGACTCCTTTAAGAAGGGACTTCTCGCCGAAGAGCGCGGGC         |
| BAD-205_exon1  | GGCAGGGCCAGGGGCTTAGAGGAGCTGAGATTAACGTGCGCCCCCTACCCACTGACCCTCTGCAGGCGCTGGGGCTGTGGAGATCCGGAGTGCACAGCTCCTACCCCGGGGACGGA         |
| BAD-205_exon2  | CTATGGCCGCGAGCTCCGGAGGATGAGTGACGAGTTTGTGGACTCCTTTAAGAAGGGACTTCTCGCCGAAGAGCGCGGGCACAGCAACGCAGATGCGGCAAGCTCCAGCTGGACGCG        |
| BAD-206_exon1  | AACTAGGGCCCGGAGCCCGGGTGTGGAGGGAGGCGGAGGCCCGGGTCAAGGGGCTCGAGATCGGGCTTGGGCCAGAGCATGTTCCAGATCCAGAGTTTGGCCGAGTGAGCAGGA           |
| BAD-207_exon1  | CATGTTCCAGATCCAGAGTTTGGAGCCGAGTGAGCAGGAAGACTCCAGCTCTGCAGAGAGGGGCTGGGCCAGCCCGCAGGGGACGGGCCCTCAGGCTCCGGCAAGCATCATCGCCA         |
| BAD-207_exon2  | ATGCAAAAAGAGGATCCGTGTCTCCTTTGGAGGGAGGGGTGACCCAGATTCCCTTCCGGTGCCTGTGAAGCCACGGAAGGCTTGGTCCATCGGAAGTTTGGGTTTTCCGCCACA           |
| BAK1-201_exon1 | TGATCACTGGAGTCTCGCGGGTCCCTCGGGTGCACAGGGACAAGTAAAGGCTACATCCAGATGCCGGGAATGCAGTACGCCATTCTGGAAAATGGGCTCCCACTCAGCCCTGGGA          |
| BAK1-201_exon2 | TTGGGCCAGGATCCCGGAGGCTGATCCGTCTCCACTTGAGACTTGA AAAATGGCTTCCGGGCAAGGCCAGTCTCCAGCAGGAGTGCAGGAGCTGCCCTGCCCTGCTTCT               |
| BAK1-201_exon2 | GCTGATCCCGTCTCCACTGAGACTGAAAATGGCTTCCGGGCAAGGCCAGTCTCCAGCAGGAGGCTGCCAGGAGCTGCCCTGCCCTGCTTCTGAGGAGCAGGTAAGCTCAGGA             |
| BAK1-201_exon3 | GGCCAGGCTCTCCAGGCAGGAGTGCAGGAGCTGCCCTGCCCTGCTTCTGAGGAGCAGGTAGCCAGGACACAGAGGAGTTTCCGAGCTACGTTTTTTACCGCCATCAGCAG               |
| BAK1-201_exon3 | AGGAGCAGGTAGCCAGGACACAGAGGAGTTTCCGAGCTACGTTTTTTACCGCCATCAGCAGAACCTAGCAGCACCATGGGGCAGGTGGGACGGCAGCTGCCATCATCGGGGACG           |
| BAK1-201_exon4 | TCCCAGGCAGGAGTGCAGGAGCCTGCCCTGCCCTGCTTCTGAGGAGCAGGTAGCCAGGACACAGAGGAGTTTCCGAGCTACGTTTTTTACCGCCATCAGCAGAACCTAGCAG             |
| BAK1-201_exon4 | CAACCTAGCAGCACCATGGGGCAGGTGGGACGGCAGCTCGCCATCATCGGGGACGACATCAACCGACGCTATGACTCAGAGTTCCAGACCATGTTGCAGCACCTGCAGCCACGGCAGAG      |
| BAK1-201_exon5 | GCTCGCCATCATCGGGGACGACATCAACCGACGCTATGACTCAGAGTTCCAGACCATGTTGCAGCACCTGCAGCCACGGCAGAGAATGCCTATGAGTACTTACCAAGATTGCCACCAG       |
| BAK1-201_exon6 | CCTGTTTGGAGTGGCATCAATTTGGGGCCGTGTGGTGGCTTCTTGGGCTCGGCTACCGTCTGGCCCTACACGCTTACCAGCATGGCTGACTGGCTTCTAGGCCAGGTGACCCGCTT         |
| BAK1-201_exon7 | GGTGCCTTTGGGGTCCCGTTACAGACCCTGCCTGGACTTAAAGCAAGTCTTTGCCTTCTGTTCCCTTGCAGGGGTCCCCCTCAAGAGTACAGAAGCTTTAGCAAGTGTGACTCC           |
| BAK1-201_exon7 | TGTGAATACTGAACTCTGTTCCCCACCCTCATGCTCCTACACTGTCTAGTCTCCTCAGGGTGGGGGTGACAGTGCCTTCTTATTGGGCACAGCCTAGGGTCTTGGGGTCAAGG            |
| BAK1-202_exon1 | ACAGAGCAACTTCCCTAGAGGGAGCTGATTGGAGCCGGGTGCCGCTGGCACCTATGATCACTGGAGTCTCGCGGGTCCCCTCGGGCTGCACAGGGACAAGTAAAGGCTACATCCAGAT       |
| BAK1-202_exon6 | GGGTGCCCTTTGGGGTCCCGGTTACAGACCCCTGCCTGGACTTAAAGCAAGTCTTTGCCCTCTGTTCCCTTGCAGGGGTCCCCCTCAAGAGTACAGAAGCTTTAGCAAGTGTGACTC        |
| BAK1-202_exon6 | ATTCTGGAAGATCAGCACCTAAGAGATGGGACTAGGACTGAGCCTGGTCTGGCCGTCCTAAGCATGTGTCCCAGGAGCAGGACTACTAGGAGAGGGGGCCAAAGGCTCTGCTCAA          |
| BAK1-203_exon3 | GGACACAGAGGAGGTTTTCCGAGCTACGTTTTTTACCGCCATCAGCAGGAACAGGAGGCTGAAGGGTGGCTGCCCTGCCGACCCAGAGATGGTCACTTACCTTGC AACCTAGCAG         |
| BAK1-203_exon5 | ACATCAACCGACGCTATGACTCAGAGTTCCAGACCATGTTGCAGCACCTGCAGCCACGGCAGAGAATGCCTATGAGTACTTACCAAGATTGCCACCAGGCCAGCAGCAACCCACAG         |
| BAK1-203_exon5 | GCCAGCAGCAACACCCACAGCCTGTTTGGAGTGGCATCAATTTGGGGCCGTGTGGTGGCTTCTTGGGCTTCCGGCTACCGTCTGGCCCTACACGCTTACCAGCATGGCTGACTGGCTTC      |
| BAX-201_exon5  | GCCCTGTGCACCAAGGTGCCGAATGATCAGAACCATCATGGGCTGGACATTGGACTTCTCCGGGAGCGGCTGTTGGGCTGGATCCAAGACCAGGGTGGTTGGGTGAGACTCCTCAAG        |
| BAX-202_exon1  | CGCTGCGGCCCGCCGCGGACCCGGCGAGAGGCGGCGGGAGCGGCGGTGATGGACGGTCCGGGAGCAGCCAGAGGCGGGGGGCCAGCCAGAGCTGGGGGCCAACAGCTCTGAGCAGATCAAGACA |
| BAX-202_exon2  | GACCCGGCAGAGGCGCGGAGCGGGAGCTGATGGACGGTCCGGGAGCAGCCAGAGGCGGGGGGCCACACAGCTCTGAGCAGATCATGAAGACAGAGGGGCCCTTTGCTTCAAGG            |
| BAX-202_exon2  | GGCCACCAGCTCTGAGCAGATCATGAAGACAGGGCCCTTTTGTTCAGGGTTCATCAGGATCAGCAGGGCGAATGGGGGGGAGGCACCCGAGCTGGCCCTGGACCCGGTGCCTC            |
| BAX-202_exon6  | CTACTACCATCTGGAAGAAGATGGGCTGAGGCCCCAGCTGCCTGGACTGTGTTTTTCTCCATAAATATGGCATTTTTCTGGGAGGGGTGGGGATTGGGGACGTGGGCATTTTT            |
| BAX-203_exon1  | ATGGACGGTCCGGGAGCAGCCAGAGGCGGGGGCCACCAGCTCTGAGCAGATCATGAAGACAGGGGCCCTTTTGTTCAGGGGATGATTGCCGCGTGGACACAGACTCCCCCGA             |

|                |                                                                                                                          |
|----------------|--------------------------------------------------------------------------------------------------------------------------|
| BAX-203_exon2  | GGCCACCAGCTCTGAGCAGATCATGAAGACAGGGGCCCTTTTGCTTCAGGGGATGATTGCCGCCGTGGACACAGACTCCCCCGAGAGGTCTTTTCCGAGTGGCAGCTGACATGTTTT    |
| BAX-203_exon5  | ACCAGGTGGTTGGGACGGCCTCCTCTCTACTTTGGGACGCCACGTGGCAGACCCTGACCATCTTTGTGGCGGGAGTGTCAACCGCTCACTACCATCTGGAAGAAGATGGGCTGAG      |
| BAX-204_exon1  | ATGGACGGGTCCGGGAGCAGCCCAGAGGGCGGGGGCCACCAGCTTGAGCAGATCATGAAGACAGGGGCCCTTTTGCTTCAGGGTTTCATCCAGGATCGAGCAGGGCGAATGGGGGGG    |
| BAX-204_exon5  | TGCCAGCAAATGGTGTCAAGGCTGGCTGAAATGGCGTGATCTGGCTCACTGCAACCTGCTCCCTGGGTTCAAGCGATTACCTGCCATCCCAAGGAGCTGGGATTACAG             |
| BAX-204_exon5  | GCTGGCGTAAATGGCGTGATCTGGGCTACTGCAACCTGCTCCCTGGGTTCAAGCGATTACCTGCCATCCCAAGGAGCTGGGATTACAGGCCCTGTGCACCAAGGTGGCGG           |
| BAX-204_exon6  | GAGTGGGATTACAGGCCCTGTGTCACCAAGGTGCCGAACCTGATCAGAACCATCATGGGCTGGACATTGGACTTCCTCCGGGAGCGGCTGTGGGCTGGATCCAAGACCAGGGTGGTTGG  |
| BAX-204_exon7  | GACCAGGGTGGTTGGGACGGCCTCCTCTCTACTTTGGGACGCCACGTGGCAGACCCTGACCATCTTTGTGGCGGGAGTGTCAACCGCTCACTACCATCTGGAAGAAGATGGGCTGA     |
| BAX-205_exon1  | ATGGACGGGTCCGGGAGCAGCCCAGAGGGCGGGGTTTTCATCCAGGATCGAGCAGGGCGAATGGGGGGAGGCACCCGAGCTGGCCCTGGACCCGGTGCCTCAGGATGCGTCCACCAAG   |
| BAX-205_exon2  | TTTCATCCAGGATCGAGCAGGGCGAATGGGGGGAGGCACCCGAGCTGGCCCTGGACCCGGTGCCTCAGGATGCGTCCACCAAGAAGCTGAGCGAGTGTCTCAAGCGCATCGGGGACGAA  |
| BAX-205_exon3  | TGGGGGGAGGCACCCGAGCTGGCCCTGGACCCGGTGCCTCAGGATGCGTCCACCAAGAAGCTGAGCGAGTGTCTCAAGCGCATCGGGGACGAACCTGGACAGTAACATGGAGCTGCAGAG |
| BAX-205_exon3  | GGGGGGAGGCACCCGAGCTGGCCCTGGACCCGGTGCCTCAGGATGCGTCCACCAAGAAGCTGAGCGAGTGTCTCAAGCGCATCGGGGACGAACCTGGACAGTAACATGGAGCTGCAGAGG |
| BAX-205_exon6  | GCCTCACTACCATCTGGAAGAAGATGGGCTGAGGCCCCAGCTGCCTGGACTGTGTTTTCTCCATAAAATTATGGCATTITTTCTGGGAGGGTGGGGATTGGGGACGTGGGCATTT      |
| BAX-206_exon5  | GCCCTGTGCACCAAGGTGCCGGAACCTGATCAGAACCATATGGGCTGGACATTGGACTTCCTCCGGGAGCGGCTGTGGGCTGGATCCAAGACCAGGGTGGTGGACCGTACCATCTTT    |
| BAX-206_exon6  | TTGGACTTCCTCCGGGAGCGGCTGTGGGCTGGATCCAAGACCAGGGTGGTGGACCGTACCATCTTTGTGGCGGGAGTGTCAACCGCTCACTACCATCTGGAAGAAGATGGGCTGA      |
| BAX-207_exon1  | CTCCACAGTCTCCTGATCCCTAGAACCCAAGAGTCCAGGTACCTCTTCCCTTCTCTCTAGGGGCCACCAGCTCTGAGCAGATCATGAAGACAGGGGCCCTTTTGCTTCAGGG         |
| BAX-207_exon2  | TTTCATCCAGGATCGAGCAGGGCGAATGGGGGGAGGCACCCGAGCTGGCCCTGGACCCGGTGCCTCAGGATGCGTCCACCAAGAAGCTGAGCGAGTGTCTCAAGCGCATCGGGGACGA   |
| BAX-207_exon3  | GATGATTGCCCGCTGGACACAGACTCCCCCGAGAGGTCTTTTCCGAGTGGCAGCTGACATGTTTTCTGACGGCAACTCAACTGGGGCCGGGTTGTCGCCCTTTTCTACTTTGCCAG     |
| BAX-207_exon4  | CAAACGGTGTCAAGGCCCTGTGCACCAAGGTGCCGGAACCTGATCAGAACCATCATGGGCTGGACATTGGACTTCCTCCGGGAGCGGCTGTGGGCTGGATCCAAGACCAGGGTGGTTG   |
| BAX-207_exon4  | GCCCTGTGCACCAAGGTGCCGGAACCTGATCAGAACCATCATGGGCTGGACATTGGACTTCCTCCGGGAGCGGCTGTGGGCTGGATCCAAGACCAGGGTGGTGGGACGGCCTCCTCTCC  |
| BAX-207_exon5  | TGTGGCGGGAGTGTCAACCGCTCACTACCATCTGGAAGAAGATGGGCTGAGGCCCCAGCTGCCTGGACTGTGTTTTCTCCATAAAATTATGGCATTITTTCTGGGAGGGTGGGGA      |
| BAX-208_exon1  | GTCTGATTATTGTGGACAGATTTGAGGAGTGACACCCGTTCTGATTCACCTCACTCCACTTAGTTTCATCCAGGATCGAGCAGGGCGAATGGGGGGGAGGCACCCG               |
| BAX-208_exon3  | TTCCGAGTGGCAGCTGACATGTTTTCTGACGGCAACTCAACTGGGCGGGTGTGCCCTTTTCTACTTTGCCAGAAACTGGTGTCAAGGCCCTGTGCACCAAGGCGCCGGAACCT        |
| BAX-209_exon4  | CAGGGTGGTTGGGACGGCCTCCTCTCTACTTTGGGACGCCACGTGGCAGACCGTACCATCTTTGTGGCGGGAGTGTCAACCGCTCACTACCATCTGGAAGAAGATGGGCTGAGGC      |
| BAX-210_exon1  | CAGAAGTCCAGCCTAGGGCTCCTCAGGACACAGGACTCTCAGCCCCGATTCTCCTCTCCCTAAGAAGTGGAGTCTGGGCCCCACAACCTCAGCGCAAACATCCGGACTCCCAGC       |
| BAX-210_exon2  | CCGCCACTCCTCTGGGACCTGGGCCTTCTGGAGCAGGTACAGTGGTGCCTCTCCCATCTTCAGATCATCAGATGTGGTCTATAATGCGTTTTCTTACGTGTCTGATCAATCCCCG      |
| BAX-211_exon1  | CCCGGCGAGAGCGGCGGGGAGCGGGTGTGGACGGGTCCGGGAGCAGCCCAGAGGGCGGGGGCCACCAGCTCTGAGCAGATCATGAAGACAGGGGCCCTTTTGCTTCAGGGGT         |
| BAX-211_exon2  | ATTTGAGGAGTGACACCCGTTCTGATTCTGCACCCTCACTCCATCCCACTCTAGTTTCATCCAGGATCGAGCAGGGCGAATGGGGGGGAGGCACCCGAGCTGGCCCTGGACCCGGTG    |
| BAX-211_exon5  | AGTGTCAACCGCTCACTACCATCTGGAAGAAGATGGGCTGAGGCCCCAGCTGCCTGGACTGTGTTTTCTCCATAAAATTATGGCATTITTTCTGGGAGGGTGGGGATTGGGGGAC      |
| BAX-212_exon1  | ATGGACGGGTCCGGGAGCAGCCCAGAGCGGGGTTTCATCCAGGATCGAGCAGGGCGAATGGGGGGGAGGCACCCGAGCTGGCCCTGGACCCGGTGCCTCAGGATGCGTCCACCAAGA    |
| BAX-212_exon3  | GGATGATTGCCCGCTGGACACAGACTCCCCCGAGAGGTCTTTTTCCGAGTGGCAGCTGACATGTTTTCTGACGGCAACTCAACTGGGGCCGGGTTGTCGCCCTTTTCTACTTTGCCA    |
| BAX-213_exon1  | ATGGACGGGTCCGGGAGCAGCCCAGAGCGGGGATGATTGCCCGCTGGACACAGACTCCCCCGAGAGGCTTTTTCCGAGTGGCAGCTGACATGTTTTCTGACGGCAACTCAACT        |
| BAX-213_exon3  | TCCCTGCCCCCGCCACTCCTCTGGGACCTGGGCCTTCTGGAGCAGGTACAGTGGTGCCTCTCCCATCTTCAGATCATCAGATGTGGTCTATAATGCGTTTTCTTACGTGTCTGA       |
| BBC3-203_exon1 | ACGCGGACGCGCCTGCGGCCCGGGAGCAGCAGCAGCCACAGCCACAGCAGCCGCCACTGCAGTTAGAGCGGCAGCAGCAGCGACGCCACAGCAGCAGCCGCCGCGGAGAGCGGCCTC    |
| BBC3-204_exon1 | AAAAGAAACGGAATGGAAGCTATGAGACAGGATGAAATTTGGCATGGGGTCTGCCAGGCATGTCCATGCCAGGTGCCAGGGTGTCCACGACGTGGGTCCCTGCCAGATTTGTG        |
| BBC3-204_exon2 | CCCTTCCCGCTCGGCCGCCCTGGTGCCCTGGCAGTGTCTGCGGCCCTTGCAGCCCGGCCCTGGCTGCCGCCCCCGCCGCCCCACCTGCTGCCCGTGCCTACCTTGCGCCCCACC       |
| BBC3-204_exon3 | GCGGGCGGTCCACCCAGGCGGCCCGGGAGTCCGCGGGGAGGAGGAACAGTGGGCCCGGGAGATCGGGGCCAGCTGCGGGGATGGCGGACGACCTAACGCACAGTACGAGCGGGG       |
| BBC3-204_exon4 | AGACAAGAGGAGCAGCAGCGGCCCGCCCTCACCTGGAGGGTCTGTACAATCTCATATGGGACTCCTGCCCTTACCCAGGGGCCACAGAGCCCGGAGATGGAGCCCAATTAGGTG       |
| BBC3-204_exon4 | TGCCCGTGACCGCCCCCGCCCATCAATCCATTGCATAGGTTTAGAGAGAGCAGTGTGACCACCTGGCATTCAATTTGGGGGTGGGAGATTTGGCTGAAGCCGCCAGCCTTAGTCT      |
| BBC3-205_exon1 | GCCTGTACATGGAAGAGCAAAATGTGGCCCTTTGGAAATAGAGGTCGTTAAGCCTGACCACCCCGGGGTCACTCTTGCCGCTTACCTTCCACACTGACAAGGGCCGTGGGA          |
| BBC3-206_exon1 | GGTCTTAGAGACCACCTGTTTTCTATCTGCCACTGGAGAGGGGGCAGGGGTTTACTCGCGTGGCTAGAGGTGCTTGTGTAAGCCTTGCAATGGGGGGGGCTTCCAGTTCT           |
| BBC3-206_exon1 | TGAATCTGTGCTCTGCCGTGACCGCCCGCCCATCAATCCATTGCATAGGTTTAGAGAGAGCAGTGTGACCAGTGGCATTCAATTTGGGGGTGGGAGATTTGGCTGAAGCCG          |
| BCL2-201_exon1 | ACCCCTCGCCGACACACAGCGCGGGCTTCTAGCGCTCGGCACCGCGGGCCAGGCGCTCTGCCTTCAATTTATCCAGCAGCTTTTCGGAATGCATTTGCTGTTCCGAGTTTAA         |
| BCL2-201_exon2 | GGGTCATGTGTGGAGAGCGTCAACCGGAGATGTCGCCCTGGTGGACAACATCGCCCTGTGGATGACTGAGTACCTGAACCGGCACCTGCACACCTGGATCCAGGATAACGGAGGCT     |

|                   |                                                                                                                            |
|-------------------|----------------------------------------------------------------------------------------------------------------------------|
| BCL2-201_exon3    | GATGCCTTTGTGGAAGTGTACGGCCCCAGCATGCGGCCCTGTGTTGATTTCTCCCTGGCTGTCTCTGAAGACTCTGCCTCAGTTGGCCCTGGTGGGAGCTTGCATCACCCCTGGGTGCCTAT |
| BCL2-201_exon3    | CCAGGGATGATCAACAGGGCAGTGTGGTCTCCGAATGTCTGGAAGCTGATGGAGCTCAGAATTCACCTGTCAAGAAAGAGCAGTAGAGGGGTGGCTGGGCCCTGCACCCCTGGGGCCCT    |
| BCL2-201_exon3    | ATGGTGGTTTGACCTTTAGACAGTGTCTTACAGTGGCCCTGTTTCAACACAGACCCACCCAGAGCCCTCCCTGCCCTCTCCCGGGGGCTTTCTCATGGCTGTCCCTCAGGGTCTTCCTG    |
| BCL2-201_exon3    | TGAAATGCAGTGGTGTACCTCCACCAAGAAAGCAGAAACCTGTGGTATGAAGCCAGACTCCCGGGCGGCCCTCAGGAAACAGAATGATCAGACCTTTGAATGATTTAATTTTA          |
| BCL2-201_exon3    | CTGAGAACCTCCTCGGCCCTCCAGTCCCTCGCTGCACAAATACTCCGCAAGAGAGGGCCAGAATGACAGCTGACAGGGTCTATGGCCATCGGGTCTGCTCCGAAGATTTGGCAGGGCCAG   |
| BCL2-201_exon3    | CCTGTATTGGGGTCGATGTGATGCCCTGCGAAGAACCCTGTGTGACAAATGAGAAACATTTTGAAGTTTGTGGTACGACCTTTAGATTCCAGAGACATCAGCATGGCTCAAAGTGCAGC    |
| BCL2-202_exon1    | AAAATGCATTTGCTGTTCCGAGTTAATCAGAAGAGGATTCTGCCTCCGTCGCCGGCTCTTCACTGTCCTCCCTCTCCCTGTCTCTCTCTGGGAGGGCGTGAAGCGTCCCGTGGATA       |
| BCL2-202_exon1    | GTGGATAGAGATTATGCCTGTGCCCGCGCTGTGTGCGCGCTGTAATTTGCCGAGAAGGGGAAAACATCACAGGACTTCTGCGAATACCGGACTGAAAATTGTAATTCATCTGCCGCC      |
| BCL2-202_exon1    | CCAATAAAATAGCTGGATTATACTCCTCTTCTTCTCTGGGGCCCGTGGGGTGGGAGCTGGGGCAGAGGTGCGTGGCCCGTGGCTTTCTCTGGGAAGGATGGCGCACCGTGG            |
| BCL2-203_exon1    | CCTTGAGTTCGGTGGGGTCATGTGTGGAGAGCGTCAACCAGGAGATGTCGCCCTGGTGGACAACATCGCCCTGTGGATGACTGAGTACCTGAACCGGCACCTGCACACCTGGATCCA      |
| BCL2-203_exon1    | TGAGCAGCTTGTGGAACCGGAGGGAGGTTTACAGGACTGCTTATGAACCAGATACCAGGTTGGGTCTTGACAGTCTGCATCCAAACAAGCTCCCTGAAAACAAGCCCGTTGTACACTA     |
| BCL2-203_exon1    | ATCTTTGAAAAACAGGATGCAATTCAGTGTCTCTTTTATAGCCTCTTGGGAGAATGACTAATGTCAATTTTATAGGACCTAACAGGAGCAAAAAGCCTAGAAATTAATGCAAGTGGGA     |
| BCL2-203_exon1    | CTGCACTGTCCCGAGGGCTCCGTTGATTAGCCATCTCTGAATACTACACTGAATACTCCAGGCTTGTAGACTGCAAGTCAATTTTCTTTTCTTTGCTGCTGCTCGTAGAAAATTGGAACC   |
| BCL2-203_exon1    | ATGTGGATACCTTGTCTGCTCAGTGTGGCTTATAGACAGTAGACACATGCATCCCCCGGAGCTTTGTAGAGATGCTAAAGCTCAGCTCCCAACCCAGAGCTACTGAGTCAGAAATGTGGTT  |
| BCL2-203_exon1    | CAGGTGATGGAGAGTGACCCCTAAACTGGGAAGTGTGACGACATTCAGTTCATGTCTTAGGAGAGAGTGAATAGGAGCCACTAGAAGAATGAGATGATTCAGACAAGAGATTGTAGG      |
| BCL2-204_exon1    | AGAGTGGTTGGCTTACACATGGAGGATGCCCTTGTGGAAGTGTACGGCCCCAGCATGCGGCCCTGTGTTGATTCTCTCTGGCTGTCTCTGAAGACTCTGCTCAGTTGGCCCTGGTGGGA    |
| BCL2A1-201_exon1  | AGTGAGCATTCTCAGCACATTGCCTCAACAGCTTCAAGGTGAGCCAGCTCAAGACTTTGCTCTCCACCAGGCAGAAGATGACAGACTGTGAATTTGGATATATTTACAGGCTGGCTCAGG   |
| BCL2A1-202_exon1  | ACAGCTCAAGGTGAGCCAGCTCAAGACTTTGCTCTCCACCAGGCAGAAGATGACAGACTGTGAATTTGGATATATTTACAGGCTGGCTCAGGACTATCTGCAGTGCCTCTACAGATAC     |
| BCL2A1-202_exon2  | ATTTTGTGCGGAGTTATAATGAATAACACAGGAGAATGGATAAGGCAAAAACGGAGGCTGGGGGAAATGGCAACAATCACACACCTATGCTGGTAGAGTCAAGTGGCCACAGAAGAG      |
| BCL2A1-202_exon2  | GGGAAATGGCAACAATCACACACCTATGCTGGTAGAGTCAAGTGGCCACAAGAAGAGGAAAATGGCTTTGTAAGAAGTTTGAACCTAAATCTGGCTGGATGACTTTTCTAGAAGTTACAG   |
| BCL2A1-202_exon3  | GAAAATGGCTTTGTAAGAAGTTTGAAGCTAAATCTGGCTGGATGACTTTTCTAGAAGTTACAGGAAAGTCTGTGAAATGCTATCTCTCTGAAGCAACTGTTGACCAGAAAGGACA        |
| BCL2L1-201_exon2  | CAGTGTGCGTGGAAAGCGTAGACAAGGAGATGCAAGTATTGGTGTGAGTGGATCGGACTTACCTGAAAGTACCACCTAGAGCCCTGGATCCAGGAGAACGGCCGGCTGG              |
| BCL2L1-201_exon3  | CTCACTTTCAGTCGAAATGACCAGACTGACCATCCACTCTACCCTCCCAACCCCTTCTCTGCTCCACCACATCTCCTCCGTCAGCCGCCATTGCCACCAGGAGAACCCTACATGCA       |
| BCL2L1-201_exon3  | CCCAGAGCTGTTTATGGCCTCAGCTGCCCTCACTTCTACAAGAGCAGCCTGTGGCATCTTTGCCTTGGGCTGCTCTCATGTTGGTTCAGGGGACTCAGCCCTGAGGTGAAAGGGAGCT     |
| BCL2L1-202_exon1  | GCCACCGCAGGCGGGCTGAGTTACCGGCATCCCCGACCCACTCTCTCCGACTGTGATACAAAAGATCTTCCGGGGCTGCACCTGCCTGCCCTTGGCTAAGCGGATTTGAAT            |
| BCL2L1-202_exon2  | AGTAAAGCAAGCGCTGAGGGAGGCAGGCGACGAGTTGAACTGCGGTACCAGGCGGCATTGAGTACCTGACATCCAGCTCCACATCACCCAGGGACAGCATACAGAGCTTTGAACA        |
| BCL2L1-203_exon1  | GGAGTGGGGCGGGGGGACTGCCAGGGAGTGACTTCCGAGGAAGGCATTCCGAGAAGACGGGGGTAGAAAAGGCTGGTGGGAGATTAGAGTCCACTGGTCTTTCGATTGACTTA          |
| BCL2L1-203_exon2  | TCACTTTCAGTCGGAATGACCAGACTGACCATCCACTCTACCCTCCCAACCCCTTCTCTGCTCCACCACATCTCCTCCGTCAGCCGCCATTGCCACCAGGAGAACCCTACATGCAG       |
| BCL2L1-203_exon2  | TGTTTATGGCCTCAGTGCCTCACTTCTACAAGAGCAGCCTGTGGCATCTTTGCCTTGGGCTGCTCTCATGGTGGGTTACAGGGACTCAGCCCTGAGGTGAAAGGGAGCTATCAGGAA      |
| BCL2L1-204_exon1  | CTTTGCGTCTCGGGCTCGCGCGCTTGCAGCGGACCCGAAAGTGAAGTACTGAGCTTCAAGTCCCTGCTCTTACAGGGAAACTGAGGCTCAGGCGGGCTTGTTCGGGAGAGCCGCGAGCAGTC |
| BCL2L1-205_exon1  | CAGCCACCGCAGGCGGGCTGAGTTACCAGGCATCCCCGACGCCACTCTCTCCCGACTGTGATACAAAAGATCTTCCGGGGCTGCACCTGCCTTTGCCTAAGCGGATTGAA             |
| BCL2L1-206_exon1  | TTTCGGAGAAGACGGGGGTAGAAAAGGCTGGTGGGAGATTAGAGTCCACTGGTGTCTTCGATTTGACTTAAAGTGAAGTATCTTGAACCTAGACCCAGACCTTCTCTTCTCTCCCTT      |
| BCL2L1-206_exon2  | GGTTGACTTTCTCTCTACAAGCTTTCCAGAAAAGGATACAGCTGGAGTCAAGTTAGTGTGTTGGAAGAGAAGAGGACTGAGGCCCCAGAAAGGACTGAATCGGAGATGGAGACCCCCAG    |
| BCL2L1-207_exon2  | GCCTTTTCTCTCTCGGCGGGGACTGTGCGTGGAAAAGCGTAGACAAGGAGATGCAAGTATTGGTGTGAGTGGATCGCAGCTTGGATGGCCACTTACCTGAATGACCACCTAGAGCCTTGG   |
| BCL2L1-208_exon1  | GGCTTGTTCGGGAGAGACGCGCGAGCAGTCAAGCAGGTAGGCCGCGCAGGATAGGCCGGCCGGGTCCGCGGCAGGAACTCGCCCGCAGAGAGCTTTCGCTGTAAGGCTACCGG          |
| BCL2L1-208_exon2  | GGCACTGTGCGTGGAAAGCGTAGACAAGGAGATGCAAGTATTGGTGTGAGTGGATCGCAGCTTGGATGGCCACTTACCTGAATGACCACCTAGAGCCTTGGATCCAGGAGAAGCGCGGCTG  |
| BCL2L1-208_exon3  | GATCGCAGCTTGGATGGCCACTTACCTGAATGACCACCTAGAGCCTTGGATCCAGGAGAAGCGCGGCTGGGATACTTTTGTGGAAGTCTATGGGAACAATGCAGCAGCCGAGAGCCGAAA   |
| BCL2L1-209_exon1  | CCGGAAGTGAAGTGGACTTGAAGTTCCCTGTCTTTCAGGGGAAACTGAGCCCGGCTTGTTCGGGAGAGACCCGCGAGCAGTCAAGCAGGTAGGCCGGCAGCCAGGTAGGCCGGCCCG      |
| BCL2L11-201_exon3 | ACAGGAGCCAGCACCCATGAGTTGTGACAAATCAACAAACAAACCCAGGCTCTTTCAGGCTTCAACCTGCTCAGTGAATGGCTTCCATGAGGCAGGCTAACCTGCAGATA             |
| BCL2L11-201_exon4 | TATCTCAGTGAATGGCTTCCATGAGGCAGGCTGAACCTGCAGATATGCGCCAGAGATATGGATCGCCCAAGAGTTGCGGGTATTGGAGACGAGTTAACGCTTACTATGCAAGGAGG       |
| BCL2L11-201_exon4 | CTTCCATGAGGCAGGCTGAACCTGCAGATATGCGCCAGAGATATGGATCGCCCAAGAGTTGCGGGTATTGGAGACGAGTTAACGCTTACTATGCAAGGAGGTTATTTTGAATAATT       |
| BCL2L11-201_exon5 | GCCGAGATACCATGCAGACATTTTGTGTGTTCAAACCAACAAGACCCAGCACCAGGCTCTCTGGTGGCATTATTATGCAGCCAGCGGTTCTTGTGGAGGGGGCAGGTGACGTTTTCAG     |
| BCL2L11-202_exon1 | GCGATCGCATATCGCGGATTCCGGTTCGCTGCGTTCCCGCCGCCACCGCCTCGGCGCCCTTCTTGGCCCTTGTCCCAAAATGCTGACTCTCGGACTGAGAAAACGCAAG              |

|                   |                                                                                                                          |
|-------------------|--------------------------------------------------------------------------------------------------------------------------|
| BCL2L11-202_exon2 | CAAAGCAACCTTCTGATGTAAGTTCTGAGTGTGACCGAGAAGGTAGACAATTGCAGCTGCGGAGAGGCCTCCCAGCTCAGACCTGGGGCCCTACCTCCCTACAGACAGAGCCACAAG    |
| BCL2L11-202_exon3 | CCCCTACCTCCCTACAGACAGAGCCACAAGACAGGAGCCAGCACCCATGAGTTGTGACAAATCAACACAAAACCCCAAGTCTCCTTGCCAGGCTTCAACCCTATCTCAGTGAATGG     |
| BCL2L11-202_exon3 | ACAGGAGCCCAGCACCCATGAGTTGTGACAAATCAACACAAAACCCCAAGTCTCCTTGCCAGGCTTCAACCCTATCTCAGTGAATGGTAGTCATCTAGAGGATATAGGTGATCTTT     |
| BCL2L11-202_exon4 | TAGTCACTCTAGAGGATATAGGTGATCTTTCAGTGTGCTTTGGATTTATATTACTGGCTTAGATTTGTATGGCCACCACCATAGTCAAGATACAGAAACAACCAACAGGATTTCT      |
| BCL2L11-203_exon3 | ACAGGAGCCCAGCACCCATGAGTTGTGACAAATCAACACAAAACCCCAAGTCTCCTTGCCAGGCTTCAACCCTATCTCAGTGAATGGTAGTCCGCTGGATCTCCCTCAGGATTTG      |
| BCL2L11-203_exon4 | TCCTCCTTGCCAGGCTTCAAGCTATCTCAGTGAATGGATGACTCCGCTGGATCTCCCTCAGAAATTGCCCTTCATAGGGAAGTTCAGTGGCCACTCAAGTGGTTAGCAAAATCAAG     |
| BCL2L11-203_exon4 | ATGACTCCGCTGGATCTCCCTCAGAATTGCCCTTCATAGGGAAGTTCAGTGGCCACTCAAGTGGTTAGCAAAATCAAGCTAACTGGGACTAGAAAACAGCTCCATCACCCAGTAAAGAGA |
| BCL2L11-203_exon5 | TGCAATGGATGACTCCGCTGGATCTCCCTCAGAATTGCCCTTCATAGGGAAGTTCAGTGGCCACTCAAGTGGTTAGCAAAATCAAGCTAACTGGGACTAGAAAACAGCTCCATCACCCAG |
| BCL2L11-203_exon5 | CTAACTGGGACTAGAAAACAGCTCCATCACCCAGTAAAGAGAAAAGAAAACATGGATCTGCCTAGGAAGTCACTCTGCCTGAGTCTGCTACTTGCAGGATTGGAGCTTTTGTGCAGATTA |
| BCL2L11-203_exon6 | TAAAGAGAAAAGAAAACATGGATCTGCCTAGGAAGTCACTCTGCCTGAGTCTGCTACTTGCAGGATTGGAGCTTTTGTGCAGATTACAGCTTTGAAGTCACTTTACCTCAAGAGCAGTT  |
| BCL2L11-204_exon2 | AAGTCTACTCTGTCAACCAGGCTGGAGTGCCTGGTGCATCTGGCTCACTGCAACCTCCAACCTCCCAAGTTCAAGCGGTTCTCCTGCCTCAGCCTCCCAAGTAGCTGGGATTACAG     |
| BCL2L11-204_exon2 | TCTCACTCTGTCAACCAGGCTGGAGTGCCTGGTGCATCTGGCTCACTGCAACCTCCAACCTCCCAAGTTCAAGCGGTTCTCCTGCCTCAGCCTCCCAAGTAGCTGGGATTACAGCTTC   |
| BCL2L11-204_exon3 | GTAGCTGGGATTACAGCTTCCATGAGGCAGGCTGAACCTGCAGATATGCGCCAGAGATATGGATCGCCCAAGAGTTGCGGGCTATTGGAGACAGGTTAACGCTTACTATGCAAGGAGG   |
| BCL2L11-204_exon4 | AACGCTTACTATGCAAGGAGGGTATTTTGAATAATTACCAAGCAGCCGAAGACCACCCACGAATGGTTATCTTACGACTGTTACGTTACATTGTCCGCTGGTGTGGAGAATGCATTGA   |
| BCL2L11-205_exon1 | GCGGGCTGGCGGGAAGCGCGGGCTTTGCGCTGCGCCGGGACTTGAACCCGAGTCCGCGGCTTTGTCTCCTGCGCTGCTTTCGTGGTGACGGTCAGGGGGCGCCGGTGGCGAAGGG      |
| BCL2L11-206_exon4 | CAAGTGAATGGTGGGACAGGTGGCTCCTGCCTAAGGACCACCTCAGGCCACTAACCCCTTGTGGACAAGTGTGAGTGTGGGTTTCCCCACCTGCTGTGCAACTTCTGTGCTTTG       |
| BCL2L11-206_exon2 | TCAGGGCCCGCTGGCCCCACCTGCCAGCCCTGGCCCTTTTGTACCAGATCCCGCTTTTCATCTTTATGAGAAGATCTCCCTGCTGTCTGCATCTCCAGTGGGTATTTCTCTTTTGA     |
| BCL2L11-206_exon3 | ATCTCAGTGAATGGCTTCCATGAGGCAGGCTGAACCTGCAGATATGCGCCAGAGATATGGATCGCCCAAGAGTTGCGGGCTATTGGAGACGAGTTAACGCTTACTATGCAAGGAGG     |
| BCL2L11-206_exon4 | ATACCATGCAGACATTTTGTGTTTCAAAACAAGACCAGCACCCGCGTCTCCTGGTGCCATTATTATGCAGCCAGCGGTTCTTCTGTGGAGGGGGCAGGTGACGTTTCAAGAAGACA     |
| BCL2L11-206_exon4 | TTGTGCTGCTGGCTTTTCTGGTTGCAGGCTTTCCCATGGTGCACAGGATGCACTGTCAGCATCAGGTCAGAGGGCCACCGTGTCCATTACAGCAGAGTCCAGCTGCAGCATCCAGCTCA  |
| BCL2L11-206_exon4 | GGATCTGGGACCCCTCCAGACTCCCTGTACTCAGTGTCCAGTCTCTGACTAGAGCATTTACTCTGTTTCTCAGCCCTGCAGCCCTGGGAGCACACACTGGGTGCAGCTCCAGG        |
| BCL2L11-206_exon4 | AAGTATTAACATCCCTGTCTCCACTCCCTGCGCTCCATGAAGTTAAGTCTGAGAGTTGCTGGGGGTGACTGGAGAGCTCATTGCAGACCAGTGGTCTCCAGGTTGGCTCTCCAC       |
| BCL2L11-207_exon1 | ATGGCAAAGCAACCTTCTGATGTAAGTTCTGAGTGTGACCGAGAAGGTAGACAATTGCAGCTGCGGAGAGGCCTCCCAAGCTCAGACCTGGGGCCCTACCTCCCTACAGACAGAGCCA   |
| BCL2L11-208_exon2 | ACAGGAGCCCAGCACCCATGAGTTGTGACAAATCAACACAAAACCCCAAGTCTCCTTGCCAGGCTTCAACCCTATCTCAGTGAATGGTTAGAGAAATAGAGGAAGTTGTGCTGATG     |
| BCL2L11-208_exon4 | GAGGAGGTGAGAGAGGCACAGGTATTTTGAATAATTACCAAGCAGCCGAAGACCACCCACGAATGGTTATCTTACGACTGTTACGTTACATTGTCCGCTGGTGTGGAGAATGCATTGA   |
| BCL2L11-209_exon2 | AGGAGCCAGCACCCATGAGTTGTGACAAATCAACACAAAACCCCAAGTCTCCTTGCCAGGCTTCAACCCTATCTCAGTGAATGGCTAACTGGGACTAGAAAACAGCTCCATCACCCA    |
| BCL2L11-209_exon5 | AGGTTCTTTGCGGAGCCGAGATACCATGCAGACATTTTGTGTTTCAAACAAGACCAGCACCCGCGTCTCCTGGTGCCATTATTATGCAGCCAGCGGTTCTTGTGGAGGGGGC         |
| BCL2L11-210_exon1 | CTGAGACTTTGGCATGGGGCTGCGCTGTGTCCACTGACGTTACAGAAGCGGTTATGAATTTAAAAAAGTGTCCAGGCGCCGGACGGCGGGACAACGCCTCCTCACTTGTCTCTTACG    |
| BCL2L11-210_exon2 | AAAAAAGACCAATGGCAAAGCAACCTTCTGATGTAAGTTCTGAGTGTGACCGAGAAGGTAGACAATTGCAGCTGCGGAGAGGCCTCCCAAGCTCAGACCTGGGGCCCTACCTCCCT     |
| BCL2L11-211_exon1 | TCTCCTGCGCTGCTTTCTGTGGTACGGTCAAGGGGCGCCGGTGGGGAAGGGCGGGCCGGACGCGCGGGGCTGGTCCCTGGCCCGGACGCTGCGCTCTGAAGGAAGGGCGGGAC        |
| BCL2L11-211_exon6 | ACAGGTTCTTTGCGGAGCCGAGATACCATGCAGACATTTTGTGTTTCAAACAAGACCAGCACCCAGCACCCGCGTCTCCTGGTGCCATTATTATGCAGCCAGCGGTTCTTGTGGAGGGG  |
| BCL2L11-213_exon2 | ACTATCTCAGTGAATGGCTTCCATGAGGCAGGCTGAACCTGCAGATATGCGCCAGAGATATGGATCGCCCAAGAGTTGCGGCGTATTGGAGACGAGTTAACGCTTACTATGCAAGGA    |
| BCL2L11-213_exon4 | CTGCTGATGATCCGCTTATGGGTATTTTGAATAATTACCAAGCAGCCGAAGACCACCCACGAATGGTTATCTTACGACTGTTACGTTACATTGTCCGCTGGTGTGGAGAATGCATTGA   |
| BCL2L11-214_exon1 | AAGCAACCTTCTGATGTAAGTTCTGAGTGTGACCGAGAAGGTAGACAATTGCAGCTGCGGAGAGGCCTCCCAAGCTCAGACCTGGGGCCCTACCTCCCTACAGACAGAGCCACAAGAC   |
| BCL2L11-218_exon3 | ACAGACAGAGCCACAAGCTTCCATGAGGCAGGCTGAACCTGCAGATATGCGCCAGAGATATGGATCGCCCAAGAGTTGCGGGCTATTGGAGACGAGTTAACGCTTACTATGCAAGGAG   |
| BCL2L11-218_exon3 | CTTCCATGAGGCAGGCTGAACCTGCAGATATGCGCCAGAGATATGGATCGCCCAAGAGTTGCGGGCTATTGGAGACGAGTTAACGCTTACTATGCAAGGAGGCTGGCAAACTCCTGG    |
| BCL2L11-218_exon4 | GAGTTGCGGGCTATTGGAGACGAGTTAACGCTTACTATGCAAGGAGGCTGGCAAACTCCTGGCATCCTCCACCTGACATAAACCAGTTCACAGAACATTCCAGCCTAGATCTGAAATG   |
| BCL2L11-218_exon4 | CTGGCAAACTCCTGGCATCCTCCACCTGACATAAACCAGTTCACAGAACATTCCAGCCTAGATCTGAAATGTTAGAGAAATAGAGAAAGTTGCTGTAGTTGTATTCAGTCCA         |
| BCL2L11-219_exon3 | GAGCCAGCACCCATGAGTTGTGACAAATCAACACAAAACCCCAAGTCTCCTTGCCAGGCTTCAACCCTATCTCAGTGAATGGCTAACTGGGACTAGAAAACAGCTCCATCACCCAG     |
| BCL2L11-219_exon3 | CTAACTGGGACTAGAAAACAGCTCCATCACCCAGTCTCCATGAGGCAGGCTGAACCTGCAGATATGCGCCAGAGATATGGATCGCCCAAGAGTTGCGGGCTATTGGAGACGAGTTAACG  |
| BCL2L11-219_exon4 | CAGCTCCATCACCCAGCTTCCATGAGGCAGGCTGAACCTGCAGATATGCGCCAGAGATATGGATCGCCCAAGAGTTGCGGGCTATTGGAGACGAGTTAACGCTTACTATGCAAGGAGG   |
| BCL2L11-221_exon4 | GAAATAGAGGAAGTTGTGCTGATGTTGCTATGATTCAGTCCACTTAAAGGGCAGTGGGGAAGCGTTTGGAGACGAGCTGTGGAGGCTGAATCCTTGAAGGAGGAGGTGAGAGAGGCACAG |
| BCL2L11-221_exon3 | CTTCCATGAGGCAGGCTGAACCTGCAGATATGCGCCAGAGATATGGATCGCCCAAGAGTTGCGGGCTATTGGAGACGAGTTAACGCTTACTATGCAAGGAGGTTAGAGAAATAGAGGA   |

|                         |                                                                                                                           |
|-------------------------|---------------------------------------------------------------------------------------------------------------------------|
| BCL2L11-222_exon3       | CTTCCATGAGGCAGGCTGAACCTGCAGATATGCGCCAGAGATATGGATCGCCCAAGAGTTGCGGCGTATTGGAGACGAGTTAACGCTTACTATGCAAGGAGGATGCCTCTTCCACCTG    |
| BCL2L11-222_exon4       | ATGCCCTTCCACCTGATTAAGAACCCTGTAGCAGACGCAGACTTATTGGACACTAGGCGGGAGGCCAGCTCTGCAGACAGCAGGTCAGGAAGACGGTCAAGGCATGGCTGTGTAGT      |
| BCL2L11-224_exon3       | ACAGGAGCCCAGCACCCATGAGTTGTGACAAATCAACACAACACCCCAAGTCTCCTTGGCAGGCCCTCAACCACATATCTCAGTGCAATGGTTAGAGAAATAGAGGAAGTTGTCTGTAG   |
| BCL2L11-225_exon2       | CAGACAGAGCCACAAGCTTCCATGAGGCAGGCTGAACCTGCAGATATGGATCGCCACAGATATGGATCGCCCAAGAGTTGCGGCGTATTGGAGACGAGTTAACGCTTACTATGCAAGGAGG |
| BCL2L11-225_exon3       | ATGAGGCAGGCTGAACCTGCAGATATGCGCCAGAGATATGGATCGCCCAAGAGTTGCGGCGTATTGGAGACGAGTTAACGCTTACTATGCAAGGAGGATGCCTCTCCACCTGATTA      |
| BCL2L2-201_exon1        | ATCACCCGGCGCCGGGCCCTCCTCTGCCCCCTTTCTCTCCCTCTTCTTCCCTCCCTTCCCTCTCTCCCTCCCTCCAGCTCCTGCACCAGAAACGGCCGGATCCCGGC               |
| BCL2L2-201_exon2        | AAACGGCCCGGATCCCGGCAGCGCCCTGACCCGGCTCCACGCTGGCCAGGAGGATGAAAGGCCCCAGCTGGGGGCTCCTTGCCACCAGTGTGTGTCTTAAGAGCTGCCATCCCGGCTGG   |
| BCL2L2-201_exon3        | TGTGACCCAGGCTCAGCCAAACACGCTTACCAGGCTCCGATGAACTTTTCAAGGGGGCCCAACTGGGGCCGCTTGTAGCTTCTTTGTCTTTGGGGCTGCACTGTGTGTGA            |
| BCL2L2-201_exon4        | TGGCAAGTTTAGGGGCACAGGAGATGTAGTCTTCCAGGGCTGGGGGAGGTGGGAGGATCACGCCTATAGGTGTGGGCACATGAAACGACCTGGAACCTGCTTACAGCCCTGAGGAAG     |
| BCL2L2-201_exon4        | TCTGATAGAAGGGCAGGGCTGTGAGCCTGGATGGGTGGAGGCTTAGGTAGCCGGACCTGCCGCCACCTCTCTCCACTCAGGCACAATGGTGCCTAAAGTGTTCATCTCTGGG          |
| BCL2L2-201_exon4        | AACTAGGCCAGTGGTTTTCAAACTGCTTGGCAGAGCCCTGAAGTTTCTTAGGGTTGCCTCAGGAGTCTTGGGGAGATGAAAGGGGTGGGGAGCTGAGCAGGCTGGGCAATTTGCCCTC    |
| BCL2L2-202_exon4        | TCTGGTGGCAGACTTTGTAGGTTATAAGCTGAGGCAGAAGGGTTATGTCTGTGGAGCTGGCCCCGGGAGGGCCAGCAGCTGACCCGCTGCACCAAGCCATGCGGGCAGCTGGAGATGA    |
| BCL2L2-202_exon1        | GTTTTCTTCAAGACAAGGATGATGTTAAATGGGCATTTGTTGCGGAATGACTTGGAGAGTTCTCTCTTTCAGCCATCTTTTCAAAAGACTAAGGCTGTGGACAGGATGGGCATG        |
| BCL2L2-202_exon2        | AAGACTGTCAAGGAGCCCGAGTGAGGGGAAGCAGACCAACCATGGTCTTGGAGAAAAGAAAATAGGGTTTCCATCCCTTGGAGGGAGAAGGAATAGCAGAGATGAACATGAATGAAGAA   |
| BCL2L2-202_exon3        | GAAGGAAAACAAATGGAATAAACAATAAAGGGCTCCACGCTGGCCAGGAGGATGAAAGGCCCCAGCTGGGGGCTCCTTGCCACCAGTGTGTGTCTTAAGAGCTGCCATCCCGGCTGG     |
| BCL2L2-202_exon3        | GGCTCCACGCTGGCCAGGAGGATGAAAGGCCCCAGCTGGGGGCTCCTTGCCACCAGTGTGTGTCTTAAGAGCTGCCATCCCGGCTGGCCGCCCGGATGGCGACCCAGCCTCGGCCCA     |
| BCL2L2-203_exon1        | AGCTGGGCTTTGGGCTGCACTAGGGGAAACGGGAATAGAGATGGTGTGCGCAGGAAGCCCTTGGCTTGGGTTTCCGGGAGGACAGTCAATAAACATGGATTCGGCCACACAGCTGG      |
| BCL2L2-203_exon2        | CCGCCCGGATGGCAGCCCAGCCTCGGCCAGACACACGGGCTCTGGTGGCAGACTTTGTAGGTTATAAGCTGAGGCAGAAGGGTTATGTCTGTGGAGCTGGCCCGGGAGGGCCAG        |
| BCL2L2-204_exon1        | CAGTGTGTGTGAGAGTGTCAAC AAGGAGATGGAACACTGGTGGGAC AAGTGCAGGAGTGGATGGTGGCCTACCTGGAGACGCAGCTGGCTGACTGGATCCACAGCAGTGGGGGCTGG   |
| BCL2L2-204_exon2        | CTGGGCGGAGTTCACAGCTCTATACGGGGACGGGGCCCTGGAGGAGGCGGGCGTCTGCGGGGAGGGAAGCTGGGCATCAGTGAGGACAGTGTGACGGGGCCGTTGGCAGCTGGGGCCCT   |
| BCL2L2-204_exon2        | GCGGAGTTCACAGCTCTATACGGGGACGGGGCCCTGGAGGAGGCGGGCGTCTGCGGGGAGGGAAGCTGGGCATCAGTGAGGACAGTGTGACGGGGCCGTTGGCAGCTGGGGCCCTGGTA   |
| BCL2L2-204_exon3        | GTATGGACACACTTCCACCTTACCACGGACACATATCCCTGTTAGCTATCCCGGGACTTTAGCCAAGAGGAGATGCCAGGACATGGCCAGGTTACAAAATGGCCCTG               |
| BCL2L2-205_exon1        | AGGAAACGGCCCGGATCCCGGCAGCGGCTGACCCGTGAGATCCCTAACCTTGGCAGGCGGGCGGGTTGGAGACTGGCTGAGGTGGGGGCTCCACGCTGGCCAGGAGGATGAAAGGCC     |
| BCL2L2-205_exon2        | GCGGGCGGGGTTGGAGACTGGCTGAGGTGGGGGCTCCACGCTGGCCAGGAGGATGAAAGGCCCCAGCTGGGGGCTCCTTGCCACCAGTGTGTGTCTTAAGAGCTGCCATCCCGGCTGG    |
| BCL2L2-205_exon4        | GTGTCAACAAGGAGATGGAACACTGGTGGGACAAGTGCAGGAGTGGATGGTGGCCTACCTGGAGACGCAGCTGGCTGACTGGATCCACAGCAGTGGGGGCTGGCGGAGTTCACAGCT     |
| BCL2L2-206_exon1        | ATCCCGGCAGCGGCTGACCCGTGAGATCCCTAACCTGGCAGGCGGGCGGGTTGGAGACTGGCTGAGGGCTCCACGCTGGCCAGGAGGATGAAAGGCCCCAGCTGGGGGCTCCTTGCCA    |
| BCL2L2-206_exon2        | TGGCAGGCAGGCGGGGTTGGAGACTGGCTGAGGGCTCACGCTGGCCAGGAGGATGAAAGGCCCCAGCTGGGGGCTCCTTGGCACCAGTGTGTGTCTTAAGAGCTGCCATCCCGGCTGG    |
| BCL2L2-PABPN1-201_exon1 | CTCCCTCCCTCCAGCTCCTGCACCAGGAAACGGCCCGGATCCCGGCAGCGGCCCTGACCCGGCTCCACGCTGGCCAGGAGGATGAAAGGCCCCAGCTGGGGGCTCCTTGGCACCAGTGT   |
| BCL2L2-PABPN1-201_exon4 | CTGGGAGCTGGAAGCTATCAAAAGCTCGAGTCAGGGAGATGGAGGAAGAAGCTGAGAAGCTAAAGGAGCTACAGAACGAGGTAGAGAAGCAGATGAATATGAGTCCACCTCCAGGCAATG  |
| BCL2L2-PABPN1-201_exon4 | GAGCTGGAAGCTATCAAAAGCTCAGTCAGGGAGATGGAGGAAGAAGCTGAGAAGCTAAAGGAGCTACAGAACGAGGTAGAGAAGCAGATGAATATGAGTCCACCTCCAGGCAATGCTGGC  |
| BCL2L2-PABPN1-201_exon5 | CTACAGAACGAGGTAGAGAAGCAGATGAATATGAGTCCACCTCCAGGCAATGCTGGCCCGGTGATCATGTCCATTGAGGAGAAGATGGAGGCTGATGCCCGTTCCATCTATGTTGGCAAT  |
| BCL2L2-PABPN1-201_exon5 | CTGGCCCGGTGATCATGTCCATTGAGGAGAAGATGGAGGCTGATGCCCGTTCCATCTATGTTGGCAATGTGGACTATGGTGCACACAGCAGAAGAGCTGGAAGCTCACTTTCATGGCTGTG |
| BCL2L2-PABPN1-201_exon6 | CTATGTTGGCAATGTGGACTATGGTGCACAGCAGAAGAGCTGGAAGCTCACTTTCATGGCTGTGGTTCAGTCAACCGTGTACCATACTGTGTGACAAATTTAGTGGCCATCCAAAGG     |
| BCL2L2-PABPN1-201_exon6 | GTGGACTATGGTGCACAGCAGAAGAGCTGGAAGCTCACTTTCATGGCTGTGGTTCAGTCAACCGTGTACCATACTGTGTGACAAATTTAGTGGCCATCCAAAGGTTTGGCTATATA      |
| BCL2L2-PABPN1-201_exon7 | CTGTGTGACAAATTTAGTGGCCATCCAAAGGGTTTGGCTATATAGAGTTCAGACAAAAGAGTCAAGTGGACTTCCCTGGCCCTTAGATGAGTCCCTATTAGAGGAAGGCAAAATCAAG    |
| BCL2L2-PABPN1-201_exon7 | TTTGGCTATATAGAGTTCAGACAAAAGAGTCAAGTGGACTTCCCTGGCCCTTAGATGAGTCCCTATTAGAGGAAGGCAAAATCAAGGTGATCCCAAACGAACCAACAGACCAGGCATC    |
| BCL2L2-PABPN1-201_exon8 | GTGATCCCAAACGAACCAACAGACCAGGCTACGACAACAGACCGGGGTTTTCCACGAGCCCGCTACCCGCGCCGGACCACCAACTACAACAGCTCCCGCTCTCGATTCTACAGTGGT     |
| BCL2L2-PABPN1-201_exon9 | GGGCCGGCTAGAGCGACATCATGGTATTCCTTACTAAAAAAGTGTGATTAGGAGGAGAGAGAGGAAAAAAGAGGAAAAAAGAAATTAAGGAAAAAAGAA                       |
| BCL2L2-PABPN1-202_exon1 | CTCTGACACAGAAACGGCCCGGATCCCGGACCGGCTGACCCGGCTCCACGCTGGCCAGGAGGATGAAAGGCCCCAGCTGGGGGCTCCTTGGCACCAGTGTGTCTTAAGAGCTG         |
| BCL2L2-PABPN1-202_exon4 | CAGCAGCTGGCTGACTGGATCCACAGCAGTGGGGCTGGTTATCCAGATCACTGAAGCTGAGATGGCTGATGAAGTAATTTGAGTGAATTTAAGCGACTGTGACTCTGCTGCAAG        |
| BCL2L2-PABPN1-203_exon1 | TTTGGGCTGCACTAGGGGAAACGGGAATAGAGATGGTGTGCGCAGGAAGCCCTTGGCCTTGGGTTTCCGGGAGGACAGTCAATAAACATGGATTCGGCCACACAGCTGGTAGAGCGTT    |
| BCL2L2-PABPN1-203_exon8 | GTGGTTTTAACAGCAGGCCCGGGTCCGCTTACAGGGGCCGGCTAGAGCGACATCATGGTATTCCCTTACTAAAAAAGTGTGATTAGGAGGAGAGAGGAAAAAAGAGGAAA            |
| BID-201_exon1           | GGGCTGGCAAGGGTTCATTCATTCATCAACAATAACGAATGTGCAGCGGTGCTGGGGTATGATGGCTCGGTGGCAGCAGGGGCCGGCCGGCTGGAGGACACAGTGGGATTC           |

|                   |                                                                                                                          |
|-------------------|--------------------------------------------------------------------------------------------------------------------------|
| BID-201_exon2     | CGGTGGCAGCGAGGGGCCGGGCCGGCTGGAGGAGCACAGTGCAGTCTGTCCGCACTGGGACACTGTGAACCAGGAGTGAGTCGGAGCTGCCGCGCTGCCAGGCCATGGACTGTGAG     |
| BID-201_exon2     | GTCCGCACTGGGACACTGTGAACCAGGAGTGAGTCGGAGCTGCCGCGCTGCCAGGCCATGGACTGTGAGGTCACAACGGTTCCAGCCTCAGGGATGAGTGCATCAAAACCTACTGGT    |
| BID-201_exon3     | GTCAACAACGGTTCCAGCCTCAGGGATGAGTGCATCAAAACCTACTGGTGTGGCTTCCCAAAGCTGTTCTGACAACAGCTTCCGCAGAGAGCTGGACGCCTGGGCCACGAGCTG       |
| BID-201_exon4     | ATTCGTAAAGTCAAGAAGATCATCCGGAATATTGCCAGGCACCTCGCCAGGTCGGGACAGCATGGACCGTAGCATCCCTCCGGGCCCTGGTGAACGGCCCTGGCCCTGCAGCTCAGGA   |
| BID-201_exon5     | GACCGGAACAGGGACCTGGCCACTGCCCTGGAGCAGCTGCTGCAGGCCACCTAGAGACATGGAGAAGGAGAAGCACCATGCTGGTGGCTGGCCCTGCTGTGGCCAAAGAAGCTGGCCAGT |
| BID-201_exon6     | GGGATGGACTGAACGGACAGTTCAGAAAGTGTGACTGGCTAAAGCTCGATGTGGTCACAGCTGTATAGCTGCTCCAGTGTAGACGGAGCCTGGCATGTCAACAGCGTTCCTAGAGAAG   |
| BID-201_exon6     | TTCCATGACATCAAGACTTTGTAAAGACATGAAGCCACGGGTGCCAGAAGCTACTGCGATGCCCCGGGAGTTAGCCCCCTGGTAATAGCTGTAAACTTCCAATTTCTAGCCATACGCTC  |
| BID-202_exon1     | GGACGCGCCCGCCCGCCCGGGCTGGAGGGTGGTCCGCACTGGGACACTGTGAACCAGGAGTGAGTCGGAGCTGCCGCGCTGCCAGGCCATGGACTGTGAGGTCACAACGGTTCCAGC    |
| BID-202_exon4     | TCCCGCTTGGGAAGAATAGAGGCAGGGGCGTCAGACAATAACACAGCAAGTGCTGAGGAAGAAACGGAGGCGGCAGGGAGCGTGGCAGTTGAGCGTGGCCCTCATGGAGCTGCGACAGTG |
| BID-202_exon4     | GGGCGTCAGACAATAACACAGCAAGTGCTGAGGAAGAAACGGAGGCGGCAGGGAGCGTGGCAGTTGAGCGTGGCCCTCATGGAGCTGCGACAGTGATTCTGAAAGTCAAGAAGACATCAT |
| BID-202_exon7     | ACCTACGTGAGGAGCTTAGCCAGAAATGGGATGGACTGAACGGACAGTTCAGAAGTGTGACTGGCTAAAGCTCGATGTGGTCACAGCTGTATAGCTGCTCCAGTGTAGACGGAGCCCT   |
| BID-203_exon1     | GGAAGCGCGCGGGGCGCCATAAGGAGGAAGCGGGTAGTCGACCGTGTCCGCGCGCTGGGAGACGCTGCCCTCGGCCCGGACGCGCCCGCCCGCGGGCTGGAGGGTGTATTCTGAAAGT   |
| BID-204_exon1     | GAAGGAGGAAGCGCGCGGGGCGCCATAAGGAGGAAGCGGGTAGTCGACCGTGTCCGCGCGCTGGGAGACGCTGCCCTCGGCCCGGACGCGCCCGCCCGCGGGCTGGAGGGTGGTCAA    |
| BID-205_exon1     | GGAGGAAGCGCGGGGCGCCATAAGGAGGAAGCGGGTAGTCGACCGTGTCCGCGCGCTGGGAGACGCTGCCCTCGGCCCGGACGCGCCCGCCCGCGGGCTGGAGGGTGGTCCGCCAC     |
| BID-205_exon6     | AGCTACTGCGATGCCCGGGAGTTAGCCCTGGTAATAGCTGTAAACTTCCAATTTCTAGCCATACGCTCAGCTCATCCATGCCTCAGAAGTGCATCTGGAGAGAAGAGGTTTCTAAGC    |
| BID-206_exon4     | CTAGAGACATGGAGAAGGAGAAGACCATGCTGGTGTGGCCCTGCTGTGGCCAAAGAAGTGGCCAGTACACGCGCTCTTGTCTCCGTGATGCTTTACACAACAGTGAATTTTATTA      |
| BID-207_exon1     | GACTGGACGGCAGGGAGTGGGGCTGTCATCATCAGATGAGAGCTAAGGGGACCCACCAGGGTGGCGGCATGGCAGAGGGTAGGCAAAACGCTTGTATTTGCAACATAAGGTGAGATT    |
| BID-207_exon1     | CGGACCTGTCTTTCCCGGGCAGGGTGGTGTGGGAGAGGGTATCAGGGACATTTCTGAGTCTGCTCTGTCTCTGCCGCCCTGCCTGAACACAGATTCTGAAAGTCAAGAAGACATCA     |
| BID-208_exon4     | CGCGGACCTGTCTTTCCCGGGCAGGGTGGTGTGGGAGAGGGTATCAGGGACATTTCTGAGTCTGCTCTGTCTCTGCCGCCCTGCCTGAACACAGATTCTGAAAGTCAAGAAGACAT     |
| BID-208_exon6     | TTGCTCCGTGATGCTTTTACACAACAGTGAATTTTATAAACCAGAACCTACGCACCTACGTGAGGAGCTTAGCCAGAAATGGGATGGACTGAACGGACAGTTCAGAAGTGTGACTGGC   |
| BID-209_exon1     | CACGTCTGAAACAGTCGCGTAAGGGTCCGCACTGGGACACTGTGAACCAGGAGTGAGTCGGAGTCCCGCGCTGCCAGGCCATGGACTGTGAGGTCAACAACGGTTCAGCTCAGG       |
| BID-210_exon1     | CCAGACTGTTCCAGAAACAGCTGGGGTCTGAATGTTTCCAGAGAAATCATTAGGAATATCCAGCGCGCTGGAGTCAACAACGGTTCAGCTCAGGATGATGCATCAAAAC            |
| BID-210_exon3     | CCCCAGTGGGAGGGCTACGATGAGCTGCAGACTGATGGCAACCGCAGCAGCACTCCCGTGGGAAGAATAGAGGCAGATTCTGAAAGTCAAGAAGACATCATCCGGAATATTGCCAGG    |
| BID-211_exon1     | CACGTCTGAAACAGTCGCGTAAGGGTATTGAAAGTCAAGAAGACATCATCCGGAATATTGCCAGGCACCTCGCCAGGTCGGGACAGCATGGACCAGTGCATCCCTCCGGCCTGGT      |
| BID-212_exon2     | GTCCGCACTGGGACACTGTGAACCAGGAGTGAGTCGGAGCTGCCGCGCTGCCAGGCCATGGACTGTGAGATTCTGAAAGTCAAGAAGACATCATCCGGAATATTGCCAGGCACCTCGCC  |
| BID-213_exon1     | CTGGGCTGGCAAGGGTTCATTCATTCATCAACAAATACGAATGTGCAGCGGTGCTGGGGTTCATGATGGCTCGGTGGGCAGCAGGGGCGGGCCGGCTGGAGGAGCACAGTGCAGGATTC  |
| BID-214_exon4     | GGGCGTCAGACAATAACACAGCAAGTGCTGAGGAAGAAACGGAGGCGGCAGGGAGCGTGGCAGTTGAGCGTGGCCCTCATGGAGCTGCGACAGTGGTACTCGGGCAGGGGAGCAGCGGAG |
| BID-215_exon1     | GAAGGAGGAAGCGCGCGGGGCGCCATAAGGAGGAAGCGGGTAGTCGACCGTGTCCGCGCGCTGGGAGACGCTGCCCTCGGCCCGGACGCGCCCGCCCGCGGGCTGGAGGGTGGTCCG    |
| BID-215_exon2     | GAGACGCTGCCTCGGCCCGGACGCGCCCGCCCGCGGGCTGGAGGGTGGTCCGCACTGGGACACTGTGAACCAGGAGTGAGTCGGAGCTGCCGCGCTGCCAGGCCATGGACTGTGAG     |
| BIK-201_exon1     | AGACAGGAAGCTCCCGGTGGCTTACAGACGCTGCCAGCATGCCCGCCAGAGGAGAAATGTGAAAGTAAAGACCCCTCTCCAGAGACATCTGATGGAGACCCTCTGTATGAGCA        |
| BIK-201_exon2     | GACCCCTCTGATGAGCAGCTTGGAAACCCCGACCATGGAGGTTCTTGGCATGACTGACTCTGAAGAGGACCTGGACCCTATGGAGGACTTCGATTCTTTGGAATGCATGGAGGGCAG    |
| BIK-201_exon3     | TTGGAATGCATGGAGGGCAGTGACGCATTGGCCCTGCGGCTGGCTGCATCGGGACGAGATGGACGTGAGCCTCAGGGCCCCGCGCTGGCCAGCTCTCCGAGGTGGCCATGCACAG      |
| BIK-201_exon3     | TGACGCATTGGCCCTGCGGCTGGCTGCATCGGGACGAGATGGACGTGAGCCTCAGGGCCCCGCGCTGGCCAGCTCTCCGAGGTGGCCATGCACAGCCTGGGTCTGGCTTTCATCTA     |
| BIK-201_exon4     | GCTTTCATCTACGACCAGACTGAGGACATCAGGGATGTTCTTAGAAGTTTCATGGACGGTTTACCACACTAAGGAGAACATAATGAGGTTCTGGAGATCCCGAACCCCGGGTCTGG     |
| BIK-201_exon5     | CCCCGCGGGTACAGGGCGGGCTGGCCCCACCCCATGACCCTGCCTGGAGGTGGCGGCTGCTGCTGTTATCTTTTAACTGTTTTCTCATGATGCCTTTTTATAITTAACCCCGA        |
| BOK-201_exon1     | GGCGCCGGGGCGGGGCGCGCTCTCGGGTCTGAATGGAAGGGTGCAGGTCGTCGTCGGCGGCAGCAGATCTGAAGCCAGAATCCACCCGGCGCCCGGCCATGCGGGCGGGAGA         |
| BOK-201_exon2     | CGAGATCATGGACGCTTTGACCGCTGCCACAGACAAGGAGCTGGTGGCCAGGCCAAGGCGCTGGGCCGGGAGTACGTGCACGCGCGGCTGTGCGCGCCGGCTCTCTGGAGCGC        |
| BOK-201_exon4     | GCATACGTGGGGCAAGGTGGTGTCTCTGATGTCGCTGGTGGCCGCGGGGCTGGACTGTGTGAGGACAGGCCAGCTGCCATGGTCCACGCCCCTGTTGGACTGCTGGGGAGTTCG       |
| BOK-201_exon5     | GACCTCCCCGCTTGTGCTCTCTCTGATCTCTGTTTCTTCTTCTGGGGCAGGAAGTCAAGGTCAACTCCAGGCCATGATGAGGGGCCAGAACACCTGCTCTC                    |
| BOK-201_exon5     | GGTGGCCATGTGCCAGGACAGGAGGGTCCCGGGGAAAGCCAGCCCGGACTCATCGTGACATTGAGATCCACTGGAGGGTAGGGGTGGTAATAAACTTCTCAAACGATCGTTGTCA      |
| BOK-202_exon1     | CGTGAGGCTGCTTTTCTGTGACTCGGAACCAGCGCACCCCATCGTCACTGCAGGCGATGAGCTGGAGATGATCCGGCCAGCGTCTACCGCAACGTGGCGGTCAGTGCACATCTCCC     |
| BOK-202_exon2     | TGGAGATGATCCGGCCAGCGTCTACCGCAACGTGGCGGTCAGTGCACATCTCCCTGCAGTCTGAGCCTGTGGTACCAGTGCCTTCTGGCCGTGGCTGGCCACATCTTCTGTCAG       |
| BOK-AS1-201_exon1 | CGCGGGCGCCGGGTGGAGTCTGGCTTACAGGATCTGCTGCCGCCAGCAGCAGCTCGACCTTCCATTAGACCCGCGAGGACGCGCGCCCGCCCGGGCGCCCGCCCGTCCAGCC         |

|                   |                                                                                                                         |
|-------------------|-------------------------------------------------------------------------------------------------------------------------|
| BOK-AS1-201_exon2 | GGCCTCCAGAGGAACACAGCGCTGCCGACTCCTTGATTCTAACCCACTGAGGCCTATTTGGATTTCTGCACCCAGAACTGTGGGAGAGTAAATTGTGCTGTTGAAGCCACCACATTTGT |
| HRK-201_exon1     | GGCTGTGCGCGGCCGCGCAGGTGGCGGCCTGGCGGCCTGGCTGCTCGGCAGGCGGAACCTGTAGGAACCGGGGCTTCTTGGTGGGGCCGGAGCCGAGACCCAGCCGGAGCGAGCAACA  |
| HRK-201_exon2     | GTTGGTGA AAAACCTGTGTCTTGGAGAAAAGCTGGTCCCGTTTCCAGAGGGGGAGCCAGAGCTGAAAAGGCCCGGTTGGCACTTCGAGAAGGAAGTGGAGAGTAAAGACAGCGCCT   |
| HRK-201_exon2     | TCTGTGCAGGATACCACACTGCCATTTTCAAAGCCAGGTGGCGAGGTGTCAAGCTGCAGATTCCGAGCGGTCAATTCCAAAGGCTGGATTTCAGGTCACCACCGGTACCTATAGAC    |
| HRK-201_exon2     | TTCCCTGGAGGATACAAAACCCAAACGCTGGGGTTGGCATTGGGTGATTTGATTTCAATGAAGCCACTTTGCTGAGAGAACTGGGGCACCACGACCTCCTGATAGAGTCTCAG       |
| HRK-201_exon2     | AGATGAAGAGACTTTTGCCCTTTCATTCTGATGGTGTCTTGTCTCAGAGAGTGGGGAGCCAGGAACCGCTGGGACTGGAGCCCGGGACTTCAACACTCCGAATGAGATCCAGTC      |
| HRK-201_exon2     | TCTACTCTGTCAACCAGGCTGGAGTGCAGTGGTGCAGCTCAGCTCACTGCAACCTCCACCTCCAGGTTCAAGCGATTCTCTGCCCTCAGCCTCCTGAGTAGCTGGGATTACAGGCAC   |
| HRK-201_exon2     | AAGGCTTTGCACTATAAGCGCCAAGGAGCCCGTGTGCTGGCAGGGGCGGCTGGGAGGGTATCTGGAGAACCTTAGTGAGGCTCTGGCCTAGCCAGAGAGGCAATAAGCTTGGGGACG   |
| HRK-202_exon1     | GCGGCGCGCAGGTGGCGGCCTGGCGGCCTGGCTGCTCGGCAGGCGGAACCTGTAGGAACCGGGGCTTCTTGGTGGGGCCGGAGCCGAGACCCAGCCGGAGCGAGCAACAGCCTACAT   |
| HRK-202_exon2     | CCGGAGCCGAGACCCAGCCGGAGCGAGCAACAGCCTACATCTGACCTCAGAATACCAGCCGCTCCGGCCTTCTTGTGCTTTTGATTAAATTTGGGAAACTCATTTTTCCAGCTCTG    |
| HRK-202_exon2     | CCTACATCTGACCTCAGAATACCAGCCGCTCCGGCCTTCTTGTGCTTTTGATTAAATTTGGGAAACTCATTTTTCCAGCTCTGAGCCCCAGGGGAGGCTCCTCTGAGGCTGGGGAG    |
| HRK-202_exon3     | CCCAGCTCTGAGCCCCAGGGGAGGCTCCTCTGAGGCTGGGGAGGCTGGAGGAGGATGGGTATGATTTAACAGTCAATACTCAAAGATACAGGAGAGAGGGAAACAAAAGACGCTTTATG |
| HRK-202_exon3     | AGCCCCAGGGGAGGCTCCTCTGAGGCTGGGGAGGCTGGAGGAGGATGGGTATGATTTAACAGTCAATACTCAAAGATACAGGAGAGAGGGAAACAAAAGACGCTTTATGGTGGTTGAGA |
| HRK-202_exon4     | GTGGTTGAGATCTCCCATGTCAACACGCAAAGGTTTTCTCATCCCTTTTAAATGGCTGCATGATGTTCTGTGCTGGATGAACAGGATTTCCCTATATGGTCACTTCCCTGGGAACA    |
| HRK-202_exon5     | TGTGCTCTGGAGAAAAGCTGGTTCCTGTTTTCCAGAGGGGGAGCCAGAGCTTGAAGGCCGCGGTTGGCACTTCGAGAAGGAAGTGGAGAGTAAAGACAGCGCTGGAGCGATCGTAGA   |
| HRK-203_exon1     | GCTGCCAATCCAGGGACAGGAAGAACATTTGGATGGATCGCGGGGTGCAGAAAAAGGAAGTTGAGCGACAGACGCGAAGCCAAAGCGTGAATTTGGGAAGAGGCAGAAAAAAGT      |
| HRK-204_exon1     | TTTGATTTAAATTTGGGAAACTCATTTTTCCAGCTCTGAGCCCCAGGGGAGGCTCCTCTGAGGCTGGGGAGGCTGGAGGAGGATGGGTATGATTTAACAGTCAATACTCAAAGATA    |
| HRK-204_exon2     | AGCCCCAGGGGAGGCTCCTCTGAGGCTGGGGAGGCTGGAGGAGGATGGGTATGATTTAACAGTCAATACTCAAAGATACAGGAGAGAGGGAAACAAAAGACGCTTTATGGGAAGCTTCA |
| HRK-204_exon3     | GGAAGCTTCATGAAAGGGACATGAATTTGGAGTCAAGCCGACTTTCACATCACTTCTCCATCTCGCATTTGCCAGTTGTGTGACCTTAGGCCGATCCATTACCTCTGAGCCTTGG     |
| MCL1-201_exon1    | AACACCAGTACGGACGGGTCCTACCTCGACGCCGCCAGCAGAGGAGGAGGAGGACGAGTTGTACCGGCGCTCGTGGAGATTATCTCTCGGTACCTTCGGGAGCAGGCCACCGGC      |
| MCL1-202_exon1    | ACTTCTACTTCCGCTTCTTCCAGTAAGGAGTCCGGGCTTCCCACTTTCTCAGCCAGGCGGCGGCGGCACTGGCAATGTTGGCTCAAAGAAACGCGGTAATCGGACTCAACC         |
| MCL1-202_exon3    | ATTATAAAATGATGGCTTGAAAAGCAGGCTAGTCTAACCATGGTGTATTATTAGGCTTGTGTTACACACACAGGCTCAAGCCTAGTATGTCATAAAAGCAAATACCTACTGTTTTG    |
| MCL1-202_exon3    | AGTGGTGGGTTTATAGGGGGAGGAGGAGGAGGCTTAAGTGTGACTGGCTACGTAGTTCCGGCAAATCTCCAAAAGGGAAAGGAGGATTTGCTTAGAAGGATGGCGCTCCAGT        |
| MCL1-203_exon1    | CGCCGCGGGTGGCAGGCAATCTTGCGCCGTTTAGACAAAAGAGGCGGTGAGGACCTGCATGCTTTTCTTCTCAGGCATGCTTCGAAAACGGACATCAAAAACGAAGACGATGTGA     |
| MCL1-204_exon1    | CCTAAAACCGTGATAAAGGAGTGTCTGCCACTTCTCACTTCCGCTTCTTCCAGTAAGGAGTCCGGGCTTCCCACTTTTCTCAGCCAGGCGGCGGCGGACTGGCAATGTTGGCC       |
| MCL1-204_exon2    | GCCACCGGCGCAAGGACACAAAAGCAATGGGAGGCTGGGGCCACCAGCAGGAAGGCGCTGGAGACCTACGACGGGTTGGGGATGGCGTGCAGCGCAACCACGAGACGGCTTCCAA     |
| MCL1-204_exon3    | GCATGCTTCGAAACTGGACATCAAAAACGAAGACGATGTGAAATCGTTGTCTCGAGTGTATCCATGTTTCAGCGACGGCGTAACAAACTGGGGCAGGATTGTGACTCTCATTTCTT    |
| MCL1-204_exon4    | GATGGGTTTGTGGAGTCTTCCATGTAGAGGACCTAGAAGTGGCATCAGGAATGTGCTGCTGGCTTTTGCAGGTGTGTGCTGGAGTAGGAGCTGGTTGGCATATCTAATAAGATAGCCT  |
| MCL1-204_exon4    | TGGCTTGAAAAGCAGGCTAGTCTAACCATGGTGTATTATTAGGCTTGTGTTACACACACAGGCTTAAGCCTAGTATGTCATAAAGCAAATACCTACTGTTTTGTTCTATTAATG      |
| MCL1-204_exon4    | GACTGTGAAATACAGACAAGGCTTAGTTGATATTTGGGCTTGGGGCAGTGAAGGCTTAGGACACCCCAAGTGGTTGGGAAAGGAGGAGGGAGTGGTGGGTTATAGGGGAGGA        |
| PMAIP1-201_exon1  | CGTGTGATTTGGCATCTCCGCGGCTCCGACACCCGATCCAGCATCCCTGCTGCAAGGACTGTTCTGTGTCAGCTCGCGTCCAGCTGCTCCGAGGTGCTCCAGTTGGAGGCTGAGG     |
| PMAIP1-201_exon2  | CCAAGCCGATTTGCGATTGGGATGCAGCTGCGTTTACCAGGGGCAAAAAGCTCCTTTCTCTCTCTTCTCTCTCGCCACTTGCCCTTCCCGGGGCCACGAGGAACAAGTGAAGT       |
| PMAIP1-201_exon3  | GCCTACTGTGAAGGGAGATGACCTGTGATTAGACTGGGCGGCTGGGGAGAAAAGTTCAGTGCATTGTTGTTGTTGTTGTTTGGTGTGTTTCTTCTCAGTGCCAACTCAGCACATTGT   |
| PMAIP1-202_exon1  | AGGGAAGTTCTACTGGACAAAAGCGTGGTCTTGGCGCGGGGATCTCAGAGTTCCCGGCACTCACCGTGTGATGTTGGCATCTCCGCGCTCCGGACACCCGATCCAGCATCCCTG      |
| PMAIP1-202_exon2  | AGCTGGAAGTCTGAGTGTCTACTCAACTCAGGAGATTGGAGACAAAACGAACTTCCGGCAGAAACTTCTGAATCTGATATCAAACCTTCTGCTCAGGAACCTGACTGCATCAAAAAC   |
| PMAIP1-202_exon2  | CAGATGATCTTCAATCAATGTGTTCTGTTGGGCGTTACTAGAAAACATGGAATAACTTTGAAAAAATGGATAAAGTATAGGAGGGTACTTGGGGCCAGTAAATCAG              |
| PMAIP1-203_exon1  | GCGCTCCGGACACCCGATCCAGCATCCCTGCCTGCAGGACTGTTCTGTTTCTGCTCGCTCCTGCAGCTGCTCCAGGTGCTCCAGTTGGAGGCTGAGGTTCCCGGGCTCTGTAGCTGA   |
| PMAIP1-203_exon2  | TCCCTTCTCTCTTCTTCTCTCGCCACTTGCCCTTCCCGGGGCCACGAGGAACAAGTGAAGTGTAGGCGGCTGTCTTAGGAGAAAATCATTGTCCGGCAGAAAGGGCAGGAGA        |
